# Supplementary material for: A Catalog of Natural Products Occurring in Watermelon—Citrullus lanatus
Source: Front Nutr. 2021 Sep 14;8:729822. doi: 10.3389/fnut.2021.729822 (PMC8476801; doi:10.3389/fnut.2021.729822)
Supplement: Supplementary file 1 [file Table_1.XLSX]

## Sheet: Sheet1
Compound Name	CAS_ID	KEGG_ID	HMDB_ID	PubChem_ID	ChEBI_ID	FooDB_ID	LipidMaps_ID	Molecular Formula	Molecular Weight	AFC_ID	InChI key	SMILES	InChI	AlogP	apol	Eccentric Connectivity Index Descriptor	FSP3	Zagreb Index	Topo PSA	tpsa efficiency	Lipinski Rule Of 5 Failures
(-)-(4S)-limonene	5989-54-8	C00521	HMDB0004321	439250	15383	FDB006329	LMPR0102090002	C10H16	136.234	AFC000385	XMGQYMWWDOXHJM-UHFFFAOYSA-N	C=C(C)C1CC=C(C)CC1	InChI=1S/C10H16/c1-8(2)10-6-4-9(3)5-7-10/h4,10H,1,5-7H2,2-3H3	3.503	28.269	88	0.6	46	0	0	0
(-)-alpha-cuprenene	29621-78-1	C20180		5316205	63701			C15H24	204.352	AFC001196	DYQFFTPJVWEYMH-UHFFFAOYSA-N	CC1=CC=C(CC1)C2(C)CCCC2(C)C	InChI=1S/C15H24/c1-12-6-8-13(9-7-12)15(4)11-5-10-14(15,2)3/h6,8H,5,7,9-11H2,1-4H3	4.654	42.403	177	0.733	82	0	0	1
(-)-alpha-pinene	7785-26-4	C06308	HMDB0035658	440968	28660	FDB004843		C10H16	136.234	AFC000731	GRWFGVWFFZKLTI-UHFFFAOYSA-N	CC1=CCC2CC1C2(C)C	InChI=1S/C10H16/c1-7-4-5-8-6-9(7)10(8,2)3/h4,8-9H,5-6H2,1-3H3	2.873	28.269	74	0.8	58	0	0	0
(-)-alpha-terpineol	10482-56-1	C11393	HMDB0036086	443162	128	FDB014922		C10H18O	154.25	AFC000742	WUOACPNHFRMFPN-UHFFFAOYSA-N	CC1=CCC(CC1)C(C)(C)O	InChI=1S/C10H18O/c1-8-4-6-9(7-5-8)10(2,3)11/h4,9,11H,5-7H2,1-3H3	2.415	30.404	99	0.8	54	20.23	0.131	0
(-)-beta-caryophyllene	87-44-5	C09629	HMDB0036792	5281515	10357	FDB015736	LMPR0103120001	C15H24	204.352	AFC001010	NPNUFJAVOOONJE-UHFFFAOYSA-N	CC1=CCCC(=C)C2CC(C)(C)C2CC1	InChI=1S/C15H24/c1-11-6-5-7-12(2)13-10-15(3,4)14(13)9-8-11/h6,13-14H,2,5,7-10H2,1,3-4H3	4.753	42.403	165	0.733	80	0	0	1
(-)-beta-pinene	18172-67-3	C06307	HMDB0036560	440967	28359	FDB015463	LMPR0102120013	C10H16	136.234	AFC000730	WTARULDDTDQWMU-UHFFFAOYSA-N	C=C1CCC2CC1C2(C)C	InChI=1S/C10H16/c1-7-4-5-8-6-9(7)10(8,2)3/h8-9H,1,4-6H2,2-3H3	2.927	28.269	74	0.8	58	0	0	0
(-)-cuparene				11084908		FDB005922		C15H22	202.336	AFC001159	SLKPBCXNFNIJSV-UHFFFAOYSA-N	CC1=CC=C(C=C1)C2(C)CCCC2(C)C	InChI=1S/C15H22/c1-12-6-8-13(9-7-12)15(4)11-5-10-14(15,2)3/h6-9H,5,10-11H2,1-4H3	4.209	41.069	177	0.6	82	0	0	1
(-)-jasmonate	6894-38-8	C08491	HMDB0032797	5281166	18292	FDB015493		C12H18O3	210.27	AFC000926	ZNJFBWYDHIGLCU-UHFFFAOYSA-N	CCC=CCC1C(CCC1=O)CC(=O)O	InChI=1S/C12H18O3/c1-2-3-4-5-10-9(8-12(14)15)6-7-11(10)13/h3-4,9-10H,2,5-8H2,1H3,(H,14,15)	1.966	35.528	203	0.667	68	54.37	0.259	0
(-)-jasmonic acid methyl ester	1211-29-6	C11512	HMDB0036583	5281929	15929	FDB015494	LMFA02020010	C13H20O3	224.297	AFC001033	GEWDNTWNSAZUDX-UHFFFAOYSA-N	CCC=CCC1C(CCC1=O)CC(=O)OC	InChI=1S/C13H20O3/c1-3-4-5-6-11-10(7-8-12(11)14)9-13(15)16-2/h4-5,10-11H,3,6-9H2,1-2H3	2.217	38.622	231	0.692	72	43.37	0.193	0
(-)-lariciresinol	83327-19-9	C20454		23815394	67244	FDB011629		C20H24O6	360.402	AFC000631	MHXCIKYXNYCMHY-UHFFFAOYSA-N	COC1=CC(=CC=C1O)CC2COC(C3=CC=C(C(=C3)OC)O)C2CO	InChI=1S/C20H24O6/c1-24-18-8-12(3-5-16(18)22)7-14-11-26-20(15(14)10-21)13-4-6-17(23)19(9-13)25-2/h3-6,8-9,14-15,20-23H,7,10-11H2,1-2H3	-0.026	56.015	553	0.4	134	88.38	0.245	0
(-)-matairesinol	580-72-3	C10682	HMDB0035698	119205	6698	FDB014417		C20H22O6	358.386	AFC000519	MATGKVZWFZHCLI-UHFFFAOYSA-N	COC1=CC(=CC=C1O)CC2COC(=O)C2CC3=CC=C(C(=C3)OC)O	InChI=1S/C20H22O6/c1-24-18-9-12(3-5-16(18)21)7-14-11-26-20(23)15(14)8-13-4-6-17(22)19(10-13)25-2/h3-6,9-10,14-15,21-22H,7-8,11H2,1-2H3	0.979	54.681	555	0.35	134	85.22	0.238	0
(-)-pinoresinol	81446-29-9	C20455		12309636	67245	FDB001440		C20H22O6	358.386	AFC000459	HGXBRUKMWQGOIE-UHFFFAOYSA-N	COC1=CC(=CC=C1O)C2C3COC(C4=CC=C(C(=C4)OC)O)C3CO2	InChI=1S/C20H22O6/c1-23-17-7-11(3-5-15(17)21)19-13-9-26-20(14(13)10-25-19)12-4-6-16(22)18(8-12)24-2/h3-8,13-14,19-22H,9-10H2,1-2H3	-0.355	54.681	566	0.4	142	77.38	0.216	0
(-)-secoisolariciresinol	29388-59-8	C18167	HMDB0013692	65373	65004	FDB021314		C20H26O6	362.418	AFC000436	PUETUDUXMCLALY-UHFFFAOYSA-N	COC1=CC(=CC=C1O)CC(CO)C(CC2=CC=C(C(=C2)OC)O)CO	InChI=1S/C20H26O6/c1-25-19-9-13(3-5-17(19)23)7-15(11-21)16(12-22)8-14-4-6-18(24)20(10-14)26-2/h3-6,9-10,15-16,21-24H,7-8,11-12H2,1-2H3	0.304	57.349	540	0.4	126	99.38	0.274	0
(-)-sophorol		C16228		23724668	80395	FDB001446	LMPK12050461	C16H12O6	300.263	AFC001285	FAPWSAQOVOBPCP-UHFFFAOYSA-N	C1=C(C=C2C(=C1)C(=O)C(CO2)C3=C(C=C4C(=C3)OCO4)O)O	InChI=1S/C16H12O6/c17-8-1-2-9-13(3-8)20-6-11(16(9)19)10-4-14-15(5-12(10)18)22-7-21-14/h1-5,11,17-18H,6-7H2	-0.905	40.974	416	0.188	124	85.22	0.284	0
(-)-ureidoglycolate		C00603	HMDB0001005	23615273	57296	FDB022364		[C3H5N2O4]-	133.083	AFC001278	NWZYYCVIOKVTII-UHFFFAOYSA-M	C(C(=O)[O-])(NC(=O)N)O	InChI=1S/C3H6N2O4/c4-3(9)5-1(6)2(7)8/h1,6H,(H,7,8)(H3,4,5,9)/p-1	-2.184	14.022	63	0.333	36	115.48	0.868	0
(+)-7-epi-jasmonoyl-CoA				126961028		FDB030948		[C33H48N7O18P3S]4-	955.759	AFC001527	WQKKCPPNDKSAIU-UHFFFAOYSA-J	CCC=CCC1C(CCC1=O)CC(=O)SCCNC(=O)CCNC(=O)C(C(C)(C)COP(=O)([O-])OP(=O)([O-])OCC2C(C(C(N3C=NC4=C3N=CN=C4N)O2)O)OP(=O)([O-])[O-])O	InChI=1S/C33H52N7O18P3S/c1-4-5-6-7-20-19(8-9-21(20)41)14-24(43)62-13-12-35-23(42)10-11-36-31(46)28(45)33(2,3)16-55-61(52,53)58-60(50,51)54-15-22-27(57-59(47,48)49)26(44)32(56-22)40-18-39-25-29(34)37-17-38-30(25)40/h5-6,17-20,22,26-28,32,44-45H,4,7-16H2,1-3H3,(H,35,42)(H,36,46)(H,50,51)(H,52,53)(H2,34,37,38)(H2,47,48,49)/p-4	-4.555	126.012	3442	0.667	320	443.47	0.464	3
(+)-7-iso-jasmonate		C16317		7251182	136179	FDB030070		[C12H17O3]-	209.262	AFC001125	ZNJFBWYDHIGLCU-UHFFFAOYSA-M	CCC=CCC1C(CCC1=O)CC(=O)[O-]	InChI=1S/C12H18O3/c1-2-3-4-5-10-9(8-12(14)15)6-7-11(10)13/h3-4,9-10H,2,5-8H2,1H3,(H,14,15)/p-1	1.288	34.861	203	0.667	68	57.2	0.274	0
(+)-alpha-barbatene		C19740		14037349	61690			C15H24	204.352	AFC001216	RMKQBFUAKZOVPQ-UHFFFAOYSA-N	CC1=CCC2(C)CC1C3(C)CCCC23C	InChI=1S/C15H24/c1-11-6-9-13(2)10-12(11)14(3)7-5-8-15(13,14)4/h6,12H,5,7-10H2,1-4H3	4.078	42.403	138	0.867	94	0	0	1
(+)-aviprin I	2643-85-8			17536	69829	FDB004979		C16H16O6	304.295	AFC000374	PEWFWDOPJISUOK-UHFFFAOYSA-N	CC(C)(C(COC1=C2C=CC(=O)OC2=CC3=C1C=CO3)O)O	InChI=1S/C16H16O6/c1-16(2,19)13(17)8-21-15-9-3-4-14(18)22-12(9)7-11-10(15)5-6-20-11/h3-7,13,17,19H,8H2,1-2H3	-0.678	43.641	363	0.313	120	85.22	0.28	0
(+)-beta-barbatene	39863-73-5			14109421				C15H24	204.352	AFC001219	RTONMYLSQISFQA-UHFFFAOYSA-N	C=C1CCC2(C)CC1C3(C)CCCC23C	InChI=1S/C15H24/c1-11-6-9-13(2)10-12(11)14(3)7-5-8-15(13,14)4/h12H,1,5-10H2,2-4H3	4.132	42.403	138	0.867	94	0	0	1
(+)-beta-chamigrene		C19908		12302844	61746	FDB005917		C15H24	204.352	AFC001195	WLNGPDPILFYWKF-UHFFFAOYSA-N	CC1=CCC2(CC1)C(=C)CCCC2(C)C	InChI=1S/C15H24/c1-12-7-10-15(11-8-12)13(2)6-5-9-14(15,3)4/h7H,2,5-6,8-11H2,1,3-4H3	4.708	42.403	168	0.733	82	0	0	1
(+)-lariciresinol	27003-73-2	C10646		332427	67246	FDB012578		C20H24O6	360.402	AFC000631	MHXCIKYXNYCMHY-UHFFFAOYSA-N	COC1=CC(=CC=C1O)CC2COC(C3=CC=C(C(=C3)OC)O)C2CO	InChI=1S/C20H24O6/c1-24-18-8-12(3-5-16(18)22)7-14-11-26-20(15(14)10-21)13-4-6-17(23)19(9-13)25-2/h3-6,8-9,14-15,20-23H,7,10-11H2,1-2H3	-0.026	56.015	553	0.4	134	88.38	0.245	0
(+)-pinoresinol	487-36-5	C05366		73399	40			C20H22O6	358.386	AFC000459	HGXBRUKMWQGOIE-UHFFFAOYSA-N	COC1=CC(=CC=C1O)C2C3COC(C4=CC=C(C(=C4)OC)O)C3CO2	InChI=1S/C20H22O6/c1-23-17-7-11(3-5-15(17)21)19-13-9-26-20(14(13)10-25-19)12-4-6-16(22)18(8-12)24-2/h3-8,13-14,19-22H,9-10H2,1-2H3	-0.355	54.681	566	0.4	142	77.38	0.216	0
(+)-secoisolariciresinol	145265-02-7	C20456		6336781	67247	FDB001441		C20H26O6	362.418	AFC000436	PUETUDUXMCLALY-UHFFFAOYSA-N	COC1=CC(=CC=C1O)CC(CO)C(CC2=CC=C(C(=C2)OC)O)CO	InChI=1S/C20H26O6/c1-25-19-9-13(3-5-17(19)23)7-15(11-21)16(12-22)8-14-4-6-18(24)20(10-14)26-2/h3-6,9-10,15-16,21-24H,7-8,11-12H2,1-2H3	0.304	57.349	540	0.4	126	99.38	0.274	0
(+)-taxifolin(1-)	480-18-2	C01617	HMDB0125371	25244891	58329	FDB002749		[C15H11O7]-	303.244	AFC001342	CXQWRCVTCMQVQX-UHFFFAOYSA-M	C1=C(C=C(C(=C1)O)O)C2C(C(=O)C3=C(C=C(C=C3[O-])O)O2)O	InChI=1S/C15H12O7/c16-7-4-10(19)12-11(5-7)22-15(14(21)13(12)20)6-1-2-8(17)9(18)3-6/h1-5,14-19,21H/p-1	-1.94	39.349	368	0.133	120	130.28	0.43	0
(+)-thujopsene	470-40-6	C20724		11401461	61737	FDB005932		C15H24	204.352	AFC001163	WXQGPFZDVCRBME-UHFFFAOYSA-N	CC1=CCC2(C)CCCC(C)(C)C32CC13	InChI=1S/C15H24/c1-11-6-9-14(4)8-5-7-13(2,3)15(14)10-12(11)15/h6,12H,5,7-10H2,1-4H3	4.078	42.403	150	0.867	94	0	0	1
(1R,2R,3aS,3bS,9aR,9bR,11aR)-2-hydroxy-3a,6,6,9b,11a-pentamethyl-8-{[(2S,3R,4S,5S,6R)-3,4,5-trihydroxy-6-(hydroxymethyl)oxan-2-yl]oxy}-1-[(2R,3R,4E)-2,3,6-trihydroxy-6-methylhept-4-en-2-yl]-1H,2H,3H,3bH,4H,9aH,11H-cyclopenta[a]phenanthrene-7,10-dione								C36H54O12	678.808	AFC001805	MNDSHGJSXPOSMP-UHFFFAOYSA-N	CC(C)(/C=C/[C@H]([C@@](C)([C@H]1[C@@H](C[C@@]2(C)[C@@H]3CC=C4[C@@H](C=C(C(=O)C4(C)C)O[C@H]5[C@@H]([C@H]([C@@H]([C@@H](CO)O5)O)O)O)[C@]3(C)C(=O)C[C@]12C)O)O)O)O	InChI=1S/C36H54O12/c1-31(2,45)12-11-23(39)36(8,46)28-19(38)14-33(5)22-10-9-17-18(35(22,7)24(40)15-34(28,33)6)13-20(29(44)32(17,3)4)47-30-27(43)26(42)25(41)21(16-37)48-30/h9,11-13,18-19,21-23,25-28,30,37-39,41-43,45-46H,10,14-16H2,1-8H3	-0.623	108.991	1450	0.778	280	214.44	0.316	3
(1R,2R,3aS,3bS,9aR,9bR,11aR)-2-hydroxy-3a,6,6,9b,11a-pentamethyl-8-{[(2S,3R,4S,5S,6R)-3,4,5-trihydroxy-6-(hydroxymethyl)oxan-2-yl]oxy}-1-[(2R,5R)-2,5,6-trihydroxy-6-methyl-3-oxoheptan-2-yl]-1H,2H,3H,3bH,4H,9aH,11H-cyclopenta[a]phenanthrene-7,10-dione								C36H54O13	694.808	AFC001803	XPEAYHKXEWXAKV-UHFFFAOYSA-N	CC1(C)C2=CC[C@H]3[C@]4(C)C[C@H]([C@@H]([C@@]4(C)CC(=O)[C@@]3(C)[C@@H]2C=C(C1=O)O[C@H]5[C@@H]([C@H]([C@@H]([C@@H](CO)O5)O)O)O)[C@](C)(C(=O)C[C@H](C(C)(C)O)O)O)O	InChI=1S/C36H54O13/c1-31(2)16-9-10-21-33(5)13-18(38)28(36(8,47)23(40)12-22(39)32(3,4)46)34(33,6)14-24(41)35(21,7)17(16)11-19(29(31)45)48-30-27(44)26(43)25(42)20(15-37)49-30/h9,11,17-18,20-22,25-28,30,37-39,42-44,46-47H,10,12-15H2,1-8H3	-1.32	109.793	1485	0.806	286	231.51	0.333	3
(1R,2R,3aS,3bS,9aR,9bR,11aR)-2-hydroxy-3a,6,6,9b,11a-pentamethyl-8-{[(2S,3R,4S,5S,6R)-3,4,5-trihydroxy-6-(hydroxymethyl)oxan-2-yl]oxy}-1-[(2R,5S)-2,5,6-trihydroxy-6-methyl-3-oxoheptan-2-yl]-1H,2H,3H,3bH,4H,9aH,11H-cyclopenta[a]phenanthrene-7,10-dione								C36H54O13	694.808	AFC001803	XPEAYHKXEWXAKV-UHFFFAOYSA-N	CC1(C)C2=CC[C@H]3[C@]4(C)C[C@H]([C@@H]([C@@]4(C)CC(=O)[C@@]3(C)[C@@H]2C=C(C1=O)O[C@H]5[C@@H]([C@H]([C@@H]([C@@H](CO)O5)O)O)O)[C@](C)(C(=O)C[C@@H](C(C)(C)O)O)O)O	InChI=1S/C36H54O13/c1-31(2)16-9-10-21-33(5)13-18(38)28(36(8,47)23(40)12-22(39)32(3,4)46)34(33,6)14-24(41)35(21,7)17(16)11-19(29(31)45)48-30-27(44)26(43)25(42)20(15-37)49-30/h9,11,17-18,20-22,25-28,30,37-39,42-44,46-47H,10,12-15H2,1-8H3	-1.32	109.793	1485	0.806	286	231.51	0.333	3
(1R,6R)-6-hydroxy-2-succinylcyclohexa-2,4-diene-1-carboxylate		C05817		25246102	58689	FDB030089		[C11H10O6]2-	238.194	AFC001360	QJYRAJSESKVEAE-UHFFFAOYSA-L	C1=CC(C(C(=C1)C(=O)CCC(=O)[O-])C(=O)[O-])O	InChI=1S/C11H12O6/c12-7(4-5-9(14)15)6-2-1-3-8(13)10(6)11(16)17/h1-3,8,10,13H,4-5H2,(H,14,15)(H,16,17)/p-2	-1.945	30.84	217	0.364	80	117.56	0.494	0
(1S,2R)-1-C-(indol-3-yl)glycerol 3-phosphate		C03506		46878464	58866			[C11H12NO6P]2-	285.19	AFC001410	NQEQTYPJSIEPHW-UHFFFAOYSA-L	C1=CC2=C(C=C1)NC=C2C(C(COP(=O)([O-])[O-])O)O	InChI=1S/C11H14NO6P/c13-10(6-18-19(15,16)17)11(14)8-5-12-9-4-2-1-3-7(8)9/h1-5,10-14H,6H2,(H2,15,16,17)/p-2	-2.856	36.904	307	0.273	98	134.72	0.473	0
(1S,2S,4R,6S,8S,9R,10R,13R,14R)-16-{[(2S,3R,4S,5S,6R)-4,5-dihydroxy-6-(hydroxymethyl)-3-{[(2S,3R,4R,5R,6S)-3,4,5-trihydroxy-6-methyloxan-2-yl]oxy}oxan-2-yl]oxy}-8-hydroxy-2,8,10,13,18,18-hexamethyl-6-(2-methylprop-1-en-1-yl)-5-oxapentacyclo[11.8.0.0¬≤,¬π‚Å∞.0‚Å¥,‚Åπ.0¬π‚Å¥,¬π‚Åπ]henicosa-15,19-diene-12,17-dione								C42H62O14	790.935	AFC001816	UQKQSTXKJGBRSV-UHFFFAOYSA-N	CC(=C[C@@H]1C[C@@](C)([C@H]2[C@@H](C[C@@]3(C)[C@@H]4CC=C5[C@@H](C=C(C(=O)C5(C)C)O[C@H]6[C@@H]([C@H]([C@@H]([C@@H](CO)O6)O)O)O[C@H]7[C@@H]([C@@H]([C@H]([C@H](C)O7)O)O)O)[C@]4(C)C(=O)C[C@]23C)O1)O)C	InChI=1S/C42H62O14/c1-18(2)12-20-14-41(8,51)34-24(53-20)15-39(6)26-11-10-21-22(42(26,9)27(44)16-40(34,39)7)13-23(35(50)38(21,4)5)54-37-33(31(48)29(46)25(17-43)55-37)56-36-32(49)30(47)28(45)19(3)52-36/h10,12-13,19-20,22,24-26,28-34,36-37,43,45-49,51H,11,14-17H2,1-9H3	0.302	126.489	1934	0.81	330	221.9	0.281	3
(1S,2S,4R,6S,8S,9R,10R,13R,14R)-16-{[(2S,3R,4S,5S,6R)-4,5-dihydroxy-6-(hydroxymethyl)-3-{[(2S,3R,4R,5R,6S)-3,4,5-trihydroxy-6-methyloxan-2-yl]oxy}oxan-2-yl]oxy}-8-hydroxy-6-[(1E)-3-hydroxy-2-methylprop-1-en-1-yl]-2,8,10,13,18,18-hexamethyl-5-oxapentacyclo[11.8.0.0¬≤,¬π‚Å∞.0‚Å¥,‚Åπ.0¬π‚Å¥,¬π‚Åπ]henicosa-15,19-diene-12,17-dione								C42H62O15	806.934	AFC001802	BEQDSDZQSKPXIG-UHFFFAOYSA-N	C/C(=C\[C@@H]1C[C@@](C)([C@H]2[C@@H](C[C@@]3(C)[C@@H]4CC=C5[C@@H](C=C(C(=O)C5(C)C)O[C@H]6[C@@H]([C@H]([C@@H]([C@@H](CO)O6)O)O)O[C@H]7[C@@H]([C@@H]([C@H]([C@H](C)O7)O)O)O)[C@]4(C)C(=O)C[C@]23C)O1)O)/CO	InChI=1S/C42H62O15/c1-18(16-43)11-20-13-41(7,52)34-24(54-20)14-39(5)26-10-9-21-22(42(26,8)27(45)15-40(34,39)6)12-23(35(51)38(21,3)4)55-37-33(31(49)29(47)25(17-44)56-37)57-36-32(50)30(48)28(46)19(2)53-36/h9,11-12,19-20,22,24-26,28-34,36-37,43-44,46-50,52H,10,13-17H2,1-8H3	-0.789	127.291	2039	0.81	334	242.13	0.3	3
(1S,2S,4R,6S,9R,10R,11R,14R,15R)-9,17-dihydroxy-6-(2-methoxypropan-2-yl)-2,9,11,14,19,19-hexamethyl-5-oxapentacyclo[12.8.0.0¬≤,¬π¬π.0‚Å¥,¬π‚Å∞.0¬π‚Åµ,¬≤‚Å∞]docosa-16,20-diene-8,13,18-trione								C31H44O7	528.678	AFC001826	KGYOQUPPUIDIOS-UHFFFAOYSA-N	CC1(C)C2=CC[C@H]3[C@]4(C)C[C@@H]5[C@@H]([C@@]4(C)CC(=O)[C@@]3(C)[C@@H]2C=C(C1=O)O)[C@](C)(C(=O)C[C@@H](C(C)(C)OC)O5)O	InChI=1S/C31H44O7/c1-26(2)16-10-11-20-28(5)14-19-24(31(8,36)21(33)13-23(38-19)27(3,4)37-9)29(28,6)15-22(34)30(20,7)17(16)12-18(32)25(26)35/h10,12,17,19-20,23-24,32,36H,11,13-15H2,1-9H3	1.946	89.513	867	0.774	232	110.13	0.208	1
(1S,2S,4R,6S,9R,10R,11R,14R,15R)-9-hydroxy-2,9,11,14,19,19-hexamethyl-6-(prop-1-en-2-yl)-17-{[(2S,3R,4S,5S,6R)-3,4,5-trihydroxy-6-(hydroxymethyl)oxan-2-yl]oxy}-5-oxapentacyclo[12.8.0.0¬≤,¬π¬π.0‚Å¥,¬π‚Å∞.0¬π‚Åµ,¬≤‚Å∞]docosa-16,20-diene-8,13,18-trione								C36H50O11	658.777	AFC001807	WXOQVIJCYNJZTP-UHFFFAOYSA-N	C=C(C)[C@@H]1CC(=O)[C@@](C)([C@H]2[C@@H](C[C@@]3(C)[C@@H]4CC=C5[C@@H](C=C(C(=O)C5(C)C)O[C@H]6[C@@H]([C@H]([C@@H]([C@@H](CO)O6)O)O)O)[C@]4(C)C(=O)C[C@]23C)O1)O	InChI=1S/C36H50O11/c1-16(2)19-12-24(38)36(8,44)29-21(45-19)13-33(5)23-10-9-17-18(35(23,7)25(39)14-34(29,33)6)11-20(30(43)32(17,3)4)46-31-28(42)27(41)26(40)22(15-37)47-31/h9,11,18-19,21-23,26-29,31,37,40-42,44H,1,10,12-15H2,2-8H3	0.467	105.522	1329	0.75	280	180.05	0.273	2
(1S,2S,4R,6S,9R,10R,11R,14R,15R)-9-hydroxy-6-(2-methoxypropan-2-yl)-2,9,11,14,19,19-hexamethyl-17-{[(2S,3R,4S,5S,6R)-3,4,5-trihydroxy-6-(hydroxymethyl)oxan-2-yl]oxy}-5-oxapentacyclo[12.8.0.0¬≤,¬π¬π.0‚Å¥,¬π‚Å∞.0¬π‚Åµ,¬≤‚Å∞]docosa-16,20-diene-8,13,18-trione								C37H54O12	690.819	AFC001823	IEGSGKOVOHXXNB-UHFFFAOYSA-N	CC1(C)C2=CC[C@H]3[C@]4(C)C[C@@H]5[C@@H]([C@@]4(C)CC(=O)[C@@]3(C)[C@@H]2C=C(C1=O)O[C@H]6[C@@H]([C@H]([C@@H]([C@@H](CO)O6)O)O)O)[C@](C)(C(=O)C[C@@H](C(C)(C)OC)O5)O	InChI=1S/C37H54O12/c1-32(2)17-10-11-22-34(5)14-20-29(37(8,45)23(39)13-25(47-20)33(3,4)46-9)35(34,6)15-24(40)36(22,7)18(17)12-19(30(32)44)48-31-28(43)27(42)26(41)21(16-38)49-31/h10,12,18,20-22,25-29,31,38,41-43,45H,11,13-16H2,1-9H3	-0.145	110.751	1443	0.811	292	189.28	0.274	2
(1S,2S,4R,6S,9S,10R,11R,14R,15R)-6-(2-methoxypropan-2-yl)-2,9,11,14,19,19-hexamethyl-17-{[(2S,3R,4S,5S,6R)-3,4,5-trihydroxy-6-(hydroxymethyl)oxan-2-yl]oxy}-5-oxapentacyclo[12.8.0.0¬≤,¬π¬π.0‚Å¥,¬π‚Å∞.0¬π‚Åµ,¬≤‚Å∞]docosa-16,20-diene-8,13,18-trione								C37H54O11	674.819	AFC001815	CJXFVEKXQMCNNX-UHFFFAOYSA-N	C[C@@H]1C(=O)C[C@@H](C(C)(C)OC)O[C@@H]2C[C@@]3(C)[C@@H]4CC=C5[C@@H](C=C(C(=O)C5(C)C)O[C@H]6[C@@H]([C@H]([C@@H]([C@@H](CO)O6)O)O)O)[C@]4(C)C(=O)C[C@]3(C)[C@@H]12	InChI=1S/C37H54O11/c1-17-20(39)13-26(34(4,5)45-9)46-22-14-35(6)24-11-10-18-19(37(24,8)25(40)15-36(35,7)27(17)22)12-21(31(44)33(18,2)3)47-32-30(43)29(42)28(41)23(16-38)48-32/h10,12,17,19,22-24,26-30,32,38,41-43H,11,13-16H2,1-9H3	0.788	109.949	1414	0.811	284	169.05	0.251	2
(2E)-4-hydroxy-3-methylbut-2-enyl diphosphate		C11811		5281976;21597501	15664;128753		LMPR01010009	[C5H9O8P2]3-	259.068	AFC001261	MDSIZRKJVDMQOQ-UHFFFAOYSA-K	CC(=CCOP(=O)([O-])OP(=O)([O-])[O-])CO	InChI=1S/C5H12O8P2/c1-5(4-6)2-3-12-15(10,11)13-14(7,8)9/h2,6H,3-4H2,1H3,(H,10,11)(H2,7,8,9)/p-3	-2.605	28.477	197	0.6	68	161.63	0.624	0
(2E,6E)-farnesal	19317-11-4	C03461	HMDB0060356	5280598	15894	FDB014515	LMPR0103010012	C15H24O	220.351	AFC000900	YHRUHBBTQZKMEX-UHFFFAOYSA-N	CC(=CCCC(=CCCC(=CC=O)C)C)C	InChI=1S/C15H24O/c1-13(2)7-5-8-14(3)9-6-10-15(4)11-12-16/h7,9,11-12H,5-6,8,10H2,1-4H3	5.017	43.205	273	0.533	64	17.07	0.078	0
(2E,6E)-farnesol	106-28-5	C01126	HMDB0004305	445070	16619	FDB014891	LMPR0103010001	C15H26O	222.367	AFC000769	CRDAMVZIKSXKFV-UHFFFAOYSA-N	CC(=CCCC(=CCCC(=CCO)C)C)C	InChI=1S/C15H26O/c1-13(2)7-5-8-14(3)9-6-10-15(4)11-12-16/h7,9,11,16H,5-6,8,10,12H2,1-4H3	4.761	44.539	273	0.6	64	20.23	0.091	0
(2E,6E)-farnesyl diphosphate	13058-04-3	C00448	HMDB0000961	15983959	175763	FDB030108	LMPR0103010002	[C15H25O7P2]3-	379.303	AFC001239	VWFJDQUYCIWHTN-UHFFFAOYSA-K	CC(=CCCC(=CCCC(=CCOP(=O)([O-])OP(=O)([O-])[O-])C)C)C	InChI=1S/C15H28O7P2/c1-13(2)7-5-8-14(3)9-6-10-15(4)11-12-21-24(19,20)22-23(16,17)18/h7,9,11H,5-6,8,10,12H2,1-4H3,(H,19,20)(H2,16,17,18)/p-3	2.139	55.944	573	0.6	108	141.4	0.373	1
(2E,6Z)-nona-2,6-dien-1-ol	5820-89-3;28069-72-9			5320191;5362833	142615	FDB017291		C9H16O	140.223	AFC001020	AMXYRHBJZOVHOL-UHFFFAOYSA-N	CCC=CCCC=CCO	InChI=1S/C9H16O/c1-2-3-4-5-6-7-8-9-10/h3-4,7-8,10H,2,5-6,9H2,1H3	2.498	27.311	122	0.556	34	20.23	0.144	0
(2R)-2-hydroxy-2-methylbutanenitrile	122045-29-8	C18796	HMDB0060309	12650900	60908	FDB030109		C5H9NO	99.1313	AFC001201	VMEHOTODTPXCKT-UHFFFAOYSA-N	CCC(C)(C#N)O	InChI=1S/C5H9NO/c1-3-5(2,7)4-6/h7H,3H2,1-2H3	0.692	16.703	34	0.8	28	44.02	0.444	0
(2R)-phospho-3-sulfolactate		C11536		5460422	15597			[C3H3O9PS]4-	246.091	AFC001059	CABHHUMGNFUZCZ-UHFFFAOYSA-J	C(C(C(=O)[O-])OP(=O)([O-])[O-])S(=O)(=O)[O-]	InChI=1S/C3H7O9PS/c4-3(5)2(1-14(9,10)11)12-13(6,7)8/h2H,1H2,(H,4,5)(H2,6,7,8)(H,9,10,11)/p-4	-4.114	21.028	123	0.667	66	187.94	0.764	0
(2R,3aS,3bS,8S,9aR,9bR,11aR)-1-[(2R)-2,6-dihydroxy-6-methyl-3-oxoheptan-2-yl]-2-hydroxy-3a,6,6,9b,11a-pentamethyl-8-{[(2S,3R,4S,5S,6R)-3,4,5-trihydroxy-6-(hydroxymethyl)oxan-2-yl]oxy}-1H,2H,3H,3bH,4H,8H,9H,9aH,11H-cyclopenta[a]phenanthrene-7,10-dione								C36H56O12	680.824	AFC001789	NWOBCRRKTPFKMK-UHFFFAOYSA-N	CC(C)(CCC(=O)[C@@](C)(C1[C@@H](C[C@@]2(C)[C@@H]3CC=C4[C@@H](C[C@@H](C(=O)C4(C)C)O[C@H]5[C@@H]([C@H]([C@@H]([C@@H](CO)O5)O)O)O)[C@]3(C)C(=O)C[C@]12C)O)O)O	InChI=1S/C36H56O12/c1-31(2,45)12-11-23(39)36(8,46)28-19(38)14-33(5)22-10-9-17-18(35(22,7)24(40)15-34(28,33)6)13-20(29(44)32(17,3)4)47-30-27(43)26(42)25(41)21(16-37)48-30/h9,18-22,25-28,30,37-38,41-43,45-46H,10-16H2,1-8H3	-0.238	110.324	1450	0.861	280	211.28	0.311	3
(2R,3R)-pinobanksin	548-82-3	C09826		73202	28103	FDB030110		C15H12O5	272.253	AFC000456	SUYJZKRQHBQNCA-UHFFFAOYSA-N	C1=CC=C(C=C1)C2C(C(=O)C3=C(C=C(C=C3O)O)O2)O	InChI=1S/C15H12O5/c16-9-6-10(17)12-11(7-9)20-15(14(19)13(12)18)8-4-2-1-3-5-8/h1-7,14-17,19H	-0.136	38.412	308	0.133	108	86.99	0.32	0
(2R,3R,4S,5R,6R)-2-(benzyloxy)-6-(hydroxymethyl)oxane-3,4,5-triol				4984739				C13H18O6	270.279	AFC001800	GKHCBYYBLTXYEV-UHFFFAOYSA-N	C1=CC=C(C=C1)CO[C@H]2[C@@H]([C@H]([C@H]([C@@H](CO)O2)O)O)O	InChI=1S/C13H18O6/c14-6-9-10(15)11(16)12(17)13(19-9)18-7-8-4-2-1-3-5-8/h1-5,9-17H,6-7H2	-0.988	39.694	314	0.538	94	99.38	0.368	0
(2R,3R,4S,5R,6R)-2-(hydroxymethyl)-6-[(4-hydroxyphenyl)methoxy]oxane-3,4,5-triol				49871128				C13H18O7	286.278	AFC001799	WGBHVCJJFIVFAL-UHFFFAOYSA-N	C1=C(C=CC(=C1)O)CO[C@H]2[C@@H]([C@H]([C@H]([C@@H](CO)O2)O)O)O	InChI=1S/C13H18O7/c14-5-9-10(16)11(17)12(18)13(20-9)19-6-7-1-3-8(15)4-2-7/h1-4,9-18H,5-6H2	-1.551	40.496	360	0.538	100	119.61	0.418	0
(2R,3R,4S,5R,6S)-2-(hydroxymethyl)-6-[4-(hydroxymethyl)phenoxy]oxane-3,4,5-triol				3645183				C13H18O7	286.278	AFC001798	PUQSUZTXKPLAPR-UHFFFAOYSA-N	C1=C(C=CC(=C1)O[C@H]2[C@@H]([C@H]([C@H]([C@@H](CO)O2)O)O)O)CO	InChI=1S/C13H18O7/c14-5-7-1-3-8(4-2-7)19-13-12(18)11(17)10(16)9(6-15)20-13/h1-4,9-18H,5-6H2	-1.895	40.496	354	0.538	100	119.61	0.418	0
(2R,3S)-3-isopropylmalate		C04411	HMDB0012156	6857402	35121	FDB030113		[C7H10O5]2-	174.152	AFC001113	RNQHMTFBUSSBJQ-UHFFFAOYSA-L	CC(C)C(C(C(=O)[O-])O)C(=O)[O-]	InChI=1S/C7H12O5/c1-3(2)4(6(9)10)5(8)7(11)12/h3-5,8H,1-2H3,(H,9,10)(H,11,12)/p-2	-1.141	22.998	88	0.714	52	100.49	0.577	0
(2R,3S,4S,5R,6R)-2-(hydroxymethyl)-6-[(4-hydroxyphenyl)methoxy]oxane-3,4,5-triol				49871127				C13H18O7	286.278	AFC001799	WGBHVCJJFIVFAL-UHFFFAOYSA-N	C1=C(C=CC(=C1)O)CO[C@H]2[C@@H]([C@H]([C@@H]([C@@H](CO)O2)O)O)O	InChI=1S/C13H18O7/c14-5-9-10(16)11(17)12(18)13(20-9)19-6-7-1-3-8(15)4-2-7/h1-4,9-18H,5-6H2	-1.551	40.496	360	0.538	100	119.61	0.418	0
(2R,4S)-2-methyl-2,3,3,4-tetrahydroxytetrahydrofuran		C21382		448719	44800			C5H10O5	150.13	AFC000794	BVIYGXUQVXBHQS-UHFFFAOYSA-N	CC1(C(C(CO1)O)(O)O)O	InChI=1S/C5H10O5/c1-4(7)5(8,9)3(6)2-10-4/h3,6-9H,2H2,1H3	-1.943	19.478	59	1	54	90.15	0.601	0
(2R,4S)-2-methyl-2,4-dihydroxydihydrofuran-3-one				44123557	71316			C5H8O4	132.115	AFC001149	CCVJVKWZZMMBHB-UHFFFAOYSA-N	CC1(C(=O)C(CO1)O)O	InChI=1S/C5H8O4/c1-5(8)4(7)3(6)2-9-5/h3,6,8H,2H2,1H3	-1.306	17.342	54	0.8	46	66.76	0.506	0
(2S)-2-amino-3-(6-benzyl-2-imino-1H-purin-9-yl)propanoic acid								C15H16N6O2	312.327	AFC001788	AAAXGCLPRZBHJL-UHFFFAOYSA-N	C1=CC=C(C=C1)CC2=C3C(=NC(=N)N2)N(C[C@@H](C(=O)O)N)C=N3	InChI=1S/C15H16N6O2/c16-10(14(22)23)7-21-8-18-12-11(19-15(17)20-13(12)21)6-9-4-2-1-3-5-9/h1-5,8,10H,6-7,16H2,(H,22,23)(H2,17,19,20)	-0.602	45.273	442	0.2	120	127.16	0.407	0
(2S)-2-amino-5-oxopentanoic acid	496-92-4	C01165		193305	17232			C5H9NO3	131.13	AFC000615	KABXUUFDPUOJMW-UHFFFAOYSA-N	C(CC(C(=O)O)N)C=O	InChI=1S/C5H9NO3/c6-4(5(8)9)2-1-3-7/h3-4H,1-2,6H2,(H,8,9)	-0.877	18.307	74	0.6	34	80.39	0.613	0
(2S)-2-hydroxybutanedioic acid	97-67-6	C00149	HMDB0000156	222656	30797	FDB012047		C4H6O5	134.088	AFC000074	BJEPYKJPYRNKOW-UHFFFAOYSA-N	C(C(C(=O)O)O)C(=O)O	InChI=1S/C4H6O5/c5-2(4(8)9)1-3(6)7/h2,5H,1H2,(H,6,7)(H,8,9)	-0.956	15.051	63	0.5	36	94.83	0.708	0
(2S)-2-isopropyl-3-oxosuccinate		C04236	HMDB0012149	5462259	1467	FDB030114		C7H10O5	174.152	AFC001069	HIIZAGQWABAMRR-UHFFFAOYSA-N	CC(C)C(C(=O)C(=O)O)C(=O)O	InChI=1S/C7H10O5/c1-3(2)4(6(9)10)5(8)7(11)12/h3-4H,1-2H3,(H,9,10)(H,11,12)	0.462	22.998	88	0.571	52	91.67	0.527	0
(2S)-2-isopropylmalate	49601-06-1	C02504	HMDB0000402	5280523	35129	FDB030115	LMFA01170083	C7H12O5	176.167	AFC000888	BITYXLXUCSKTJS-UHFFFAOYSA-N	CC(C)C(CC(=O)O)(C(=O)O)O	InChI=1S/C7H12O5/c1-4(2)7(12,6(10)11)3-5(8)9/h4,12H,3H2,1-2H3,(H,8,9)(H,10,11)	0.092	24.332	88	0.714	54	94.83	0.539	0
(2S)-6-amino-2-formamidohexanamide		C00391	HMDB0059607	25244460		FDB005763		C7H15N3O2	173.213	AFC001334	DKPYGQKMNSGPGT-UHFFFAOYSA-N	C(CCN)CC(C(=O)N)NC=O	InChI=1S/C7H15N3O2/c8-4-2-1-3-6(7(9)12)10-5-11/h5-6H,1-4,8H2,(H2,9,12)(H,10,11)	-1.339	27.226	133	0.714	46	98.21	0.567	0
(2S)-pinocembrin	480-39-7	C09827	HMDB0141337	68071	28157	FDB030117	LMPK12140214	C15H12O4	256.254	AFC000443	URFCJEUYXNAHFI-UHFFFAOYSA-N	C1=CC=C(C=C1)C2CC(=O)C3=C(C=C(C=C3O)O)O2	InChI=1S/C15H12O4/c16-10-6-11(17)15-12(18)8-13(19-14(15)7-10)9-4-2-1-3-5-9/h1-7,13,16-17H,8H2	0.409	37.61	295	0.133	102	66.76	0.261	0
(2S,4aS,6aS,8aR,12aS,14aS,14bR)-10-hydroxy-2,4a,6a,9,9,12a,14a-heptamethyl-1,3,4,5,6,7,8,8a,10,11,12,13,14,14b-tetradecahydropicene-2-carboxylic acid								C30H48O3	456.701	AFC000568	BHVJSLPLFOAMEV-UHFFFAOYSA-N	CC1(C)[C@@H]2CCC3=C(CC[C@@]4(C)[C@@H]5C[C@](C)(CC[C@]5(C)CC[C@]34C)C(=O)O)[C@@]2(C)CCC1O	InChI=1S/C30H48O3/c1-25(2)21-9-8-20-19(28(21,5)12-11-23(25)31)10-13-30(7)22-18-27(4,24(32)33)15-14-26(22,3)16-17-29(20,30)6/h21-23,31H,8-18H2,1-7H3,(H,32,33)	6.617	87.212	715	0.9	204	57.53	0.126	1
(2S,4S)-2-methyl-2,3,3,4-tetrahydroxytetrahydrofuran				44123585				C5H10O5	150.13	AFC000794	BVIYGXUQVXBHQS-UHFFFAOYSA-N	CC1(C(C(CO1)O)(O)O)O	InChI=1S/C5H10O5/c1-4(7)5(8,9)3(6)2-10-4/h3,6-9H,2H2,1H3	-1.943	19.478	59	1	54	90.15	0.601	0
(2S,4S)-2-methyl-2,4-dihydroxydihydrofuran-3-one	406681-75-2			10240835				C5H8O4	132.115	AFC001149	CCVJVKWZZMMBHB-UHFFFAOYSA-N	CC1(C(=O)C(CO1)O)O	InChI=1S/C5H8O4/c1-5(8)4(7)3(6)2-9-5/h3,6,8H,2H2,1H3	-1.306	17.342	54	0.8	46	66.76	0.506	0
(2S,6S)-2,6-diaminoheptanedioic acid	14289-34-0	C00666	HMDB0001370	439283	16026	FDB030951	LMFA01170102	C7H14N2O4	190.197	AFC000842	GMKMEZVLHJARHF-UHFFFAOYSA-N	C(CC(C(=O)O)N)CC(C(=O)O)N	InChI=1S/C7H14N2O4/c8-4(6(10)11)2-1-3-5(9)7(12)13/h4-5H,1-3,8-9H2,(H,10,11)(H,12,13)	-0.982	27.063	152	0.714	54	126.64	0.666	0
(2Z)-2-(5-oxofuran-2-ylidene)acetate	73237-79-3	C04431	HMDB0060459	9543216	18371			[C6H3O4]-	139.086	AFC001130	AYFXPGXAZMFWNH-UHFFFAOYSA-M	C1=CC(=O)OC1=CC(=O)[O-]	InChI=1S/C6H4O4/c7-5(8)3-4-1-2-6(9)10-4/h1-3H,(H,7,8)/p-1	-0.52	15.768	91	0	46	66.43	0.478	0
(3E,6R)-6-[(1R,2R,3aS,3bS,4S,9aR,9bS,11aR)-2,4-dihydroxy-3a,6,6,9b,11a-pentamethyl-7,10-dioxo-8-{[(2S,3R,4S,5S,6R)-3,4,5-trihydroxy-6-(hydroxymethyl)oxan-2-yl]oxy}-1H,2H,3H,3bH,4H,9aH,11H-cyclopenta[a]phenanthren-1-yl]-6-hydroxy-2-methyl-5-oxohept-3-en-2-yl acetate								C38H54O14	734.828	AFC001801	VJTYFWONTVLZJR-UHFFFAOYSA-N	CC(=O)OC(C)(C)/C=C/C(=O)[C@@](C)([C@H]1[C@@H](C[C@@]2(C)[C@@H]3[C@H](C=C4[C@@H](C=C(C(=O)C4(C)C)O[C@H]5[C@@H]([C@H]([C@@H]([C@@H](CO)O5)O)O)O)[C@]3(C)C(=O)C[C@]12C)O)O)O	InChI=1S/C38H54O14/c1-17(40)52-33(2,3)11-10-24(43)38(9,49)30-21(42)14-35(6)29-20(41)12-18-19(37(29,8)25(44)15-36(30,35)7)13-22(31(48)34(18,4)5)50-32-28(47)27(46)26(45)23(16-39)51-32/h10-13,19-21,23,26-30,32,39,41-42,45-47,49H,14-16H2,1-9H3	-1.031	114.115	1711	0.737	300	237.58	0.324	3
(3E,6S)-6-[(1R,2R,3aS,3bS,4R,9aR,9bS,11aR)-2,4-dihydroxy-3a,6,6,9b,11a-pentamethyl-7,10-dioxo-8-{[(2S,3R,4S,5S,6R)-3,4,5-trihydroxy-6-(hydroxymethyl)oxan-2-yl]oxy}-1H,2H,3H,3bH,4H,9aH,11H-cyclopenta[a]phenanthren-1-yl]-6-hydroxy-2-methyl-5-oxohept-3-en-2-yl acetate								C38H54O14	734.828	AFC001801	VJTYFWONTVLZJR-UHFFFAOYSA-N	CC(=O)OC(C)(C)/C=C/C(=O)[C@](C)([C@H]1[C@@H](C[C@@]2(C)[C@@H]3[C@@H](C=C4[C@@H](C=C(C(=O)C4(C)C)O[C@H]5[C@@H]([C@H]([C@@H]([C@@H](CO)O5)O)O)O)[C@]3(C)C(=O)C[C@]12C)O)O)O	InChI=1S/C38H54O14/c1-17(40)52-33(2,3)11-10-24(43)38(9,49)30-21(42)14-35(6)29-20(41)12-18-19(37(29,8)25(44)15-36(30,35)7)13-22(31(48)34(18,4)5)50-32-28(47)27(46)26(45)23(16-39)51-32/h10-13,19-21,23,26-30,32,39,41-42,45-47,49H,14-16H2,1-9H3	-1.031	114.115	1711	0.737	300	237.58	0.324	3
(3R)-3-hydroxy-2-oxo-4-phosphonooxybutanoate		C06054	HMDB0006801	21145142	27951	FDB024087		C4H7O8P	214.068	AFC001258	MZJFVXDTNBHTKZ-UHFFFAOYSA-N	C(C(C(=O)C(=O)O)O)OP(=O)(O)O	InChI=1S/C4H7O8P/c5-2(3(6)4(7)8)1-12-13(9,10)11/h2,5H,1H2,(H,7,8)(H2,9,10,11)	-2.273	21.754	133	0.5	58	151.17	0.706	0
(3R)-3-hydroxy-3-methyl-5-(phosphonooxy)pentanoic acid	73566-35-5	C01107	HMDB0001343	439400	17436	FDB031001	LMFA01050415	C6H13O7P	228.137	AFC000672	OKZYCXHTTZZYSK-UHFFFAOYSA-N	CC(CCOP(=O)(O)O)(CC(=O)O)O	InChI=1S/C6H13O7P/c1-6(9,4-5(7)8)2-3-13-14(10,11)12/h9H,2-4H2,1H3,(H,7,8)(H2,10,11,12)	-1.707	28.472	163	0.833	64	134.1	0.588	0
(3R)-linalool	126-91-0	C11388	HMDB0036102	443158	28	FDB014941	LMPR0102010013	C10H18O	154.25	AFC000263	CDOSHBSSFJOMGT-UHFFFAOYSA-N	C=CC(C)(CCC=C(C)C)O	InChI=1S/C10H18O/c1-5-10(4,11)8-6-7-9(2)3/h5,7,11H,1,6,8H2,2-4H3	2.735	30.404	109	0.6	46	20.23	0.131	0
(3R,4S)-3-amino-4-methylhexanoic acid				16211048				C7H15NO2	145.2	AFC001851	JHEDYGILOIBOTL-UHFFFAOYSA-N	CC[C@H](C)[C@@H](CC(=O)O)N	InChI=1S/C7H15NO2/c1-3-5(2)6(8)4-7(9)10/h5-6H,3-4,8H2,1-2H3,(H,9,10)	0.733	25.026	81	0.857	40	63.32	0.436	0
(3S)-2,3-epoxy-2,3-dihydrosqualene	54910-48-4	C01054	HMDB0059621	5459811	15441	FDB022476	LMPR0106010010	C30H50O	426.719	AFC001031	QYIMSPSDBYKPPY-UHFFFAOYSA-N	CC(=CCCC(=CCCC(=CCCC=C(C)CCC=C(C)CCC1C(C)(C)O1)C)C)C	InChI=1S/C30H50O/c1-24(2)14-11-17-27(5)20-12-18-25(3)15-9-10-16-26(4)19-13-21-28(6)22-23-29-30(7,8)31-29/h14-16,20-21,29H,9-13,17-19,22-23H2,1-8H3	10.03	86.942	1103	0.667	142	12.53	0.029	2
(3S)-linalool	126-90-9	C11389	HMDB0036101	67179	98	FDB014942		C10H18O	154.25	AFC000263	CDOSHBSSFJOMGT-UHFFFAOYSA-N	C=CC(C)(CCC=C(C)C)O	InChI=1S/C10H18O/c1-5-10(4,11)8-6-7-9(2)3/h5,7,11H,1,6,8H2,2-4H3	2.735	30.404	109	0.6	46	20.23	0.131	0
(3S,5R,6R)-3,5-dihydroxy-6,7-didehydro-5,6-dihydro-12'-apo-beta-caroten-12'-al		C14044		5282319	34596	FDB030120	LMPR01070293	C25H34O3	382.537	AFC000965	MFDUGTOOXGORRX-UHFFFAOYSA-N	CC(=CC=CC=C(C)C=O)C=CC=C(C)C=C=C1C(C)(C)CC(CC1(C)O)O	InChI=1S/C25H34O3/c1-19(10-7-8-11-21(3)18-26)12-9-13-20(2)14-15-23-24(4,5)16-22(27)17-25(23,6)28/h7-14,18,22,27-28H,16-17H2,1-6H3	4.535	69.077	782	0.44	134	57.53	0.151	1
(3S,5R,6S)-5,6-epoxy-3-hydroxy-5,6-dihydro-12'-apo-beta-caroten-12'-al		C14045		5282320	34597	FDB030121	LMPR01070294	C25H34O3	382.537	AFC000966	CAXVJDRXJFKYQP-UHFFFAOYSA-N	CC(=CC=CC=C(C)C=O)C=CC=C(C)C=CC12C(C)(C)CC(CC1(C)O2)O	InChI=1S/C25H34O3/c1-19(10-7-8-11-21(3)18-26)12-9-13-20(2)14-15-25-23(4,5)16-22(27)17-24(25,6)28-25/h7-15,18,22,27H,16-17H2,1-6H3	4.456	69.077	810	0.48	144	49.83	0.13	1
(3Z)-phytochromobilin		C05913		5280865	26116	FDB030122		C33H36N4O6	584.663	AFC000919	LXWZWRRIEITWMN-UHFFFAOYSA-N	CC=C1C(C)C(=O)NC1=CC2=C(C)C(=C(C=C3C(=C(C)C(=CC4=NC(=O)C(=C4C)C=C)N3)CCC(=O)O)N2)CCC(=O)O	InChI=1S/C33H36N4O6/c1-7-20-19(6)32(42)37-27(20)14-25-18(5)23(10-12-31(40)41)29(35-25)15-28-22(9-11-30(38)39)17(4)24(34-28)13-26-16(3)21(8-2)33(43)36-26/h7-8,13-15,19,34-35H,2,9-12H2,1,3-6H3,(H,37,42)(H,38,39)(H,40,41)	2.606	91.297	1203	0.303	226	157.19	0.269	1
(3Z,6Z)-3,6-nonadien-1-ol	53046-97-2		HMDB0030957	6434541		FDB002936	LMFA05000136	C9H16O	140.223	AFC001094	PICGPEBVZGCYBV-UHFFFAOYSA-N	CCC=CCC=CCCO	InChI=1S/C9H16O/c1-2-3-4-5-6-7-8-9-10/h3-4,6-7,10H,2,5,8-9H2,1H3	2.363	27.311	122	0.556	34	20.23	0.144	0
(4E)-5,9-dimethyldeca-4,8-dien-2-one	7733-91-7			6381418				C12H20O	180.287	AFC001085	OJERVTGBPHDZJG-UHFFFAOYSA-N	CC(=CCCC(=CCC(=O)C)C)C	InChI=1S/C12H20O/c1-10(2)6-5-7-11(3)8-9-12(4)13/h6,8H,5,7,9H2,1-4H3	3.164	35.258	167	0.583	52	17.07	0.095	0
(4-hydroxyphenyl)acetaldehyde	7339-87-9	C03765	HMDB0003767	440113	15621	FDB030123		C8H8O2	136.148	AFC000705	IPRPPFIAVHPVJH-UHFFFAOYSA-N	C1=C(C=CC(=C1)O)CC=O	InChI=1S/C8H8O2/c9-6-5-7-1-3-8(10)4-2-7/h1-4,6,10H,5H2	0.487	21.018	102	0.125	44	37.3	0.274	0
(4-hydroxyphenyl)methanol 4-Œ≤-d-apiofuranosyl-O-Œ≤-d-glucopyranoside								C18H26O11	418.393	AFC001606	TXMLRXCCKUXUSF-UHFFFAOYSA-N	C1=C(C=CC(=C1)O)CO[C@H]2[C@@H]([C@H]([C@]([C@@H](CO)O2)([C@H]3[C@@H](C(CO)(CO3)O)O)O)O)O	InChI=1S/C18H26O11/c19-5-11-18(26,15-14(24)17(25,7-20)8-28-15)13(23)12(22)16(29-11)27-6-9-1-3-10(21)4-2-9/h1-4,11-16,19-26H,5-8H2	-3.683	57.839	688	0.667	156	189.53	0.453	2
(6E)-8-hydroxygeranial		C20222		13895495	64238			C10H16O2	168.233	AFC001211	WTWGQWLNUNSMGM-UHFFFAOYSA-N	CC(=CC=O)CCC=C(C)CO	InChI=1S/C10H16O2/c1-9(6-7-11)4-3-5-10(2)8-12/h5-7,12H,3-4,8H2,1-2H3	2.1	29.873	150	0.5	46	37.3	0.222	0
(6E)-8-oxogeranial		C17622		11073781	64239			C10H14O2	166.217	AFC001158	GRHWFPUCRVCMRY-UHFFFAOYSA-N	CC(=CC=O)CCC=C(C)C=O	InChI=1S/C10H14O2/c1-9(6-7-11)4-3-5-10(2)8-12/h5-8H,3-4H2,1-2H3	2.356	28.539	150	0.4	46	34.14	0.206	0
(6E)-8-oxogeraniol		C20223		11412603	64236		LMFA06000130	C10H16O2	168.233	AFC001164	FRKZCCBKUZTFCA-UHFFFAOYSA-N	CC(=CCO)CCC=C(C)C=O	InChI=1S/C10H16O2/c1-9(6-7-11)4-3-5-10(2)8-12/h5-6,8,11H,3-4,7H2,1-2H3	2.1	29.873	150	0.5	46	37.3	0.222	0
(9Z)-(13S)-12,13-epoxyoctadeca-9,11-dienoate		C04594		46878374	57465	FDB030134	LMFA02000281	[C18H29O3]-	293.422	AFC001406	ZFVKKBAQVWQQHP-UHFFFAOYSA-M	CCCCCC1C(=CC=CCCCCCCCC(=O)[O-])O1	InChI=1S/C18H30O3/c1-2-3-10-13-16-17(21-16)14-11-8-6-4-5-7-9-12-15-18(19)20/h8,11,14,16H,2-7,9-10,12-13,15H2,1H3,(H,19,20)/p-1	4.471	53.423	572	0.722	90	52.66	0.18	2
(9Z,11E,14Z)-(13S)-hydroperoxyoctadeca-(9,11,14)-trienoate		C04785		5280730	136803	FDB030137	LMFA02000114	[C18H29O4]-	309.421	AFC001134	UKAYSZOBJMGOTG-UHFFFAOYSA-M	CCCC=CC(C=CC=CCCCCCCCC(=O)[O-])OO	InChI=1S/C18H30O4/c1-2-3-11-14-17(22-21)15-12-9-7-5-4-6-8-10-13-16-18(19)20/h7,9,11-12,14-15,17,21H,2-6,8,10,13,16H2,1H3,(H,19,20)/p-1	4.718	54.225	577	0.611	86	69.59	0.225	1
(E)-2-benzylidenesuccinyl-CoA		C09818	HMDB0012223	9543003	27639	FDB028867		C32H44N7O19P3S	955.716	AFC001126	CIZCKPNGZPENDV-UHFFFAOYSA-N	CC(C)(COP(=O)(O)OP(=O)(O)OCC1C(C(C(N2C=NC3=C2N=CN=C3N)O1)O)OP(=O)(O)O)C(C(=O)NCCC(=O)NCCSC(=O)C(=CC4=CC=CC=C4)CC(=O)O)O	InChI=1S/C32H44N7O19P3S/c1-32(2,26(44)29(45)35-9-8-21(40)34-10-11-62-31(46)19(13-22(41)42)12-18-6-4-3-5-7-18)15-55-61(52,53)58-60(50,51)54-14-20-25(57-59(47,48)49)24(43)30(56-20)39-17-38-23-27(33)36-16-37-28(23)39/h3-7,12,16-17,20,24-26,30,43-44H,8-11,13-15H2,1-2H3,(H,34,40)(H,35,45)(H,41,42)(H,50,51)(H,52,53)(H2,33,36,37)(H2,47,48,49)	-4.15	122.387	3269	0.469	320	452.38	0.474	4
(E)-2-decen-1-ol	18409-18-2		HMDB0032532	5364942		FDB010402	LMFA05000142	C10H20O	156.266	AFC001027	QOPYYRPCXHTOQZ-UHFFFAOYSA-N	CCCCCCCC=CCO	InChI=1S/C10H20O/c1-2-3-4-5-6-7-8-9-10-11/h8-9,11H,2-7,10H2,1H3	3.398	31.738	150	0.8	38	20.23	0.13	0
(E)-2-nonen-1-ol	31502-14-4		HMDB0041498	5364941	142604	FDB004252	LMFA05000131	C9H18O	142.239	AFC001026	NSSALFVIQPAIQK-UHFFFAOYSA-N	CCCCCCC=CCO	InChI=1S/C9H18O/c1-2-3-4-5-6-7-8-9-10/h7-8,10H,2-6,9H2,1H3	2.942	28.644	122	0.778	34	20.23	0.142	0
(E)-6-nonenal	2277-20-5			5283338			LMFA06000044	C9H16O	140.223	AFC000975	RTNPCOBSXBGDMO-UHFFFAOYSA-N	CCC=CCCCCC=O	InChI=1S/C9H16O/c1-2-3-4-5-6-7-8-9-10/h3-4,9H,2,5-8H2,1H3	2.777	27.311	122	0.667	34	17.07	0.122	0
(E)-beta-farnesene	18794-84-8	C09666	HMDB0062763	5281517	39241	FDB030142		C15H24	204.352	AFC000943	JSNRRGGBADWTMC-UHFFFAOYSA-N	C=CC(=C)CCC=C(C)CCC=C(C)C	InChI=1S/C15H24/c1-6-14(4)10-8-12-15(5)11-7-9-13(2)3/h6,9,12H,1,4,7-8,10-11H2,2-3,5H3	5.515	42.403	235	0.467	60	0	0	1
(E)-beta-ocimene	24394-14-7	C09873	HMDB0030089	5281553	64280	FDB001465	LMPR0102010021	C10H16	136.234	AFC000948	IHPKGUQCSIINRJ-UHFFFAOYSA-N	C=CC(=CCC=C(C)C)C	InChI=1S/C10H16/c1-5-10(4)8-6-7-9(2)3/h5,7-8H,1,6H2,2-4H3	3.634	28.269	98	0.4	38	0	0	0
(E)-cinnamoyl-CoA	76109-04-1	C16256		6444037	10956	FDB030140	LMFA07050294	C11H14N4OS	250.322	AFC001419	WSVMNFMCEUQEHV-UHFFFAOYSA-N	CC1=C(C)SC(=N1)NC(=O)C(C)N2C=CN=C2	InChI=1S/C11H14N4OS/c1-7-9(3)17-11(13-7)14-10(16)8(2)15-5-4-12-6-15/h4-6,8H,1-3H3,(H,13,14,16)	0.128	36.797	257	0.364	86	82.36	0.329	0
(E)-indol-3-ylacetaldoxime	2776-06-9	C02937		5371769	17545	FDB030141		C10H10N2O	174.2	AFC001035	ZLIGRGHTISHYNH-UHFFFAOYSA-N	C1=CC2=C(C=C1)NC=C2CC=NO	InChI=1S/C10H10N2O/c13-12-6-5-8-7-11-10-4-2-1-3-9(8)10/h1-4,6-7,11,13H,5H2	-0.368	27.27	167	0.1	64	44.62	0.256	0
(E)-nerolidol	1119-38-6	C09704	HMDB0041629	5281525	141283	FDB021837	LMPR0103010005	C15H26O	222.367	AFC000946	FQTLCLSUCSAZDY-UHFFFAOYSA-N	C=CC(C)(CCC=C(C)CCC=C(C)C)O	InChI=1S/C15H26O/c1-6-15(5,16)12-8-11-14(4)10-7-9-13(2)3/h6,9,11,16H,1,7-8,10,12H2,2-5H3	4.562	44.539	254	0.6	68	20.23	0.091	0
(E)-non-6-en-1-ol	31502-19-9		HMDB0059887	5362811		FDB021469	LMFA05000133	C9H18O	142.239	AFC001017	XJHRZBIBSSVCEL-UHFFFAOYSA-N	CCC=CCCCCCO	InChI=1S/C9H18O/c1-2-3-4-5-6-7-8-9-10/h3-4,10H,2,5-9H2,1H3	2.807	28.644	122	0.778	34	20.23	0.142	0
(E,E)-2,4-decadienal	2363-88-4		HMDB0036598	5283349	149547	FDB015511	LMFA06000057	C10H16O	152.234	AFC000977	JZQKTMZYLHNFPL-UHFFFAOYSA-N	CCCCCC=CC=CC=O	InChI=1S/C10H16O/c1-2-3-4-5-6-7-8-9-10-11/h6-10H,2-5H2,1H3	3.21	29.071	150	0.5	38	17.07	0.112	0
(E,E)-2,4-nonadienal	5910-87-2;6750-03-4		HMDB0031685	5283339		FDB011673	LMFA06000045	C9H14O	138.207	AFC001092	ZHHYXNZJDGDGPJ-UHFFFAOYSA-N	CCCCC=CC=CC=O	InChI=1S/C9H14O/c1-2-3-4-5-6-7-8-9-10/h5-9H,2-4H2,1H3	2.754	25.977	122	0.444	34	17.07	0.124	0
(E,E)-2,6-nonadienal	17587-33-6		HMDB0031261	88369124		FDB003301	LMFA06000046	C9H14O	138.207	AFC000818	HZYHMHHBBBSGHB-UHFFFAOYSA-N	CCC=CCCC=CC=O	InChI=1S/C9H14O/c1-2-3-4-5-6-7-8-9-10/h3-4,7-9H,2,5-6H2,1H3	2.754	25.977	122	0.444	34	17.07	0.124	0
(E,E)-3,6-nonadien-1-ol								C9H16O	140.223	AFC001094	PICGPEBVZGCYBV-UHFFFAOYSA-N	CCC=CCC=CCCO	InChI=1S/C9H16O/c1-2-3-4-5-6-7-8-9-10/h3-4,6-7,10H,2,5,8-9H2,1H3	2.363	27.311	122	0.556	34	20.23	0.144	0
(E,E)-alpha-farnesene	502-61-4	C09665	HMDB0036065	5281516	10280	FDB014895		C15H24	204.352	AFC000942	CXENHBSYCFFKJS-UHFFFAOYSA-N	C=CC(=CCC=C(C)CCC=C(C)C)C	InChI=1S/C15H24/c1-6-14(4)10-8-12-15(5)11-7-9-13(2)3/h6,9-10,12H,1,7-8,11H2,2-5H3	5.461	42.403	235	0.467	60	0	0	1
(E,Z)-2,4-decadienal	25152-83-4		HMDB0036598	6427087		FDB015512	LMFA06000146	C10H16O	152.234	AFC000977	JZQKTMZYLHNFPL-UHFFFAOYSA-N	CCCCCC=CC=CC=O	InChI=1S/C10H16O/c1-2-3-4-5-6-7-8-9-10-11/h6-10H,2-5H2,1H3	3.21	29.071	150	0.5	38	17.07	0.112	0
(E,Z)-2,4-heptadienal	4313-02-4		HMDB0061891	11788274		FDB008347	LMFA06000126	C7H10O	110.154	AFC000971	SATICYYAWWYRAM-UHFFFAOYSA-N	CCC=CC=CC=O	InChI=1S/C7H10O/c1-2-3-4-5-6-7-8/h3-7H,2H2,1H3	1.841	19.79	74	0.286	26	17.07	0.155	0
(E,Z)-2,4-nonadienal	21661-99-4			6429282		FDB029702		C9H14O	138.207	AFC001092	ZHHYXNZJDGDGPJ-UHFFFAOYSA-N	CCCCC=CC=CC=O	InChI=1S/C9H14O/c1-2-3-4-5-6-7-8-9-10/h5-9H,2-4H2,1H3	2.754	25.977	122	0.444	34	17.07	0.124	0
(E,Z)-3,6-nonadien-1-ol	56805-23-3		HMDB0038067	44630408		FDB017279	LMFA05000555	C9H16O	140.223	AFC001094	PICGPEBVZGCYBV-UHFFFAOYSA-N	CCC=CCC=CCCO	InChI=1S/C9H16O/c1-2-3-4-5-6-7-8-9-10/h3-4,6-7,10H,2,5,8-9H2,1H3	2.363	27.311	122	0.556	34	20.23	0.144	0
(KDO)2-(lauroyl)-lipid IVA		C06251		25244565	27422			[C96H170N2O38P2]6-	2022.32	AFC001335	JVUUYJGQIVCMIU-UHFFFAOYSA-H	CCCCCCCCCCCC(CC(=O)NC1C(C(C(COC2C(C(C(C(COC3(CC(C(C(C(CO)O)O3)O)OC4(CC(C(C(C(CO)O)O4)O)O)C(=O)[O-])C(=O)[O-])O2)OP(=O)([O-])[O-])OC(=O)CC(CCCCCCCCCCC)O)NC(=O)CC(CCCCCCCCCCC)OC(=O)CCCCCCCCCCC)OC1OP(=O)([O-])[O-])O)OC(=O)CC(CCCCCCCCCCC)O)O	InChI=1S/C96H176N2O38P2/c1-6-11-16-21-26-31-36-41-46-51-66(101)56-76(107)97-81-89(130-79(110)57-67(102)52-47-42-37-32-27-22-17-12-7-2)85(114)74(128-92(81)136-138(122,123)124)64-125-91-82(98-77(108)59-69(54-49-44-39-34-29-24-19-14-9-4)127-78(109)55-50-45-40-35-30-25-20-15-10-5)90(131-80(111)58-68(103)53-48-43-38-33-28-23-18-13-8-3)88(135-137(119,120)121)75(129-91)65-126-95(93(115)116)61-73(84(113)…	11.448	322.251	8164	0.927	652	668.96	0.331	5
(KDO)-lipid IVA(5-)		C06025		25246208	60364			[C76H137N2O30P2]5-	1620.85	AFC001365	GPNCBCJEDRRCDW-UHFFFAOYSA-I	CCCCCCCCCCCC(CC(=O)NC1C(C(C(COC2C(C(C(C(COC3(CC(C(C(C(CO)O)O3)O)O)C(=O)[O-])O2)OP(=O)([O-])[O-])OC(=O)CC(CCCCCCCCCCC)O)NC(=O)CC(CCCCCCCCCCC)O)OC1OP(=O)([O-])[O-])O)OC(=O)CC(CCCCCCCCCCC)O)O	InChI=1S/C76H142N2O30P2/c1-5-9-13-17-21-25-29-33-37-41-53(80)45-61(86)77-65-71(104-63(88)47-55(82)43-39-35-31-27-23-19-15-11-7-3)68(91)59(102-74(65)108-110(97,98)99)51-100-73-66(78-62(87)46-54(81)42-38-34-30-26-22-18-14-10-6-2)72(105-64(89)48-56(83)44-40-36-32-28-24-20-16-12-8-4)70(107-109(94,95)96)60(103-73)52-101-76(75(92)93)49-57(84)67(90)69(106-76)58(85)50-79/h53-60,65-74,79-85,90-91H,5-52H2,…	8.817	258.631	6196	0.934	516	543.61	0.336	5
(N(omega)-L-arginino)succinate(1-)	2387-71-5	C03406		46878376	57472			[C10H17N4O6]-	289.266	AFC001407	KDZOASGQNOPSCU-UHFFFAOYSA-M	C(CC(C(=O)[O-])[NH3+])C[NH+]=C(N)NC(CC(=O)[O-])C(=O)[O-]	InChI=1S/C10H18N4O6/c11-5(8(17)18)2-1-3-13-10(12)14-6(9(19)20)4-7(15)16/h5-6H,1-4,11H2,(H,15,16)(H,17,18)(H,19,20)(H3,12,13,14)/p-1	-6.382	38.147	359	0.6	86	200.05	0.692	0
(R)-3-hydroxybutanoyl-CoA	21804-29-5	C03561	HMDB0001166	11966146	15452	FDB022460	LMFA07050148	C25H42N7O18P3S	853.625	AFC001127	QHHKKMYHDBRONY-UHFFFAOYSA-N	CC(CC(=O)SCCNC(=O)CCNC(=O)C(C(C)(C)COP(=O)(O)OP(=O)(O)OCC1C(C(C(N2C=NC3=C2N=CN=C3N)O1)O)OP(=O)(O)O)O)O	InChI=1S/C25H42N7O18P3S/c1-13(33)8-16(35)54-7-6-27-15(34)4-5-28-23(38)20(37)25(2,3)10-47-53(44,45)50-52(42,43)46-9-14-19(49-51(39,40)41)18(36)24(48-14)32-12-31-17-21(26)29-11-30-22(17)32/h11-14,18-20,24,33,36-37H,4-10H2,1-3H3,(H,27,34)(H,28,38)(H,42,43)(H,44,45)(H2,26,29,30)(H2,39,40,41)	-5.462	107.931	2511	0.68	278	435.31	0.51	4
(R)-3-methylene-6-((S)-1,2,2-trimethylcyclopentyl)cyclohex-1-ene				25202927				C15H24	204.352	AFC001319	QPXHUMFBJLASJO-UHFFFAOYSA-N	C=C1C=CC(CC1)C2(C)CCCC2(C)C	InChI=1S/C15H24/c1-12-6-8-13(9-7-12)15(4)11-5-10-14(15,2)3/h6,8,13H,1,5,7,9-11H2,2-4H3	4.513	42.403	177	0.733	82	0	0	1
(R)-lactate	10326-41-7	C00256	HMDB0001311	61503	16004	FDB030146		C3H6O3	90.0781	AFC000421	JVTAAEKCZFNVCJ-UHFFFAOYSA-N	CC(C(=O)O)O	InChI=1S/C3H6O3/c1-2(4)3(5)6/h2,4H,1H3,(H,5,6)	-0.311	11.687	24	0.667	22	57.53	0.639	0
(R)-lipoate	1200-22-2	C16241	HMDB0001451	1549144	30313	FDB022631	LMFA01130001	[C8H13O2S2]-	205.32	AFC000843	AGBQKNBQESQNJD-UHFFFAOYSA-M	C(CCC(=O)[O-])CC1CCSS1	InChI=1S/C8H14O2S2/c9-8(10)4-2-1-3-7-5-6-11-12-7/h7H,1-6H2,(H,9,10)/p-1	1.556	30.152	155	0.875	52	90.73	0.443	0
(R)-mandelonitrile	10020-96-9	C00561	HMDB0060486	9548674	18450			C8H7NO	133.148	AFC001137	NNICRUQPODTGRU-UHFFFAOYSA-N	C1=CC=C(C=C1)C(C#N)O	InChI=1S/C8H7NO/c9-6-8(10)7-4-2-1-3-5-7/h1-5,8,10H	0.732	20.65	90	0.125	44	44.02	0.331	0
(R)-mevalonate	1192-42-3	C00418	HMDB0000227	5288798	36464	FDB030148		[C6H11O4]-	147.149	AFC000991	KJTLQQUUPVSXIM-UHFFFAOYSA-M	CC(CCO)(CC(=O)[O-])O	InChI=1S/C6H12O4/c1-6(10,2-3-7)4-5(8)9/h7,10H,2-4H2,1H3,(H,8,9)/p-1	-1.575	21.103	79	0.833	42	80.59	0.548	0
(R)-pantoate	470-29-1	C00522	HMDB0240389	5289105	15980	FDB030150		[C6H11O4]-	147.149	AFC000992	OTOIIPJYVQJATP-UHFFFAOYSA-M	CC(C)(CO)C(C(=O)[O-])O	InChI=1S/C6H12O4/c1-6(2,3-7)4(8)5(9)10/h4,7-8H,3H2,1-2H3,(H,9,10)/p-1	-0.963	21.103	68	0.833	44	80.59	0.548	0
(R,R)-2,3-butanediol	24347-58-8	C03044	HMDB0033007	225936	16982	FDB010997		C4H10O2	90.1212	AFC000625	OWBTYPJTUOEWEK-UHFFFAOYSA-N	CC(C(C)O)O	InChI=1S/C4H10O2/c1-3(5)4(2)6/h3-6H,1-2H3	-0.142	15.312	24	1	22	40.46	0.449	0
(S)-(-)-2-hydroxyisocaproic acid	13748-90-8		HMDB0000746	83697	44510	FDB022218	LMFA01050408	C6H12O3	132.158	AFC000466	LVRFTAZAXQPQHI-UHFFFAOYSA-N	CC(C)CC(C(=O)O)O	InChI=1S/C6H12O3/c1-4(2)3-5(7)6(8)9/h4-5,7H,3H2,1-2H3,(H,8,9)	0.921	20.968	63	0.833	36	57.53	0.436	0
(S)-(+)-allantoin	3844-67-5	C02350	HMDB0000462	439714	15678	FDB031153		C4H6N4O3	158.116	AFC000027	POJWUDADGALRAB-UHFFFAOYSA-N	C1(C(=O)NC(=O)N1)NC(=O)N	InChI=1S/C4H6N4O3/c5-3(10)6-1-2(9)8-4(11)7-1/h1H,(H3,5,6,10)(H2,7,8,9,11)	-1.765	17.847	100	0.25	52	113.32	0.717	0
(S)-1-piperideine-6-carboxylate		C00450	HMDB0012130	45266761	58769	FDB028794		[C6H8NO2]-	126.133	AFC001395	CSDPVAKVEWETFG-UHFFFAOYSA-M	C1CC=NC(C1)C(=O)[O-]	InChI=1S/C6H9NO2/c8-6(9)5-3-1-2-4-7-5/h4-5H,1-3H2,(H,8,9)/p-1	-0.19	18.598	69	0.667	40	52.49	0.416	0
(S)-1-pyrroline-5-carboxylate	64199-88-8	C03912	HMDB0001301	440162	371	FDB030153		C5H7NO2	113.115	AFC000707	DWAKNKKXGALPNW-UHFFFAOYSA-N	C1CC(C(=O)O)N=C1	InChI=1S/C5H7NO2/c7-5(8)4-2-1-3-6-4/h3-4H,1-2H2,(H,7,8)	0.032	16.172	51	0.6	36	49.66	0.439	0
(S)-2,3,4,5-tetrahydrodipicolinate		C03972	HMDB0012289	5460405	16845	FDB030154		[C7H7NO4]2-	169.135	AFC001058	CXMBCXQHOXUCEO-UHFFFAOYSA-L	C1CC(C(=O)[O-])N=C(C1)C(=O)[O-]	InChI=1S/C7H9NO4/c9-6(10)4-2-1-3-5(8-4)7(11)12/h4H,1-3H2,(H,9,10)(H,11,12)/p-2	-1.179	21.296	112	0.571	56	92.62	0.548	0
(S)-2,3-dihydrodipicolinate		C03340	HMDB0012247	5460228	30620	FDB030155		[C7H5NO4]2-	167.119	AFC001051	UWOCFOFVIBZJGH-UHFFFAOYSA-L	C1=CC(=NC(C1)C(=O)[O-])C(=O)[O-]	InChI=1S/C7H7NO4/c9-6(10)4-2-1-3-5(8-4)7(11)12/h1-2,5H,3H2,(H,9,10)(H,11,12)/p-2	-1.202	19.962	112	0.286	56	92.62	0.555	0
(S)-2-acetolactate	71698-08-3	C06010	HMDB0006855	440878	18409	FDB024120	LMFA01050460	C5H8O4	132.115	AFC000726	NMDWGEGFJUBKLB-UHFFFAOYSA-N	CC(=O)C(C)(C(=O)O)O	InChI=1S/C5H8O4/c1-3(6)5(2,9)4(7)8/h9H,1-2H3,(H,7,8)	-0.799	17.342	48	0.6	40	74.6	0.565	0
(S)-2-amino-6-oxopimelate		C03871		25202391	58556			[C7H10NO5]-	188.158	AFC001317	UKCSFKLWNHUBDY-UHFFFAOYSA-M	C(CC(C(=O)[O-])[NH3+])CC(=O)C(=O)[O-]	InChI=1S/C7H11NO5/c8-4(6(10)11)2-1-3-5(9)7(12)13/h4H,1-3,8H2,(H,10,11)(H,12,13)/p-1	-3.092	24.098	152	0.571	54	124.97	0.665	0
(S)-3-amino-2-methylpropanoate	4249-19-8	C03284	HMDB0002166	439434	33094	FDB030157		C4H9NO2	103.12	AFC000677	QCHPKSFMDHPSNR-UHFFFAOYSA-N	CC(CN)C(=O)O	InChI=1S/C4H9NO2/c1-3(2-5)4(6)7/h3H,2,5H2,1H3,(H,6,7)	-0.481	15.745	36	0.75	26	63.32	0.614	0
(S)-3-hydroxy-3-methylglutaryl-CoA	1553-55-5	C00356	HMDB0001375	445127	15467	FDB022587	LMFA07050116	C27H44N7O20P3S	911.662	AFC000770	CABVTRNMFUVUDM-UHFFFAOYSA-N	CC(C)(COP(=O)(O)OP(=O)(O)OCC1C(C(C(N2C=NC3=C2N=CN=C3N)O1)O)OP(=O)(O)O)C(C(=O)NCCC(=O)NCCSC(=O)CC(C)(CC(=O)O)O)O	InChI=1S/C27H44N7O20P3S/c1-26(2,21(40)24(41)30-5-4-15(35)29-6-7-58-17(38)9-27(3,42)8-16(36)37)11-51-57(48,49)54-56(46,47)50-10-14-20(53-55(43,44)45)19(39)25(52-14)34-13-33-18-22(28)31-12-32-23(18)34/h12-14,19-21,25,39-40,42H,4-11H2,1-3H3,(H,29,35)(H,30,41)(H,36,37)(H,46,47)(H,48,49)(H2,28,31,32)(H2,43,44,45)	-5.901	114.389	2893	0.667	300	472.61	0.519	4
(S)-3-hydroxybutanoyl-CoA		C01144		9543037	15453	FDB030161	LMFA07050153	C25H42N7O18P3S	853.625	AFC001127	QHHKKMYHDBRONY-UHFFFAOYSA-N	CC(CC(=O)SCCNC(=O)CCNC(=O)C(C(C)(C)COP(=O)(O)OP(=O)(O)OCC1C(C(C(N2C=NC3=C2N=CN=C3N)O1)O)OP(=O)(O)O)O)O	InChI=1S/C25H42N7O18P3S/c1-13(33)8-16(35)54-7-6-27-15(34)4-5-28-23(38)20(37)25(2,3)10-47-53(44,45)50-52(42,43)46-9-14-19(49-51(39,40)41)18(36)24(48-14)32-12-31-17-21(26)29-11-30-22(17)32/h11-14,18-20,24,33,36-37H,4-10H2,1-3H3,(H,27,34)(H,28,38)(H,42,43)(H,44,45)(H2,26,29,30)(H2,39,40,41)	-5.462	107.931	2511	0.68	278	435.31	0.51	4
(S)-3-hydroxy-isobutyrate		C06001	HMDB0000442	18637352	62638	FDB022048		[C4H7O3]-	103.097	AFC001249	DBXBTMSZEOQQDU-UHFFFAOYSA-M	CC(CO)C(=O)[O-]	InChI=1S/C4H8O3/c1-3(2-5)4(6)7/h3,5H,2H2,1H3,(H,6,7)/p-1	-0.869	14.114	36	0.75	26	60.36	0.586	0
(S)-3-hydroxy-isobutyryl-CoA		C06000	HMDB0001052	46173510	62611	FDB022393	LMFA07050157	[C25H38N7O18P3S]4-	849.594	AFC001403	WWEOGFZEFHPUAM-UHFFFAOYSA-J	CC(CO)C(=O)SCCNC(=O)CCNC(=O)C(C(C)(C)COP(=O)([O-])OP(=O)([O-])OCC1C(C(C(N2C=NC3=C2N=CN=C3N)O1)O)OP(=O)([O-])[O-])O	InChI=1S/C25H42N7O18P3S/c1-13(8-33)24(38)54-7-6-27-15(34)4-5-28-22(37)19(36)25(2,3)10-47-53(44,45)50-52(42,43)46-9-14-18(49-51(39,40)41)17(35)23(48-14)32-12-31-16-20(26)29-11-30-21(16)32/h11-14,17-19,23,33,35-36H,4-10H2,1-3H3,(H,27,34)(H,28,37)(H,42,43)(H,44,45)(H2,26,29,30)(H2,39,40,41)/p-4	-6.712	105.264	2509	0.68	278	446.63	0.526	4
(S)-beta-bisabolene	495-61-4	C16775	HMDB0035992	10104370	49263	FDB015006	LMPR0103060013	C15H24	204.352	AFC001146	XZRVRYFILCSYSP-UHFFFAOYSA-N	CC(=CCCC(=C)C1CC=C(C)CC1)C	InChI=1S/C15H24/c1-12(2)6-5-7-14(4)15-10-8-13(3)9-11-15/h6,8,15H,4-5,7,9-11H2,1-3H3	5.329	42.403	225	0.6	68	0	0	1
(S)-beta-macrocarpene		C19752		49859620	61344			C15H24	204.352	AFC001424	BKRLNEMLMVJATK-UHFFFAOYSA-N	CC1=CCC(CC1)C2=CCCC(C)(C)C2	InChI=1S/C15H24/c1-12-6-8-13(9-7-12)14-5-4-10-15(2,3)11-14/h5-6,13H,4,7-11H2,1-3H3	4.904	42.403	198	0.733	78	0	0	1
(S)-dihydroorotate	5988-19-2	C00337	HMDB0003349	439216	17025	FDB030169		C5H6N2O4	158.112	AFC000648	UFIVEPVSAGBUSI-UHFFFAOYSA-N	C1C(C(=O)O)NC(=O)NC1=O	InChI=1S/C5H6N2O4/c8-3-1-2(4(9)10)6-5(11)7-3/h2H,1H2,(H,9,10)(H2,6,7,8,11)	-1.214	18.209	91	0.4	52	95.5	0.604	0
(S)-lactate	79-33-4	C00186	HMDB0000190	107689	422	FDB003294		C3H6O3	90.0781	AFC000421	JVTAAEKCZFNVCJ-UHFFFAOYSA-N	CC(C(=O)O)O	InChI=1S/C3H6O3/c1-2(4)3(5)6/h2,4H,1H3,(H,5,6)	-0.311	11.687	24	0.667	22	57.53	0.639	0
(S)-methylmalonate-semialdehyde		C06002	HMDB0002217	46173457	62413	FDB031071		[C4H5O3]-	101.081	AFC001401	VOKUMXABRRXHAR-UHFFFAOYSA-M	CC(C=O)C(=O)[O-]	InChI=1S/C4H6O3/c1-3(2-5)4(6)7/h2-3H,1H3,(H,6,7)/p-1	-0.613	12.78	36	0.5	26	57.2	0.566	0
(S)-norcoclaurine	22672-77-1	C06160		440927	17729	FDB011811		C16H17NO3	271.312	AFC000728	WZRCQWQRFZITDX-UHFFFAOYSA-N	C1=C(C=CC(=C1)O)CC2C3=C(CCN2)C=C(C(=C3)O)O	InChI=1S/C16H17NO3/c18-12-3-1-10(2-4-12)7-14-13-9-16(20)15(19)8-11(13)5-6-17-14/h1-4,8-9,14,17-20H,5-7H2	0.714	43.001	365	0.25	106	72.72	0.268	0
(S)-ureidoglycine		C02091		46173475	59947	FDB031161		C3H7N3O3	133.106	AFC001402	VTFWFHCECSOPSX-UHFFFAOYSA-N	C(C(=O)[O-])([NH3+])NC(=O)N	InChI=1S/C3H7N3O3/c4-1(2(7)8)6-3(5)9/h1H,4H2,(H,7,8)(H3,5,6,9)	-3.479	15.654	63	0.333	36	122.89	0.924	0
(Z)-2-decenal	2497-25-8			5354834		FDB029711	LMFA06000053	C10H18O	154.25	AFC000976	MMFCJPPRCYDLLZ-UHFFFAOYSA-N	CCCCCCCC=CC=O	InChI=1S/C10H18O/c1-2-3-4-5-6-7-8-9-10-11/h8-10H,2-7H2,1H3	3.655	30.404	150	0.7	38	17.07	0.111	0
(Z)-2-heptenal	57266-86-1			5362616		FDB003486	LMFA06000019	C7H12O	112.17	AFC000970	NDFKTBCGKNOHPJ-UHFFFAOYSA-N	CCCCC=CC=O	InChI=1S/C7H12O/c1-2-3-4-5-6-7-8/h5-7H,2-4H2,1H3	2.286	21.124	74	0.571	26	17.07	0.152	0
(Z)-2-hexenal	16635-54-4		HMDB0040264	6428782	18554	FDB019981		C6H10O	98.1432	AFC000928	MBDOYVRWFFCFHM-UHFFFAOYSA-N	CCCC=CC=O	InChI=1S/C6H10O/c1-2-3-4-5-6-7/h4-6H,2-3H2,1H3	1.83	18.03	54	0.5	22	17.07	0.174	0
(Z)-2-nonenal	60784-31-8		HMDB0031269	5354833		FDB029683	LMFA06000041	C9H16O	140.223	AFC000973	BSAIUMLZVGUGKX-UHFFFAOYSA-N	CCCCCCC=CC=O	InChI=1S/C9H16O/c1-2-3-4-5-6-7-8-9-10/h7-9H,2-6H2,1H3	3.198	27.311	122	0.667	34	17.07	0.122	0
(Z)-2-octenal	20664-46-4		HMDB0030961	6427080		FDB029664		C8H14O	126.196	AFC000972	LVBXEMGDVWVTGY-UHFFFAOYSA-N	CCCCCC=CC=O	InChI=1S/C8H14O/c1-2-3-4-5-6-7-8-9/h6-8H,2-5H2,1H3	2.742	24.217	96	0.625	30	17.07	0.135	0
(Z)-3-nonenal	31823-43-5			6431042		FDB029674	LMFA06000113	C9H16O	140.223	AFC001093	YXEAENVLZOODMT-UHFFFAOYSA-N	CCCCCC=CCC=O	InChI=1S/C9H16O/c1-2-3-4-5-6-7-8-9-10/h6-7,9H,2-5,8H2,1H3	2.777	27.311	122	0.667	34	17.07	0.122	0
(Z)-3-octen-2-one	51193-77-2			6429262	89712	FDB029663		C8H14O	126.196	AFC001091	ZCFOBLITZWHNNC-UHFFFAOYSA-N	CCCCC=CC(=O)C	InChI=1S/C8H14O/c1-3-4-5-6-7-8(2)9/h6-7H,3-5H2,1-2H3	2.225	24.217	87	0.625	32	17.07	0.135	0
(Z)-4-heptenal	6728-31-0		HMDB0031483	5362814		FDB008061	LMFA06000021	C7H12O	112.17	AFC001019	VVGOCOMZRGWHPI-UHFFFAOYSA-N	CCC=CCCC=O	InChI=1S/C7H12O/c1-2-3-4-5-6-7-8/h3-4,7H,2,5-6H2,1H3	1.865	21.124	74	0.571	26	17.07	0.152	0
(Z)-6-nonenal	2277-19-2		HMDB0030958	5362720	142591	FDB002937	LMFA06000044	C9H16O	140.223	AFC000975	RTNPCOBSXBGDMO-UHFFFAOYSA-N	CCC=CCCCCC=O	InChI=1S/C9H16O/c1-2-3-4-5-6-7-8-9-10/h3-4,9H,2,5-8H2,1H3	2.777	27.311	122	0.667	34	17.07	0.122	0
(Z)-beta-ocimene	3338-55-4		HMDB0030088	5320250	87574	FDB001462	LMPR0102010020	C10H16	136.234	AFC000948	IHPKGUQCSIINRJ-UHFFFAOYSA-N	C=CC(=CCC=C(C)C)C	InChI=1S/C10H16/c1-5-10(4)8-6-7-9(2)3/h5,7-8H,1,6H2,2-4H3	3.634	28.269	98	0.4	38	0	0	0
(Z)-indol-3-ylacetaldoxime		C02937		5459978	48577	FDB030181		C10H10N2O	174.2	AFC001035	ZLIGRGHTISHYNH-UHFFFAOYSA-N	C1=CC2=C(C=C1)NC=C2CC=NO	InChI=1S/C10H10N2O/c13-12-6-5-8-7-11-10-4-2-1-3-9(8)10/h1-4,6-7,11,13H,5H2	-0.368	27.27	167	0.1	64	44.62	0.256	0
(Z)-non-6-en-1-ol	35854-86-5		HMDB0040581	5362792	142603	FDB020363	LMFA05000135	C9H18O	142.239	AFC001017	XJHRZBIBSSVCEL-UHFFFAOYSA-N	CCC=CCCCCCO	InChI=1S/C9H18O/c1-2-3-4-5-6-7-8-9-10/h3-4,10H,2,5-9H2,1H3	2.807	28.644	122	0.778	34	20.23	0.142	0
(Z,E)-alpha-farnesene	26560-14-5		HMDB0036066	5362889	39238	FDB014896		C15H24	204.352	AFC000942	CXENHBSYCFFKJS-UHFFFAOYSA-N	C=CC(=CCC=C(C)CCC=C(C)C)C	InChI=1S/C15H24/c1-6-14(4)10-8-12-15(5)11-7-9-13(2)3/h6,9-10,12H,1,7-8,11H2,2-5H3	5.461	42.403	235	0.467	60	0	0	1
(Z,Z)-2,6-nonadienol	7786-44-9		HMDB0031262	92450317	142615	FDB012581		C9H16O	140.223	AFC001020	AMXYRHBJZOVHOL-UHFFFAOYSA-N	CCC=CCCC=CCO	InChI=1S/C9H16O/c1-2-3-4-5-6-7-8-9-10/h3-4,7-8,10H,2,5-6,9H2,1H3	2.498	27.311	122	0.556	34	20.23	0.144	0
(Z,Z)-3,6-nonadienal	21944-83-2	C16323	HMDB0031152	5352808	80444	FDB003165	LMFA06000047	C9H14O	138.207	AFC001008	FIDBXHOCOXRPRO-UHFFFAOYSA-N	CCC=CCC=CCC=O	InChI=1S/C9H14O/c1-2-3-4-5-6-7-8-9-10/h3-4,6-7,9H,2,5,8H2,1H3	2.332	25.977	122	0.444	34	17.07	0.124	0
[4-(5,5-dimethylcyclohex-1-en-1-yl)-cyclohex-1-en-1-yl] methanol		C22012		134716635	141850			C15H24O	220.351	AFC001543	TWLSWZMXZCBDMX-UHFFFAOYSA-N	CC1(C)CCC=C(C1)C2CC=C(CC2)CO	InChI=1S/C15H24O/c1-15(2)9-3-4-14(10-15)13-7-5-12(11-16)6-8-13/h4-5,13,16H,3,6-11H2,1-2H3	3.813	43.205	235	0.733	82	20.23	0.092	0
1-({[5-(Œ±-d-galactopyranosyloxy)methyl]-1H-pyrrole-2-carbaldehyde-1-yl}-ethyl)-1H-pyrazole								C17H23N3O7	381.381	AFC001610	JMVOGCFGPNQCJH-UHFFFAOYSA-N	C1=CN(CCN2C(=CC=C2COC3C(C(C(C(CO)O3)O)O)O)C=O)N=C1	InChI=1S/C17H23N3O7/c21-8-11-2-3-12(20(11)7-6-19-5-1-4-18-19)10-26-17-16(25)15(24)14(23)13(9-22)27-17/h1-5,8,13-17,22-25H,6-7,9-10H2	-2.384	54.17	590	0.529	138	135.29	0.355	0
1-(5-phospho-D-ribosyl)-AMP	1109-75-7	C02741	HMDB0012276	11988267	18374	FDB028908		C15H23N5O14P2	559.316	AFC001191	RTQMRTSPTLIIHM-UHFFFAOYSA-N	C(C1C(C(C(N2C=NC3=C(C2=N)N=CN3C4C(C(C(COP(=O)(O)O)O4)O)O)O1)O)O)OP(=O)(O)O	InChI=1S/C15H23N5O14P2/c16-12-7-13(18-4-19(12)14-10(23)8(21)5(33-14)1-31-35(25,26)27)20(3-17-7)15-11(24)9(22)6(34-15)2-32-36(28,29)30/h3-6,8-11,14-16,21-24H,1-2H2,(H2,25,26,27)(H2,28,29,30)	-5.835	65.724	1040	0.667	200	307.57	0.55	3
1-(5-phosphoribosyl)-5-[(5-phosphoribosylamino)methylideneamino]imidazole-4-carboxamide	36244-83-4	C04896	HMDB0012287	5460212	18302	FDB030197		C15H25N5O15P2	577.332	AFC001050	QOUSHGMTBIIAHR-UHFFFAOYSA-N	C(C1C(C(C(N=CNC2=C(C(=O)N)N=CN2C3C(C(C(COP(=O)(O)O)O3)O)O)O1)O)O)OP(=O)(O)O	InChI=1S/C15H25N5O15P2/c16-12(25)7-13(17-3-18-14-10(23)8(21)5(34-14)1-32-36(26,27)28)20(4-19-7)15-11(24)9(22)6(35-15)2-33-37(29,30)31/h3-6,8-11,14-15,21-24H,1-2H2,(H2,16,25)(H,17,18)(H2,26,27,28)(H2,29,30,31)	-6.712	67.86	1062	0.667	196	335.6	0.582	4
1-(9Z-hexadecenoyl)-sn-glycero-3-phosphocholine	76790-27-7	C04230	HMDB0010383	24779461	73851	FDB027534		C24H48NO7P	493.615	AFC001920	LFUDDCMNKWEORN-UHFFFAOYSA-N	CCCCCC/C=C\CCCCCCCC(=O)OC[C@H](COP(=O)([O-])OCC[N+](C)(C)C)O	InChI=1S/C24H48NO7P/c1-5-6-7-8-9-10-11-12-13-14-15-16-17-18-24(27)30-21-23(26)22-32-33(28,29)31-20-19-25(2,3)4/h10-11,23,26H,5-9,12-22H2,1-4H3	3.172	84.59	1270	0.875	142	114.93	0.233	1
1-(9Z-octadecenoyl)-sn-glycero-3-phosphocholine	19420-56-5		HMDB0002815	16081932	28610	FDB005287	LMGP01050032	C26H52NO7P	521.668	AFC001926	YAMUFBLWGFFICM-UHFFFAOYSA-N	CCCCCCCC/C=C\CCCCCCCC(=O)OC[C@H](COP(=O)([O-])OCC[N+](C)(C)C)O	InChI=1S/C26H52NO7P/c1-5-6-7-8-9-10-11-12-13-14-15-16-17-18-19-20-26(29)32-23-25(28)24-34-35(30,31)33-22-21-27(2,3)4/h12-13,25,28H,5-11,14-24H2,1-4H3	4.085	90.777	1456	0.885	150	114.93	0.22	3
1-(o-carboxyphenylamino)-1'-deoxyribulose-5'-phosphate	5962-18-5	C01302		446894	29112			C12H16NO9P	349.231	AFC000784	QKMBYNRMPRKVTO-UHFFFAOYSA-N	C1=CC(=C(C=C1)NCC(=O)C(C(COP(=O)(O)O)O)O)C(=O)O	InChI=1S/C12H16NO9P/c14-9(11(16)10(15)6-22-23(19,20)21)5-13-8-4-2-1-3-7(8)12(17)18/h1-4,10-11,13,15-16H,5-6H2,(H,17,18)(H2,19,20,21)	-2.432	43.737	437	0.333	110	183.43	0.526	1
1,10-undecadiene	13688-67-0			139543	157731			C11H20	152.281	AFC001944	VOSLXTGMYNYCPW-UHFFFAOYSA-N	C=CCCCCCCCC=C	InChI=1S/C11H20/c1-3-5-7-9-11-10-8-6-4-2/h3-4H,1-2,5-11H2	4.089							0
1,2-benzoquinone	583-63-1	C02351	HMDB0012133	11421	17253	FDB004549		C6H4O2	108.095	AFC000338	WOAHJDHKFWSLKE-UHFFFAOYSA-N	C1=CC(=O)C(=O)C=C1	InChI=1S/C6H4O2/c7-5-3-1-2-4-6(5)8/h1-4H	0.408	14.831	54	0	36	34.14	0.316	0
1,2-dihydroxy-5-(methylthio)pent-1-en-3-one	746507-19-7	C15606	HMDB0012134	5462190	49252	FDB030186		C6H10O3S	162.208	AFC001066	CILXJJLQPTUUSS-UHFFFAOYSA-N	CSCCC(=O)C(=CO)O	InChI=1S/C6H10O3S/c1-10-3-2-5(8)6(9)4-7/h4,7,9H,2-3H2,1H3	-0.257	22.534	94	0.5	38	82.83	0.511	0
1,3-bisphospho-D-glycerate	38168-82-0	C00236	HMDB0001270	439191	16001	FDB030188		C3H8O10P2	266.037	AFC000644	LJQLQCAXBUHEAZ-UHFFFAOYSA-N	C(C(C(=O)OP(=O)(O)O)O)OP(=O)(O)O	InChI=1S/C3H8O10P2/c4-2(1-12-14(6,7)8)3(5)13-15(9,10)11/h2,4H,1H2,(H2,6,7,8)(H2,9,10,11)	-2.977	25.894	176	0.667	70	190.44	0.716	0
1,3-dimethyluric acid	944-73-0		HMDB0001857	70346	68447	FDB022712		C7H8N4O3	196.16	AFC001945	OTSBKHHWSQYEHK-UHFFFAOYSA-N	CN1C2=C(C(=O)N(C1=O)C)NC(=O)N2	InChI=1S/C7H8N4O3/c1-10-4-3(8-6(13)9-4)5(12)11(2)7(10)14/h1-2H3,(H2,8,9,13)	-1.746							0
1,4-dihydroxy-2-naphthoate	31519-22-9	C03657		671	18094	FDB030191		C11H8O4	204.179	AFC000091	VOJUXHHACRXLTD-UHFFFAOYSA-N	C1=CC2=C(C=C(C(=C2C=C1)O)C(=O)O)O	InChI=1S/C11H8O4/c12-9-5-8(11(14)15)10(13)7-4-2-1-3-6(7)9/h1-5,12-13H,(H,14,15)	0.386	27.902	166	0	78	77.76	0.381	0
1,4-dihydroxy-2-naphthoyl-CoA		C15547		44140569	52668	FDB030192		C32H42N7O19P3S	953.7	AFC001375	PYTINLGPKDJURZ-UHFFFAOYSA-N	CC(C)(COP(=O)(O)OP(=O)(O)OCC1C(C(C(N2C=NC3=C2N=CN=C3N)O1)O)OP(=O)(O)O)C(C(=O)NCCC(=O)NCCSC(=O)C4=CC(=C5C=CC=CC5=C4O)O)O	InChI=1S/C32H42N7O19P3S/c1-32(2,26(44)29(45)35-8-7-21(41)34-9-10-62-31(46)18-11-19(40)16-5-3-4-6-17(16)23(18)42)13-55-61(52,53)58-60(50,51)54-12-20-25(57-59(47,48)49)24(43)30(56-20)39-15-38-22-27(33)36-14-37-28(22)39/h3-6,11,14-15,20,24-26,30,40,42-44H,7-10,12-13H2,1-2H3,(H,34,41)(H,35,45)(H,50,51)(H,52,53)(H2,33,36,37)(H2,47,48,49)	-4.799	121.053	3326	0.438	330	455.54	0.478	4
1,5-Dihydrocoenzyme F420(4-)		C22199		46878391	57530			[C29H34N5O18P]4-	771.578	AFC001749	IXPYGZIWHPPILV-UHFFFAOYSA-J	C[C@@H](C(=O)N[C@@H](CCC(=O)N[C@@H](CCC(=O)[O-])C(=O)[O-])C(=O)[O-])OP(=O)([O-])OC[C@H]([C@H]([C@H](CN1C2=CC(=CC=C2CC3=C1NC(=O)NC3=O)O)O)O)O	InChI=1S/C29H38N5O18P/c1-12(25(42)31-17(28(46)47)4-6-21(38)30-16(27(44)45)5-7-22(39)40)52-53(49,50)51-11-20(37)23(41)19(36)10-34-18-9-14(35)3-2-13(18)8-15-24(34)32-29(48)33-26(15)43/h2-3,9,12,16-17,19-20,23,35-37,41H,4-8,10-11H2,1H3,(H,30,38)(H,31,42)(H,39,40)(H,44,45)(H,46,47)(H,49,50)(H2,32,33,43,48)/p-4	-6.046	97.277	2194	0.483	268	389.35	0.505	4
1,5-dihydroriboflavin		C01007		14080393	17607	FDB022688		C17H22N4O6	378.38	AFC001218	SGSVWAYHEWEQET-UHFFFAOYSA-N	CC1=C(C)C=C2C(=C1)NC3=C(NC(=O)NC3=O)N2CC(C(C(CO)O)O)O	InChI=1S/C17H22N4O6/c1-7-3-9-10(4-8(7)2)21(5-11(23)14(25)12(24)6-22)15-13(18-9)16(26)20-17(27)19-15/h3-4,11-12,14,18,22-25H,5-6H2,1-2H3,(H2,19,20,26,27)	-1.902	53.801	490	0.412	144	154.39	0.408	1
1,5-dihydroriboflavin 5'-(dihydrogen phosphate)	5666-16-0	C01847	HMDB0001142	445395	16048	FDB022449		C17H23N4O9P	458.36	AFC000772	YTNIXZGTHTVJBW-UHFFFAOYSA-N	CC1=C(C)C=C2C(=C1)NC3=C(NC(=O)NC3=O)N2CC(C(C(COP(=O)(O)O)O)O)O	InChI=1S/C17H23N4O9P/c1-7-3-9-10(4-8(7)2)21(15-13(18-9)16(25)20-17(26)19-15)5-11(22)14(24)12(23)6-30-31(27,28)29/h3-4,11-12,14,18,22-24H,5-6H2,1-2H3,(H2,27,28,29)(H2,19,20,25,26)	-2.712	60.504	672	0.412	166	210.73	0.46	2
1-[2-(5-hydroxymethyl-1H-pyrrole-2-carbaldehyde-1-yl)ethyl]-1H-pyrazole								C11H13N3O2	219.24	AFC001611	UQDUGHNGDLWEHJ-UHFFFAOYSA-N	C1=CN(CCN2C(=CC=C2CO)C=O)N=C1	InChI=1S/C11H13N3O2/c15-8-10-2-3-11(9-16)14(10)7-6-13-5-1-4-12-13/h1-5,8,16H,6-7,9H2	-0.637	32.932	219	0.273	78	56.14	0.256	0
10-formyl-tetrahydrofolate	2800-34-2	C00234	HMDB0000972	135450591	57454	FDB030256		C20H23N7O7	473.44	AFC001588	AUFGTPPARQZWDO-UHFFFAOYSA-N	C1=C(C=CC(=C1)N(CC2CNC3=C(C(=O)NC(=N3)N)N2)C=O)C(=O)NC(CCC(=O)O)C(=O)O	InChI=1S/C20H23N7O7/c21-20-25-16-15(18(32)26-20)23-11(7-22-16)8-27(9-28)12-3-1-10(2-4-12)17(31)24-13(19(33)34)5-6-14(29)30/h1-4,9,11,13,23H,5-8H2,(H,24,31)(H,29,30)(H,33,34)(H4,21,22,25,26,32)	-2.597	63.85	1034	0.3	172	215.55	0.456	2
10-octadecanoic acid methyl ester	112-61-8			25642		FDB012437		C19H36O2	296.489	AFC000397	HHZIOLLKZWLCOX-UHFFFAOYSA-N	CCCCCCCC=CCCCCCCCCC(=O)OC	InChI=1S/C19H36O2/c1-3-4-5-6-7-8-9-10-11-12-13-14-15-16-17-18-19(20)21-2/h9-10H,3-8,11-18H2,1-2H3	7.086	59.049	577	0.842	80	26.3	0.089	2
11,14-eicosadienoic acid	2091-39-6	C16525	HMDB0005060	5282805	93415	FDB012619	LMFA01030130	C20H36O2	308.499	AFC000969	XSXIVVZCUAHUJO-UHFFFAOYSA-N	CCCCCC=CCC=CCCCCCCCCCC(=O)O	InChI=1S/C20H36O2/c1-2-3-4-5-6-7-8-9-10-11-12-13-14-15-16-17-18-19-20(21)22/h6-7,9-10H,2-5,8,11-19H2,1H3,(H,21,22)	7.303	60.809	639	0.75	84	37.3	0.121	2
12,13(S)-epoxylinolenate		C04672		5280712;20843327	15653;134055	FDB030257	LMFA02000053	[C18H27O3]-	291.406	AFC001253	YZBZORUZOSCZRN-UHFFFAOYSA-M	CCC=CCC1C(=CC=CCCCCCCCC(=O)[O-])O1	InChI=1S/C18H28O3/c1-2-3-10-13-16-17(21-16)14-11-8-6-4-5-7-9-12-15-18(19)20/h3,8,10-11,14,16H,2,4-7,9,12-13,15H2,1H3,(H,19,20)/p-1	4.026	52.089	572	0.611	90	52.66	0.181	2
12,13,17-trihydroxyoctadeca-9-enoate				52940143				[C18H33O5]-	329.452	AFC001437	IYIVYYHFHGVWRB-UHFFFAOYSA-M	CC(CCCC(C(CC=CCCCCCCCC(=O)[O-])O)O)O	InChI=1S/C18H34O5/c1-15(19)11-10-13-17(21)16(20)12-8-6-4-2-3-5-7-9-14-18(22)23/h6,8,15-17,19-21H,2-5,7,9-14H2,1H3,(H,22,23)/p-1	2.649	57.694	608	0.833	94	100.82	0.306	1
12,13-dihydroxyoctadeca-9,15-dienoate			HMDB0010201	52940081	88461	FDB027356	LMFA02000046	[C18H31O4]-	311.437	AFC001433	RGRKFKRAFZJQMS-UHFFFAOYSA-M	CCC=CCC(C(CC=CCCCCCCCC(=O)[O-])O)O	InChI=1S/C18H32O4/c1-2-3-10-13-16(19)17(20)14-11-8-6-4-5-7-9-12-15-18(21)22/h3,8,10-11,16-17,19-20H,2,4-7,9,12-15H2,1H3,(H,21,22)/p-1	3.509	55.559	573	0.722	88	80.59	0.259	1
12,13-dihydroxyoctadeca-9-enoate		C14829	HMDB0004705	52940209	84028	FDB023416	LMFA02000230	[C18H33O4]-	313.453	AFC001440	CQSLTKIXAJTQGA-UHFFFAOYSA-M	CCCCCC(C(CC=CCCCCCCCC(=O)[O-])O)O	InChI=1S/C18H34O4/c1-2-3-10-13-16(19)17(20)14-11-8-6-4-5-7-9-12-15-18(21)22/h8,11,16-17,19-20H,2-7,9-10,12-15H2,1H3,(H,21,22)/p-1	3.954	56.892	573	0.833	88	80.59	0.257	1
12,13-epoxyoctadeca-9,15-dienoate								[C18H29O3]-	293.422	AFC001613	BKKGUKSHPCTUGE-UHFFFAOYSA-M	CCC=CCC1C(CC=CCCCCCCCC(=O)[O-])O1	InChI=1S/C18H30O3/c1-2-3-10-13-16-17(21-16)14-11-8-6-4-5-7-9-12-15-18(19)20/h3,8,10-11,16-17H,2,4-7,9,12-15H2,1H3,(H,19,20)/p-1	4.276	53.423	572	0.722	90	52.66	0.18	1
12-oxo-(E)-10-dodecenoic acid	65410-38-0	C16309	HMDB0037326	5312889	19144	FDB000515	LMFA01060093	C12H20O3	212.286	AFC000995	INMKWUNQKOWGEZ-UHFFFAOYSA-N	C(CCCCCC(=O)O)CCC=CC=O	InChI=1S/C12H20O3/c13-11-9-7-5-3-1-2-4-6-8-10-12(14)15/h7,9,11H,1-6,8,10H2,(H,14,15)	3.264	36.862	279	0.667	56	54.37	0.256	0
12-oxo-(Z)-9-dodecenoic acid		C16311		9548789	19143		LMFA01060167	C12H20O3	212.286	AFC001138	KIHXTOVLSZRTHJ-UHFFFAOYSA-N	C(CCCCCC(=O)O)CC=CCC=O	InChI=1S/C12H20O3/c13-11-9-7-5-3-1-2-4-6-8-10-12(14)15/h5,7,11H,1-4,6,8-10H2,(H,14,15)	2.842	36.862	279	0.667	56	54.37	0.256	0
12-oxo-cis-10,15-phytodienoate		C01226		45266620	57411	FDB001432	LMFA02010001	[C18H27O3]-	291.406	AFC001391	PMTMAFAPLCGXGK-UHFFFAOYSA-M	CCC=CCC1C(CCCCCCCC(=O)[O-])C=CC1=O	InChI=1S/C18H28O3/c1-2-3-7-11-16-15(13-14-17(16)19)10-8-5-4-6-9-12-18(20)21/h3,7,13-16H,2,4-6,8-12H2,1H3,(H,20,21)/p-1	4.002	52.089	473	0.667	92	57.2	0.196	1
12-oxo-phytodienoic acid	67204-66-4	C01226		5280411	15560	FDB001432	LMFA02010001	C18H28O3	292.414	AFC000877	PMTMAFAPLCGXGK-UHFFFAOYSA-N	CCC=CCC1C(CCCCCCCC(=O)O)C=CC1=O	InChI=1S/C18H28O3/c1-2-3-7-11-16-15(13-14-17(16)19)10-8-5-4-6-9-12-18(20)21/h3,7,13-16H,2,4-6,8-12H2,1H3,(H,20,21)	4.68	52.756	473	0.667	92	54.37	0.186	1
13(S)-hydroperoxy-9(Z),11(E),15(Z)-octadecatrienoate				25244639	144034			[C18H29O4]-	309.421	AFC001337	UYQGVDXDXBAABN-UHFFFAOYSA-M	CCC=CCC(C=CC=CCCCCCCCC(=O)[O-])OO	InChI=1S/C18H30O4/c1-2-3-11-14-17(22-21)15-12-9-7-5-4-6-8-10-13-16-18(19)20/h3,7,9,11-12,15,17,21H,2,4-6,8,10,13-14,16H2,1H3,(H,19,20)/p-1	4.583	54.225	577	0.611	86	69.59	0.225	1
13-[O(2')-beta-D-glucopyranosyl-beta-D-glucopyranosyloxy]docosanoate O(6'')-acetate				25246114				[C36H65O14]-	721.894	AFC001361	DYDPBEMJTPLKEJ-UHFFFAOYSA-M	CCCCCCCCCC(CCCCCCCCCCCC(=O)[O-])OC1C(C(C(C(CO)O1)O)O)OC2C(C(C(C(COC(=O)C)O2)O)O)O	InChI=1S/C36H66O14/c1-3-4-5-6-10-13-16-19-25(20-17-14-11-8-7-9-12-15-18-21-28(39)40)47-36-34(32(44)29(41)26(22-37)48-36)50-35-33(45)31(43)30(42)27(49-35)23-46-24(2)38/h25-27,29-37,41-45H,3-23H2,1-2H3,(H,39,40)/p-1	4.075	117.93	1865	0.944	232	224.73	0.312	5
131-hydroxy-magnesium-protoporphyrin IX 13-monomethyl ester		C11829		44229246	15434	FDB030259		[C35H33N4O5]3-	589.662	AFC001379	UBMRUBQHXLXNAA-UHFFFAOYSA-L	C=CC1=C2C=C3C(=C(C=C)C(=N3)C=C4C(=C(C(=CC5=NC(=CC(=C1C)[N-]2)C(=C5CCC(=O)[O-])C)[N-]4)C(CC(=O)OC)O)C)C	InChI=1S/C35H35N4O5/c1-8-21-17(3)24-12-25-19(5)23(10-11-33(41)42)30(38-25)15-31-35(32(40)16-34(43)44-7)20(6)27(39-31)14-29-22(9-2)18(4)26(37-29)13-28(21)36-24/h8-9,12-15,32,40H,1-2,10-11,16H2,3-7H3,(H2-,36,37,38,39,41,42)/q-1/p-2	2.845	92.014	1142	0.257	238	111.38	0.189	1
131-oxo-magnesium-protoporphyrin IX 13-monomethyl ester		C11830		44229101	15433	FDB030260		[C35H31N4O5]3-	587.646	AFC001377	VVAVWZJZDQXGFG-UHFFFAOYSA-K	C=CC1=C2C=C3C(=C(C=C)C(=N3)C=C4C(=C(C(=CC5=NC(=CC(=C1C)[N-]2)C(=C5CCC(=O)[O-])C)[N-]4)C(=O)CC(=O)OC)C)C	InChI=1S/C35H34N4O5/c1-8-21-17(3)24-12-25-19(5)23(10-11-33(41)42)30(38-25)15-31-35(32(40)16-34(43)44-7)20(6)27(39-31)14-29-22(9-2)18(4)26(37-29)13-28(21)36-24/h8-9,12-15H,1-2,10-11,16H2,3-7H3,(H3,36,37,38,39,40,41,42)/p-3	3.092	90.681	1142	0.229	238	108.22	0.184	1
13-sophorosyloxydocosanoate 6',6''-diacetate	20246-59-7			3082161	51078		LMFA13020003	C38H68O15	764.939	AFC000856	LGIFCELMJBBHMO-UHFFFAOYSA-N	CCCCCCCCCC(CCCCCCCCCCCC(=O)O)OC1C(C(C(C(COC(=O)C)O1)O)O)OC2C(C(C(C(COC(=O)C)O2)O)O)O	InChI=1S/C38H68O15/c1-4-5-6-7-11-14-17-20-27(21-18-15-12-9-8-10-13-16-19-22-30(41)42)50-38-36(34(46)32(44)29(52-38)24-49-26(3)40)53-37-35(47)33(45)31(43)28(51-37)23-48-25(2)39/h27-29,31-38,43-47H,4-24H2,1-3H3,(H,41,42)	5.132	124.252	1986	0.921	246	227.97	0.298	5
15,16-dihydroxyoctadeca-9,12-dienoate			HMDB0010208	52940176	88465	FDB027363	LMFA02000047	[C18H31O4]-	311.437	AFC001439	LKLLJYJTYPVCID-UHFFFAOYSA-M	CCC(C(CC=CCC=CCCCCCCCC(=O)[O-])O)O	InChI=1S/C18H32O4/c1-2-16(19)17(20)14-12-10-8-6-4-3-5-7-9-11-13-15-18(21)22/h4,6,10,12,16-17,19-20H,2-3,5,7-9,11,13-15H2,1H3,(H,21,22)/p-1	3.509	55.559	585	0.722	88	80.59	0.259	1
15,16-epoxyoctadeca-9,12-dienoate			HMDB0010206	52940137	88460	FDB027361	LMFA02000041	[C18H29O3]-	293.422	AFC001436	HKSDVVJONLXYKL-UHFFFAOYSA-M	CCC1C(CC=CCC=CCCCCCCCC(=O)[O-])O1	InChI=1S/C18H30O3/c1-2-16-17(21-16)14-12-10-8-6-4-3-5-7-9-11-13-15-18(19)20/h4,6,10,12,16-17H,2-3,5,7-9,11,13-15H2,1H3,(H,19,20)/p-1	4.276	53.423	584	0.722	90	52.66	0.18	2
15,9'-di-cis-phytofluene		C19765		51351778	61990	FDB030265		C40H62	542.922	AFC001095	OVSVTCFNLSGAMM-UHFFFAOYSA-N	CC(=CCCC(=CCCC(=CC=CC(=CC=CC=C(C)CCC=C(C)CCC=C(C)CCC=C(C)C)C)C)C)C	InChI=1S/C40H62/c1-33(2)19-13-23-37(7)27-17-31-39(9)29-15-25-35(5)21-11-12-22-36(6)26-16-30-40(10)32-18-28-38(8)24-14-20-34(3)4/h11-12,15,19-22,25,27-30H,13-14,16-18,23-24,26,31-32H2,1-10H3	14.095	111.741	1834	0.5	170	0	0	3
15-cis-phytoene	13920-14-4	C05421	HMDB0039093	9963391	27787	FDB030266	LMPR01070255	C40H64	544.938	AFC000908	YVLPJIGOMTXXLP-UHFFFAOYSA-N	CC(=CCCC(=CCCC(=CCCC(=CC=CC=C(C)CCC=C(C)CCC=C(C)CCC=C(C)C)C)C)C)C	InChI=1S/C40H64/c1-33(2)19-13-23-37(7)27-17-31-39(9)29-15-25-35(5)21-11-12-22-36(6)26-16-30-40(10)32-18-28-38(8)24-14-20-34(3)4/h11-12,19-22,27-30H,13-18,23-26,31-32H2,1-10H3	14.54	113.075	1834	0.55	170	0	0	3
18-hydroxyoleate		C19616		86289578	78424	FDB030280	LMFA02000181	[C18H33O3]-	297.454	AFC001476	LQUHZVLTTWMBTO-UHFFFAOYSA-M	C(=CCCCCCCCC(=O)[O-])CCCCCCCCO	InChI=1S/C18H34O3/c19-17-15-13-11-9-7-5-3-1-2-4-6-8-10-12-14-16-18(20)21/h1-2,19H,3-17H2,(H,20,21)/p-1	4.932	56.09	579	0.833	80	60.36	0.203	2
18-oxo-oleate				90657874	133357			[C18H31O3]-	295.438	AFC001488	SNOSCANYFCXCGY-UHFFFAOYSA-M	C(=CCCCCCCCC(=O)[O-])CCCCCCCC=O	InChI=1S/C18H32O3/c19-17-15-13-11-9-7-5-3-1-2-4-6-8-10-12-14-16-18(20)21/h1-2,17H,3-16H2,(H,20,21)/p-1	4.902	54.757	579	0.778	80	57.2	0.194	2
1-aminocyclopropane-1-carboxylate	22059-21-8	C01234	HMDB0036458	535	18053	FDB030242		C4H7NO2	101.104	AFC000077	PAJPWUMXBYXFCZ-UHFFFAOYSA-N	C1CC1(C(=O)O)N	InChI=1S/C4H7NO2/c5-4(1-2-4)3(6)7/h1-2,5H2,(H,6,7)	-0.632	14.412	35	0.75	36	63.32	0.627	0
1-butenesulfenate				87828817				C4H8OS	104.172	AFC001480	NGMITSIERXESJI-UHFFFAOYSA-N	CCC=CSO	InChI=1S/C4H8OS/c1-2-3-4-6-5/h3-5H,2H2,1H3	1.175	16.076	38	0.5	18	45.53	0.438	0
1-Caffeoyl-beta-D-glucose	14364-08-0	C10433	HMDB0036937	5281761	614	FDB015906		C15H18O9	342.299	AFC001643	WQSDYZZEIBAPIN-UHFFFAOYSA-N	C1=C(/C=C/C(=O)O[C@H]2[C@@H]([C@H]([C@@H]([C@@H](CO)O2)O)O)O)C=C(C(=C1)O)O	InChI=1S/C15H18O9/c16-6-10-12(20)13(21)14(22)15(23-10)24-11(19)4-2-7-1-3-8(17)9(18)5-7/h1-5,10,12-18,20-22H,6H2	-1.595	45.62	510	0.4	120	156.91	0.459	1
1-chloro-2,4-dinitrobenzene	97-00-7	C14397		6	34718	FDB030243		C6H3ClN2O4	202.552	AFC000001	VYZAHLCBVHPDDF-UHFFFAOYSA-N	C1=C(C=C(C(=C1)Cl)[N+](=O)[O-])[N+](=O)[O-]	InChI=1S/C6H3ClN2O4/c7-5-2-1-4(8(10)11)3-6(5)9(12)13/h1-3H	1.257	20.148	123	0	62	86.28	0.427	0
1-decanol		C01633	HMDB0011624	8174	28903	FDB012351	LMFA05000062	C10H22O	158.281	AFC001831	MWKFXSUHUHTGQN-UHFFFAOYSA-N	CCCCCCCCCCO	InChI=1S/C10H22O/c1-2-3-4-5-6-7-8-9-10-11/h11H,2-10H2,1H3	3.708	33.071	150	1	38	20.23	0.128	0
1-decanoyl-sn-glycero-3-phosphocholine	22248-63-1		HMDB0003752	22851442	77726	FDB023221	LMGP01050005	C18H38NO7P	411.471	AFC001909	SECPDKKEUKDCPG-UHFFFAOYSA-N	CCCCCCCCCC(=O)OC[C@H](COP(=O)([O-])OCC[N+](C)(C)C)O	InChI=1S/C18H38NO7P/c1-5-6-7-8-9-10-11-12-18(21)24-15-17(20)16-26-27(22,23)25-14-13-19(2,3)4/h17,20H,5-16H2,1-4H3	0.88	67.362	788	0.944	118	114.93	0.279	1
1-deoxy-D-xylulose 5-phosphate	190079-18-6	C11437	HMDB0001213	443201	16493	FDB022494		C5H11O7P	214.111	AFC000745	AJPADPZSRRUGHI-UHFFFAOYSA-N	CC(=O)C(C(COP(=O)(O)O)O)O	InChI=1S/C5H11O7P/c1-3(6)5(8)4(7)2-12-13(9,10)11/h4-5,7-8H,2H2,1H3,(H2,9,10,11)	-2.534	25.379	133	0.8	58	134.1	0.627	0
1-deoxy-L-glycero-tetrulose 4-phosphate	130971-02-7	C15556		14056322	50608	FDB030244		C4H9O6P	184.085	AFC001217	OKYHYXLCTGGOLM-UHFFFAOYSA-N	CC(=O)C(COP(=O)(O)O)O	InChI=1S/C4H9O6P/c1-3(5)4(6)2-10-11(7,8)9/h4,6H,2H2,1H3,(H2,7,8,9)	-2.024	21.483	96	0.75	48	113.87	0.619	0
1D-myo-inositol (1)-monophosphate		C01177	HMDB0000213	5288642	58433	FDB023090		[C6H11O9P]2-	258.12	AFC000989	INAPMGSXUVUWAF-UHFFFAOYSA-L	C1(C(C(C(C(C1O)O)OP(=O)([O-])[O-])O)O)O	InChI=1S/C6H13O9P/c7-1-2(8)4(10)6(5(11)3(1)9)15-16(12,13)14/h1-11H,(H2,12,13,14)/p-2	-4.542	28.743	168	1	82	183.38	0.711	0
1D-myo-inositol (3)-monophosphate		C04006	HMDB0006814	5288700	58401	FDB024095		[C6H11O9P]2-	258.12	AFC000989	INAPMGSXUVUWAF-UHFFFAOYSA-L	C1(C(C(C(C(C1O)O)OP(=O)([O-])[O-])O)O)O	InChI=1S/C6H13O9P/c7-1-2(8)4(10)6(5(11)3(1)9)15-16(12,13)14/h1-11H,(H2,12,13,14)/p-2	-4.542	28.743	168	1	82	183.38	0.711	0
1D-myo-inositol (4)-monophosphate	46495-39-0	C03546	HMDB0001313	25200523	58469	FDB022548		[C6H11O9P]2-	258.12	AFC000989	INAPMGSXUVUWAF-UHFFFAOYSA-L	C1(C(C(C(C(C1O)O)OP(=O)([O-])[O-])O)O)O	InChI=1S/C6H13O9P/c7-1-2(8)4(10)6(5(11)3(1)9)15-16(12,13)14/h1-11H,(H2,12,13,14)/p-2	-4.542	28.743	168	1	82	183.38	0.711	0
1D-myo-inositol 1,2,3,4,5,6-hexakisphosphate	3929-21-3	C01204	HMDB0003502	21584050	58130	FDB030293		[C6H6O24P6]12-	647.94	AFC001259	IMQLKJBTEOYOSI-UHFFFAOYSA-B	C1(C(C(C(C(C1OP(=O)([O-])[O-])OP(=O)([O-])[O-])OP(=O)([O-])[O-])OP(=O)([O-])[O-])OP(=O)([O-])[O-])OP(=O)([O-])[O-]	InChI=1S/C6H18O24P6/c7-31(8,9)25-1-2(26-32(10,11)12)4(28-34(16,17)18)6(30-36(22,23)24)5(29-35(19,20)21)3(1)27-33(13,14)15/h1-6H,(H2,7,8,9)(H2,10,11,12)(H2,13,14,15)(H2,16,17,18)(H2,19,20,21)(H2,22,23,24)/p-12	-11.932	55.589	546	1	192	493.38	0.762	3
1D-myo-inositol 5-phosphate	7336-80-3	C06155		160886	37493			C6H13O9P	260.136	AFC000576	INAPMGSXUVUWAF-UHFFFAOYSA-N	C1(C(C(C(C(C1O)O)OP(=O)(O)O)O)O)O	InChI=1S/C6H13O9P/c7-1-2(8)4(10)6(5(11)3(1)9)15-16(12,13)14/h1-11H,(H2,12,13,14)	-3.875	30.076	168	1	82	177.72	0.683	1
1-dodecanol	112-53-8	C02277	HMDB0011626	8193	28878	FDB030246	LMFA05000001	C12H26O	186.335	AFC000305	LQZZUXJYWNFBMV-UHFFFAOYSA-N	CCCCCCCCCCCCO	InChI=1S/C12H26O/c1-2-3-4-5-6-7-8-9-10-11-12-13/h13H,2-12H2,1H3	4.62	39.259	216	1	46	20.23	0.109	1
1-dodecanoyl-sn-glycero-3-phosphocholine	20559-18-6			460605	74966		LMGP01050009	C20H42NO7P	439.525	AFC001913	BWKILASWCLJPBO-UHFFFAOYSA-N	CCCCCCCCCCCC(=O)OC[C@H](COP(=O)([O-])OCC[N+](C)(C)C)O	InChI=1S/C20H42NO7P/c1-5-6-7-8-9-10-11-12-13-14-20(23)26-17-19(22)18-28-29(24,25)27-16-15-21(2,3)4/h19,22H,5-18H2,1-4H3	1.792	73.549	934	0.95	126	114.93	0.262	1
1-heptanol	111-70-6		HMDB0031479	8129	43003	FDB008053	LMFA05000122	C7H16O	116.202	AFC000301	BBMCTIGTTCKYKF-UHFFFAOYSA-N	CCCCCCCO	InChI=1S/C7H16O/c1-2-3-4-5-6-7-8/h8H,2-7H2,1H3	2.339	23.791	74	1	26	20.23	0.174	0
1-hexanol	111-27-3		HMDB0012971	8103	87393	FDB008072	LMFA05000117	C6H14O	102.175	AFC000300	ZSIAUFGUXNUGDI-UHFFFAOYSA-N	CCCCCCO	InChI=1S/C6H14O/c1-2-3-4-5-6-7/h7H,2-6H2,1H3	1.883	20.697	54	1	22	20.23	0.198	0
1-linoleoyl-sn-glycero-3-phosphocholine	22252-07-9		HMDB0010386	11005824	28733	FDB030316	LMGP01050035	C26H50NO7P	519.652	AFC001925	SPJFYYJXNPEZDW-UHFFFAOYSA-N	CCCCC/C=C\C/C=C\CCCCCCCC(=O)OC[C@H](COP(=O)([O-])OCC[N+](C)(C)C)O	InChI=1S/C26H50NO7P/c1-5-6-7-8-9-10-11-12-13-14-15-16-17-18-19-20-26(29)32-23-25(28)24-34-35(30,31)33-22-21-27(2,3)4/h9-10,12-13,25,28H,5-8,11,14-24H2,1-4H3	3.64	89.444	1456	0.808	150	114.93	0.221	3
1-methyladenosine	15763-06-1	C02494	HMDB0003331	27476	16020	FDB021791		C11H15N5O4	281.268	AFC001893	GFYLSDSUCHVORB-UHFFFAOYSA-N	CN1C=NC2=C(C1=N)N=CN2[C@H]3[C@@H]([C@@H]([C@@H](CO)O3)O)O	InChI=1S/C11H15N5O4/c1-15-3-14-10-6(9(15)12)13-4-16(10)11-8(19)7(18)5(2-17)20-11/h3-5,7-8,11-12,17-19H,2H2,1H3	-2.57	38.07	326	0.545	110	124.97	0.445	0
1-nonanol	143-08-8	C14696	HMDB0031265	8914	35986	FDB003307	LMFA05000092	C9H20O	144.255	AFC000317	ZWRUINPWMLAQRD-UHFFFAOYSA-N	CCCCCCCCCO	InChI=1S/C9H20O/c1-2-3-4-5-6-7-8-9-10/h10H,2-9H2,1H3	3.252	29.978	122	1	34	20.23	0.14	0
1-octacosanol	557-61-9	C08387	HMDB0034380	68406	28243	FDB012759	LMFA05000003	C28H58O	410.761	AFC000444	CNNRPFQICPFDPO-UHFFFAOYSA-N	CCCCCCCCCCCCCCCCCCCCCCCCCCCCO	InChI=1S/C28H58O/c1-2-3-4-5-6-7-8-9-10-11-12-13-14-15-16-17-18-19-20-21-22-23-24-25-26-27-28-29/h29H,2-28H2,1H3	11.92	88.756	1176	1	110	20.23	0.049	2
1-octanol	111-87-5	C00756	HMDB0001183	957	16188	FDB012583	LMFA05000130	C8H18O	130.228	AFC000142	KBPLFHHGFOOTCA-UHFFFAOYSA-N	CCCCCCCCO	InChI=1S/C8H18O/c1-2-3-4-5-6-7-8-9/h9H,2-8H2,1H3	2.796	26.884	96	1	30	20.23	0.155	0
1-octen-3-ol	3391-86-4	C14272	HMDB0031299	18827	34118	FDB003350	LMFA05000090	C8H16O	128.212	AFC000378	VSMOENVRRABVKN-UHFFFAOYSA-N	CCCCCC(C=C)O	InChI=1S/C8H16O/c1-3-5-6-7-8(9)4-2/h4,8-9H,2-3,5-7H2,1H3	2.529	25.551	85	0.75	32	20.23	0.158	0
1-octen-3-one	4312-99-6		HMDB0031309	61346	88900	FDB003365	LMFA12000011	C8H14O	126.196	AFC000420	KLTVSWGXIAYTHO-UHFFFAOYSA-N	CCCCCC(=O)C=C	InChI=1S/C8H14O/c1-3-5-6-7-8(9)4-2/h4H,2-3,5-7H2,1H3	2.489	24.217	85	0.625	32	17.07	0.135	0
1-O-sinapoyl-beta-D-glucose	14364-09-1	C01175		5280406	16546	FDB004337		C17H22O10	386.351	AFC000876	XRKBRPFTFKKHEF-UHFFFAOYSA-N	COC1=CC(=CC(=C1O)OC)C=CC(=O)OC2C(C(C(C(CO)O2)O)O)O	InChI=1S/C17H22O10/c1-24-9-5-8(6-10(25-2)13(9)20)3-4-12(19)27-17-16(23)15(22)14(21)11(7-18)26-17/h3-6,11,14-18,20-23H,7H2,1-2H3	-2.029	52.609	583	0.471	134	155.14	0.402	0
1-palmitoyl-lysophosphatidylcholine			HMDB0010382	10097314	72998	FDB027533	LMGP01050018	C24H50NO7P	495.631	AFC001921	ASWBNKHCZGQVJV-UHFFFAOYSA-N	CCCCCCCCCCCCCCCC(=O)OC[C@@H](COP(=O)([O-])OCC[N+](C)(C)C)O	InChI=1S/C24H50NO7P/c1-5-6-7-8-9-10-11-12-13-14-15-16-17-18-24(27)30-21-23(26)22-32-33(28,29)31-20-19-25(2,3)4/h23,26H,5-22H2,1-4H3	3.617	85.924	1270	0.958	142	114.93	0.232	2
1-pentadecanol	629-76-5		HMDB0013299	12397	77468	FDB006219	LMFA05000194	C15H32O	228.415	AFC000354	REIUXOLGHVXAEO-UHFFFAOYSA-N	CCCCCCCCCCCCCCCO	InChI=1S/C15H32O/c1-2-3-4-5-6-7-8-9-10-11-12-13-14-15-16/h16H,2-15H2,1H3	5.989	48.539	338	1	58	20.23	0.089	2
1-pentadecene	13360-61-7		HMDB0031082	25913	77506	FDB003087	LMFA11000327	C15H30	210.399	AFC000398	PJLHTVIBELQURV-UHFFFAOYSA-N	C=CCCCCCCCCCCCCC	InChI=1S/C15H30/c1-3-5-7-9-11-13-15-14-12-10-8-6-4-2/h3H,1,4-15H2,2H3	6.824	46.404	294	0.867	54	0	0	2
1-pentan-3-ol	584-02-1			11428	77519	FDB029632		C5H12O	88.1484	AFC000339	AQIXEPGDORPWBJ-UHFFFAOYSA-N	CCC(CC)O	InChI=1S/C5H12O/c1-3-5(6)4-2/h5-6H,3-4H2,1-2H3	1.416	17.604	29	1	20	20.23	0.23	0
1-pentan-3-one	96-22-0			7288	87755	FDB004343	LMFA12000001	C5H10O	86.1325	AFC000273	FDPIMTJIUBPUKL-UHFFFAOYSA-N	CCC(=O)CC	InChI=1S/C5H10O/c1-3-5(6)4-2/h3-4H2,1-2H3	1.09	16.27	29	0.8	20	17.07	0.198	0
1-pentanol	71-41-0	C16834	HMDB0013036	6276	44884	FDB008230	LMFA05000112	C5H12O	88.1484	AFC000255	AMQJEAYHLZJPGS-UHFFFAOYSA-N	CCCCCO	InChI=1S/C5H12O/c1-2-3-4-5-6/h6H,2-5H2,1H3	1.427	17.604	38	1	18	20.23	0.23	0
1-penten-3-ol	616-25-1		HMDB0031605	12020	89944	FDB008240		C5H10O	86.1325	AFC000347	VHVMXWZXFBOANQ-UHFFFAOYSA-N	C=CC(CC)O	InChI=1S/C5H10O/c1-3-5(6)4-2/h3,5-6H,1,4H2,2H3	1.16	16.27	29	0.6	20	20.23	0.235	0
1-undecanol	112-42-5		HMDB0013113	8184	87499	FDB002917	LMFA05000144	C11H24O	172.308	AFC000304	KJIOQYGWTQBHNH-UHFFFAOYSA-N	CCCCCCCCCCCO	InChI=1S/C11H24O/c1-2-3-4-5-6-7-8-9-10-11-12/h12H,2-11H2,1H3	4.164	36.165	182	1	42	20.23	0.117	0
2-(2-butynyl)cyclohexanone	54166-48-2			584585				C10H14O	150.218	AFC000802	JNULPQQVLJEQMV-UHFFFAOYSA-N	CC#CCC1CCCCC1=O	InChI=1S/C10H14O/c1-2-3-6-9-7-4-5-8-10(9)11/h9H,4-8H2,1H3	2.684	27.737	118	0.7	48	17.07	0.114	0
2-(2-carboxy-4-methylthiazol-5-yl)ethyl phosphate		C20247		46942369	62912	FDB030308		C7H10NO6PS	267.198	AFC001418	XWECMAHAKFWYNV-UHFFFAOYSA-N	CC1=C(CCOP(=O)(O)O)SC(=N1)C(=O)O	InChI=1S/C7H10NO6PS/c1-4-5(2-3-14-15(11,12)13)16-6(8-4)7(9)10/h2-3H2,1H3,(H,9,10)(H2,11,12,13)	-0.797	31.43	224	0.429	78	151.53	0.568	0
2-(2-pentenyl)furan				5369957				C9H12O	136.191	AFC001034	KQMWMXVDLIDHGY-UHFFFAOYSA-N	CCC=CCC1=CC=CO1	InChI=1S/C9H12O/c1-2-3-4-6-9-7-5-8-10-9/h3-5,7-8H,2,6H2,1H3	1.701	24.644	112	0.333	42	9.23	0.068	0
2-(4-hydroxyphenyl)ethanol	501-94-0	C06044	HMDB0004284	10393	1879	FDB031233		C8H10O2	138.164	AFC000329	YCCILVSKPBXVIP-UHFFFAOYSA-N	C1=C(C=CC(=C1)O)CCO	InChI=1S/C8H10O2/c9-6-5-7-1-3-8(10)4-2-7/h1-4,9-10H,5-6H2	0.517	22.352	102	0.25	44	40.46	0.293	0
2-(alpha-D-galactosyl)-sn-glycerol 3-phosphate		C04641		16048616	17506			C9H19O11P	334.215	AFC001241	PLJAVYDLNJODGD-UHFFFAOYSA-N	C(C(COP(=O)(O)O)OC1C(C(C(C(CO)O1)O)O)O)O	InChI=1S/C9H19O11P/c10-1-4(3-18-21(15,16)17)19-9-8(14)7(13)6(12)5(2-11)20-9/h4-14H,1-3H2,(H2,15,16,17)	-3.965	40.961	329	1	102	196.18	0.587	2
2-(alpha-hydroxyethyl)thiamine diphosphate	10055-47-7	C05125	HMDB0003904	440568	978	FDB023246		[C14H23N4O8P2S]+	469.369	AFC000718	RRUVJGASJONMDY-UHFFFAOYSA-O	CC1=C(CCOP(=O)(O)OP(=O)(O)O)SC(=[N+]1CC2=C(N)N=C(C)N=C2)C(C)O	InChI=1S/C14H22N4O8P2S/c1-8-12(4-5-25-28(23,24)26-27(20,21)22)29-14(9(2)19)18(8)7-11-6-16-10(3)17-13(11)15/h6,9,19H,4-5,7H2,1-3H3,(H4-,15,16,17,20,21,22,23,24)/p+1	-3.464	60.952	675	0.5	150	232.19	0.495	1
2-(cis-2-nonenyl-oxy)-5-pentyl-tetrahydrofuran								C18H34O2	282.462	AFC001614	RBUQQUQLIYFJPH-UHFFFAOYSA-N	CCCCCCC=CCOC1CCC(CCCCC)O1	InChI=1S/C18H34O2/c1-3-5-7-8-9-10-12-16-19-18-15-14-17(20-18)13-11-6-4-2/h10,12,17-18H,3-9,11,13-16H2,1-2H3	5.891	55.955	502	0.889	84	18.46	0.065	2
2-(cis-cis-3,6-nonadienyl-oxy)-5-pentyl-tetrahydrofuran								C18H32O2	280.446	AFC001615	NOWSFOHDHMDSDK-UHFFFAOYSA-N	CCC=CCC=CCCOC1CCC(CCCCC)O1	InChI=1S/C18H32O2/c1-3-5-7-8-9-10-12-16-19-18-15-14-17(20-18)13-11-6-4-2/h5,7,9-10,17-18H,3-4,6,8,11-16H2,1-2H3	5.312	54.621	502	0.778	84	18.46	0.066	2
2-(Dimethylazaniumyl)ethyl phosphate		C13482	HMDB0060244	25201906	58641	FDB031036		[C4H11NO4P]-	168.108	AFC001314	BLHVJAAEHMLMOI-UHFFFAOYSA-M	C[NH+](C)CCOP(=O)([O-])[O-]	InChI=1S/C4H12NO4P/c1-5(2)3-4-9-10(6,7)8/h3-4H2,1-2H3,(H2,6,7,8)/p-1	-3.258	22.313	87	1	42	86.67	0.516	0
2-(formylamino)benzoic acid	3342-77-6	C05653	HMDB0004089	101399	36575	FDB023309		C8H7NO3	165.146	AFC000502	LLLPDUXGHXIXIW-UHFFFAOYSA-N	C1=CC(=C(C=C1)NC=O)C(=O)O	InChI=1S/C8H7NO3/c10-5-9-7-4-2-1-3-6(7)8(11)12/h1-5H,(H,9,10)(H,11,12)	-0.286	22.254	112	0	54	66.4	0.402	0
2,3,6-trichlorohydroquinone	608-94-6	C07099		69103	28263			C6H3Cl3O2	213.446	AFC000446	ZIIRLFNUZROIBX-UHFFFAOYSA-N	C1=C(C(=C(C(=C1Cl)O)Cl)Cl)O	InChI=1S/C6H3Cl3O2/c7-2-1-3(10)4(8)5(9)6(2)11/h1,10-11H	1.383	20.704	89	0	54	40.46	0.191	0
2,3-butanedione	431-03-8	C00741	HMDB0003407	650	16583	FDB011930	LMFA12000012	C4H6O2	86.0894	AFC000087	QSJXEFYPDANLFS-UHFFFAOYSA-N	CC(=O)C(=O)C	InChI=1S/C4H6O2/c1-3(5)4(2)6/h1-2H3	-0.508	12.645	24	0.5	22	34.14	0.397	0
2,3-dihydroflavone	487-26-3	C00766		10251	5070			C15H12O2	224.255	AFC001936	ZONYXWQDUYMKFB-UHFFFAOYSA-N	C1=CC=C(C=C1)C2CC(=O)C3=C(C=CC=C3)O2	InChI=1S/C15H12O2/c16-13-10-15(11-6-2-1-3-7-11)17-14-9-5-4-8-12(13)14/h1-9,15H,10H2	1.535	36.006	259	0.133	90	26.3	0.117	0
2,3-dihydroxy-2,3-dihydrobenzoate				23615184	57576			[C7H7O4]-	155.128	AFC001277	INCSWYKICIYAHB-UHFFFAOYSA-M	C1=CC(C(C(=C1)C(=O)[O-])O)O	InChI=1S/C7H8O4/c8-5-3-1-2-4(6(5)9)7(10)11/h1-3,5-6,8-9H,(H,10,11)/p-1	-1.199	20.196	87	0.286	52	80.59	0.52	0
2,3-dihydroxy-3-methylvalerate	562-43-6	C04104	HMDB0012140	8	882	FDB030296	LMFA01050469	C6H12O4	148.157	AFC000002	PDGXJDXVGMHUIR-UHFFFAOYSA-N	CCC(C)(C(C(=O)O)O)O	InChI=1S/C6H12O4/c1-3-6(2,10)4(7)5(8)9/h4,7,10H,3H2,1-2H3,(H,8,9)	-0.093	21.77	68	0.833	44	77.76	0.525	0
2,3-dihydroxybenzoylserine	7724-78-9	C04204		151483	17455			C10H11NO6	241.198	AFC000561	VDTYHTVHFIIEIL-UHFFFAOYSA-N	C1=CC(=C(C(=C1)C(=O)NC(CO)C(=O)O)O)O	InChI=1S/C10H11NO6/c12-4-6(10(16)17)11-9(15)5-2-1-3-7(13)8(5)14/h1-3,6,12-14H,4H2,(H,11,15)(H,16,17)	-1.396	30.847	215	0.2	80	127.09	0.527	0
2,3-dimethyl-6-phytylhydroquinone		C15883		71768102	75921			C28H48O2	416.681	AFC001469	SUFZKUBNOVDJRR-UHFFFAOYSA-N	CC(C)CCCC(C)CCCC(C)CCCC(=CCC1=C(C(=C(C)C(=C1)O)C)O)C	InChI=1S/C28H48O2/c1-20(2)11-8-12-21(3)13-9-14-22(4)15-10-16-23(5)17-18-26-19-27(29)24(6)25(7)28(26)30/h17,19-22,29-30H,8-16,18H2,1-7H3	9.217	82.89	934	0.714	138	40.46	0.097	2
2,3-dioxo-L-gulonate	3445-22-5	C04575	HMDB0005971	440390;21145097	57441	FDB023950		[C6H7O7]-	191.116	AFC001257	GJQWCDSAOUMKSE-UHFFFAOYSA-M	C(C(C(C(=O)C(=O)C(=O)[O-])O)O)O	InChI=1S/C6H8O7/c7-1-2(8)3(9)4(10)5(11)6(12)13/h2-3,7-9H,1H2,(H,12,13)/p-1	-2.915	20.842	127	0.5	56	134.96	0.707	0
2,3-diphosphoglycerate	138-81-8	C03339	HMDB0001294	61	28907	FDB022538		C3H8O10P2	266.037	AFC000008	XOHUEYCVLUUEJJ-UHFFFAOYSA-N	C(C(C(=O)O)OP(=O)(O)O)OP(=O)(O)O	InChI=1S/C3H8O10P2/c4-3(5)2(13-15(9,10)11)1-12-14(6,7)8/h2H,1H2,(H,4,5)(H2,6,7,8)(H2,9,10,11)	-2.82	25.894	157	0.667	70	190.44	0.716	0
2,3-epoxygerianial				534994	67258			C10H16O2	168.233	AFC000800	KXDDDNKGVUBFQS-UHFFFAOYSA-N	CC(=CCCC1(C)C(C=O)O1)C	InChI=1S/C10H16O2/c1-8(2)5-4-6-10(3)9(7-11)12-10/h5,7,9H,4,6H2,1-3H3	2.091	29.873	145	0.7	58	29.6	0.176	0
2,3-oxidosqualene	7200-26-2	C01054	HMDB0001188	5366020	78662	FDB022476		C30H50O	426.719	AFC001031	QYIMSPSDBYKPPY-UHFFFAOYSA-N	CC(=CCCC(=CCCC(=CCCC=C(C)CCC=C(C)CCC1C(C)(C)O1)C)C)C	InChI=1S/C30H50O/c1-24(2)14-11-17-27(5)20-12-18-25(3)15-9-10-16-26(4)19-13-21-28(6)22-23-29-30(7,8)31-29/h14-16,20-21,29H,9-13,17-19,22-23H2,1-8H3	10.03	86.942	1103	0.667	142	12.53	0.029	2
2,3-pentanedione	600-14-6		HMDB0031598	11747	52774	FDB008229		C5H8O2	100.116	AFC000344	TZMFJUDUGYTVRY-UHFFFAOYSA-N	CCC(=O)C(=O)C	InChI=1S/C5H8O2/c1-3-5(7)4(2)6/h3H2,1-2H3	0.159	15.738	36	0.6	26	34.14	0.341	0
2,4-dinitrophenyl-S-glutathione	26289-39-4	C11175		25322932	133977	FDB030300		[C16H18N5O10S]-	472.408	AFC001366	FXEUKVKGTKDDIQ-UHFFFAOYSA-M	C1=C(C=C(C(=C1)SCC(C(=O)NCC(=O)[O-])NC(=O)CCC(C(=O)[O-])[NH3+])[N+](=O)[O-])[N+](=O)[O-]	InChI=1S/C16H19N5O10S/c17-9(16(26)27)2-4-13(22)19-10(15(25)18-6-14(23)24)7-32-12-3-1-8(20(28)29)5-11(12)21(30)31/h1,3,5,9-10H,2,4,6-7,17H2,(H,18,25)(H,19,22)(H,23,24)(H,26,27)/p-1	-3.757	56.582	735	0.375	150	277.68	0.588	1
2,4-heptadienal	4313-03-5			5283321	132837	FDB029656	LMFA06000024	C7H10O	110.154	AFC000971	SATICYYAWWYRAM-UHFFFAOYSA-N	CCC=CC=CC=O	InChI=1S/C7H10O/c1-2-3-4-5-6-7-8/h3-7H,2H2,1H3	1.841	19.79	74	0.286	26	17.07	0.155	0
2,4-hexadienal	142-83-6	C19249	HMDB0034729	637564	82334	FDB013895	LMFA06000006	C6H8O	96.1273	AFC000807	BATOPAZDIZEVQF-UHFFFAOYSA-N	CC=CC=CC=O	InChI=1S/C6H8O/c1-2-3-4-5-6-7/h2-6H,1H3	1.385	16.696	54	0.167	22	17.07	0.178	0
2,5-diamino-6-(5-phospho-D-ribosylamino)pyrimidin-4(3H)-one		C01304		135398601	29114			C9H16N5O8P	353.226	AFC001558	OCLCLRXKNJCOJD-UHFFFAOYSA-N	C(C1C(C(C(NC2=C(C(=O)NC(=N2)N)N)O1)O)O)OP(=O)(O)O	InChI=1S/C9H16N5O8P/c10-3-6(13-9(11)14-7(3)17)12-8-5(16)4(15)2(22-8)1-21-23(18,19)20/h2,4-5,8,15-16H,1,10H2,(H2,18,19,20)(H4,11,12,13,14,17)	-4.397	42.055	409	0.556	120	231.79	0.656	2
2,6-diaminopimelic acid	583-93-7	C00666	HMDB0001370	865	23673	FDB030951	LMFA01170102	C7H14N2O4	190.197	AFC000842	GMKMEZVLHJARHF-UHFFFAOYSA-N	C(CC(C(=O)O)N)CC(C(=O)O)N	InChI=1S/C7H14N2O4/c8-4(6(10)11)2-1-3-5(9)7(12)13/h4-5H,1-3,8-9H2,(H,10,11)(H,12,13)	-0.982	27.063	152	0.714	54	126.64	0.666	0
2,6-dimethylhept-5-enal	106-72-9		HMDB0031834	61016		FDB008513	LMFA06000127	C9H16O	140.223	AFC000418	YGFGZTXGYTUXBA-UHFFFAOYSA-N	CC(=CCCC(C)C=O)C	InChI=1S/C9H16O/c1-8(2)5-4-6-9(3)7-10/h5,7,9H,4,6H2,1-3H3	2.774	27.311	98	0.667	38	17.07	0.122	0
2,7-dimethyl-1-octanol	15250-22-3			27154				C10H22O	158.281	AFC000400	FNLOIWOIWFHQSI-UHFFFAOYSA-N	CC(C)CCCCC(C)CO	InChI=1S/C10H22O/c1-9(2)6-4-5-7-10(3)8-11/h9-11H,4-8H2,1-3H3	3.367	33.071	124	1	42	20.23	0.128	0
2-[(1R,6S)-1,6-dihydroxycyclohexa-2,4-dien-1-yl]acetyl-CoA				90658457				[C29H40N7O19P3S]4-	915.652	AFC001491	FGLOXTAZEAOLJK-UHFFFAOYSA-J	CC(C)(COP(=O)([O-])OP(=O)([O-])OCC1C(C(C(N2C=NC3=C2N=CN=C3N)O1)O)OP(=O)([O-])[O-])C(C(=O)NCCC(=O)NCCSC(=O)CC4(C=CC=CC4O)O)O	InChI=1S/C29H44N7O19P3S/c1-28(2,23(41)26(42)32-8-6-18(38)31-9-10-59-19(39)11-29(43)7-4-3-5-17(29)37)13-52-58(49,50)55-57(47,48)51-12-16-22(54-56(44,45)46)21(40)27(53-16)36-15-35-20-24(30)33-14-34-25(20)36/h3-5,7,14-17,21-23,27,37,40-41,43H,6,8-13H2,1-2H3,(H,31,38)(H,32,42)(H,47,48)(H,49,50)(H2,30,33,34)(H2,44,45,46)/p-4	-7.046	114.44	3011	0.586	310	466.86	0.51	4
2‚Ä≥-O-pentosyl-6-C-hexosylluteolin								C26H30O15	582.508	AFC001775	IYUAQQAWAWYQSG-UHFFFAOYSA-N	C1=C(C=C(C(=C1)O)O)C2CC(=O)C3=C(C=C(C(=C3O2)C4C(C(C(C(CO)O4)O)O)OC5C(C(C(CO5)O)O)O)O)O	InChI=1S/C26H30O15/c27-6-16-20(35)21(36)25(41-26-22(37)19(34)14(33)7-38-26)24(40-16)18-12(31)4-11(30)17-13(32)5-15(39-23(17)18)8-1-2-9(28)10(29)3-8/h1-4,14-16,19-22,24-31,33-37H,5-7H2	-4.385	77.794	1063	0.5	226	256.29	0.44	3
2‚Äô-deoxyinosine	890-38-0	C05512	HMDB0000071	135398593	28997	FDB012323		C10H12N4O4	252.227	AFC001556	VGONTNSXDCQUGY-UHFFFAOYSA-N	C1C(C(CO)OC1N2C=NC3=C2N=CNC3=O)O	InChI=1S/C10H12N4O4/c15-2-6-5(16)1-7(18-6)14-4-13-8-9(14)11-3-12-10(8)17/h3-7,15-16H,1-2H2,(H,11,12,17)	-2.064	33.21	275	0.5	98	106.75	0.423	0
22,23-dihydrobrassicasterol	4651-51-8	C01789	HMDB0002869	5283637	19809	FDB012521	LMST01030096	C28H48O	400.681	AFC000601	SGNBVLSWZMBQTH-UHFFFAOYSA-N	CC(C)C(C)CCC(C)C1CCC2C3CC=C4CC(CCC4(C)C3CCC12C)O	InChI=1S/C28H48O/c1-18(2)19(3)7-8-20(4)24-11-12-25-23-10-9-21-17-22(29)13-15-27(21,5)26(23)14-16-28(24,25)6/h9,18-20,22-26,29H,7-8,10-17H2,1-6H3	7.628	82.088	696	0.929	164	20.23	0.051	1
22-hydroxydocosanoate	506-45-6	C19623		5282922;17802799	76304;76322	FDB007075	LMFA01050079	[C22H43O3]-	355.576	AFC001248	IBPVZXPSTLXWCG-UHFFFAOYSA-M	C(CCCCCCCCCCC(=O)[O-])CCCCCCCCCCO	InChI=1S/C22H44O3/c23-21-19-17-15-13-11-9-7-5-3-1-2-4-6-8-10-12-14-16-18-20-22(24)25/h23H,1-21H2,(H,24,25)/p-1	7.201	69.798	839	0.955	96	60.36	0.17	2
22-oxo-docosanoate				52940144	76298			[C22H41O3]-	353.56	AFC001438	PYBWSGBQPKXKOQ-UHFFFAOYSA-M	C(CCCCCCCCCCC(=O)[O-])CCCCCCCCCC=O	InChI=1S/C22H42O3/c23-21-19-17-15-13-11-9-7-5-3-1-2-4-6-8-10-12-14-16-18-20-22(24)25/h21H,1-20H2,(H,24,25)/p-1	7.171	68.465	839	0.909	96	57.2	0.162	2
24,25-dihydrolanosterol	79-62-9	C05109	HMDB0006839	440560	28113	FDB004614	LMST01010087	C30H52O	428.734	AFC000717	MBZYKEVPFYHDOH-UHFFFAOYSA-N	CC(C)CCCC(C)C1CCC2(C)C3=C(CCC12C)C4(C)CCC(C(C)(C)C4CC3)O	InChI=1S/C30H52O/c1-20(2)10-9-11-21(3)22-14-18-30(8)24-12-13-25-27(4,5)26(31)16-17-28(25,6)23(24)15-19-29(22,30)7/h20-22,25-26,31H,9-19H2,1-8H3	8.37	88.275	740	0.933	180	20.23	0.047	1
24-beta-ethyl-25-(27)-dehydrolophenol						FDB004919		C31H52O	440.745	AFC001632	REZSTVIVCXEZAB-UHFFFAOYSA-N	CCC(CCC(C)C1CCC2C3=CCC4C(C)C(CCC4(C)C3CCC12C)OC)C(=C)C	InChI=1S/C31H52O/c1-9-23(20(2)3)11-10-21(4)25-14-15-27-24-12-13-26-22(5)29(32-8)17-19-31(26,7)28(24)16-18-30(25,27)6/h12,21-23,25-29H,2,9-11,13-19H2,1,3-8H3	8.616	90.035	814	0.871	178	9.23	0.021	1
24-beta-ethyl-lophenol						FDB004613	LMST01040242	C31H54O	442.761	AFC001633	KTJSODSHDASMSC-UHFFFAOYSA-N	CCC(CCC(C)C1CCC2C3=CCC4C(C)C(CCC4(C)C3CCC12C)OC)C(C)C	InChI=1S/C31H54O/c1-9-23(20(2)3)11-10-21(4)25-14-15-27-24-12-13-26-22(5)29(32-8)17-19-31(26,7)28(24)16-18-30(25,27)6/h12,20-23,25-29H,9-11,13-19H2,1-8H3	8.812	91.369	814	0.935	178	9.23	0.021	1
24-ethyl-5alpha-cholest-7-en-3beta-ol	521-03-9	C08839	HMDB0033214	131751392	9049	FDB006390		C29H50O	414.708	AFC001541	YSKVBPGQYRAUQO-UHFFFAOYSA-N	CCC(CCC(C)C1CCC2C3=CCC4CC(CCC4(C)C3CCC12C)O)C(C)C	InChI=1S/C29H50O/c1-7-21(19(2)3)9-8-20(4)25-12-13-26-24-11-10-22-18-23(30)14-16-28(22,5)27(24)15-17-29(25,26)6/h11,19-23,25-27,30H,7-10,12-18H2,1-6H3	8.084	85.182	725	0.931	168	20.23	0.049	1
24-hydroxy-3-oxocholest-4-en-26-oyl-CoA				90658714		FDB030372		[C48H72N7O19P3S]4-	1176.11	AFC001493	LPAPCIXIEIQRQA-UHFFFAOYSA-J	CC(CCC(C(C)C(=O)SCCNC(=O)CCNC(=O)C(C(C)(C)COP(=O)([O-])OP(=O)([O-])OCC1C(C(C(N2C=NC3=C2N=CN=C3N)O1)O)OP(=O)([O-])[O-])O)O)C4CCC5C6CCC7=CC(=O)CCC7(C)C6CCC45C	InChI=1S/C48H76N7O19P3S/c1-26(31-10-11-32-30-9-8-28-21-29(56)13-16-47(28,5)33(30)14-17-48(31,32)6)7-12-34(57)27(2)45(62)78-20-19-50-36(58)15-18-51-43(61)40(60)46(3,4)23-71-77(68,69)74-76(66,67)70-22-35-39(73-75(63,64)65)38(59)44(72-35)55-25-54-37-41(49)52-24-53-42(37)55/h21,24-27,30-35,38-40,44,57,59-60H,7-20,22-23H2,1-6H3,(H,50,58)(H,51,61)(H,66,67)(H,68,69)(H2,49,52,53)(H2,63,64,65)/p-4	-1.244	169.217	5444	0.771	426	463.7	0.395	4
24-hydroxy-beta-amyrin		C19732		14167253	62459			C30H50O2	442.718	AFC001220	NTWLPZMPTFQYQI-UHFFFAOYSA-N	CC1(C)CCC2(C)CCC3(C)C(=CCC4C5(C)CCC(C(C)(CO)C5CCC43C)O)C2C1	InChI=1S/C30H50O2/c1-25(2)14-15-26(3)16-17-29(6)20(21(26)18-25)8-9-23-27(4)12-11-24(32)28(5,19-31)22(27)10-13-30(23,29)7/h8,21-24,31-32H,9-19H2,1-7H3	6.213	87.744	650	0.933	198	40.46	0.091	1
24-methyldesmosterol	20780-41-0			193567		FDB030373	LMST01030110	C28H46O	398.665	AFC000619	YTFTXKBJICNYCV-UHFFFAOYSA-N	CC(=C(C)CCC(C)C1CCC2C3CC=C4CC(CCC4(C)C3CCC12C)O)C	InChI=1S/C28H46O/c1-18(2)19(3)7-8-20(4)24-11-12-25-23-10-9-21-17-22(29)13-15-27(21,5)26(23)14-16-28(24,25)6/h9,20,22-26,29H,7-8,10-17H2,1-6H3	7.573	80.754	696	0.857	164	20.23	0.051	1
24-methylenecholesterol	474-63-5	C15781	HMDB0006849	92113	19812	FDB001361	LMST01030099	C28H46O	398.665	AFC000477	INDVLXYUCBVVKW-UHFFFAOYSA-N	CC(C)C(=C)CCC(C)C1CCC2C3CC=C4CC(CCC4(C)C3CCC12C)O	InChI=1S/C28H46O/c1-18(2)19(3)7-8-20(4)24-11-12-25-23-10-9-21-17-22(29)13-15-27(21,5)26(23)14-16-28(24,25)6/h9,18,20,22-26,29H,3,7-8,10-17H2,1-2,4-6H3	7.432	80.754	696	0.857	164	20.23	0.051	1
24-methylenecycloartane-3,28-diol		C22114		52953106	142917			C31H52O2	456.745	AFC001441	FQXKPPBUTHZNET-UHFFFAOYSA-N	CC(C)C(=C)CCC(C)C1CCC2(C)C3CCC4C(C)(CO)C(CCC54CC35CCC12C)O	InChI=1S/C31H52O2/c1-20(2)21(3)8-9-22(4)23-12-14-29(7)25-11-10-24-27(5,19-32)26(33)13-15-30(24)18-31(25,30)17-16-28(23,29)6/h20,22-26,32-33H,3,8-19H2,1-2,4-7H3	6.769	90.837	816	0.935	200	40.46	0.089	1
24-methylenecycloartanol	1449-09-8	C08830	HMDB0037236	94204	1307	FDB014438	LMST01100001	C31H52O	440.745	AFC000495	BDHQMRXFDYJGII-UHFFFAOYSA-N	CC(C)C(=C)CCC(C)C1CCC2(C)C3CCC4C(C)(C)C(CCC54CC35CCC12C)O	InChI=1S/C31H52O/c1-20(2)21(3)9-10-22(4)23-13-15-29(8)25-12-11-24-27(5,6)26(32)14-16-30(24)19-31(25,30)18-17-28(23,29)7/h20,22-26,32H,3,9-19H2,1-2,4-8H3	7.859	90.035	787	0.935	196	20.23	0.046	1
24-methylenelophenol	1176-52-9	C11522	HMDB0006846	5283640	29107	FDB011547	LMST01030100	C29H48O	412.692	AFC000982	RSMKYRDCCSNYFM-UHFFFAOYSA-N	CC(C)C(=C)CCC(C)C1CCC2C3=CCC4C(C)C(CCC4(C)C3CCC12C)O	InChI=1S/C29H48O/c1-18(2)19(3)8-9-20(4)23-12-13-25-22-10-11-24-21(5)27(30)15-17-29(24,7)26(22)14-16-28(23,25)6/h10,18,20-21,23-27,30H,3,8-9,11-17H2,1-2,4-7H3	7.751	83.848	723	0.862	170	20.23	0.049	1
24-methyl-lathosterol						FDB004407		C28H48O	400.681	AFC001503	PUGBZUWUTZUUCP-UHFFFAOYSA-N	CC(C)C(C)CCC(C)C1CCC2C3=CCC4CC(CCC4(C)C3CCC12C)O	InChI=1S/C28H48O/c1-18(2)19(3)7-8-20(4)24-11-12-25-23-10-9-21-17-22(29)13-15-27(21,5)26(23)14-16-28(24,25)6/h10,18-22,24-26,29H,7-9,11-17H2,1-6H3	7.628	82.088	696	0.929	164	20.23	0.051	1
25-dehydrochondrillasterol			HMDB0034196	16058081		FDB004921;FDB012492		C29H46O	410.676	AFC001005	IMWBKGMKWXIXEQ-UHFFFAOYSA-N	CCC(C=CC(C)C1CCC2C3=CCC4CC(CCC4(C)C3CCC12C)O)C(=C)C	InChI=1S/C29H46O/c1-7-21(19(2)3)9-8-20(4)25-12-13-26-24-11-10-22-18-23(30)14-16-28(22,5)27(24)15-17-29(25,26)6/h8-9,11,20-23,25-27,30H,2,7,10,12-18H2,1,3-6H3	7.443	82.514	725	0.793	168	20.23	0.049	1
25-dehydrofungisterol	95043-18-8		HMDB0038655	74051264		FDB018051		C28H46O	398.665	AFC001471	ALAYAXMTAIVXMW-UHFFFAOYSA-N	C=C(C)C(C)CCC(C)C1CCC2C3=CCC4CC(CCC4(C)C3CCC12C)O	InChI=1S/C28H46O/c1-18(2)19(3)7-8-20(4)24-11-12-25-23-10-9-21-17-22(29)13-15-27(21,5)26(23)14-16-28(24,25)6/h10,19-22,24-26,29H,1,7-9,11-17H2,2-6H3	7.432	80.754	696	0.857	164	20.23	0.051	1
25-dehydroporiferasterol				146158414		FDB004923		C29H46O	410.676	AFC001603	ZTJFINKUHDHOSM-UHFFFAOYSA-N	CCC(C=CC(C)C1CCC2C3CC=C4CC(CCC4(C)C3CCC12C)O)C(=C)C	InChI=1S/C29H46O/c1-7-21(19(2)3)9-8-20(4)25-12-13-26-24-11-10-22-18-23(30)14-16-28(22,5)27(24)15-17-29(25,26)6/h8-10,20-21,23-27,30H,2,7,11-18H2,1,3-6H3	7.443	82.514	725	0.793	168	20.23	0.049	1
26,27-dehydrozymosterol				91820155	136770			C27H42O	382.623	AFC001505	PARCYOHVCUKSCA-UHFFFAOYSA-N	CC(CCC=C1CC1)C2CCC3C4=C(CCC23C)C5(C)CCC(CC5CC4)O	InChI=1S/C27H42O/c1-18(5-4-6-19-7-8-19)23-11-12-24-22-10-9-20-17-21(28)13-15-26(20,2)25(22)14-16-27(23,24)3/h6,18,20-21,23-24,28H,4-5,7-17H2,1-3H3	6.949	76.327	699	0.852	164	20.23	0.053	1
2-aceto-2-hydroxybutanoate	3142-65-2	C00659	HMDB0006900	21	982	FDB024147	LMFA01050501	C6H10O4	146.141	AFC000004	VUQLHQFKACOHNZ-UHFFFAOYSA-N	CCC(C(=O)C)(C(=O)O)O	InChI=1S/C6H10O4/c1-3-6(10,4(2)7)5(8)9/h10H,3H2,1-2H3,(H,8,9)	-0.276	20.436	55	0.667	44	74.6	0.511	0
2-amino-3-(3-methylimidazol-4-yl)propanoic acid		C03298	HMDB0000479	7017993	50601	FDB021798		C7H11N3O2	169.181	AFC001860	JDHILDINMRGULE-UHFFFAOYSA-N	CN1C=NC=C1C[C@H](C(=O)[O-])[NH3+]	InChI=1S/C7H11N3O2/c1-10-4-9-3-5(10)2-6(8)7(11)12/h3-4,6H,2,8H2,1H3,(H,11,12)	-3.604	24.559	117	0.429	56	83.37	0.493	0
2-amino-5-formylamino-6-(5-phospho-D-ribosylamino)pyrimidin-4(3H)-one		C15563		135911923	57258			[C10H14N5O9P]2-	379.22	AFC001594	VKMYTDDVUBGBDH-UHFFFAOYSA-L	C(C1C(C(C(NC2=C(C(=O)NC(=N2)N)NC=O)O1)O)O)OP(=O)([O-])[O-]	InChI=1S/C10H16N5O9P/c11-10-14-7(4(12-2-16)8(19)15-10)13-9-6(18)5(17)3(24-9)1-23-25(20,21)22/h2-3,5-6,9,17-18H,1H2,(H,12,16)(H2,20,21,22)(H4,11,13,14,15,19)/p-2	-5.122	43.283	477	0.5	128	240.53	0.635	2
2-aminoadipic acid	542-32-5	C00956	HMDB0000510	469	37024	FDB021812	LMFA01170098	C6H11NO4	161.156	AFC000069	OYIFNHCXNCRBQI-UHFFFAOYSA-N	C(CC(C(=O)O)N)CC(=O)O	InChI=1S/C6H11NO4/c7-4(6(10)11)2-1-3-5(8)9/h4H,1-3,7H2,(H,8,9)(H,10,11)	-0.468	22.203	111	0.667	44	100.62	0.625	0
2-aminoethyl dihydrogen phosphate	1071-23-4	C00346	HMDB0000224	1015	17553	FDB021911		C2H8NO4P	141.063	AFC000157	SUHOOTKUPISOBE-UHFFFAOYSA-N	C(COP(=O)(O)O)N	InChI=1S/C2H8NO4P/c3-1-2-7-8(4,5)6/h1-3H2,(H2,4,5,6)	-1.997	16.792	56	1	32	102.59	0.727	0
2-aminoisobutyric acid	62-57-7	C03665	HMDB0001906	6119	27971	FDB022732	LMFA01100053	C4H9NO2	103.12	AFC001840	FUOOLUPWFVMBKG-UHFFFAOYSA-N	CC(C)(C(=O)O)N	InChI=1S/C4H9NO2/c1-4(2,5)3(6)7/h5H2,1-2H3,(H,6,7)	-0.396	15.745	29	0.75	30	63.32	0.614	0
2-aminooctadec-4-ene-1,3-diol	123-78-4	C00319	HMDB0000252	5280335	46964	FDB021919	LMSP01010001	C18H37NO2	299.493	AFC000869	WWUZIQQURGPMPG-UHFFFAOYSA-N	CCCCCCCCCCCCCC=CC(C(CO)N)O	InChI=1S/C18H37NO2/c1-2-3-4-5-6-7-8-9-10-11-12-13-14-15-18(21)17(19)16-20/h14-15,17-18,20-21H,2-13,16,19H2,1H3	4.825	59.055	550	0.889	82	66.48	0.222	2
2-benzyl-oxy-5-pentyl-tetrahydrofuran								C17H26O3	278.387	AFC001617	JCNKJRWUXUAACA-UHFFFAOYSA-N	CCCCCCOC1CCC(OCC2=CC=CC=C2)O1	InChI=1S/C17H26O3/c1-2-3-4-8-13-18-16-11-12-17(20-16)19-14-15-9-6-5-7-10-15/h5-7,9-10,16-17H,2-4,8,11-14H2,1H3	3.49	49.663	470	0.647	92	27.69	0.1	0
2-carboxy-L-threo-pentonate				146170827	149765	FDB030326		[C6H8O8]2-	208.123	AFC001484	CQIRJDZGDXTXKF-UHFFFAOYSA-L	C(C(C(C(C(=O)[O-])(C(=O)[O-])O)O)O)O	InChI=1S/C6H10O8/c7-1-2(8)3(9)6(14,4(10)11)5(12)13/h2-3,7-9,14H,1H2,(H,10,11)(H,12,13)/p-2	-4.051	22.31	121	0.667	64	161.18	0.775	0
2-carboxy-L-xylonolactone				90658445		FDB030327		[C6H7O7]-	191.116	AFC001490	ZNJUNWARRIXWAA-UHFFFAOYSA-M	C(C1C(C(C(=O)[O-])(C(=O)O1)O)O)O	InChI=1S/C6H8O7/c7-1-2-3(8)6(12,4(9)10)5(11)13-2/h2-3,7-8,12H,1H2,(H,9,10)/p-1	-2.764	20.842	114	0.667	66	127.12	0.665	0
2-carboxymethyl-3-hydroxyphenylpropionyl-CoA			HMDB0012145	53481380		FDB028802		C32H46N7O20P3S	973.731	AFC001443	DVSQFPLMOLPRDU-UHFFFAOYSA-N	CC(C)(COP(=O)(O)OP(=O)(O)OCC1C(C(C(N2C=NC3=C2N=CN=C3N)O1)O)OP(=O)(O)O)C(C(=O)NCCC(=O)NCCSC(=O)C(CC(=O)O)C(C4=CC=CC=C4)O)O	InChI=1S/C32H46N7O20P3S/c1-32(2,26(45)29(46)35-9-8-20(40)34-10-11-63-31(47)18(12-21(41)42)23(43)17-6-4-3-5-7-17)14-56-62(53,54)59-61(51,52)55-13-19-25(58-60(48,49)50)24(44)30(57-19)39-16-38-22-27(33)36-15-37-28(22)39/h3-7,15-16,18-19,23-26,30,43-45H,8-14H2,1-2H3,(H,34,40)(H,35,46)(H,41,42)(H,51,52)(H,53,54)(H2,33,36,37)(H2,48,49,50)	-5.078	124.522	3326	0.531	326	472.61	0.486	4
2-cis-abscisate				24798705	62432	FDB030331		[C15H19O4]-	263.31	AFC001294	JLIDBLDQVAYHNE-UHFFFAOYSA-M	CC(=CC(=O)[O-])C=CC1(C(=CC(=O)CC1(C)C)C)O	InChI=1S/C15H20O4/c1-10(7-13(17)18)5-6-15(19)11(2)8-12(16)9-14(15,3)4/h5-8,19H,9H2,1-4H3,(H,17,18)/p-1	1.319	42.277	287	0.467	96	77.43	0.294	0
2-C-methyl-D-erythritol-2,4-cyclodiphosphate				21605869	58483	FDB030324		[C5H10O9P2]2-	276.075	AFC001263	SFRQRNJMIIUYDI-UHFFFAOYSA-L	CC1(CO)C(COP(=O)([O-])OP(=O)([O-])O1)O	InChI=1S/C5H12O9P2/c1-5(3-6)4(7)2-12-15(8,9)14-16(10,11)13-5/h4,6-7H,2-3H2,1H3,(H,8,9)(H,10,11)/p-2	-3.236	29.946	164	1	84	168.03	0.609	0
2-C-methyl-D-erythritol-4-phosphate				21608483	58262	FDB030325		[C5H11O7P]2-	214.111	AFC001264	XMWHRVNVKDKBRG-UHFFFAOYSA-L	CC(CO)(C(COP(=O)([O-])[O-])O)O	InChI=1S/C5H13O7P/c1-5(8,3-6)4(7)2-12-13(9,10)11/h4,6-8H,2-3H2,1H3,(H2,9,10,11)/p-2	-3.192	25.379	131	1	60	142.92	0.668	0
2-decenal	3913-71-1		HMDB0030999	5283345	133455	FDB002987	LMFA06000053	C10H18O	154.25	AFC000976	MMFCJPPRCYDLLZ-UHFFFAOYSA-N	CCCCCCCC=CC=O	InChI=1S/C10H18O/c1-2-3-4-5-6-7-8-9-10-11/h8-10H,2-7H2,1H3	3.655	30.404	150	0.7	38	17.07	0.111	0
2-dehydropantoate	470-30-4	C00966		38	17094	FDB030332		C6H10O4	146.141	AFC000005	PKVVTUWHANFMQC-UHFFFAOYSA-N	CC(C)(CO)C(=O)C(=O)O	InChI=1S/C6H10O4/c1-6(2,3-7)4(8)5(9)10/h7H,3H2,1-2H3,(H,9,10)	-0.038	20.436	68	0.667	44	74.6	0.511	0
2'-deoxyadenosine-5'-diphosphate	2793-06-8	C00206	HMDB0001508	188966	16174	FDB022662		C10H15N5O9P2	411.202	AFC000610	DAEAPNUQQAICNR-UHFFFAOYSA-N	C1C(C(COP(=O)(O)OP(=O)(O)O)OC1N2C=NC3=C2N=CN=C3N)O	InChI=1S/C10H15N5O9P2/c11-9-8-10(13-3-12-9)15(4-14-8)7-1-5(16)6(23-7)2-22-26(20,21)24-25(17,18)19/h3-7,16H,1-2H2,(H,20,21)(H2,11,12,13)(H2,17,18,19)	-3.63	47.58	562	0.5	142	228.71	0.556	1
2'-deoxyadenosine-5'-triphosphate	1927-31-7	C00131	HMDB0001532	15993	16284	FDB022674		C10H16N5O12P3	491.182	AFC000370	SUYVUBYJARFZHO-UHFFFAOYSA-N	C1C(C(COP(=O)(O)OP(=O)(O)OP(=O)(O)O)OC1N2C=NC3=C2N=CN=C3N)O	InChI=1S/C10H16N5O12P3/c11-9-8-10(13-3-12-9)15(4-14-8)7-1-5(16)6(25-7)2-24-29(20,21)27-30(22,23)26-28(17,18)19/h3-7,16H,1-2H2,(H,20,21)(H,22,23)(H2,11,12,13)(H2,17,18,19)	-4.44	54.283	747	0.5	164	285.05	0.581	2
2'-deoxycytidine-5'-monophosphate	1032-65-1	C00239	HMDB0001202	13945	15918	FDB022488		C9H14N3O7P	307.197	AFC000366	NCMVOABPESMRCP-UHFFFAOYSA-N	C1=CN(C2CC(C(COP(=O)(O)O)O2)O)C(=O)N=C1N	InChI=1S/C9H14N3O7P/c10-7-1-2-12(9(14)11-7)8-3-5(13)6(19-8)4-18-20(15,16)17/h1-2,5-6,8,13H,3-4H2,(H2,10,11,14)(H2,15,16,17)	-2.44	37.719	346	0.556	104	164.72	0.536	0
2'-deoxycytidine-5'-triphosphate	2056-98-6	C00458	HMDB0000998	65091	16311	FDB022359		C9H16N3O13P3	467.157	AFC000429	RGWHQCVHVJXOKC-UHFFFAOYSA-N	C1=CN(C2CC(C(COP(=O)(O)OP(=O)(O)OP(=O)(O)O)O2)O)C(=O)N=C1N	InChI=1S/C9H16N3O13P3/c10-7-1-2-12(9(14)11-7)8-3-5(13)6(23-8)4-22-27(18,19)25-28(20,21)24-26(15,16)17/h1-2,5-6,8,13H,3-4H2,(H,18,19)(H,20,21)(H2,10,11,14)(H2,15,16,17)	-4.06	51.125	663	0.556	148	277.4	0.594	2
2'-deoxyguanosine-5'-diphosphate	3493-09-2	C00361	HMDB0000960	135398595	28862	FDB022338		C10H15N5O10P2	427.202	AFC001557	CIKGWCTVFSRMJU-UHFFFAOYSA-N	C1C(C(COP(=O)(O)OP(=O)(O)O)OC1N2C=NC3=C2N=C(N)NC3=O)O	InChI=1S/C10H15N5O10P2/c11-10-13-8-7(9(17)14-10)12-3-15(8)6-1-4(16)5(24-6)2-23-27(21,22)25-26(18,19)20/h3-6,16H,1-2H2,(H,21,22)(H2,18,19,20)(H3,11,13,14,17)	-3.816	48.382	587	0.5	148	245.45	0.575	2
2'-deoxyguanosine-5'-triphosphate	2564-35-4	C00286	HMDB0001440	135402022	16497	FDB022623		C10H16N5O13P3	507.181	AFC001583	HAAZLUGHYHWQIW-UHFFFAOYSA-N	C1C(C(COP(=O)(O)OP(=O)(O)OP(=O)(O)O)OC1N2C=NC3=C2N=C(N)NC3=O)O	InChI=1S/C10H16N5O13P3/c11-10-13-8-7(9(17)14-10)12-3-15(8)6-1-4(16)5(26-6)2-25-30(21,22)28-31(23,24)27-29(18,19)20/h3-6,16H,1-2H2,(H,21,22)(H,23,24)(H2,18,19,20)(H3,11,13,14,17)	-4.626	55.085	776	0.5	170	301.79	0.595	3
2'deoxy-thymidine-5'-diphospho-alpha-D-glucose	2196-62-5	C00842	HMDB0001328	443210	15700	FDB022557		C16H26N2O16P2	564.33	AFC000746	YSYKRGRSMLTJNL-UHFFFAOYSA-N	CC1=CN(C2CC(C(COP(=O)(O)OP(=O)(O)OC3C(C(C(C(CO)O3)O)O)O)O2)O)C(=O)NC1=O	InChI=1S/C16H26N2O16P2/c1-6-3-18(16(25)17-14(6)24)10-2-7(20)9(31-10)5-30-35(26,27)34-36(28,29)33-15-13(23)12(22)11(21)8(4-19)32-15/h3,7-13,15,19-23H,2,4-5H2,1H3,(H,26,27)(H,28,29)(H,17,24,25)	-4.605	67.789	1059	0.75	192	290.93	0.516	3
2'-deoxyuridine 5'-monophosphate	964-26-1	C00365	HMDB0001409	65063	17622	FDB022604		C9H13N2O8P	308.182	AFC000427	JSRLJPSBLDHEIO-UHFFFAOYSA-N	C1=CN(C2CC(C(COP(=O)(O)O)O2)O)C(=O)NC1=O	InChI=1S/C9H13N2O8P/c12-5-3-8(11-2-1-7(13)10-9(11)14)19-6(5)4-18-20(15,16)17/h1-2,5-6,8,12H,3-4H2,(H,10,13,14)(H2,15,16,17)	-2.494	36.754	346	0.556	104	155.44	0.505	0
2-ethoxy5-pentyl-tetrahydrofuran								C11H22O2	186.292	AFC001618	KDJQBQSGBIXHLV-UHFFFAOYSA-N	CCCCCC1CCC(OCC)O1	InChI=1S/C11H22O2/c1-3-5-6-7-10-8-9-11(13-10)12-4-2/h10-11H,3-9H2,1-2H3	2.94	35.633	188	1	56	18.46	0.099	0
2-ethyl hexenal	645-62-5		HMDB0061945	12582	88838			C8H14O	126.196	AFC000360	PYLMCYQHBRSDND-UHFFFAOYSA-N	CCCC=C(CC)C=O	InChI=1S/C8H14O/c1-3-5-6-8(4-2)7-9/h6-7H,3-5H2,1-2H3	2.732	24.217	74	0.625	32	17.07	0.135	0
2-ethyl-3-methylbutanoate	117442-70-3			21653378				[C7H13O2]-	129.177	AFC001265	XJCPTWKSNPIJRN-UHFFFAOYSA-M	CCC(C(C)C)C(=O)[O-]	InChI=1S/C7H14O2/c1-4-6(5(2)3)7(8)9/h5-6H,4H2,1-3H3,(H,8,9)/p-1	1.386	22.592	50	0.857	36	40.13	0.311	0
2-ethylfuran	3208-16-0		HMDB0040587	18554	141565	FDB020370		C6H8O	96.1273	AFC000377	HLPIHRDZBHXTFJ-UHFFFAOYSA-N	CCC1=CC=CO1	InChI=1S/C6H8O/c1-2-6-4-3-5-7-6/h3-5H,2H2,1H3	0.777	16.696	44	0.333	30	9.23	0.096	0
2-ethylhexanol	104-76-7	C02498	HMDB0031231	7720	16011	FDB003255	LMFA05000703	C8H18O	130.228	AFC000286	YIWUKEYIRIRTPP-UHFFFAOYSA-N	CCCCC(CC)CO	InChI=1S/C8H18O/c1-3-5-6-8(4-2)7-9/h8-9H,3-7H2,1-2H3	2.659	26.884	74	1	32	20.23	0.155	0
2-heptanone	110-43-0	C08380	HMDB0003671	8051	5672	FDB008055	LMFA12000004	C7H14O	114.186	AFC000296	CATSNJVOTSVZJV-UHFFFAOYSA-N	CCCCCC(=O)C	InChI=1S/C7H14O/c1-3-4-5-6-7(2)8/h3-6H2,1-2H3	1.792	22.457	65	0.857	28	17.07	0.15	0
2-heptenal	2463-63-0		HMDB0033827	5283316	143912	FDB008060	LMFA06000019	C7H12O	112.17	AFC000970	NDFKTBCGKNOHPJ-UHFFFAOYSA-N	CCCCC=CC=O	InChI=1S/C7H12O/c1-2-3-4-5-6-7-8/h5-7H,2-4H2,1H3	2.286	21.124	74	0.571	26	17.07	0.152	0
2-hexen-1-ol	2305-21-7		HMDB0030952	5318042	144070	FDB008090	LMFA05000060	C6H12O	100.159	AFC001000	ZCHHRLHTBGRGOT-UHFFFAOYSA-N	CCCC=CCO	InChI=1S/C6H12O/c1-2-3-4-5-6-7/h4-5,7H,2-3,6H2,1H3	1.574	19.364	54	0.667	22	20.23	0.202	0
2-hexen-4-one	2497-21-4		HMDB0035239	5365811	89801	FDB013898		C6H10O	98.1432	AFC001028	FEWIGMWODIRUJM-UHFFFAOYSA-N	CC=CC(=O)CC	InChI=1S/C6H10O/c1-3-5-6(7)4-2/h3,5H,4H2,1-2H3	1.523	18.03	45	0.5	24	17.07	0.174	0
2-hexenal	6728-26-3	C08497	HMDB0031496	5281168	28913	FDB008081		C6H10O	98.1432	AFC000928	MBDOYVRWFFCFHM-UHFFFAOYSA-N	CCCC=CC=O	InChI=1S/C6H10O/c1-2-3-4-5-6-7/h4-6H,2-3H2,1H3	1.83	18.03	54	0.5	22	17.07	0.174	0
2-hexyl-oxy-5-pentyl-tetrahydrofuran								C15H30O2	242.398	AFC001619	BRWRCKKPZAHVJJ-UHFFFAOYSA-N	CCCCCCOC1CCC(CCCCC)O1	InChI=1S/C15H30O2/c1-3-5-7-9-13-16-15-12-11-14(17-15)10-8-6-4-2/h14-15H,3-13H2,1-2H3	4.832	48.008	344	1	72	18.46	0.076	1
2-hydroxy-5-(methylthio)-3-oxopent-1-enyl phosphate		C15651		5462148	50605	FDB030334		C6H11O6PS	242.188	AFC001065	YIEMFVNCENFBSD-UHFFFAOYSA-N	CSCCC(=O)C(=COP(=O)(O)O)O	InChI=1S/C6H11O6PS/c1-14-3-2-5(7)6(8)4-12-13(9,10)11/h4,8H,2-3H2,1H3,(H2,9,10,11)	-1.411	29.237	178	0.5	60	139.17	0.575	0
2-hydroxy-5-pentyl-tetrahydrofuran								C9H18O2	158.238	AFC001620	FAPYUVKMJWJMEH-UHFFFAOYSA-N	CCCCCC1CCC(O)O1	InChI=1S/C9H18O2/c1-2-3-4-5-8-6-7-9(10)11-8/h8-10H,2-7H2,1H3	2.183	29.446	134	1	48	29.46	0.186	0
2-hydroxyformononetin	1890-99-9	C02920	HMDB0031720	5280551	17678	FDB008383	LMPK12050081	C16H12O5	284.264	AFC000896	XKHHKXCBFHUOHM-UHFFFAOYSA-N	COC1=CC(=C(C=C1)C2=COC3=CC(=CC=C3C2=O)O)O	InChI=1S/C16H12O5/c1-20-10-3-5-11(14(18)7-10)13-8-21-15-6-9(17)2-4-12(15)16(13)19/h2-8,17-18H,1H3	-0.323	40.172	401	0.063	112	75.99	0.268	0
2-hydroxyisocaproic acid	498-36-2		HMDB0000665	92779	59783	FDB022171	LMFA01050381	C6H12O3	132.158	AFC000466	LVRFTAZAXQPQHI-UHFFFAOYSA-N	CC(C)CC(C(=O)O)O	InChI=1S/C6H12O3/c1-4(2)3-5(7)6(8)9/h4-5,7H,3H2,1-2H3,(H,8,9)	0.921	20.968	63	0.833	36	57.53	0.436	0
2-hydroxyphytanoyl-CoA		C07343	HMDB0001295	441263	15475	FDB022539	LMFA07050185	C41H74N7O18P3S	1078.05	AFC001183	WNVFJMYPVBOLKV-UHFFFAOYSA-N	CC(C)CCCC(C)CCCC(C)CCCC(C)C(C(=O)SCCNC(=O)CCNC(=O)C(C(C)(C)COP(=O)(O)OP(=O)(O)OCC1C(C(C(N2C=NC3=C2N=CN=C3N)O1)O)OP(=O)(O)O)O)O	InChI=1S/C41H74N7O18P3S/c1-25(2)11-8-12-26(3)13-9-14-27(4)15-10-16-28(5)32(50)40(54)70-20-19-43-30(49)17-18-44-38(53)35(52)41(6,7)22-63-69(60,61)66-68(58,59)62-21-29-34(65-67(55,56)57)33(51)39(64-29)48-24-47-31-36(42)45-23-46-37(31)48/h23-29,32-35,39,50-52H,8-22H2,1-7H3,(H,43,49)(H,44,53)(H,58,59)(H,60,61)(H2,42,45,46)(H2,55,56,57)	1.576	157.429	4601	0.805	350	435.31	0.404	4
2'-hydroxypseudobaptigenin		C03662		5280616		FDB030294		C15H10O7	302.236	AFC000902	LDAGXWNIKJJGNC-UHFFFAOYSA-N	C1=C(C=C2C(=C1)C(=O)C=C(C3=C(C(=C(C(=C3)O)O)O)O)O2)O	InChI=1S/C15H10O7/c16-6-1-2-7-9(17)5-12(22-11(7)3-6)8-4-10(18)14(20)15(21)13(8)19/h1-5,16,18-21H	-1.244	38.682	368	0	120	127.45	0.422	0
2-isobutylthiazole	18640-74-9		HMDB0031862	62725	133683	FDB008546		C7H11NS	141.235	AFC000423	CMPVUVUNJQERIT-UHFFFAOYSA-N	CC(C)CC1=NC=CS1	InChI=1S/C7H11NS/c1-6(2)5-7-8-3-4-9-7/h3-4,6H,5H2,1-2H3	1.436	23.655	73	0.571	40	37.66	0.267	0
2-isopropylmaleate	7596-39-6	C02631	HMDB0012241	5280533	17275	FDB028883		C7H10O4	158.152	AFC000889	NJMGRJLQRLFQQX-UHFFFAOYSA-N	CC(C)C(=CC(=O)O)C(=O)O	InChI=1S/C7H10O4/c1-4(2)5(7(10)11)3-6(8)9/h3-4H,1-2H3,(H,8,9)(H,10,11)	1.143	22.196	81	0.429	46	74.6	0.472	0
2-keto-3-methyl-valerate		C00671	HMDB0000491	6857401	35146	FDB030164	LMFA01020275	[C6H9O3]-	129.134	AFC001112	JVQYSWDUAOAHFM-UHFFFAOYSA-M	CCC(C)C(=O)C(=O)[O-]	InChI=1S/C6H10O3/c1-3-4(2)5(7)6(8)9/h4H,3H2,1-2H3,(H,8,9)/p-1	0.414	18.967	61	0.667	36	57.2	0.443	0
2-maleylacetate	24740-88-3	C02222	HMDB0060348	5280500	1184			C6H6O5	158.109	AFC000886	SOXXPQLIZIPMIZ-UHFFFAOYSA-N	C(=CC(=O)O)C(=O)CC(=O)O	InChI=1S/C6H6O5/c7-4(3-6(10)11)1-2-5(8)9/h1-2H,3H2,(H,8,9)(H,10,11)	-0.241	18.571	109	0.167	44	91.67	0.58	0
2-methoxy-6-(all-trans-nonaprenyl)phenol				5372355	84522			C52H80O2	737.192	AFC001036	XRYXRAOXVPWHHK-UHFFFAOYSA-N	CC(=CCCC(=CCCC(=CCCC(=CCCC(=CCCC(=CCCC(=CCCC(=CCCC(=CCC1=CC=CC(=C1O)OC)C)C)C)C)C)C)C)C)C	InChI=1S/C52H80O2/c1-41(2)21-12-22-42(3)23-13-24-43(4)25-14-26-44(5)27-15-28-45(6)29-16-30-46(7)31-17-32-47(8)33-18-34-48(9)35-19-36-49(10)39-40-50-37-20-38-51(54-11)52(50)53/h20-21,23,25,27,29,31,33,35,37-39,53H,12-19,22,24,26,28,30,32,34,36,40H2,1-11H3	16.771	146.467	3312	0.538	240	29.46	0.04	3
2-methoxy-6-all trans-nonaprenyl-2-methoxy-1,4-benzoquinol								C52H80O3	753.192	AFC001430	SKAOREKNLOKWTC-UHFFFAOYSA-N	CC(=CCC/C(=C/CC/C(=C/CC/C(=C/CC/C(=C/CC/C(=C/CC/C(=C/CC/C(=C/CC/C(=C/CC1=C(C(=CC(=C1)O)OC)O)/C)/C)/C)/C)/C)/C)/C)/C)C	InChI=1S/C52H80O3/c1-40(2)20-12-21-41(3)22-13-23-42(4)24-14-25-43(5)26-15-27-44(6)28-16-29-45(7)30-17-31-46(8)32-18-33-47(9)34-19-35-48(10)36-37-49-38-50(53)39-51(55-11)52(49)54/h20,22,24,26,28,30,32,34,36,38-39,53-54H,12-19,21,23,25,27,29,31,33,35,37H2,1-11H3	16.208	147.269	3389	0.538	246	49.69	0.066	3
2-methoxy-6-all trans-octaprenyl-2-methoxy-1,4-benzoquinol								C47H72O3	685.075	AFC001621	CZFRMASEEPTBAQ-UHFFFAOYSA-N	CC(=CCC/C(=C/CC/C(=C/CC/C(=C/CC/C(=C/CC/C(=C/CC/C(=C/CC/C(=C/CC1=C(C(=CC(=C1)O)OC)O)/C)/C)/C)/C)/C)/C)/C)C	InChI=1S/C47H72O3/c1-36(2)18-11-19-37(3)20-12-21-38(4)22-13-23-39(5)24-14-25-40(6)26-15-27-41(7)28-16-29-42(8)30-17-31-43(9)32-33-44-34-45(48)35-46(50-10)47(44)49/h18,20,22,24,26,28,30,32,34-35,48-49H,11-17,19,21,23,25,27,29,31,33H2,1-10H3	14.382	133.135	2778	0.532	224	49.69	0.073	3
2-methoxycinnamic acid	1011-54-7			734154	136676	FDB004884		C10H10O3	178.185	AFC001863	FEGVSPGUHMGGBO-UHFFFAOYSA-N	COC1=C(C=CC=C1)/C=C/C(=O)O	InChI=1S/C10H10O3/c1-13-9-5-3-2-4-8(9)6-7-10(11)12/h2-7H,1H3,(H,11,12)	0.937	26.674	144	0.1	58	46.53	0.261	0
2-methyl-1-butanol	137-32-6		HMDB0031527	8723	48945	FDB008130	LMFA05000104	C5H12O	88.1484	AFC000313	QPRQEDXDYOZYLA-UHFFFAOYSA-N	CCC(C)CO	InChI=1S/C5H12O/c1-3-5(2)4-6/h5-6H,3-4H2,1-2H3	1.29	17.604	29	1	20	20.23	0.23	0
2-methyl-6-phytylquinol		C15882	HMDB0038959	71768135	75920	FDB018442		C27H46O2	402.654	AFC001470	GTWCNYRFOZKWTL-UHFFFAOYSA-N	CC(C)CCCC(C)CCCC(C)CCCC(=CCC1=CC(=CC(=C1O)C)O)C	InChI=1S/C27H46O2/c1-20(2)10-7-11-21(3)12-8-13-22(4)14-9-15-23(5)16-17-25-19-26(28)18-24(6)27(25)29/h16,18-22,28-29H,7-15,17H2,1-6H3	8.77	79.796	870	0.704	132	40.46	0.101	2
2-methylbutanal	1730-97-8	C02223	HMDB0031525	6971249	88414	FDB008127		C5H10O	86.1325	AFC000272	BYGQBDHUGHBGMD-UHFFFAOYSA-N	CCC(C)C=O	InChI=1S/C5H10O/c1-3-5(2)4-6/h4-5H,3H2,1-2H3	1.403	16.27	29	0.8	20	17.07	0.198	0
2-methylbutyl-2-methylbutanoate	2445-78-5		HMDB0039218	17129		FDB018750	LMFA07010723	C10H20O2	172.265	AFC000372	PVYFCGRBIREQLL-UHFFFAOYSA-N	CCC(C)COC(=O)C(C)CC	InChI=1S/C10H20O2/c1-5-8(3)7-12-10(11)9(4)6-2/h8-9H,5-7H2,1-4H3	3.255	32.54	133	0.9	48	26.3	0.153	0
2-methylbutyraldehyde	96-17-3	C02223	HMDB0031526	7284	16182	FDB008127		C5H10O	86.1325	AFC000272	BYGQBDHUGHBGMD-UHFFFAOYSA-N	CCC(C)C=O	InChI=1S/C5H10O/c1-3-5(2)4-6/h4-5H,3H2,1-2H3	1.403	16.27	29	0.8	20	17.07	0.198	0
2-methylglutaric acid	617-62-9		HMDB0000422	12046	68567	FDB022036	LMFA01170084	C6H10O4	146.141	AFC000349	AQYCMVICBNBXNA-UHFFFAOYSA-N	CC(CCC(=O)O)C(=O)O	InChI=1S/C6H10O4/c1-4(6(9)10)2-3-5(7)8/h4H,2-3H2,1H3,(H,7,8)(H,9,10)	0.509	20.436	85	0.667	40	74.6	0.511	0
2-methylsuccinic acid	498-21-5		HMDB0001844	10349	89843	FDB022704	LMFA01170119	C5H8O4	132.115	AFC000328	WXUAQHNMJWJLTG-UHFFFAOYSA-N	CC(CC(=O)O)C(=O)O	InChI=1S/C5H8O4/c1-3(5(8)9)2-4(6)7/h3H,2H2,1H3,(H,6,7)(H,8,9)	0.052	17.342	63	0.6	36	74.6	0.565	0
2-nonanone	821-55-6		HMDB0031266	13187	77927	FDB003308	LMFA12000052	C9H18O	142.239	AFC000362	VKCYHJWLYTUGCC-UHFFFAOYSA-N	CCCCCCCC(=O)C	InChI=1S/C9H18O/c1-3-4-5-6-7-8-9(2)10/h3-8H2,1-2H3	2.704	28.644	111	0.889	36	17.07	0.12	0
2-nonenal	2463-53-8		HMDB0031269	5283335	142592	FDB003312	LMFA06000041	C9H16O	140.223	AFC000973	BSAIUMLZVGUGKX-UHFFFAOYSA-N	CCCCCCC=CC=O	InChI=1S/C9H16O/c1-2-3-4-5-6-7-8-9-10/h7-9H,2-6H2,1H3	3.198	27.311	122	0.667	34	17.07	0.122	0
2-nonyl-oxy-5-pentyl-tetrahydrofuran								C18H36O2	284.478	AFC001623	GGWCSXQLDGOTLY-UHFFFAOYSA-N	CCCCCCCCCOC1CCC(CCCCC)O1	InChI=1S/C18H36O2/c1-3-5-7-8-9-10-12-16-19-18-15-14-17(20-18)13-11-6-4-2/h17-18H,3-16H2,1-2H3	6.201	57.289	502	1	84	18.46	0.065	2
2-O-(6-phospho-alpha-D-mannosyl)-D-glycerate		C16699	HMDB0012152	46906104	60331	FDB028809		[C9H14O12P]3-	345.174	AFC001412	BOLXAGHGKNGVBE-UHFFFAOYSA-K	C(C(C(=O)[O-])OC1C(C(C(C(COP(=O)([O-])[O-])O1)O)O)O)O	InChI=1S/C9H17O12P/c10-1-3(8(14)15)20-9-7(13)6(12)5(11)4(21-9)2-19-22(16,17)18/h3-7,9-13H,1-2H2,(H,14,15)(H2,16,17,18)/p-3	-5.102	38.429	338	0.889	108	221.74	0.643	1
2-octanone	111-13-7		HMDB0031294	8093	87434	FDB003344	LMFA12000054	C8H16O	128.212	AFC000299	ZPVFWPFBNIEHGJ-UHFFFAOYSA-N	CCCCCCC(=O)C	InChI=1S/C8H16O/c1-3-4-5-6-7-8(2)9/h3-7H2,1-2H3	2.248	25.551	87	0.875	32	17.07	0.133	0
2-octenal	2363-89-5	C21138	HMDB0013809	5283324	61748	FDB002956	LMFA06000029	C8H14O	126.196	AFC000972	LVBXEMGDVWVTGY-UHFFFAOYSA-N	CCCCCC=CC=O	InChI=1S/C8H14O/c1-2-3-4-5-6-7-8-9/h6-8H,2-5H2,1H3	2.742	24.217	96	0.625	30	17.07	0.135	0
2-octyl-oxy-5-pentyl-tetrahydrofuran								C17H34O2	270.451	AFC001624	DLYFTVRDWAAWLQ-UHFFFAOYSA-N	CCCCCCCCOC1CCC(CCCCC)O1	InChI=1S/C17H34O2/c1-3-5-7-8-9-11-15-18-17-14-13-16(19-17)12-10-6-4-2/h16-17H,3-15H2,1-2H3	5.745	54.195	446	1	80	18.46	0.068	2
2''-O-pentosyl-6-C-hexosyl luteolin								C27H30O17	626.518	AFC001627	WXTABWSFONZUTM-UHFFFAOYSA-N	C1=CC(=C(C=C1C2=CC(=O)C3=C(C(=C(C=C3O2)O)OC4C(C(C(C(CO)O4)OC5(CO)C(C(C(CO)O5)O)O)O)O)O)O)O	InChI=1S/C27H30O17/c28-6-16-19(35)25(39)27(8-30,43-16)44-24-17(7-29)41-26(22(38)21(24)37)42-23-13(34)5-15-18(20(23)36)12(33)4-14(40-15)9-1-2-10(31)11(32)3-9/h1-5,16-17,19,21-22,24-26,28-32,34-39H,6-8H2	-5.132	81.158	1508	0.444	242	285.75	0.456	3
2''-O-pentosyl-8-C-hexosyl luteolin								C27H30O15	594.519	AFC001628	WOSZYWZTLJTPJE-UHFFFAOYSA-N	C1=CC(=C(C=C1C2=CC(=O)C3=CC=C(C(=C3O2)C4C(C(C(C(CO)O4)OC5(CO)C(C(C(CO)O5)O)O)O)O)O)O)O	InChI=1S/C27H30O15/c28-7-17-20(35)26(38)27(9-30,41-17)42-24-18(8-29)40-25(22(37)21(24)36)19-13(32)4-2-11-14(33)6-16(39-23(11)19)10-1-3-12(31)15(34)5-10/h1-6,17-18,20-22,24-26,28-32,34-38H,7-9H2	-4.346	79.554	1229	0.444	232	256.29	0.431	3
2-oxo-3-phenylpropanoate	156-06-9	C00166	HMDB0000205	4592697	18005	FDB030352		[C9H7O3]-	163.15	AFC000865	BTNMPGBKDVTSJY-UHFFFAOYSA-M	C1=CC=C(C=C1)CC(=O)C(=O)[O-]	InChI=1S/C9H8O3/c10-8(9(11)12)6-7-4-2-1-3-5-7/h1-5H,6H2,(H,11,12)/p-1	0.061	22.914	131	0.111	54	57.2	0.351	0
2-oxo-4-methylthiobutanoate	583-92-6	C01180	HMDB0001553	473	33574	FDB030353		C5H8O3S	148.182	AFC000070	SXFSQZDSUWACKX-UHFFFAOYSA-N	CSCCC(=O)C(=O)O	InChI=1S/C5H8O3S/c1-9-3-2-4(6)5(7)8/h2-3H2,1H3,(H,7,8)	0.236	19.44	74	0.6	34	79.67	0.538	0
2-oxobutanoate	600-18-0	C00109	HMDB0000005	3593277	16763	FDB030356		[C4H5O3]-	101.081	AFC000859	TYEYBOSBBBHJIV-UHFFFAOYSA-M	CCC(=O)C(=O)[O-]	InChI=1S/C4H6O3/c1-2-3(5)4(6)7/h2H2,1H3,(H,6,7)/p-1	-0.505	12.78	36	0.5	26	57.2	0.566	0
2-oxoglutaric acid	328-50-7	C00026	HMDB0000208	51	30915	FDB003361		C5H6O5	146.098	AFC000007	KPGXRSRHYNQIFN-UHFFFAOYSA-N	C(CC(=O)O)C(=O)C(=O)O	InChI=1S/C5H6O5/c6-3(5(9)10)1-2-4(7)8/h1-2H2,(H,7,8)(H,9,10)	-0.674	16.811	85	0.4	40	91.67	0.628	0
2-oxoisovalerate	759-05-7	C00141	HMDB0000019	49	16530	FDB012250		C5H8O3	116.115	AFC000006	QHKABHOOEWYVLI-UHFFFAOYSA-N	CC(C)C(=O)C(=O)O	InChI=1S/C5H8O3/c1-3(2)4(6)5(7)8/h3H,1-2H3,(H,7,8)	0.636	16.54	43	0.6	32	54.37	0.469	0
2-penten-1-ol	1576-96-1			5364920	89943	FDB008237		C5H10O	86.1325	AFC001024	BTSIZIIPFNVMHF-UHFFFAOYSA-N	CCC=CCO	InChI=1S/C5H10O/c1-2-3-4-5-6/h3-4,6H,2,5H2,1H3	1.117	16.27	38	0.6	18	20.23	0.235	0
2-pentenal	764-39-6		HMDB0031601	5364752	61722	FDB008234		C5H8O	84.1166	AFC001023	DTCCTIQRPGSLPT-UHFFFAOYSA-N	CCC=CC=O	InChI=1S/C5H8O/c1-2-3-4-5-6/h3-5H,2H2,1H3	1.374	14.936	38	0.4	18	17.07	0.203	0
2-pentylfuran	3777-69-3		HMDB0013824	19602	89197	FDB006023		C9H14O	138.207	AFC000381	YVBAUDVGOFCUSG-UHFFFAOYSA-N	CCCCCC1=CC=CO1	InChI=1S/C9H14O/c1-2-3-4-6-9-7-5-8-10-9/h5,7-8H,2-4,6H2,1H3	2.146	25.977	112	0.556	42	9.23	0.067	0
2-pentyl-oxy-5-pentyl-tetrahydrofuran								C14H28O2	228.371	AFC001625	CWNQUIYIENOMJD-UHFFFAOYSA-N	CCCCCC1CCC(OCCCCC)O1	InChI=1S/C14H28O2/c1-3-5-7-9-13-10-11-14(16-13)15-12-8-6-4-2/h13-14H,3-12H2,1-2H3	4.376	44.914	299	1	68	18.46	0.081	0
2-phenethyl-oxy-5-pentyl-tetrahydrofuran								C17H26O2	262.388	AFC001626	ZFBNRWXPZDTTBF-UHFFFAOYSA-N	CCCCCC1CCC(OCCC2=CC=CC=C2)O1	InChI=1S/C17H26O2/c1-2-3-5-10-16-11-12-17(19-16)18-14-13-15-8-6-4-7-9-15/h4,6-9,16-17H,2-3,5,10-14H2,1H3	4.03	48.861	419	0.647	88	18.46	0.07	0
2-phenylethanol	60-12-8	C05853	HMDB0033944	6054	49000	FDB012152		C8H10O	122.165	AFC000235	WRMNZCZEMHIOCP-UHFFFAOYSA-N	C1=CC=C(C=C1)CCO	InChI=1S/C8H10O/c9-7-6-8-4-2-1-3-5-8/h1-5,9H,6-7H2	1.08	21.55	81	0.25	38	20.23	0.166	0
2-phospho-4-(cytidine 5'-diphospho)-2-C-methyl-D-erythritol	263016-95-1	C11436		443200	16840	FDB030358		C14H26N3O17P3	601.288	AFC000744	HTJXTKBIUVFUAR-UHFFFAOYSA-N	CC(CO)(C(COP(=O)(O)OP(=O)(O)OCC1C(C(C(N2C=CC(=NC2=O)N)O1)O)O)O)OP(=O)(O)O	InChI=1S/C14H26N3O17P3/c1-14(6-18,33-35(23,24)25)8(19)5-31-37(28,29)34-36(26,27)30-4-7-10(20)11(21)12(32-7)17-3-2-9(15)16-13(17)22/h2-3,7-8,10-12,18-21H,4-6H2,1H3,(H,26,27)(H,28,29)(H2,15,16,22)(H2,23,24,25)	-5.774	69.801	1108	0.714	194	347.32	0.578	4
2-phospho-D-glycerate	3443-57-0	C00631	HMDB0003391	439278	17835	FDB001407		C3H7O7P	186.057	AFC000658	GXIURPTVHJPJLF-UHFFFAOYSA-N	C(C(C(=O)O)OP(=O)(O)O)O	InChI=1S/C3H7O7P/c4-1-2(3(5)6)10-11(7,8)9/h2,4H,1H2,(H,5,6)(H2,7,8,9)	-2.01	19.192	81	0.667	48	134.1	0.721	0
2-phosphoglycolate	13147-57-4	C00988	HMDB0000816	529	17150	FDB030360		C2H5O6P	156.031	AFC000076	ASCFNMCAHFUBCO-UHFFFAOYSA-N	C(C(=O)O)OP(=O)(O)O	InChI=1S/C2H5O6P/c3-2(4)1-8-9(5,6)7/h1H2,(H,3,4)(H2,5,6,7)	-1.499	15.296	65	0.5	38	113.87	0.73	0
2-succinyl-5-enolpyruvyl-6-hydroxy-3-cyclohexene-1-carboxylate		C16519		24883454	50271	FDB030361		C14H16O9	328.272	AFC001295	XYCATPIYKOARSZ-UHFFFAOYSA-N	C=C(C(=O)O)OC1C=CC(C(=O)CCC(=O)O)C(C1O)C(=O)O	InChI=1S/C14H16O9/c1-6(13(19)20)23-9-4-2-7(8(15)3-5-10(16)17)11(12(9)18)14(21)22/h2,4,7,9,11-12,18H,1,3,5H2,(H,16,17)(H,19,20)(H,21,22)	-1.19	42.527	399	0.429	110	158.43	0.483	0
2-succinylbenzoate	27415-09-4	C02730		955	44788	FDB030362		C11H10O5	222.195	AFC000141	YIVWQNVQRXFZJB-UHFFFAOYSA-N	C1=CC(=C(C=C1)C(=O)O)C(=O)CCC(=O)O	InChI=1S/C11H10O5/c12-9(5-6-10(13)14)7-3-1-2-4-8(7)11(15)16/h1-4H,5-6H2,(H,13,14)(H,15,16)	0.338	30.038	202	0.182	74	91.67	0.413	0
2-trans,5-cis-tetradecadienoyl-CoA				25244134	87701			[C35H54N7O17P3S]4-	969.829	AFC001329	JVEFYXPCQBMMAA-UHFFFAOYSA-J	CCCCCCCCC=CCC=CC(=O)SCCNC(=O)CCNC(=O)C(C(C)(C)COP(=O)([O-])OP(=O)([O-])OCC1C(C(C(N2C=NC3=C2N=CN=C3N)O1)O)OP(=O)([O-])[O-])O	InChI=1S/C35H58N7O17P3S/c1-4-5-6-7-8-9-10-11-12-13-14-15-26(44)63-19-18-37-25(43)16-17-38-33(47)30(46)35(2,3)21-56-62(53,54)59-61(51,52)55-20-24-29(58-60(48,49)50)28(45)34(57-24)42-23-41-27-31(36)39-22-40-32(27)42/h11-12,14-15,22-24,28-30,34,45-46H,4-10,13,16-21H2,1-3H3,(H,37,43)(H,38,47)(H,51,52)(H,53,54)(H2,36,39,40)(H2,48,49,50)/p-4	-1.533	132.731	3934	0.657	312	426.4	0.44	3
2-trans,-6-trans-farnesyl monophosphate		C20121		46926298	88226	FDB030363		[C15H25O4P]2-	300.331	AFC001417	ALEWCKXBHSDCCT-UHFFFAOYSA-L	CC(=CCCC(=CCCC(=CCOP(=O)([O-])[O-])C)C)C	InChI=1S/C15H27O4P/c1-13(2)7-5-8-14(3)9-6-10-15(4)11-12-19-20(16,17)18/h7,9,11H,5-6,8,10,12H2,1-4H3,(H2,16,17,18)/p-2	3.283	49.908	413	0.6	86	82.23	0.274	0
2-trans-dodecenoyl-CoA		C03221	HMDB0003712	11966110	15471	FDB023218	LMFA07050176	C33H56N7O17P3S	947.823	AFC001178	IRFYVBULXZMEDE-UHFFFAOYSA-N	CCCCCCCCCC=CC(=O)SCCNC(=O)CCNC(=O)C(C(C)(C)COP(=O)(O)OP(=O)(O)OCC1C(C(C(N2C=NC3=C2N=CN=C3N)O1)O)OP(=O)(O)O)O	InChI=1S/C33H56N7O17P3S/c1-4-5-6-7-8-9-10-11-12-13-24(42)61-17-16-35-23(41)14-15-36-31(45)28(44)33(2,3)19-54-60(51,52)57-59(49,50)53-18-22-27(56-58(46,47)48)26(43)32(55-22)40-21-39-25-29(34)37-20-38-30(25)40/h12-13,20-22,26-28,32,43-44H,4-11,14-19H2,1-3H3,(H,35,41)(H,36,45)(H,49,50)(H,51,52)(H2,34,37,38)(H2,46,47,48)	-0.666	130.544	3610	0.697	304	415.08	0.438	4
2-trans-hexadecenal	3163-37-9	C06123	HMDB0060482	5280541	17585		LMFA06000089	C16H30O	238.409	AFC000893	KLJFYXOVGVXZKT-UHFFFAOYSA-N	CCCCCCCCCCCCCC=CC=O	InChI=1S/C16H30O/c1-2-3-4-5-6-7-8-9-10-11-12-13-14-15-16-17/h14-16H,2-13H2,1H3	6.392	48.966	384	0.813	62	17.07	0.072	2
3-(imidazol-4-yl)-2-oxopropyl dihydrogen phosphate	99979-59-6	C01267	HMDB0012236	792	16426	FDB028879		C6H9N2O5P	220.12	AFC000111	YCFFMSOLUMRAMD-UHFFFAOYSA-N	C(C1=CN=CN1)C(=O)COP(=O)(O)O	InChI=1S/C6H9N2O5P/c9-6(3-13-14(10,11)12)1-5-2-7-4-8-5/h2,4H,1,3H2,(H,7,8)(H2,10,11,12)	-2.637	26.401	179	0.333	66	118.03	0.536	0
3,22-dioxochol-4-en-24-oyl-CoA				90658757	86293	FDB030376		C45H68N7O19P3S	1136.05	AFC001494	MUOUYOUSQGFFIP-UHFFFAOYSA-N	CC(C1CCC2C3CCC4=CC(=O)CCC4(C)C3CCC12C)C(=O)CC(=O)SCCNC(=O)CCNC(=O)C(C(C)(C)COP(=O)(O)OP(=O)(O)OCC5C(C(C(N6C=NC7=C6N=CN=C7N)O5)O)OP(=O)(O)O)O	InChI=1S/C45H68N7O19P3S/c1-24(28-8-9-29-27-7-6-25-18-26(53)10-13-44(25,4)30(27)11-14-45(28,29)5)31(54)19-34(56)75-17-16-47-33(55)12-15-48-41(59)38(58)43(2,3)21-68-74(65,66)71-73(63,64)67-20-32-37(70-72(60,61)62)36(57)42(69-32)52-23-51-35-39(46)49-22-50-40(35)52/h18,22-24,27-30,32,36-38,42,57-58H,6-17,19-21H2,1-5H3,(H,47,55)(H,48,59)(H,63,64)(H,65,66)(H2,46,49,50)(H2,60,61,62)	-1.112	161.27	4993	0.733	412	449.22	0.396	4
3,24-dioxocholest-4-en-26-oyl-CoA				102515485		FDB030377		[C48H70N7O19P3S]4-	1174.09	AFC001525	ZVFUUGBGZMBUAN-UHFFFAOYSA-J	CC(CCC(=O)C(C)C(=O)SCCNC(=O)CCNC(=O)C(C(C)(C)COP(=O)([O-])OP(=O)([O-])OCC1C(C(C(N2C=NC3=C2N=CN=C3N)O1)O)OP(=O)([O-])[O-])O)C4CCC5C6CCC7=CC(=O)CCC7(C)C6CCC45C	InChI=1S/C48H74N7O19P3S/c1-26(31-10-11-32-30-9-8-28-21-29(56)13-16-47(28,5)33(30)14-17-48(31,32)6)7-12-34(57)27(2)45(62)78-20-19-50-36(58)15-18-51-43(61)40(60)46(3,4)23-71-77(68,69)74-76(66,67)70-22-35-39(73-75(63,64)65)38(59)44(72-35)55-25-54-37-41(49)52-24-53-42(37)55/h21,24-27,30-33,35,38-40,44,59-60H,7-20,22-23H2,1-6H3,(H,50,58)(H,51,61)(H,66,67)(H,68,69)(H2,49,52,53)(H2,63,64,65)/p-4	-1.283	167.884	5444	0.75	426	460.54	0.392	3
3',4',5,6-tetrahydroxy-3,7-dimethoxyflavone	59171-23-2	C04581		148856	27767		LMPK12112991	C17H14O8	346.289	AFC000557	WGWGXVOAFMLMJZ-UHFFFAOYSA-N	COC1=CC2=C(C(=C1O)O)C(=O)C(=C(C3=CC(=C(C=C3)O)O)O2)OC	InChI=1S/C17H14O8/c1-23-11-6-10-12(14(21)13(11)20)15(22)17(24-2)16(25-10)7-3-4-8(18)9(19)5-7/h3-6,18-21H,1-2H3	-1.678	45.671	451	0.118	134	125.68	0.363	0
3,4-dihydroxy-5-all-trans-hexaprenylbenzoate		C05200	HMDB0001063	54692919	58373	FDB022402		[C37H53O4]-	561.816	AFC001451	VEPICJBQCOUQPI-UHFFFAOYSA-M	CC(=CCCC(=CCCC(=CCCC(=CCCC(=CCCC(=CCC1=C(C(=CC(=C1)C(=O)O)O)[O-])C)C)C)C)C)C	InChI=1S/C37H54O4/c1-27(2)13-8-14-28(3)15-9-16-29(4)17-10-18-30(5)19-11-20-31(6)21-12-22-32(7)23-24-33-25-34(37(40)41)26-35(38)36(33)39/h13,15,17,19,21,23,25-26,38-39H,8-12,14,16,18,20,22,24H2,1-7H3,(H,40,41)/p-1	10.114	103.668	1791	0.486	186	80.59	0.144	3
3,4-dihydroxy-5-all-trans-nonaprenylbenzoate				54738024	62789	FDB030381		[C52H77O4]-	766.167	AFC001453	FMSCZYMOUYOENK-UHFFFAOYSA-M	CC(=CCCC(=CCCC(=CCCC(=CCCC(=CCCC(=CCCC(=CCCC(=CCCC(=CCC1=C(C(=CC(=C1)C(=O)O)O)[O-])C)C)C)C)C)C)C)C)C	InChI=1S/C52H78O4/c1-39(2)19-11-20-40(3)21-12-22-41(4)23-13-24-42(5)25-14-26-43(6)27-15-28-44(7)29-16-30-45(8)31-17-32-46(9)33-18-34-47(10)35-36-48-37-49(52(55)56)38-50(53)51(48)54/h19,21,23,25,27,29,31,33,35,37-38,53-54H,11-18,20,22,24,26,28,30,32,34,36H2,1-10H3,(H,55,56)/p-1	15.594	146.071	3468	0.519	252	80.59	0.105	3
3,4-dihydroxy-5-all-trans-octaprenylbenzoate				54740337	84452	FDB030382		[C47H69O4]-	698.05	AFC001455	ZTGCMYPRIIAXFD-UHFFFAOYSA-M	CC(=CCCC(=CCCC(=CCCC(=CCCC(=CCCC(=CCCC(=CCCC(=CCC1=C(C(=CC(=C1)C(=O)O)O)[O-])C)C)C)C)C)C)C)C	InChI=1S/C47H70O4/c1-35(2)17-10-18-36(3)19-11-20-37(4)21-12-22-38(5)23-13-24-39(6)25-14-26-40(7)27-15-28-41(8)29-16-30-42(9)31-32-43-33-44(47(50)51)34-45(48)46(43)49/h17,19,21,23,25,27,29,31,33-34,48-49H,10-16,18,20,22,24,26,28,30,32H2,1-9H3,(H,50,51)/p-1	13.767	131.937	2849	0.511	230	80.59	0.116	3
3,4-dihydroxybenzaldehyde	139-85-5	C16700	HMDB0059965	8768	50205	FDB012060		C7H6O3	138.121	AFC001849	IBGBGRVKPALMCQ-UHFFFAOYSA-N	C1=C(C=C(C(=C1)O)O)C=O	InChI=1S/C7H6O3/c8-4-5-1-2-6(9)7(10)3-5/h1-4,9-10H	-0.111	18.727	88	0	46	57.53	0.417	0
3,4-dihydroxybenzoic acid	99-50-3	C00230	HMDB0001856	72	36063	FDB000847		C7H6O4	154.12	AFC001838	YQUVCSBJEUQKSH-UHFFFAOYSA-N	C1=C(C=C(C(=C1)O)O)C(=O)O	InChI=1S/C7H6O4/c8-5-2-1-4(7(10)11)3-6(5)9/h1-3,8-9H,(H,10,11)	-0.158	19.529	99	0	52	77.76	0.505	0
3,5-tetradecadienoate	23400-52-4			11172137	72000		LMFA01030789	C14H24O2	224.34	AFC001213	YRUMHTHCEZRHTN-UHFFFAOYSA-N	CCCCCCCCC=CC=CCC(=O)O	InChI=1S/C14H24O2/c1-2-3-4-5-6-7-8-9-10-11-12-13-14(15)16/h9-12H,2-8,13H2,1H3,(H,15,16)	4.566	42.247	321	0.643	60	37.3	0.166	1
3,5-tetradecadienoyl-CoA				25245148	72001		LMFA07050113	C35H58N7O17P3S	973.86	AFC001348	QADUDNMSWUFMGZ-UHFFFAOYSA-N	CCCCCCCCC=CC=CCC(=O)SCCNC(=O)CCNC(=O)C(C(C)(C)COP(=O)(O)OP(=O)(O)OCC1C(C(C(N2C=NC3=C2N=CN=C3N)O1)O)OP(=O)(O)O)O	InChI=1S/C35H58N7O17P3S/c1-4-5-6-7-8-9-10-11-12-13-14-15-26(44)63-19-18-37-25(43)16-17-38-33(47)30(46)35(2,3)21-56-62(53,54)59-61(51,52)55-20-24-29(58-60(48,49)50)28(45)34(57-24)42-23-41-27-31(36)39-22-40-32(27)42/h11-14,22-24,28-30,34,45-46H,4-10,15-21H2,1-3H3,(H,37,43)(H,38,47)(H,51,52)(H,53,54)(H2,36,39,40)(H2,48,49,50)	-0.62	135.398	3934	0.657	312	415.08	0.426	4
3,6,7,3'-tetra-methylquercetagetin	603-56-5	C10030		5281608	3689	FDB005989	LMPK12113009	C19H18O8	374.342	AFC000949	NBVTYGIYKCPHQN-UHFFFAOYSA-N	COC1=C(C=CC(=C1)C2=C(C(=O)C3=C(C=C(C(=C3O)OC)OC)O2)OC)O	InChI=1S/C19H18O8/c1-23-11-7-9(5-6-10(11)20)17-19(26-4)16(22)14-12(27-17)8-13(24-2)18(25-3)15(14)21/h5-8,20-21H,1-4H3	-1.549	51.858	517	0.211	142	103.68	0.277	0
3,7,11,15-tetramethyl-2-hexadecen-1-ol	7541-49-3	C01389	HMDB0002019	5366244	140431	FDB031117	LMPR0104010002	C20H40O	296.532	AFC000880	BOTWFXYSPFMFNR-UHFFFAOYSA-N	CC(C)CCCC(C)CCCC(C)CCCC(=CCO)C	InChI=1S/C20H40O/c1-17(2)9-6-10-18(3)11-7-12-19(4)13-8-14-20(5)15-16-21/h15,17-19,21H,6-14,16H2,1-5H3	7.337	62.674	484	0.9	86	20.23	0.068	2
3,7,3'-tri-methylquercetagetin	23370-16-3	C10031		189065	3690	FDB005990	LMPK12112982	C18H16O8	360.316	AFC000612	QQBSPLCHDUCBNM-UHFFFAOYSA-N	COC1=C(C=CC(=C1)C2=C(C(=O)C3=C(C=C(C(=C3O)O)OC)O2)OC)O	InChI=1S/C18H16O8/c1-23-10-6-8(4-5-9(10)19)17-18(25-3)16(22)13-11(26-17)7-12(24-2)14(20)15(13)21/h4-7,19-21H,1-3H3	-1.613	48.765	472	0.167	138	114.68	0.318	0
3,7,4'-tri-O-methylquercetin	572-32-7	C04444		5280682	17825		LMPK12112762	C18H16O7	344.316	AFC000906	KPCRYSMUMBNTCK-UHFFFAOYSA-N	COC1=CC2=C(C(=C1)O)C(=O)C(=C(C3=CC(=C(C=C3)OC)O)O2)OC	InChI=1S/C18H16O7/c1-22-10-7-12(20)15-14(8-10)25-17(18(24-3)16(15)21)9-4-5-13(23-2)11(19)6-9/h4-8,19-20H,1-3H3	-1.05	47.963	479	0.167	132	94.45	0.274	0
3,7-di-O-methylquercetin	2068-02-2	C01265	HMDB0029263	5280417	18010	FDB000176	LMPK12112731	C17H14O7	330.29	AFC000879	LUJAXSNNYBCFEE-UHFFFAOYSA-N	COC1=CC2=C(C(=C1)O)C(=O)C(=C(C3=CC(=C(C=C3)O)O)O2)OC	InChI=1S/C17H14O7/c1-22-9-6-12(20)14-13(7-9)24-16(17(23-2)15(14)21)8-3-4-10(18)11(19)5-8/h3-7,18-20H,1-2H3	-1.115	44.869	430	0.118	128	105.45	0.319	0
3-acetamidopropanal	73323-68-9	C18170	HMDB0012880	5460495	30322	FDB029195		C5H9NO2	115.131	AFC001060	ARJPPNFIEQKVBB-UHFFFAOYSA-N	CC(=O)NCCC=O	InChI=1S/C5H9NO2/c1-5(8)6-3-2-4-7/h4H,2-3H2,1H3,(H,6,8)	-0.875	17.505	65	0.6	28	46.17	0.401	0
3alpha,7alpha,12alpha-trihydroxy-24-oxo-5-beta-cholestanoyl CoA		C05467	HMDB0006891	45266665	58507	FDB024138	LMST01010216	[C48H74N7O21P3S]4-	1210.12	AFC001394	AWLXQJGPNLCTLM-UHFFFAOYSA-J	CC(CCC(=O)C(C)C(=O)SCCNC(=O)CCNC(=O)C(C(C)(C)COP(=O)([O-])OP(=O)([O-])OCC1C(C(C(N2C=NC3=C2N=CN=C3N)O1)O)OP(=O)([O-])[O-])O)C4CCC5C6C(CC(C45C)O)C7(C)CCC(CC7CC6O)O	InChI=1S/C48H78N7O21P3S/c1-24(28-8-9-29-36-30(19-34(59)48(28,29)6)47(5)13-11-27(56)17-26(47)18-32(36)58)7-10-31(57)25(2)45(64)80-16-15-50-35(60)12-14-51-43(63)40(62)46(3,4)21-73-79(70,71)76-78(68,69)72-20-33-39(75-77(65,66)67)38(61)44(74-33)55-23-54-37-41(49)52-22-53-42(37)55/h22-30,32-34,36,38-40,44,56,58-59,61-62H,7-21H2,1-6H3,(H,50,60)(H,51,63)(H,68,69)(H,70,71)(H2,49,52,53)(H2,65,66,67)/p-4	-3.4	172.155	5586	0.813	438	504.16	0.417	4
3alpha,7alpha-dihydroxy-24-oxo-5beta-cholestanoyl CoA		C05449	HMDB0006896	44263314	28533	FDB024143	LMST01010219	C48H78N7O20P3S	1198.16	AFC000867	QWTJBRPOHKIMDT-UHFFFAOYSA-N	CC(CCC(=O)C(C)C(=O)SCCNC(=O)CCNC(=O)C(C(C)(C)COP(=O)(O)OP(=O)(O)OCC1C(C(C(N2C=NC3=C2N=CN=C3N)O1)O)OP(=O)(O)O)O)C4CCC5C6C(CCC45C)C7(C)CCC(CC7CC6O)O	InChI=1S/C48H78N7O20P3S/c1-25(29-8-9-30-36-31(12-15-48(29,30)6)47(5)14-11-28(56)19-27(47)20-33(36)58)7-10-32(57)26(2)45(63)79-18-17-50-35(59)13-16-51-43(62)40(61)46(3,4)22-72-78(69,70)75-77(67,68)71-21-34-39(74-76(64,65)66)38(60)44(73-34)55-24-54-37-41(49)52-23-53-42(37)55/h23-31,33-34,36,38-40,44,56,58,60-61H,7-22H2,1-6H3,(H,50,59)(H,51,62)(H,67,68)(H,69,70)(H2,49,52,53)(H2,64,65,66)	-0.963	174.02	5517	0.813	432	472.61	0.395	4
3-Caffeoylshikimic acid								C16H16O8	336.294	AFC001759	MRDAXWGGWWDUKL-UHFFFAOYSA-N	C1=C(/C=C/C(=O)O[C@@H]2C=C(C[C@H]([C@@H]2O)O)C(=O)O)C=C(C(=C1)O)O	InChI=1S/C16H16O8/c17-10-3-1-8(5-11(10)18)2-4-14(20)24-13-7-9(16(22)23)6-12(19)15(13)21/h1-5,7,12-13,15,17-19,21H,6H2,(H,22,23)	-0.26	45.245	510	0.25	120	144.52	0.43	0
3-carene	13466-78-9	C09839;C11382	HMDB0035619	26049	35661	FDB014324	LMPR0102120015;LMPR0102120021	C10H16	136.234	AFC000399	BQOFWKZOCNGFEC-UHFFFAOYSA-N	CC1=CCC2C(C1)C2(C)C	InChI=1S/C10H16/c1-7-4-5-8-9(6-7)10(8,2)3/h4,8-9H,5-6H2,1-3H3	2.873	28.269	84	0.8	58	0	0	0
3-cis-dodecenoyl-CoA		C02944	HMDB0004257	11966217	27989	FDB023353	LMFA07050302	C33H56N7O17P3S	947.823	AFC001188	XEMIVMKTVGRFTD-UHFFFAOYSA-N	CCCCCCCCC=CCC(=O)SCCNC(=O)CCNC(=O)C(C(C)(C)COP(=O)(O)OP(=O)(O)OCC1C(C(C(N2C=NC3=C2N=CN=C3N)O1)O)OP(=O)(O)O)O	InChI=1S/C33H56N7O17P3S/c1-4-5-6-7-8-9-10-11-12-13-24(42)61-17-16-35-23(41)14-15-36-31(45)28(44)33(2,3)19-54-60(51,52)57-59(49,50)53-18-22-27(56-58(46,47)48)26(43)32(55-22)40-21-39-25-29(34)37-20-38-30(25)40/h11-12,20-22,26-28,32,43-44H,4-10,13-19H2,1-3H3,(H,35,41)(H,36,45)(H,49,50)(H,51,52)(H2,34,37,38)(H2,46,47,48)	-1.087	130.544	3610	0.697	304	415.08	0.438	4
3-cyano-L-alanine	6232-19-5	C02512	HMDB0060245	439742	16934	FDB030412		C4H6N2O2	114.103	AFC000699	BXRLWGXPSRYJDZ-UHFFFAOYSA-N	C(C#N)C(C(=O)O)N	InChI=1S/C4H6N2O2/c5-2-1-3(6)4(7)8/h3H,1,6H2,(H,7,8)	-0.971	14.845	54	0.5	30	87.11	0.764	0
3-cyanopyridine	100-54-9			79	86556			C6H4N2	104.11	AFC000012	GZPHSAQLYPIAIN-UHFFFAOYSA-N	C1=CN=CC(=C1)C#N	InChI=1S/C6H4N2/c7-4-6-2-1-3-8-5-6/h1-3,5H	0.22	15.427	60	0	34	36.15	0.347	0
3-dehydroquinate	10534-44-8	C00944	HMDB0012710	439351	17947	FDB029168		C7H10O6	190.151	AFC000666	WVMWZWGZRAXUBK-UHFFFAOYSA-N	C1C(C(C(=O)CC1(C(=O)O)O)O)O	InChI=1S/C7H10O6/c8-3-1-7(13,6(11)12)2-4(9)5(3)10/h3,5,8,10,13H,1-2H2,(H,11,12)	-2.173	23.8	119	0.714	66	115.06	0.605	0
3-dehydroshikimate	2922-42-1	C02637		439774	30918	FDB030416		C7H8O5	172.136	AFC000700	SLWWJZMPHJJOPH-UHFFFAOYSA-N	C1=C(CC(C(C1=O)O)O)C(=O)O	InChI=1S/C7H8O5/c8-4-1-3(7(11)12)2-5(9)6(4)10/h1,5-6,9-10H,2H2,(H,11,12)	-0.932	21.664	110	0.429	58	94.83	0.551	0
3-dehydrosphinganine	16105-69-4	C02934	HMDB0001480	439853	17862	FDB022645	LMSP01020002	C18H37NO2	299.493	AFC000701	KBUNOSOGGAARKZ-UHFFFAOYSA-N	CCCCCCCCCCCCCCCC(=O)C(CO)N	InChI=1S/C18H37NO2/c1-2-3-4-5-6-7-8-9-10-11-12-13-14-15-18(21)17(19)16-20/h17,20H,2-16,19H2,1H3	5.095	59.055	550	0.944	82	63.32	0.212	2
3-demethylubiquinol-9				86583403	84423			C53H82O4	783.218	AFC001478	ALAJATOGWWBPQT-UHFFFAOYSA-N	CC(=CCCC(=CCCC(=CCCC(=CCCC(=CCCC(=CCCC(=CCCC(=CCCC(=CCC1=C(C(=C(C(=C1C)O)O)OC)O)C)C)C)C)C)C)C)C)C	InChI=1S/C53H82O4/c1-39(2)21-13-22-40(3)23-14-24-41(4)25-15-26-42(5)27-16-28-43(6)29-17-30-44(7)31-18-32-45(8)33-19-34-46(9)35-20-36-47(10)37-38-49-48(11)50(54)52(56)53(57-12)51(49)55/h21,23,25,27,29,31,33,35,37,54-56H,13-20,22,24,26,28,30,32,34,36,38H2,1-12H3	16.092	151.165	3543	0.547	258	69.92	0.089	3
3-deoxy-D-arabino-heptulosonate-7-phosphate	2627-73-8	C04691		160647	18150	FDB030419		C7H13O10P	288.146	AFC000574	PJWIPEXIFFQAQZ-UHFFFAOYSA-N	C(C(C(C(COP(=O)(O)O)O)O)O)C(=O)C(=O)O	InChI=1S/C7H13O10P/c8-3(1-4(9)7(12)13)6(11)5(10)2-17-18(14,15)16/h3,5-6,8,10-11H,1-2H2,(H,12,13)(H2,14,15,16)	-3.26	32.638	261	0.714	82	191.63	0.665	1
3-deoxy-D-manno-octulosonate	10149-14-1	C01187		119228	32817	FDB030420		C8H14O8	238.192	AFC000520	KYQCXUMVJGMDNG-UHFFFAOYSA-N	C(C(C(C(C(CO)O)O)O)O)C(=O)C(=O)O	InChI=1S/C8H14O8/c9-2-5(12)7(14)6(13)3(10)1-4(11)8(15)16/h3,5-7,9-10,12-14H,1-2H2,(H,15,16)	-2.96	29.831	204	0.75	70	155.52	0.653	1
3-epi-bryonolol				10343330				C30H50O2	442.718	AFC001235	ZTFHGNGMNAIRAI-UHFFFAOYSA-N	CC1(C)C2CCC3=C(CCC4(C)C5CC(C)(CCC5(C)CCC34C)CO)C2(C)CCC1O	InChI=1S/C30H50O2/c1-25(2)22-9-8-21-20(28(22,5)12-11-24(25)32)10-13-30(7)23-18-26(3,19-31)14-15-27(23,4)16-17-29(21,30)6/h22-24,31-32H,8-19H2,1-7H3	6.408	87.744	690	0.933	198	40.46	0.091	1
3-hexanone	589-38-8		HMDB0000753	11509	89891	FDB008080	LMFA12000049	C6H12O	100.159	AFC000341	PFCHFHIRKBAQGU-UHFFFAOYSA-N	CCCC(=O)CC	InChI=1S/C6H12O/c1-3-5-6(7)4-2/h3-5H2,1-2H3	1.546	19.364	45	0.833	24	17.07	0.171	0
3-hexaprenyl-4-hydroxybenzoate	65848-03-5	C13425	HMDB0006816	11954011	31116	FDB030426	LMPR02010045	C37H54O3	546.824	AFC001175	LKMQQQABIGIHGL-UHFFFAOYSA-N	CC(=CCCC(=CCCC(=CCCC(=CCCC(=CCCC(=CCC1=CC(=CC=C1O)C(=O)O)C)C)C)C)C)C	InChI=1S/C37H54O3/c1-28(2)13-8-14-29(3)15-9-16-30(4)17-10-18-31(5)19-11-20-32(6)21-12-22-33(7)23-24-34-27-35(37(39)40)25-26-36(34)38/h13,15,17,19,21,23,25-27,38H,8-12,14,16,18,20,22,24H2,1-7H3,(H,39,40)	11.355	103.533	1738	0.486	180	57.53	0.105	3
3-hexenal	6789-80-6	C16310	HMDB0031497;HMDB0031498	23234;643941	20030;23292	FDB008083;FDB008085	LMFA06000003;LMFA06000110	C6H10O	98.1432	AFC000386	GXANMBISFKBPEX-UHFFFAOYSA-N	CCC=CCC=O	InChI=1S/C6H10O/c1-2-3-4-5-6-7/h3-4,6H,2,5H2,1H3	1.408	18.03	54	0.5	22	17.07	0.174	0
3-hydroxy-1-(4-hydroxy-3-methoxyphenyl)propan-1-one				75142				C10H12O4	196.2	AFC001796	NXCPMSUBVRGTSE-UHFFFAOYSA-N	COC1=CC(=CC=C1O)C(=O)CCO	InChI=1S/C10H12O4/c1-14-10-6-7(2-3-9(10)13)8(12)4-5-11/h2-3,6,11,13H,4-5H2,1H3	-0.532	28.81	168	0.3	64	66.76	0.34	0
3-hydroxy-1-(4-hydroxyphenyl)propan-1-one			HMDB0040645	638759		FDB020438		C9H10O3	166.174	AFC001797	LTEPZFZSPZASKJ-UHFFFAOYSA-N	C1=C(C=CC(=C1)O)C(=O)CCO	InChI=1S/C9H10O3/c10-6-5-9(12)7-1-3-8(11)4-2-7/h1-4,10-11H,5-6H2	-0.033	24.914	140	0.222	54	57.53	0.346	0
3-hydroxy-3-phenylpropionyl-CoA				70680321	71290	FDB030427		C30H44N7O18P3S	915.695	AFC001464	AAZZVFONLHYNDZ-UHFFFAOYSA-N	CC(C)(COP(=O)(O)OP(=O)(O)OCC1C(C(C(N2C=NC3=C2N=CN=C3N)O1)O)OP(=O)(O)O)C(C(=O)NCCC(=O)NCCSC(=O)CC(C4=CC=CC=C4)O)O	InChI=1S/C30H44N7O18P3S/c1-30(2,25(42)28(43)33-9-8-20(39)32-10-11-59-21(40)12-18(38)17-6-4-3-5-7-17)14-52-58(49,50)55-57(47,48)51-13-19-24(54-56(44,45)46)23(41)29(53-19)37-16-36-22-26(31)34-15-35-27(22)37/h3-7,15-16,18-19,23-25,29,38,41-42H,8-14H2,1-2H3,(H,32,39)(H,33,43)(H,47,48)(H,49,50)(H2,31,34,35)(H2,44,45,46)	-4.693	118.065	3096	0.533	306	435.31	0.476	4
3-hydroxy-5-cis-tetradecenoyl-CoA				91828294	87705			[C35H56N7O18P3S]4-	987.844	AFC001508	KJJPUIFALMAQPF-UHFFFAOYSA-J	CCCCCCCCC=CCC(CC(=O)SCCNC(=O)CCNC(=O)C(C(C)(C)COP(=O)([O-])OP(=O)([O-])OCC1C(C(C(N2C=NC3=C2N=CN=C3N)O1)O)OP(=O)([O-])[O-])O)O	InChI=1S/C35H60N7O18P3S/c1-4-5-6-7-8-9-10-11-12-13-23(43)18-26(45)64-17-16-37-25(44)14-15-38-33(48)30(47)35(2,3)20-57-63(54,55)60-62(52,53)56-19-24-29(59-61(49,50)51)28(46)34(58-24)42-22-41-27-31(36)39-21-40-32(27)42/h11-12,21-24,28-30,34,43,46-47H,4-10,13-20H2,1-3H3,(H,37,44)(H,38,48)(H,52,53)(H,54,55)(H2,36,39,40)(H2,49,50,51)/p-4	-2.612	134.866	3991	0.714	318	446.63	0.452	4
3-hydroxyadipyl-CoA		C14145	HMDB0012475	9543337	71038	FDB030430	LMFA07050211	C27H44N7O20P3S	911.662	AFC001133	OTEACGAEDCIMBS-UHFFFAOYSA-N	CC(C)(COP(=O)(O)OP(=O)(O)OCC1C(C(C(N2C=NC3=C2N=CN=C3N)O1)O)OP(=O)(O)O)C(C(=O)NCCC(=O)NCCSC(=O)CC(CCC(=O)O)O)O	InChI=1S/C27H44N7O20P3S/c1-27(2,22(41)25(42)30-6-5-16(36)29-7-8-58-18(39)9-14(35)3-4-17(37)38)11-51-57(48,49)54-56(46,47)50-10-15-21(53-55(43,44)45)20(40)26(52-15)34-13-33-19-23(28)31-12-32-24(19)34/h12-15,20-22,26,35,40-41H,3-11H2,1-2H3,(H,29,36)(H,30,42)(H,37,38)(H,46,47)(H,48,49)(H2,28,31,32)(H2,43,44,45)	-5.785	114.389	2976	0.667	296	472.61	0.519	4
3-hydroxycinnamic acid	588-30-7	C12621	HMDB0001713	637541	47925	FDB002590		C9H8O3	164.158	AFC000805	KKSDGJDHHZEWEP-UHFFFAOYSA-N	C1=CC(=CC(=C1)C=CC(=O)O)O	InChI=1S/C9H8O3/c10-8-3-1-2-7(6-8)4-5-9(11)12/h1-6,10H,(H,11,12)	0.873	23.58	133	0	54	57.53	0.351	0
3-hydroxypropyl-glucosinolate				14206092				C10H19NO10S2	377.391	AFC001221	WIGYSAIZPJAWDF-UHFFFAOYSA-N	C(CC(=NOS(=O)(=O)O)SC1C(C(C(C(CO)O1)O)O)O)CO	InChI=1S/C10H19NO10S2/c12-3-1-2-6(11-21-23(17,18)19)22-10-9(16)8(15)7(14)5(4-13)20-10/h5,7-10,12-16H,1-4H2,(H,17,18,19)	-2.56	45.189	365	0.9	110	220.02	0.584	1
3-keto-4-methylzymosterol	7377-73-3	C15816	HMDB0000981	22298939	136486	FDB022350	LMST01010237	C28H44O	396.649	AFC001272	DBPZYKHQDWKORQ-UHFFFAOYSA-N	CC(=CCCC(C)C1CCC2C3=C(CCC12C)C4(C)CCC(=O)C(C)C4CC3)C	InChI=1S/C28H44O/c1-18(2)8-7-9-19(3)22-12-13-24-21-10-11-23-20(4)26(29)15-17-28(23,6)25(21)14-16-27(22,24)5/h8,19-20,22-24H,7,9-17H2,1-6H3	7.457	79.421	696	0.821	164	17.07	0.043	1
3-mercaptopyruvate	2464-23-5	C00957	HMDB0001368	98	16208	FDB030434		C3H4O3S	120.128	AFC000013	OJOLFAIGOXZBCI-UHFFFAOYSA-N	C(C(=O)C(=O)O)S	InChI=1S/C3H4O3S/c4-2(1-7)3(5)6/h7H,1H2,(H,5,6)	0.019	13.253	36	0.333	26	93.17	0.776	0
3-methoxy-4-hydroxy-5-all-trans-hexaprenylbenzoate		C05313	HMDB0000977	54692918	57916	FDB022347		[C38H55O4]-	575.842	AFC001450	YSZSVGFMAJXGMQ-UHFFFAOYSA-M	CC(=CCCC(=CCCC(=CCCC(=CCCC(=CCCC(=CCC1=C(C(=CC(=C1)C(=O)O)OC)[O-])C)C)C)C)C)C	InChI=1S/C38H56O4/c1-28(2)14-9-15-29(3)16-10-17-30(4)18-11-19-31(5)20-12-21-32(6)22-13-23-33(7)24-25-34-26-35(38(40)41)27-36(42-8)37(34)39/h14,16,18,20,22,24,26-27,39H,9-13,15,17,19,21,23,25H2,1-8H3,(H,40,41)/p-1	10.178	106.762	1846	0.5	190	69.59	0.121	3
3-methoxy-4-hydroxy-5-all-trans-nonaprenylbenzoate				54738025	62791	FDB030438		[C53H79O4]-	780.194	AFC001454	FDPPBYXDOXRDHA-UHFFFAOYSA-M	CC(=CCCC(=CCCC(=CCCC(=CCCC(=CCCC(=CCCC(=CCCC(=CCCC(=CCC1=C(C(=CC(=C1)C(=O)O)OC)[O-])C)C)C)C)C)C)C)C)C	InChI=1S/C53H80O4/c1-40(2)20-12-21-41(3)22-13-23-42(4)24-14-25-43(5)26-15-27-44(6)28-16-29-45(7)30-17-31-46(8)32-18-33-47(9)34-19-35-48(10)36-37-49-38-50(53(55)56)39-51(57-11)52(49)54/h20,22,24,26,28,30,32,34,36,38-39,54H,12-19,21,23,25,27,29,31,33,35,37H2,1-11H3,(H,55,56)/p-1	15.658	149.165	3547	0.528	256	69.59	0.089	3
3-methoxy-4-hydroxy-5-all-trans-octaprenylbenzoate				54740344	84456	FDB030439		[C48H71O4]-	712.077	AFC001456	DZWHYPVPTJPQQX-UHFFFAOYSA-M	CC(=CCCC(=CCCC(=CCCC(=CCCC(=CCCC(=CCCC(=CCCC(=CCC1=C(C(=CC(=C1)C(=O)O)OC)[O-])C)C)C)C)C)C)C)C	InChI=1S/C48H72O4/c1-36(2)18-11-19-37(3)20-12-21-38(4)22-13-23-39(5)24-14-25-40(6)26-15-27-41(7)28-16-29-42(8)30-17-31-43(9)32-33-44-34-45(48(50)51)35-46(52-10)47(44)49/h18,20,22,24,26,28,30,32,34-35,49H,11-17,19,21,23,25,27,29,31,33H2,1-10H3,(H,50,51)/p-1	13.832	135.03	2920	0.521	234	69.59	0.098	3
3-methyl-2-butenal	107-86-8	C07330	HMDB0012157	61020	15825	FDB008134		C5H8O	84.1166	AFC000419	SEPQTYODOKLVSB-UHFFFAOYSA-N	CC(=CC=O)C	InChI=1S/C5H8O/c1-5(2)3-4-6/h3-4H,1-2H3	1.364	14.936	31	0.4	20	17.07	0.203	0
3-methyl-4-cis-hydroxy-2-butenal				12487266	133364	FDB030442		C5H8O2	100.116	AFC001200	BSHDRMLUCYMQOP-UHFFFAOYSA-N	CC(=CC=O)CO	InChI=1S/C5H8O2/c1-5(4-7)2-3-6/h2-3,7H,4H2,1H3	0.273	15.738	45	0.4	24	37.3	0.373	0
3-methyl-4-trans-hydroxy-2-butenal				22841439	133364	FDB030442;FDB030443		C5H8O2	100.116	AFC001200	BSHDRMLUCYMQOP-UHFFFAOYSA-N	CC(=CC=O)CO	InChI=1S/C5H8O2/c1-5(4-7)2-3-6/h2-3,7H,4H2,1H3	0.273	15.738	45	0.4	24	37.3	0.373	0
3-methylbutanal	590-86-3	C07329	HMDB0006478	11552	16638	FDB003285		C5H10O	86.1325	AFC000342	YGHRJJRRZDOVPD-UHFFFAOYSA-N	CC(C)CC=O	InChI=1S/C5H10O/c1-5(2)3-4-6/h4-5H,3H2,1-2H3	1.192	16.27	31	0.8	20	17.07	0.198	0
3-methylcrotonyl-CoA		C03069	HMDB0001493	99	15486	FDB022652		C26H42N7O17P3S	849.637	AFC000014	BXIPALATIYNHJN-UHFFFAOYSA-N	CC(=CC(=O)SCCNC(=O)CCNC(=O)C(C(C)(C)COP(=O)(O)OP(=O)(O)OCC1C(C(C(N2C=NC3=C2N=CN=C3N)O1)O)OP(=O)(O)O)O)C	InChI=1S/C26H42N7O17P3S/c1-14(2)9-17(35)54-8-7-28-16(34)5-6-29-24(38)21(37)26(3,4)11-47-53(44,45)50-52(42,43)46-10-15-20(49-51(39,40)41)19(36)25(48-15)33-13-32-18-22(27)30-12-31-23(18)33/h9,12-13,15,19-21,25,36-37H,5-8,10-11H2,1-4H3,(H,28,34)(H,29,38)(H,42,43)(H,44,45)(H2,27,30,31)(H2,39,40,41)	-3.869	108.889	2511	0.615	278	415.08	0.489	4
3-methylglutaconyl-CoA	6247-73-0	C03231	HMDB0001057	5462214	15488	FDB022396	LMFA07050235	C27H42N7O19P3S	893.646	AFC001067	GXKSHRDAHFLWPN-UHFFFAOYSA-N	CC(=CC(=O)SCCNC(=O)CCNC(=O)C(C(C)(C)COP(=O)(O)OP(=O)(O)OCC1C(C(C(N2C=NC3=C2N=CN=C3N)O1)O)OP(=O)(O)O)O)CC(=O)O	InChI=1S/C27H42N7O19P3S/c1-14(8-17(36)37)9-18(38)57-7-6-29-16(35)4-5-30-25(41)22(40)27(2,3)11-50-56(47,48)53-55(45,46)49-10-15-21(52-54(42,43)44)20(39)26(51-15)34-13-33-19-23(28)31-12-32-24(19)34/h9,12-13,15,20-22,26,39-40H,4-8,10-11H2,1-3H3,(H,29,35)(H,30,41)(H,36,37)(H,45,46)(H,47,48)(H2,28,31,32)(H2,42,43,44)	-4.716	112.253	2836	0.593	292	452.38	0.507	4
3-methylglutaric acid	626-51-7		HMDB0000752	12284	68566	FDB022224	LMFA01170117	C6H10O4	146.141	AFC000351	XJMMNTGIMDZPMU-UHFFFAOYSA-N	CC(CC(=O)O)CC(=O)O	InChI=1S/C6H10O4/c1-4(2-5(7)8)3-6(9)10/h4H,2-3H2,1H3,(H,7,8)(H,9,10)	0.298	20.436	83	0.667	40	74.6	0.511	0
3-methylsulfinylpropyl glucosinolate	554-88-1	C08411	HMDB0038406	656543	5406	FDB030445		C11H21NO10S3	423.484	AFC000833	PHYYADMVYQURSX-UHFFFAOYSA-N	CS(=O)CCCC(=NOS(=O)(=O)O)SC1C(C(C(C(CO)O1)O)O)O	InChI=1S/C11H21NO10S3/c1-24(17)4-2-3-7(12-22-25(18,19)20)23-11-10(16)9(15)8(14)6(5-13)21-11/h6,8-11,13-16H,2-5H2,1H3,(H,18,19,20)	-2.519	51.183	432	0.909	120	236.07	0.558	0
3-octanone	106-68-3	C17145	HMDB0031295	246728	80946	FDB005050	LMFA12000055	C8H16O	128.212	AFC000626	RHLVCLIPMVJYKS-UHFFFAOYSA-N	CCCCCC(=O)CC	InChI=1S/C8H16O/c1-3-5-6-7-8(9)4-2/h3-7H2,1-2H3	2.458	25.551	85	0.875	32	17.07	0.133	0
3-octaprenyl-4-hydroxybenzoate		C05809		5280831	50116	FDB030449		C47H70O3	683.059	AFC000916	UTIBHEBNILDQKX-UHFFFAOYSA-N	CC(=CCCC(=CCCC(=CCCC(=CCCC(=CCCC(=CCCC(=CCCC(=CCC1=CC(=CC=C1O)C(=O)O)C)C)C)C)C)C)C)C	InChI=1S/C47H70O3/c1-36(2)17-10-18-37(3)19-11-20-38(4)21-12-22-39(5)23-13-24-40(6)25-14-26-41(7)27-15-28-42(8)29-16-30-43(9)31-32-44-35-45(47(49)50)33-34-46(44)48/h17,19,21,23,25,27,29,31,33-35,48H,10-16,18,20,22,24,26,28,30,32H2,1-9H3,(H,49,50)	15.008	131.802	2780	0.511	224	57.53	0.084	3
3'-O-feruloylsucrose	107912-97-0							C22H30O14	518.466	AFC001635	AVZDWQPNGQYBPS-UHFFFAOYSA-N	COC1=CC(=CC=C1O)C=CC(=O)OC2C(C(CO)OC(C2O)OC3(CO)C(C(C(CO)O3)O)O)O	InChI=1S/C22H30O14/c1-32-12-6-10(2-4-11(12)26)3-5-15(27)34-19-16(28)13(7-23)33-21(18(19)30)36-22(9-25)20(31)17(29)14(8-24)35-22/h2-6,13-14,16-21,23-26,28-31H,7-9H2,1H3	-3.327	69.952	984	0.591	186	225.06	0.434	3
3-O-feruloylsucrose								C22H30O14	518.466	AFC001729	ZPEADZHVGOCGKH-UHFFFAOYSA-N	COC1=CC(=CC=C1O)/C=C/C(=O)O[C@H]2[C@@H]([C@@H](CO)O[C@@]2(CO)O[C@@H]3[C@@H]([C@H]([C@@H]([C@@H](CO)O3)O)O)O)O	InChI=1S/C22H30O14/c1-32-12-6-10(2-4-11(12)26)3-5-15(27)34-20-17(29)14(8-24)35-22(20,9-25)36-21-19(31)18(30)16(28)13(7-23)33-21/h2-6,13-14,16-21,23-26,28-31H,7-9H2,1H3	-3.327	69.952	937	0.591	186	225.06	0.434	3
3-O-methylquercetin	1486-70-0	C04443		5280681	16860		LMPK12112729	C16H12O7	316.263	AFC000905	WEPBGSIAWZTEJR-UHFFFAOYSA-N	COC1=C(C2=CC(=C(C=C2)O)O)OC3=C(C(=CC(=C3)O)O)C1=O	InChI=1S/C16H12O7/c1-22-16-14(21)13-11(20)5-8(17)6-12(13)23-15(16)7-2-3-9(18)10(19)4-7/h2-6,17-20H,1H3	-1.179	41.776	383	0.063	124	116.45	0.368	0
3-oxo-2-(cis-2'-pentenyl)-cyclopentane-1-octanoate	204135-86-4			5716902	49265	FDB001433	LMFA02010006	[C18H29O3]-	293.422	AFC001327	BZXZFDKIRZBJEP-UHFFFAOYSA-M	CCC=CCC1C(CCCCCCCC(=O)[O-])CCC1=O	InChI=1S/C18H30O3/c1-2-3-7-11-16-15(13-14-17(16)19)10-8-5-4-6-9-12-18(20)21/h3,7,15-16H,2,4-6,8-14H2,1H3,(H,20,21)/p-1	4.025	53.423	473	0.778	92	57.2	0.195	1
3-oxo-23,24-bisnorchol-4-en-22-oyl-CoA				86208118	84616	FDB030451		C43H66N7O18P3S	1094.01	AFC001474	CJJBDUCNUMWUJX-UHFFFAOYSA-N	CC(C1CCC2C3CCC4=CC(=O)CCC4(C)C3CCC12C)C(=O)SCCNC(=O)CCNC(=O)C(C(C)(C)COP(=O)(O)OP(=O)(O)OCC5C(C(C(N6C=NC7=C6N=CN=C7N)O5)O)OP(=O)(O)O)O	InChI=1S/C43H66N7O18P3S/c1-23(27-8-9-28-26-7-6-24-18-25(51)10-13-42(24,4)29(26)11-14-43(27,28)5)40(56)72-17-16-45-31(52)12-15-46-38(55)35(54)41(2,3)20-65-71(62,63)68-70(60,61)64-19-30-34(67-69(57,58)59)33(53)39(66-30)50-22-49-32-36(44)47-21-48-37(32)50/h18,21-23,26-30,33-35,39,53-54H,6-17,19-20H2,1-5H3,(H,45,52)(H,46,55)(H,60,61)(H,62,63)(H2,44,47,48)(H2,57,58,59)	-0.883	155.614	4552	0.744	398	432.15	0.395	4
3-oxo-3-phenylpropionyl-CoA		C07118		9543204	27388			C30H42N7O18P3S	913.679	AFC001129	NHDPIYICCBKNNJ-UHFFFAOYSA-N	CC(C)(COP(=O)(O)OP(=O)(O)OCC1C(C(C(N2C=NC3=C2N=CN=C3N)O1)O)OP(=O)(O)O)C(C(=O)NCCC(=O)NCCSC(=O)CC(=O)C4=CC=CC=C4)O	InChI=1S/C30H42N7O18P3S/c1-30(2,25(42)28(43)33-9-8-20(39)32-10-11-59-21(40)12-18(38)17-6-4-3-5-7-17)14-52-58(49,50)55-57(47,48)51-13-19-24(54-56(44,45)46)23(41)29(53-19)37-16-36-22-26(31)34-15-35-27(22)37/h3-7,15-16,19,23-25,29,41-42H,8-14H2,1-2H3,(H,32,39)(H,33,43)(H,47,48)(H,49,50)(H2,31,34,35)(H2,44,45,46)	-4.447	116.731	3096	0.5	306	432.15	0.473	4
3-oxopropanoic acid	926-61-4	C00222	HMDB0011111	868	17960	FDB027893		C3H4O3	88.0622	AFC000121	OAKURXIZZOAYBC-UHFFFAOYSA-N	C(C=O)C(=O)O	InChI=1S/C3H4O3/c4-2-1-3(5)6/h2H,1H2,(H,5,6)	-0.397	10.353	31	0.333	20	54.37	0.618	0
3-phospho-D-glycerate	820-11-1	C00197	HMDB0060180	439183	17794	FDB030460		C3H7O7P	186.057	AFC000641	OSJPPGNTCRNQQC-UHFFFAOYSA-N	C(C(C(=O)O)O)OP(=O)(O)O	InChI=1S/C3H7O7P/c4-2(3(5)6)1-10-11(7,8)9/h2,4H,1H2,(H,5,6)(H2,7,8,9)	-2.01	19.192	96	0.667	48	134.1	0.721	0
3-phospho-hydroxypyruvate	3913-50-6	C03232	HMDB0001024	5460375	18110	FDB022377		[C3H2O7P]3-	181.018	AFC001057	LFLUCDOSQPJJBE-UHFFFAOYSA-K	C(C(=O)C(=O)[O-])OP(=O)([O-])[O-]	InChI=1S/C3H5O7P/c4-2(3(5)6)1-10-11(7,8)9/h1H2,(H,5,6)(H2,7,8,9)/p-3	-3.108	15.858	96	0.333	48	139.43	0.771	0
3-phospho-L-serine	407-41-0	C01005	HMDB0000272	68841	15811	FDB021926		C3H8NO6P	185.073	AFC000445	BZQFBWGGLXLEPQ-UHFFFAOYSA-N	C(C(C(=O)O)N)OP(=O)(O)O	InChI=1S/C3H8NO6P/c4-2(3(5)6)1-10-11(7,8)9/h2H,1,4H2,(H,5,6)(H2,7,8,9)	-2.299	20.156	96	0.667	48	139.89	0.756	0
3-S-methylmercaptopropionate	646-01-5	C08276	HMDB0001527	563;6992044	49016	FDB022672	LMFA01130006	[C4H7O2S]-	119.163	AFC001122	CAOMCZAIALVUPA-UHFFFAOYSA-M	CSCCC(=O)[O-]	InChI=1S/C4H8O2S/c1-7-3-2-4(5)6/h2-3H2,1H3,(H,5,6)/p-1	-0.178	16.212	47	0.75	24	65.43	0.55	0
3-sulfinoalanine	1115-65-7	C00606	HMDB0000996	1549098	16345	FDB022358		C3H7NO4S	153.158	AFC000841	ADVPTQAUNPRNPO-UHFFFAOYSA-N	C(C(C(=O)O)N)S(=O)O	InChI=1S/C3H7NO4S/c4-2(3(5)6)1-9(7)8/h2H,1,4H2,(H,5,6)(H,7,8)	-2.01	17.156	63	0.667	36	119.83	0.783	0
3-ureidopropionate	462-88-4	C02642	HMDB0000026	111	18261	FDB030466		C4H8N2O3	132.118	AFC000015	JSJWCHRYRHKBBW-UHFFFAOYSA-N	C(CNC(=O)N)C(=O)O	InChI=1S/C4H8N2O3/c5-4(9)6-2-1-3(7)8/h1-2H2,(H,7,8)(H3,5,6,9)	-1.132	16.98	76	0.5	34	92.42	0.7	0
4-(2'-carboxyphenyl)-4-oxobutyryl-CoA		C03160		129626606	57364	FDB030478		[C32H39N7O20P3S]5-	966.676	AFC001537	KVAQAPQXOXTRAE-UHFFFAOYSA-I	CC(C)(COP(=O)([O-])OP(=O)([O-])OCC1C(C(C(N2C=NC3=C2N=CN=C3N)O1)O)OP(=O)([O-])[O-])C(C(=O)NCCC(=O)NCCSC(=O)CCC(=O)C4=C(C=CC=C4)C(=O)[O-])O	InChI=1S/C32H44N7O20P3S/c1-32(2,26(44)29(45)35-10-9-21(41)34-11-12-63-22(42)8-7-19(40)17-5-3-4-6-18(17)31(46)47)14-56-62(53,54)59-61(51,52)55-13-20-25(58-60(48,49)50)24(43)30(57-20)39-16-38-23-27(33)36-15-37-28(23)39/h3-6,15-16,20,24-26,30,43-44H,7-14H2,1-2H3,(H,34,41)(H,35,45)(H,46,47)(H,51,52)(H,53,54)(H2,33,36,37)(H2,48,49,50)/p-5	-6.86	119.855	3441	0.5	326	483.6	0.501	3
4-(5,5-dimethylcyclohex-1-en-1-yl)cyclohex-1-ene-1-carbaldehyde		C22013		134716636	141851			C15H22O	218.335	AFC001544	FITVEUXUZLYLPG-UHFFFAOYSA-N	CC1(C)CCC=C(C1)C2CC=C(CC2)C=O	InChI=1S/C15H22O/c1-15(2)9-3-4-14(10-15)13-7-5-12(11-16)6-8-13/h4-5,11,13H,3,6-10H2,1-2H3	4.069	41.871	235	0.667	82	17.07	0.078	0
4-(beta-D-ribofuranosyl)aminobenzene-5'-phosphate				71296183	72778			[C11H14NO7P]2-	303.206	AFC001466	UKBUHWIOGWAJEO-UHFFFAOYSA-L	C1=C(C=CC(=C1)N)C2C(C(C(COP(=O)([O-])[O-])O2)O)O	InChI=1S/C11H16NO7P/c12-7-3-1-6(2-4-7)11-10(14)9(13)8(19-11)5-18-20(15,16)17/h1-4,8-11,13-14H,5,12H2,(H2,15,16,17)/p-2	-3.192	39.039	342	0.455	104	157.94	0.521	0
4-(cytidine 5'-diphospho)-2-C-methyl-D-erythritol	263016-94-0	C11435		443199	16578	FDB030479		C14H25N3O14P2	521.308	AFC000743	YFAUKWZNPVBCFF-UHFFFAOYSA-N	CC(CO)(C(COP(=O)(O)OP(=O)(O)OCC1C(C(C(N2C=CC(=NC2=O)N)O1)O)O)O)O	InChI=1S/C14H25N3O14P2/c1-14(23,6-18)8(19)5-29-33(26,27)31-32(24,25)28-4-7-10(20)11(21)12(30-7)17-3-2-9(15)16-13(17)22/h2-3,7-8,10-12,18-21,23H,4-6H2,1H3,(H,24,25)(H,26,27)(H2,15,16,22)	-4.964	63.098	925	0.714	172	290.98	0.558	4
4,4-dimethyl-14alpha-formyl-5alpha-cholesta-8,24-dien-3beta-ol	79294-83-0		HMDB0062378	21121725	166681		LMST01010222	C30H48O2	440.702	AFC001255	PGGIMLIQOHYFIS-UHFFFAOYSA-N	CC(=CCCC(C)C1CCC2(C=O)C3=C(CCC12C)C4(C)CCC(C(C)(C)C4CC3)O)C	InChI=1S/C30H48O2/c1-20(2)9-8-10-21(3)22-14-18-30(19-31)24-11-12-25-27(4,5)26(32)15-16-28(25,6)23(24)13-17-29(22,30)7/h9,19,21-22,25-26,32H,8,10-18H2,1-7H3	7.286	86.41	759	0.833	184	37.3	0.085	1
4,4-dimethyl-14alpha-formyl-5alpha-cholesta-8-en-3beta-ol	59200-40-7		HMDB0062379	15698824	87060		LMST01010223	C30H50O2	442.718	AFC001234	MKMLAQLNFVFNRK-UHFFFAOYSA-N	CC(C)CCCC(C)C1CCC2(C=O)C3=C(CCC12C)C4(C)CCC(C(C)(C)C4CC3)O	InChI=1S/C30H50O2/c1-20(2)9-8-10-21(3)22-14-18-30(19-31)24-11-12-25-27(4,5)26(32)15-16-28(25,6)23(24)13-17-29(22,30)7/h19-22,25-26,32H,8-18H2,1-7H3	7.536	87.744	759	0.9	184	37.3	0.084	1
4,4-dimethyl-14alpha-hydroxymethyl-5alpha-cholesta-8,24-dien-3beta-ol	16910-32-0			22298935	166806		LMST01010124	C30H50O2	442.718	AFC001268	DWVYYKFZEDMMPU-UHFFFAOYSA-N	CC(=CCCC(C)C1CCC2(CO)C3=C(CCC12C)C4(C)CCC(C(C)(C)C4CC3)O)C	InChI=1S/C30H50O2/c1-20(2)9-8-10-21(3)22-14-18-30(19-31)24-11-12-25-27(4,5)26(32)15-16-28(25,6)23(24)13-17-29(22,30)7/h9,21-22,25-26,31-32H,8,10-19H2,1-7H3	7.029	87.744	759	0.867	184	40.46	0.091	1
4,4-dimethyl-14alpha-hydroxymethyl-5alpha-cholesta-8-en-3beta-ol	59200-39-4		HMDB0062380	15698821	87057		LMST01010224	C30H52O2	444.734	AFC001233	SJPDNXKPBQHPMZ-UHFFFAOYSA-N	CC(C)CCCC(C)C1CCC2(CO)C3=C(CCC12C)C4(C)CCC(C(C)(C)C4CC3)O	InChI=1S/C30H52O2/c1-20(2)9-8-10-21(3)22-14-18-30(19-31)24-11-12-25-27(4,5)26(32)15-16-28(25,6)23(24)13-17-29(22,30)7/h20-22,25-26,31-32H,8-19H2,1-7H3	7.279	89.077	759	0.933	184	40.46	0.091	1
4,4-dimethyl-5-alpha-cholesta-8,14,24-trien-3-beta-ol	64284-64-6	C11455	HMDB0001023	443212	17813	FDB022376	LMST01010149	C29H46O	410.676	AFC000748	LFQXEZVYNCBVDO-UHFFFAOYSA-N	CC(=CCCC(C)C1CC=C2C3=C(CCC12C)C4(C)CCC(C(C)(C)C4CC3)O)C	InChI=1S/C29H46O/c1-19(2)9-8-10-20(3)22-12-13-23-21-11-14-25-27(4,5)26(30)16-18-29(25,7)24(21)15-17-28(22,23)6/h9,13,20,22,25-26,30H,8,10-12,14-18H2,1-7H3	7.664	82.514	723	0.793	172	20.23	0.049	1
4,4-dimethyl-5-alpha-cholesta-8,14-dien-3-beta-ol	19456-83-8		HMDB0062381	167817	78904		LMST01010277	C29H48O	412.692	AFC000595	OGQJUYXFIOFTMA-UHFFFAOYSA-N	CC(C)CCCC(C)C1CC=C2C3=C(CCC12C)C4(C)CCC(C(C)(C)C4CC3)O	InChI=1S/C29H48O/c1-19(2)9-8-10-20(3)22-12-13-23-21-11-14-25-27(4,5)26(30)16-18-29(25,7)24(21)15-17-28(22,23)6/h13,19-20,22,25-26,30H,8-12,14-18H2,1-7H3	7.914	83.848	723	0.862	172	20.23	0.049	1
4,4-dimethyl-5alpha-cholesta-8-en-3-beta-ol	5241-24-7	C03541	HMDB0006840	12070223	87044	FDB024106	LMST01010225	C29H50O	414.708	AFC001192	FYHRVINOXYETMN-UHFFFAOYSA-N	CC(C)CCCC(C)C1CCC2C3=C(CCC12C)C4(C)CCC(C(C)(C)C4CC3)O	InChI=1S/C29H50O/c1-19(2)9-8-10-20(3)22-12-13-23-21-11-14-25-27(4,5)26(30)16-18-29(25,7)24(21)15-17-28(22,23)6/h19-20,22-23,25-26,30H,8-18H2,1-7H3	8.164	85.182	723	0.931	172	20.23	0.049	1
4,4-dimethylzymosterol	7448-02-4	C05108	HMDB0001286	165609	18364	FDB030261	LMST01010176	C29H48O	412.692	AFC000594	CHGIKSSZNBCNDW-UHFFFAOYSA-N	CC(=CCCC(C)C1CCC2C3=C(CCC12C)C4(C)CCC(C(C)(C)C4CC3)O)C	InChI=1S/C29H48O/c1-19(2)9-8-10-20(3)22-12-13-23-21-11-14-25-27(4,5)26(30)16-18-29(25,7)24(21)15-17-28(22,23)6/h9,20,22-23,25-26,30H,8,10-18H2,1-7H3	7.914	83.848	723	0.862	172	20.23	0.049	1
4,5-dihydroxy-2,3-pentanedione		C11838		11170991	29484			C5H8O4	132.115	AFC001162	UYTRITJAZOPLCZ-UHFFFAOYSA-N	CC(=O)C(=O)C(CO)O	InChI=1S/C5H8O4/c1-3(7)5(9)4(8)2-6/h4,6,8H,2H2,1H3	-1.477	17.342	61	0.6	36	74.6	0.565	0
4,5-epoxy-2-nonenal				85412273				C9H14O2	154.207	AFC000799	JQNFKXWEJORMGJ-UHFFFAOYSA-N	CCCCC1C(C=CC=O)O1	InChI=1S/C9H14O2/c1-2-3-5-8-9(11-8)6-4-7-10/h4,6-9H,2-3,5H2,1H3	1.896	26.779	142	0.667	48	29.6	0.192	0
4-{[(2S,3R,4R,5S,6R)-3,4,5-trihydroxy-6-(hydroxymethyl)oxan-2-yl]oxy}benzaldehyde				3303383				C13H16O7	284.262	AFC001804	OLZAGZCCJJBKNZ-UHFFFAOYSA-N	C1=C(C=CC(=C1)O[C@H]2[C@@H]([C@@H]([C@@H]([C@@H](CO)O2)O)O)O)C=O	InChI=1S/C13H16O7/c14-5-7-1-3-8(4-2-7)19-13-12(18)11(17)10(16)9(6-15)20-13/h1-5,9-13,15-18H,6H2	-1.639	39.163	354	0.462	100	116.45	0.41	0
4-{[(2S,3R,4S,5S,6R)-3,4,5-trihydroxy-6-(hydroxymethyl)oxan-2-yl]oxy}benzaldehyde				3303383				C13H16O7	284.262	AFC001804	OLZAGZCCJJBKNZ-UHFFFAOYSA-N	C1=C(C=CC(=C1)O[C@H]2[C@@H]([C@H]([C@@H]([C@@H](CO)O2)O)O)O)C=O	InChI=1S/C13H16O7/c14-5-7-1-3-8(4-2-7)19-13-12(18)11(17)10(16)9(6-15)20-13/h1-5,9-13,15-18H,6H2	-1.639	39.163	354	0.462	100	116.45	0.41	0
4-acetamidobutanal	24431-54-7	C05936	HMDB0004226	440850	7386	FDB030480		C6H11NO2	129.157	AFC000725	DDSLGZOYEPKPSJ-UHFFFAOYSA-N	CC(=O)NCCCC=O	InChI=1S/C6H11NO2/c1-6(9)7-4-2-3-5-8/h5H,2-4H2,1H3,(H,7,9)	-0.553	20.599	87	0.667	32	46.17	0.358	0
4-acetamidobutyric acid	3025-96-5	C02946	HMDB0003681	18189	17645	FDB023214		C6H11NO3	145.157	AFC000376	UZTFMUBKZQVKLK-UHFFFAOYSA-N	CC(=O)NCCCC(=O)O	InChI=1S/C6H11NO3/c1-5(8)7-4-2-3-6(9)10/h2-4H2,1H3,(H,7,8)(H,9,10)	-0.601	21.401	100	0.667	38	66.4	0.458	0
4alpha-carboxy-4beta,14alpha-dimethyl-9beta,19-cyclo-5alpha-ergost-24(241)-en-3beta-ol		C22114		137333860	142916			[C31H49O3]-	469.72	AFC001600	RLRGKMMFFVWPHT-UHFFFAOYSA-M	CC(C)C(=C)CCC(C)C1CCC2(C)C3CCC4C(C)(C(CCC54CC35CCC12C)O)C(=O)[O-]	InChI=1S/C31H50O3/c1-19(2)20(3)8-9-21(4)22-12-14-28(6)23-10-11-24-29(7,26(33)34)25(32)13-15-30(24)18-31(23,30)17-16-27(22,28)5/h19,21-25,32H,3,8-18H2,1-2,4-7H3,(H,33,34)/p-1	6.3	89.639	845	0.903	206	60.36	0.129	1
4alpha-carboxy-4beta-methyl-5alpha-cholesta-8,24-dien-3beta-ol		C15808	HMDB0062383	22298938	50591		LMST01010388	C29H48O3	444.691	AFC001271	GLCDBDRQLZKKOJ-UHFFFAOYSA-N	CC(C)CCCC(C)C1CCC2C3=C(CCC12C)C4(C)CCC(C(C)(C4CC3)C(=O)O)O	InChI=1S/C29H48O3/c1-18(2)8-7-9-19(3)21-11-12-22-20-10-13-24-28(5,23(20)14-16-27(21,22)4)17-15-25(30)29(24,6)26(31)32/h18-19,21-22,24-25,30H,7-17H2,1-6H3,(H,31,32)	7.282	85.452	781	0.897	182	57.53	0.129	1
4alpha-carboxy-4beta-methyl-5alpha-cholesta-8-en-3beta-ol			HMDB0062384	44263317	87277		LMST01010227	C29H48O3	444.691	AFC001271	GLCDBDRQLZKKOJ-UHFFFAOYSA-N	CC(C)CCCC(C)C1CCC2C3=C(CCC12C)C4(C)CCC(C(C)(C4CC3)C(=O)O)O	InChI=1S/C29H48O3/c1-18(2)8-7-9-19(3)21-11-12-22-20-10-13-24-28(5,23(20)14-16-27(21,22)4)17-15-25(30)29(24,6)26(31)32/h18-19,21-22,24-25,30H,7-17H2,1-6H3,(H,31,32)	7.282	85.452	781	0.897	182	57.53	0.129	1
4alpha-carboxy-5alpha-cholesta-8,24-dien-3beta-ol		C22112	HMDB0062385	42608397		FDB030522	LMST01010152	C28H44O3	428.648	AFC001370	JHIWIFRQJXLNEU-UHFFFAOYSA-N	CC(=CCCC(C)C1CCC2C3=C(CCC12C)C4(C)CCC(C(C4CC3)C(=O)O)O)C	InChI=1S/C28H44O3/c1-17(2)7-6-8-18(3)20-11-12-21-19-9-10-23-25(26(30)31)24(29)14-16-28(23,5)22(19)13-15-27(20,21)4/h7,18,20-21,23-25,29H,6,8-16H2,1-5H3,(H,30,31)	6.615	81.025	754	0.821	174	57.53	0.134	1
4alpha-carboxy-5alpha-cholesta-8-en-3beta-ol			HMDB0062386	44263318	87293		LMST01010228	C28H46O3	430.664	AFC001382	RODBXVVNKJCWQR-UHFFFAOYSA-N	CC(C)CCCC(C)C1CCC2C3=C(CCC12C)C4(C)CCC(C(C4CC3)C(=O)O)O	InChI=1S/C28H46O3/c1-17(2)7-6-8-18(3)20-11-12-21-19-9-10-23-25(26(30)31)24(29)14-16-28(23,5)22(19)13-15-27(20,21)4/h17-18,20-21,23-25,29H,6-16H2,1-5H3,(H,30,31)	6.865	82.358	754	0.893	174	57.53	0.134	1
4alpha-carboxy-ergosta-7,24(241)-dien-3beta-ol				102515460	142850			[C29H45O3]-	441.667	AFC001524	URESBFJPXATWDO-UHFFFAOYSA-M	CC(C)C(=C)CCC(C)C1CCC2C3=CCC4C(C(CCC4(C)C3CCC12C)O)C(=O)[O-]	InChI=1S/C29H46O3/c1-17(2)18(3)7-8-19(4)21-11-12-22-20-9-10-24-26(27(31)32)25(30)14-16-29(24,6)23(20)13-15-28(21,22)5/h9,17,19,21-26,30H,3,7-8,10-16H2,1-2,4-6H3,(H,31,32)/p-1	6.048	83.452	781	0.828	180	60.36	0.137	1
4alpha-carboxy-stigmasta-7,24(241)-dien-3beta-ol		C22120		102515427	142919			[C30H47O3]-	455.694	AFC001523	PLFNGFVQAIAQFS-UHFFFAOYSA-M	CC=C(CCC(C)C1CCC2C3=CCC4C(C(CCC4(C)C3CCC12C)O)C(=O)[O-])C(C)C	InChI=1S/C30H48O3/c1-7-20(18(2)3)9-8-19(4)22-12-13-23-21-10-11-25-27(28(32)33)26(31)15-17-30(25,6)24(21)14-16-29(22,23)5/h7,10,18-19,22-27,31H,8-9,11-17H2,1-6H3,(H,32,33)/p-1	6.451	86.545	810	0.833	184	60.36	0.133	1
4alpha-formyl,4beta,14alpha-dimethyl-9beta,19-cyclo-5alpha-ergost-24(241)-en-3beta-ol		C22115		137333861	142918			C31H50O2	454.729	AFC001601	FAQRUJCAUFLERP-UHFFFAOYSA-N	CC(C)C(=C)CCC(C)C1CCC2(C)C3CCC4C(C)(C=O)C(CCC54CC35CCC12C)O	InChI=1S/C31H50O2/c1-20(2)21(3)8-9-22(4)23-12-14-29(7)25-11-10-24-27(5,19-32)26(33)13-15-30(24)18-31(25,30)17-16-28(23,29)6/h19-20,22-26,33H,3,8-18H2,1-2,4-7H3	7.025	89.504	816	0.903	200	37.3	0.082	1
4alpha-formyl-4beta-methyl-5alpha-cholesta-8,24-dien-3beta-ol			HMDB0062387	22298937	87287		LMST01010229	C29H46O2	426.675	AFC001270	GFGANDKVOKQAGH-UHFFFAOYSA-N	CC(=CCCC(C)C1CCC2C3=C(CCC12C)C4(C)CCC(C(C)(C=O)C4CC3)O)C	InChI=1S/C29H46O2/c1-19(2)8-7-9-20(3)22-11-12-23-21-10-13-25-28(5,24(21)14-16-27(22,23)4)17-15-26(31)29(25,6)18-30/h8,18,20,22-23,25-26,31H,7,9-17H2,1-6H3	7.079	83.316	752	0.828	176	37.3	0.087	1
4alpha-formyl-4beta-methyl-5alpha-cholesta-8-en-3beta-ol			HMDB0062388	44263319	87046	FDB030530	LMST01010230	C29H48O2	428.691	AFC001383	WWTBBRMTEFBUND-UHFFFAOYSA-N	CC(C)CCCC(C)C1CCC2C3=C(CCC12C)C4(C)CCC(C(C)(C=O)C4CC3)O	InChI=1S/C29H48O2/c1-19(2)8-7-9-20(3)22-11-12-23-21-10-13-25-28(5,24(21)14-16-27(22,23)4)17-15-26(31)29(25,6)18-30/h18-20,22-23,25-26,31H,7-17H2,1-6H3	7.329	84.65	752	0.897	176	37.3	0.087	1
4alpha-formyl-5alpha-cholesta-8,24-dien-3beta-ol			HMDB0062389	22298941	146131		LMST01010226	C28H44O2	412.649	AFC001274	ZLQSSFNCEUGGJF-UHFFFAOYSA-N	CC(=CCCC(C)C1CCC2C3=C(CCC12C)C4(C)CCC(C(C=O)C4CC3)O)C	InChI=1S/C28H44O2/c1-18(2)7-6-8-19(3)22-11-12-23-20-9-10-24-21(17-29)26(30)14-16-28(24,5)25(20)13-15-27(22,23)4/h7,17,19,21-24,26,30H,6,8-16H2,1-5H3	6.662	80.223	725	0.821	168	37.3	0.09	1
4alpha-formyl-5alpha-cholesta-8-en-3beta-ol			HMDB0012169	44263320	87054	FDB028823	LMST01010231	C28H46O2	414.665	AFC001384	MHYWFGFPMGLYBL-UHFFFAOYSA-N	CC(C)CCCC(C)C1CCC2C3=C(CCC12C)C4(C)CCC(C(C=O)C4CC3)O	InChI=1S/C28H46O2/c1-18(2)7-6-8-19(3)22-11-12-23-20-9-10-24-21(17-29)26(30)14-16-28(24,5)25(20)13-15-27(22,23)4/h17-19,21-24,26,30H,6-16H2,1-5H3	6.912	81.556	725	0.893	168	37.3	0.09	1
4alpha-formyl-ergosta-7,24(241)-dien-3beta-ol		C22118		102515184	142849			C29H46O2	426.675	AFC001519	RFKHEEQSEZBUAP-UHFFFAOYSA-N	CC(C)C(=C)CCC(C)C1CCC2C3=CCC4C(C=O)C(CCC4(C)C3CCC12C)O	InChI=1S/C29H46O2/c1-18(2)19(3)7-8-20(4)23-11-12-24-21-9-10-25-22(17-30)27(31)14-16-29(25,6)26(21)13-15-28(23,24)5/h9,17-18,20,22-27,31H,3,7-8,10-16H2,1-2,4-6H3	6.774	83.316	752	0.828	174	37.3	0.087	1
4alpha-formyl-stigmasta-7,24(241)-dien-3beta-ol				102515345	142929	FDB030532		C30H48O2	440.702	AFC001520	YTPAERFJSRKUSQ-UHFFFAOYSA-N	CC=C(CCC(C)C1CCC2C3=CCC4C(C=O)C(CCC4(C)C3CCC12C)O)C(C)C	InChI=1S/C30H48O2/c1-7-21(19(2)3)9-8-20(4)24-12-13-25-22-10-11-26-23(18-31)28(32)15-17-30(26,6)27(22)14-16-29(24,25)5/h7,10,18-20,23-28,32H,8-9,11-17H2,1-6H3	7.176	86.41	781	0.833	178	37.3	0.085	1
4alpha-hydroxymethyl-4beta-methyl-5alpha-cholesta-8,24-dien-3beta-ol			HMDB0062390	22298936	87289		LMST01010232	C29H48O2	428.691	AFC001269	LEUVIESGHNFBEK-UHFFFAOYSA-N	CC(=CCCC(C)C1CCC2C3=C(CCC12C)C4(C)CCC(C(C)(CO)C4CC3)O)C	InChI=1S/C29H48O2/c1-19(2)8-7-9-20(3)22-11-12-23-21-10-13-25-28(5,24(21)14-16-27(22,23)4)17-15-26(31)29(25,6)18-30/h8,20,22-23,25-26,30-31H,7,9-18H2,1-6H3	6.823	84.65	752	0.862	176	40.46	0.094	1
4alpha-hydroxymethyl-4beta-methyl-5alpha-cholesta-8-en-3beta-ol			HMDB0062391	44263321	87045		LMST01010233	C29H50O2	430.707	AFC001385	UVSRXDFMOZKKGE-UHFFFAOYSA-N	CC(C)CCCC(C)C1CCC2C3=C(CCC12C)C4(C)CCC(C(C)(CO)C4CC3)O	InChI=1S/C29H50O2/c1-19(2)8-7-9-20(3)22-11-12-23-21-10-13-25-28(5,24(21)14-16-27(22,23)4)17-15-26(31)29(25,6)18-30/h19-20,22-23,25-26,30-31H,7-18H2,1-6H3	7.073	85.984	752	0.931	176	40.46	0.094	1
4alpha-hydroxymethyl-5alpha-cholesta-8,24-dien-3beta-ol			HMDB0062392	22298940	146130		LMST01010234	C28H46O2	414.665	AFC001273	ORZKEIGPXNMCHC-UHFFFAOYSA-N	CC(=CCCC(C)C1CCC2C3=C(CCC12C)C4(C)CCC(C(CO)C4CC3)O)C	InChI=1S/C28H46O2/c1-18(2)7-6-8-19(3)22-11-12-23-20-9-10-24-21(17-29)26(30)14-16-28(24,5)25(20)13-15-27(22,23)4/h7,19,21-24,26,29-30H,6,8-17H2,1-5H3	6.42	81.556	725	0.857	168	40.46	0.098	1
4alpha-hydroxymethyl-5alpha-cholesta-8-en-3beta-ol			HMDB0012173	44263322	87053	FDB028827	LMST01010235	C28H48O2	416.681	AFC001386	UPEGTKGKNWDIAN-UHFFFAOYSA-N	CC(C)CCCC(C)C1CCC2C3=C(CCC12C)C4(C)CCC(C(CO)C4CC3)O	InChI=1S/C28H48O2/c1-18(2)7-6-8-19(3)22-11-12-23-20-9-10-24-21(17-29)26(30)14-16-28(24,5)25(20)13-15-27(22,23)4/h18-19,21-24,26,29-30H,6-17H2,1-5H3	6.67	82.89	725	0.929	168	40.46	0.097	1
4alpha-hydroxymethyl-ergosta-7,24(241)-dien-3beta-ol		C22117		102515391	142848	FDB030539		C29H48O2	428.691	AFC001522	QFGCPIMZVWPNNF-UHFFFAOYSA-N	CC(C)C(=C)CCC(C)C1CCC2C3=CCC4C(CO)C(CCC4(C)C3CCC12C)O	InChI=1S/C29H48O2/c1-18(2)19(3)7-8-20(4)23-11-12-24-21-9-10-25-22(17-30)27(31)14-16-29(25,6)26(21)13-15-28(23,24)5/h9,18,20,22-27,30-31H,3,7-8,10-17H2,1-2,4-6H3	6.531	84.65	752	0.862	174	40.46	0.094	1
4alpha-hydroxymethyl-stigmasta-7,24(241)-dien-3beta-ol				102515003	142928	FDB030540		C30H50O2	442.718	AFC001517	NUAGPLGAOGOSCQ-UHFFFAOYSA-N	CC=C(CCC(C)C1CCC2C3=CCC4C(CO)C(CCC4(C)C3CCC12C)O)C(C)C	InChI=1S/C30H50O2/c1-7-21(19(2)3)9-8-20(4)24-12-13-25-22-10-11-26-23(18-31)28(32)15-17-30(26,6)27(22)14-16-29(24,25)5/h7,10,19-20,23-28,31-32H,8-9,11-18H2,1-6H3	6.933	87.744	781	0.867	178	40.46	0.091	1
4alpha-methyl-5alpha-cholesta-8-en-3-one			HMDB0062393	44263323	87050	FDB028828	LMST01010236	C28H46O	398.665	AFC001387	SDZUXFFGOQZLPK-UHFFFAOYSA-N	CC(C)CCCC(C)C1CCC2C3=C(CCC12C)C4(C)CCC(=O)C(C)C4CC3	InChI=1S/C28H46O/c1-18(2)8-7-9-19(3)22-12-13-24-21-10-11-23-20(4)26(29)15-17-28(23,6)25(21)14-16-27(22,24)5/h18-20,22-24H,7-17H2,1-6H3	7.707	80.754	696	0.893	164	17.07	0.043	1
4alpha-methyl-5alpha-ergosta-8,14,24(28)-trien-3beta-ol	74635-33-9	C11508	HMDB0006928	443237	30109	FDB011216	LMST01031020	C29H46O	410.676	AFC000749	HLAWVOWADPNAGN-UHFFFAOYSA-N	CC(C)C(=C)CCC(C)C1CC=C2C3=C(CCC12C)C4(C)CCC(C(C)C4CC3)O	InChI=1S/C29H46O/c1-18(2)19(3)8-9-20(4)23-12-13-25-22-10-11-24-21(5)27(30)15-17-29(24,7)26(22)14-16-28(23,25)6/h13,18,20-21,23-24,27,30H,3,8-12,14-17H2,1-2,4-7H3	7.696	82.514	723	0.793	170	20.23	0.049	1
4alpha-methyl-5alpha-ergosta-8,24-dien-3beta-ol	17757-07-2	C15776	HMDB0006845	193524	80094	FDB012688	LMST01031019	C29H48O	412.692	AFC000618	QLDNWJOJCDIMKK-UHFFFAOYSA-N	CC(C)C(=C)CCC(C)C1CCC2C3=C(CCC12C)C4(C)CCC(C(C)C4CC3)O	InChI=1S/C29H48O/c1-18(2)19(3)8-9-20(4)23-12-13-25-22-10-11-24-21(5)27(30)15-17-29(24,7)26(22)14-16-28(23,25)6/h18,20-21,23-25,27,30H,3,8-17H2,1-2,4-7H3	7.946	83.848	723	0.862	170	20.23	0.049	1
4alpha-methyl-cholesta-8-enol	5241-22-5	C05110	HMDB0062394	6452640	87051		LMST01010197	C28H48O	400.681	AFC001105	SCEZIHJVTBQOLS-UHFFFAOYSA-N	CC(C)CCCC(C)C1CCC2C3=C(CCC12C)C4(C)CCC(C(C)C4CC3)O	InChI=1S/C28H48O/c1-18(2)8-7-9-19(3)22-12-13-24-21-10-11-23-20(4)26(29)15-17-28(23,6)25(21)14-16-27(22,24)5/h18-20,22-24,26,29H,7-17H2,1-6H3	7.89	82.088	696	0.929	164	20.23	0.051	1
4alpha-methylzymosterol	7448-03-5	C05103	HMDB0001217	22212495	1949	FDB022496	LMST01010202	C28H46O	398.665	AFC001267	FOUJWBXBKVVHCJ-UHFFFAOYSA-N	CC(=CCCC(C)C1CCC2C3=C(CCC12C)C4(C)CCC(C(C)C4CC3)O)C	InChI=1S/C28H46O/c1-18(2)8-7-9-19(3)22-12-13-24-21-10-11-23-20(4)26(29)15-17-28(23,6)25(21)14-16-27(22,24)5/h8,19-20,22-24,26,29H,7,9-17H2,1-6H3	7.64	80.754	696	0.857	164	20.23	0.051	1
4-amino-2-methyl-5-diphosphomethylpyrimidine	841-01-0	C04752		217	16629	FDB030484		C6H11N3O7P2	299.115	AFC000031	AGQJQCFEPUVXNK-UHFFFAOYSA-N	CC1=NC(=C(C=N1)COP(=O)(O)OP(=O)(O)O)N	InChI=1S/C6H11N3O7P2/c1-4-8-2-5(6(7)9-4)3-15-18(13,14)16-17(10,11)12/h2H,3H2,1H3,(H,13,14)(H2,7,8,9)(H2,10,11,12)	-2.527	34.069	278	0.333	90	183.65	0.614	0
4-amino-2-methyl-5-phosphomethylpyrimidine		C04556		216	18032	FDB030485		C6H10N3O4P	219.135	AFC000030	PKYFHKIYHBRTPI-UHFFFAOYSA-N	CC1=NC(=C(C=N1)COP(=O)(O)O)N	InChI=1S/C6H10N3O4P/c1-4-8-2-5(6(7)9-4)3-13-14(10,11)12/h2H,3H2,1H3,(H2,7,8,9)(H2,10,11,12)	-1.717	27.366	170	0.333	68	127.31	0.581	0
4-amino-4-deoxychorismate	97279-79-3	C11355		45266632	58406	FDB030486		[C10H10NO5]-	224.19	AFC001392	OIUJHGOLFKDBSU-UHFFFAOYSA-M	C=C(C(=O)[O-])OC1C=C(C=CC1[NH3+])C(=O)[O-]	InChI=1S/C10H11NO5/c1-5(9(12)13)16-8-4-6(10(14)15)2-3-7(8)11/h2-4,7-8H,1,11H2,(H,12,13)(H,14,15)/p-1	-2.844	29.378	196	0.2	76	117.13	0.523	0
4-aminobenzoate	2906-28-7	C00568	HMDB0001392	4876	17836	FDB030487		[C7H6NO2]-	136.128	AFC000206	ALYNCZNDIQEVRV-UHFFFAOYSA-M	C1=C(C=CC(=C1)N)C(=O)[O-]	InChI=1S/C7H7NO2/c8-6-3-1-5(2-4-6)7(9)10/h1-4H,8H2,(H,9,10)/p-1	-0.907	19.025	88	0	46	66.15	0.486	0
4-aminobutyrate	56-12-2	C00334	HMDB0000112	119	16865	FDB008937		C4H9NO2	103.12	AFC000016	BTCSSZJGUNDROE-UHFFFAOYSA-N	C(CC(=O)O)CN	InChI=1S/C4H9NO2/c5-3-1-2-4(6)7/h1-3,5H2,(H,6,7)	-0.622	15.745	47	0.75	24	63.32	0.614	0
4-butyrolactone	96-48-0	C01770	HMDB0000549	7302	42639	FDB003392		C4H6O2	86.0894	AFC001787	YEJRWHAVMIAJKC-UHFFFAOYSA-N	C1CC(=O)OC1	InChI=1S/C4H6O2/c5-4-2-1-3-6-4/h1-3H2	0.277	12.645	29	0.75	26	26.3	0.306	0
4-Caffeoyl-glucose				129715972				C15H18O9	342.299	AFC001644	QXFVPIMQXCNEPV-UHFFFAOYSA-N	C1=C(/C=C/C(=O)[C@@]([C@@H](CO)O)([C@@H]([C@H](C=O)O)O)O)C=C(C(=C1)O)O	InChI=1S/C15H18O9/c16-6-11(20)14(23)15(24,13(22)7-17)12(21)4-2-8-1-3-9(18)10(19)5-8/h1-6,11,13-14,17-20,22-24H,7H2	-2.633	45.62	442	0.333	116	175.75	0.514	1
4-carboxylato-2-hydroxyhexa-2,4-dienedioate(3-)		C04324		54749447	17424		LMFA01170072	[C7H3O7]3-	199.095	AFC001458	QWLUKZXOQAQUFQ-UHFFFAOYSA-K	C(=C(C(=O)[O-])[O-])C(=CC(=O)O)C(=O)[O-]	InChI=1S/C7H6O7/c8-4(7(13)14)1-3(6(11)12)2-5(9)10/h1-2,8H,(H,9,10)(H,11,12)(H,13,14)/p-3	-2.576	19.934	142	0	60	140.62	0.707	0
4-carboxylatomethylenebut-2-en-4-olide			HMDB0060518	9543248	57263			[C6H3O4]-	139.086	AFC001130	AYFXPGXAZMFWNH-UHFFFAOYSA-M	C1=CC(=O)OC1=CC(=O)[O-]	InChI=1S/C6H4O4/c7-5(8)3-4-1-2-6(9)10-4/h1-3H,(H,7,8)/p-1	-0.52	15.768	91	0	46	66.43	0.478	0
4-coumaroyl-CoA	119785-99-8	C00223	HMDB0060153	6440013	15499	FDB001608	LMFA07050265	C30H42N7O18P3S	913.679	AFC001096	DMZOKBALNZWDKI-UHFFFAOYSA-N	CC(C)(COP(=O)(O)OP(=O)(O)OCC1C(C(C(N2C=NC3=C2N=CN=C3N)O1)O)OP(=O)(O)O)C(C(=O)NCCC(=O)NCCSC(=O)C=CC4=CC=C(C=C4)O)O	InChI=1S/C30H42N7O18P3S/c1-30(2,25(42)28(43)33-10-9-20(39)32-11-12-59-21(40)8-5-17-3-6-18(38)7-4-17)14-52-58(49,50)55-57(47,48)51-13-19-24(54-56(44,45)46)23(41)29(53-19)37-16-36-22-26(31)34-15-35-27(22)37/h3-8,15-16,19,23-25,29,38,41-42H,9-14H2,1-2H3,(H,32,39)(H,33,43)(H,47,48)(H,49,50)(H2,31,34,35)(H2,44,45,46)	-4.313	116.731	3183	0.467	306	435.31	0.477	4
4-coumaroylshikimate		C02947		25245116	57768	FDB030493		[C16H15O7]-	319.287	AFC001347	GVECSFFLZYNEBO-UHFFFAOYSA-M	C1=C(C=CC(=C1)O)C=CC(=O)OC2CC(=CC(C2O)O)C(=O)[O-]	InChI=1S/C16H16O7/c17-11-4-1-9(2-5-11)3-6-14(19)23-13-8-10(16(21)22)7-12(18)15(13)20/h1-7,12-13,15,17-18,20H,8H2,(H,21,22)/p-1	-0.375	43.776	487	0.25	114	127.12	0.398	0
4-coumaryl alcohol	3690-05-9;20649-40-5	C02646	HMDB0003654	5280535	64555	FDB030494		C9H10O2	150.175	AFC000890	PTNLHDGQWUGONS-UHFFFAOYSA-N	C(=CC1=CC=C(C=C1)O)CO	InChI=1S/C9H10O2/c10-7-1-2-8-3-5-9(11)6-4-8/h1-6,10-11H,7H2	0.664	24.112	129	0.111	48	40.46	0.27	0
4-ethyl-2-hexynal	71932-97-3			144524				C8H12O	124.181	AFC000552	XZYAPQCJDYFPBN-UHFFFAOYSA-N	CCC(CC)C#CC=O	InChI=1S/C8H12O/c1-3-8(4-2)6-5-7-9/h7-8H,3-4H2,1-2H3	2.66	22.884	74	0.625	32	17.07	0.138	0
4-feruloylquinide								C17H18O8	350.321	AFC001636	OIGFDFULTVHQNZ-UHFFFAOYSA-N	COC1=CC(=CC=C1O)C=CC(=O)OC2C(CC3(CC2OC3=O)O)O	InChI=1S/C17H18O8/c1-23-12-6-9(2-4-10(12)18)3-5-14(20)25-15-11(19)7-17(22)8-13(15)24-16(17)21/h2-6,11,13,15,18-19,22H,7-8H2,1H3	-0.8	48.338	557	0.412	134	122.52	0.35	0
4-fumaryl-acetoacetate	5698-52-2	C01036	HMDB0001268	5280393	47904	FDB022522	LMFA01170114	C8H8O6	200.146	AFC000875	GACSIVHAIFQKTC-UHFFFAOYSA-N	C(=CC(=O)O)C(=O)CC(=O)CC(=O)O	InChI=1S/C8H8O6/c9-5(1-2-7(11)12)3-6(10)4-8(13)14/h1-2H,3-4H2,(H,11,12)(H,13,14)	-0.47	24.226	180	0.25	58	108.74	0.544	0
4-guanidinobutyramide	4210-97-3			123	18062			C5H12N4O	144.175	AFC000017	YHVFECVVGNXFKO-UHFFFAOYSA-N	C(CC(=O)N)CN=C(N)N	InChI=1S/C5H12N4O/c6-4(10)2-1-3-9-5(7)8/h1-3H2,(H2,6,10)(H4,7,8,9)	-1.358	22.004	100	0.6	38	107.49	0.746	0
4-guanidinobutyrate	463-00-3		HMDB0003464	500	15728	FDB002246		C5H11N3O2	145.16	AFC000072	TUHVEAJXIMEOSA-UHFFFAOYSA-N	C(CC(=O)O)CN=C(N)N	InChI=1S/C5H11N3O2/c6-5(7)8-3-1-2-4(9)10/h1-3H2,(H,9,10)(H4,6,7,8)	-0.756	21.039	100	0.6	38	101.7	0.701	0
4H-pyran-4-one	108-97-4			7968	37966			C5H4O2	96.0843	AFC000294	CVQUWLDCFXOXEN-UHFFFAOYSA-N	C1=COC=CC1=O	InChI=1S/C5H4O2/c6-5-1-3-7-4-2-5/h1-4H	-0.524	13.071	45	0	30	26.3	0.274	0
4-hydroxy-3-methoxymandelate	55-10-7	C05584	HMDB0133489	1245	20106	FDB021931		C9H10O5	198.173	AFC000195	CGQCWMIAEPEHNQ-UHFFFAOYSA-N	COC1=CC(=CC=C1O)C(C(=O)O)O	InChI=1S/C9H10O5/c1-14-7-4-5(2-3-6(7)10)8(11)9(12)13/h2-4,8,10-11H,1H3,(H,12,13)	-0.604	26.518	152	0.222	66	86.99	0.439	0
4-hydroxy-6-methylquinoline-3-carboxylic acid	35973-18-3			253823				C11H9NO3	203.194	AFC001876	MBHYBSDKDMRZAA-UHFFFAOYSA-N	CC1=CC=C2C(=C1)C(=O)C(=CN2)C(=O)O	InChI=1S/C11H9NO3/c1-6-2-3-9-7(4-6)10(13)8(5-12-9)11(14)15/h2-5H,1H3,(H,12,13)(H,14,15)	0.035	28.867	174	0.091	78	66.4	0.327	0
4-hydroxybenzoate	456-23-5	C00156	HMDB0000500	54675830	17879	FDB030501		[C7H5O3]-	137.113	AFC001447	FJKROLUGYXJWQN-UHFFFAOYSA-M	C1=C(C=CC(=C1)[O-])C(=O)O	InChI=1S/C7H6O3/c8-6-3-1-5(2-4-6)7(9)10/h1-4,8H,(H,9,10)/p-1	-0.273	18.06	88	0	46	60.36	0.441	0
4-hydroxybenzoic acid	99-96-7	C00156	HMDB0000500	135	30763	FDB010508		C7H6O3	138.121	AFC000019	FJKROLUGYXJWQN-UHFFFAOYSA-N	C1=C(C=CC(=C1)O)C(=O)O	InChI=1S/C7H6O3/c8-6-3-1-5(2-4-6)7(9)10/h1-4,8H,(H,9,10)	0.405	18.727	88	0	46	57.53	0.417	0
4-hydroxybutyrate	1320-61-2	C00989	HMDB0000710	3037032	16724	FDB022196		[C4H7O3]-	103.097	AFC000852	SJZRECIVHVDYJC-UHFFFAOYSA-M	C(CC(=O)[O-])CO	InChI=1S/C4H8O3/c5-3-1-2-4(6)7/h5H,1-3H2,(H,6,7)/p-1	-1.01	14.114	47	0.75	24	60.36	0.586	0
4-hydroxyphenylpyruvate	156-39-8	C01179	HMDB0000707	979	15999	FDB030506		C9H8O4	180.158	AFC000150	KKADPXVIOXHVKN-UHFFFAOYSA-N	C1=C(C=CC(=C1)O)CC(=O)C(=O)O	InChI=1S/C9H8O4/c10-7-3-1-6(2-4-7)5-8(11)9(12)13/h1-4,10H,5H2,(H,12,13)	0.176	24.382	157	0.111	60	74.6	0.414	0
4-hydroxysphing-8-enine(1+)		C21024;C21025		86290044	83175		LMSP01030002;LMSP01080009	[C18H38NO3]+	316.5	AFC001477	CQKNELOTFUSOTP-UHFFFAOYSA-O	CCCCCCCCCC=CCCCC(C(C(CO)[NH3+])O)O	InChI=1S/C18H37NO3/c1-2-3-4-5-6-7-8-9-10-11-12-13-14-17(21)18(22)16(19)15-20/h10-11,16-18,20-22H,2-9,12-15,19H2,1H3/p+1	2.718	60.524	579	0.889	88	88.33	0.279	2
4-hydroxysphinganine	245118-15-4	C12144	HMDB0004610	122121	46961	FDB023381	LMSP01030001	C18H39NO3	317.508	AFC001467	AERBNCYCJBRYDG-UHFFFAOYSA-N	CCCCCCCCCCCCCCC(C(C(CO)N)O)O	InChI=1S/C18H39NO3/c1-2-3-4-5-6-7-8-9-10-11-12-13-14-17(21)18(22)16(19)15-20/h16-18,20-22H,2-15,19H2,1H3	4.167	61.191	579	1	88	86.71	0.273	2
4-maleyl-acetoacetate			HMDB0002052	5460066	17105	FDB030509		[C8H6O6]2-	198.13	AFC001047	GACSIVHAIFQKTC-UHFFFAOYSA-L	C(=CC(=O)[O-])C(=O)CC(=O)CC(=O)[O-]	InChI=1S/C8H8O6/c9-5(1-2-7(11)12)3-6(10)4-8(13)14/h1-2H,3-4H2,(H,11,12)(H,13,14)/p-2	-1.825	22.893	180	0.25	58	114.4	0.578	0
4-methyl-2-oxopentanoate	816-66-0	C00233	HMDB0000695	70	48430	FDB030510		C6H10O3	130.142	AFC000009	BKAJNAXTPSGJCU-UHFFFAOYSA-N	CC(C)CC(=O)C(=O)O	InChI=1S/C6H10O3/c1-4(2)3-5(7)6(8)9/h4H,3H2,1-2H3,(H,8,9)	0.881	19.634	63	0.667	36	54.37	0.418	0
4-methyl-5-(2-phosphonooxyethyl)thiazole		C04327		1137	17857	FDB030511		C6H10NO4PS	223.188	AFC000183	OCYMERZCMYJQQO-UHFFFAOYSA-N	CC1=C(CCOP(=O)(O)O)SC=N1	InChI=1S/C6H10NO4PS/c1-5-6(13-4-7-5)2-3-11-12(8,9)10/h4H,2-3H2,1H3,(H2,8,9,10)	-0.626	28.066	151	0.5	62	114.23	0.512	0
4-methyl-5-(beta-hydroxyethyl)thiazole	137-00-8	C04294	HMDB0032985	1136	17957	FDB030512		C6H9NOS	143.208	AFC000182	BKAWJIRCKVUVED-UHFFFAOYSA-N	CC1=C(CCO)SC=N1	InChI=1S/C6H9NOS/c1-5-6(2-3-8)9-4-7-5/h4,8H,2-3H2,1H3	0.184	21.363	73	0.5	40	57.89	0.405	0
4-nonenal	2277-16-9		HMDB0032535	5283337		FDB010405	LMFA06000043	C9H16O	140.223	AFC000974	QPULDJYQYDGZEI-UHFFFAOYSA-N	CCCCC=CCCC=O	InChI=1S/C9H16O/c1-2-3-4-5-6-7-8-9-10/h5-6,9H,2-4,7-8H2,1H3	2.777	27.311	122	0.667	34	17.07	0.122	0
4-O-beta-D-glucosyl-4-coumaric acid	14364-05-7	C04415	HMDB0039509	9840292	83032	FDB021351		C15H18O8	326.299	AFC001140	LJFYQZQUAULRDF-UHFFFAOYSA-N	C1=C(C=CC(=C1)OC2C(C(C(C(CO)O2)O)O)O)C=CC(=O)O	InChI=1S/C15H18O8/c16-7-10-12(19)13(20)14(21)15(23-10)22-9-4-1-8(2-5-9)3-6-11(17)18/h1-6,10,12-16,19-21H,7H2,(H,17,18)	-1.218	44.818	480	0.4	114	136.68	0.419	0
4-O-caffeoylshikimic acid	180842-65-3		HMDB0033997	49821869		FDB012231		C16H16O8	336.294	AFC001421	VTURJKQJEXSKNY-UHFFFAOYSA-N	C1=C(C=CC(=O)OC2C(C=C(CC2O)C(=O)O)O)C=C(C(=C1)O)O	InChI=1S/C16H16O8/c17-10-3-1-8(5-11(10)18)2-4-14(21)24-15-12(19)6-9(16(22)23)7-13(15)20/h1-6,12-13,15,17-20H,7H2,(H,22,23)	-0.26	45.245	535	0.25	120	144.52	0.43	0
4-O-feruloyl-D-quinic acid			HMDB0240453	10177048	18013	FDB000248		C17H20O9	368.336	AFC001148	VTMFDSJJVNQXLT-UHFFFAOYSA-N	COC1=CC(=CC=C1O)C=CC(=O)OC2C(CC(CC2O)(C(=O)O)O)O	InChI=1S/C17H20O9/c1-25-13-6-9(2-4-10(13)18)3-5-14(21)26-15-11(19)7-17(24,16(22)23)8-12(15)20/h2-6,11-12,15,18-20,24H,7-8H2,1H3,(H,22,23)	-1.409	50.474	587	0.412	132	153.75	0.418	0
4-oxobutanoate	692-29-5	C00232	HMDB0001259	9543238	57706	FDB022516		[C4H5O3]-	101.081	AFC001131	UIUJIQZEACWQSV-UHFFFAOYSA-M	C(CC(=O)[O-])C=O	InChI=1S/C4H6O3/c5-3-1-2-4(6)7/h3H,1-2H2,(H,6,7)/p-1	-1.04	12.78	47	0.5	24	57.2	0.566	0
4-oxononanal	74327-29-0		HMDB0034716	156288		FDB013252		C9H16O2	156.222	AFC000564	MGOKSQNXXRPCMD-UHFFFAOYSA-N	CCCCCC(=O)CCC=O	InChI=1S/C9H16O2/c1-2-3-4-6-9(11)7-5-8-10/h8H,2-7H2,1H3	1.659	28.113	133	0.778	40	34.14	0.219	0
4-phospho-hydroxy-L-threonine		C06055	HMDB0006802	440901	18336	FDB024088		C4H10NO7P	215.099	AFC001479	FKHAKIJOKDGEII-UHFFFAOYSA-N	C(C(C(C(=O)O)N)O)OP(=O)(O)O	InChI=1S/C4H10NO7P/c5-3(4(7)8)2(6)1-12-13(9,10)11/h2-3,6H,1,5H2,(H,7,8)(H2,9,10,11)	-2.81	24.052	133	0.75	58	160.12	0.745	0
4'-phosphopantetheine	2226-71-3	C01134	HMDB0001416	987	16858	FDB030470		C11H23N2O7PS	358.35	AFC000153	JDMUPRLRUUMCTL-UHFFFAOYSA-N	CC(C)(COP(=O)(O)O)C(C(=O)NCCC(=O)NCCS)O	InChI=1S/C11H23N2O7PS/c1-11(2,7-20-21(17,18)19)9(15)10(16)13-4-3-8(14)12-5-6-22/h9,15,22H,3-7H2,1-2H3,(H,12,14)(H,13,16)(H2,17,18,19)	-1.752	49.04	447	0.818	100	193.8	0.541	0
4-prenylphlorisovalerophenone	54614-64-1			13411740	134341			C16H22O4	278.344	AFC001203	LWLGKGHHVBVDKB-UHFFFAOYSA-N	CC(=CCC1=C(C=C(C(=C1O)C(=O)CC(C)C)O)O)C	InChI=1S/C16H22O4/c1-9(2)5-6-11-12(17)8-14(19)15(16(11)20)13(18)7-10(3)4/h5,8,10,17,19-20H,6-7H2,1-4H3	2.456	46.037	296	0.438	96	77.76	0.28	0
4-pyridoxic acid	82-82-6	C00847	HMDB0000017	6723	17405	FDB021874		C8H9NO4	183.162	AFC001867	HXACOUQIXZGNBF-UHFFFAOYSA-N	CC1=C(C(=C(C=N1)CO)C(=O)O)O	InChI=1S/C8H9NO4/c1-4-7(11)6(8(12)13)5(3-10)2-9-4/h2,10-11H,3H2,1H3,(H,12,13)	-0.749	24.389	115	0.25	62	90.12	0.492	0
4-pyridoxolactone	4753-19-9	C00971	HMDB0003454	151228	16871	FDB023177		C8H7NO3	165.146	AFC000560	HHPDVQLBYQFYFA-UHFFFAOYSA-N	CC1=C(C2=C(C=N1)COC2=O)O	InChI=1S/C8H7NO3/c1-4-7(10)6-5(2-9-4)3-12-8(6)11/h2,10H,3H2,1H3	-0.14	22.254	106	0.25	64	58.89	0.357	0
5-(methylthio)-2,3-dioxopentyl phosphate	115974-73-7	C15650	HMDB0059620	561	50604	FDB030557		C6H11O6PS	242.188	AFC000078	HKEAOVFNWRDVAJ-UHFFFAOYSA-N	CSCCC(=O)C(=O)COP(=O)(O)O	InChI=1S/C6H11O6PS/c1-14-3-2-5(7)6(8)4-12-13(9,10)11/h2-4H2,1H3,(H2,9,10,11)	-1.047	29.237	178	0.667	60	136.01	0.562	0
5,10-methenyltetrahydrofolate	7444-29-3	C00445	HMDB0001354	135398657	57455	FDB022573		[C20H22N7O6]+	456.433	AFC001578	MEANFMOQMXYMCT-UHFFFAOYSA-O	C1=C(C=CC(=C1)N2CC3CNC4=C(C(=O)NC(=N4)N)[N+]3=C2)C(=O)NC(CCC(=O)O)C(=O)O	InChI=1S/C20H21N7O6/c21-20-24-16-15(18(31)25-20)27-9-26(8-12(27)7-22-16)11-3-1-10(2-4-11)17(30)23-13(19(32)33)5-6-14(28)29/h1-4,9,12-13H,5-8H2,(H6-,21,22,23,24,25,28,29,30,31,32,33)/p+1	-3.597	62.381	980	0.3	176	189.46	0.415	2
5,10-methylenetetrahydrofolate	31690-11-6	C00143	HMDB0001533	135398644	15636	FDB022675		[C20H21N7O6]2-	455.425	AFC001576	QYNUQALWYRSVHF-UHFFFAOYSA-L	C1=C(C=CC(=C1)N2CC3CNC4=C(C(=O)NC(=N4)N)N3C2)C(=O)NC(CCC(=O)[O-])C(=O)[O-]	InChI=1S/C20H23N7O6/c21-20-24-16-15(18(31)25-20)27-9-26(8-12(27)7-22-16)11-3-1-10(2-4-11)17(30)23-13(19(32)33)5-6-14(28)29/h1-4,12-13H,5-9H2,(H,23,30)(H,28,29)(H,32,33)(H4,21,22,24,25,31)/p-2	-2.796	61.715	980	0.35	176	195.35	0.429	1
5,24-stigmastadienol						FDB031307		C29H48O	412.692	AFC001637	NMISAXIZQLWBQM-UHFFFAOYSA-N	CC(=C(CCC(C)C1CCC2C3CC=C4CCCCC4(C)C3CCC12C)CCO)C	InChI=1S/C29H48O/c1-20(2)22(16-19-30)10-9-21(3)25-13-14-26-24-12-11-23-8-6-7-17-28(23,4)27(24)15-18-29(25,26)5/h11,21,24-27,30H,6-10,12-19H2,1-5H3	8.04	83.848	736	0.862	166	20.23	0.049	1
5,3'-dihydroxyflavone	6665-68-5			676030				C15H10O4	254.238	AFC001884	SZMQXDYEGKRZDG-UHFFFAOYSA-N	C1=CC(=CC(=C1)O)C2=CC(=O)C3=C(C=CC=C3O)O2	InChI=1S/C15H10O4/c16-10-4-1-3-9(7-10)14-8-12(18)15-11(17)5-2-6-13(15)19-14/h1-8,16-17H	0.446	36.276	293	0	102	66.76	0.263	0
5',5'''-diadenosine triphosphate			HMDB0001155	25201180	27775	FDB022454		[C20H24N10O16P3]3-	753.384	AFC001309	QCICUPZZLIQAPA-UHFFFAOYSA-K	C(C1C(C(C(N2C=NC3=C2N=CN=C3N)O1)O)O)OP(=O)([O-])OP(=O)([O-])OP(=O)([O-])OCC4C(C(C(N5C=NC6=C5N=CN=C6N)O4)O)O	InChI=1S/C20H27N10O16P3/c21-15-9-17(25-3-23-15)29(5-27-9)19-13(33)11(31)7(43-19)1-41-47(35,36)45-49(39,40)46-48(37,38)42-2-8-12(32)14(34)20(44-8)30-6-28-10-16(22)24-4-26-18(10)30/h3-8,11-14,19-20,31-34H,1-2H2,(H,35,36)(H,37,38)(H,39,40)(H2,21,23,25)(H2,22,24,26)/p-3	-8.217	85.925	2022	0.5	276	418.8	0.556	4
5,6-dihydrouracil	504-07-4	C00429	HMDB0000076	649	15901	FDB030556		C4H6N2O2	114.103	AFC000086	OIVLITBTBDPEFK-UHFFFAOYSA-N	C1CNC(=O)NC1=O	InChI=1S/C4H6N2O2/c7-3-1-2-5-4(8)6-3/h1-2H2,(H2,5,6,7,8)	-0.912	14.845	54	0.5	36	58.2	0.51	0
5,6-dihydroxyindole	3131-52-0	C05578	HMDB0004058	114683	27404	FDB023293		C8H7NO2	149.147	AFC000514	SGNZYJXNUURYCH-UHFFFAOYSA-N	C1=CNC2=C1C=C(C(=C2)O)O	InChI=1S/C8H7NO2/c10-7-3-5-1-2-9-6(5)4-8(7)11/h1-4,9-11H	-0.839	21.452	100	0	58	52.49	0.352	0
5,7,22,24(28)-ergostatetraenol		C05440		11090531	18249		LMST01031015	C28H42O	394.634	AFC001160	SQFQJKZSFOZDJY-UHFFFAOYSA-N	CC(C)C(=C)C=CC(C)C1CCC2C3=CC=C4CC(CCC4(C)C3CCC12C)O	InChI=1S/C28H42O/c1-18(2)19(3)7-8-20(4)24-11-12-25-23-10-9-21-17-22(29)13-15-27(21,5)26(23)14-16-28(24,25)6/h7-10,18,20,22,24-26,29H,3,11-17H2,1-2,4-6H3	6.737	78.087	696	0.714	164	20.23	0.051	1
5,7,24(28)-ergostatrienol		C15778	HMDB0060404	46173808	80095		LMST01031015	C28H44O	396.649	AFC001155	ZEPNVCGPJXYABB-UHFFFAOYSA-N	CC(C)C(=C)CCC(C)C1CCC2C3=CC=C4CC(CCC4(C)C3CCC12C)O	InChI=1S/C28H44O/c1-18(2)19(3)7-8-20(4)24-11-12-25-23-10-9-21-17-22(29)13-15-27(21,5)26(23)14-16-28(24,25)6/h9-10,18,20,22,24-26,29H,3,7-8,11-17H2,1-2,4-6H3	7.182	79.421	696	0.786	164	20.23	0.051	1
5,7-dihydroxy-2-(4-hydroxyphenyl)-6-[(4-hydroxyphenyl)methyl]-8-[(2S,3R,4R,5S,6R)-3,4,5-trihydroxy-6-(hydroxymethyl)oxan-2-yl]chromen-4-one				102446088				C28H26O11	538.501	AFC001812	IFNYXORISMJQJH-UHFFFAOYSA-N	C1=C(C=CC(=C1)O)CC2=C(C(=C3C(=C2O)C(=O)C=C(C4=CC=C(C=C4)O)O3)[C@H]5[C@@H]([C@H]([C@@H]([C@@H](CO)O5)O)O)O)O	InChI=1S/C28H26O11/c29-11-19-24(35)25(36)26(37)28(39-19)21-23(34)16(9-12-1-5-14(30)6-2-12)22(33)20-17(32)10-18(38-27(20)21)13-3-7-15(31)8-4-13/h1-8,10,19,24-26,28-31,33-37H,9,11H2	-1.643	75.439	973	0.25	214	197.37	0.367	3
5,7-dihydroxy-2-(4-hydroxyphenyl)-8-[(4-hydroxyphenyl)methyl]-6-[(2S,3R,4R,5S,6R)-3,4,5-trihydroxy-6-(hydroxymethyl)oxan-2-yl]chromen-4-one				102446088				C28H26O11	538.501	AFC001811	QSEKYEYPJACWFH-UHFFFAOYSA-N	C1=C(C=CC(=C1)O)CC2=C3C(=C(C(=C2O)[C@H]4[C@@H]([C@H]([C@@H]([C@@H](CO)O4)O)O)O)O)C(=O)C=C(C5=CC=C(C=C5)O)O3	InChI=1S/C28H26O11/c29-11-19-23(34)25(36)26(37)28(39-19)21-22(33)16(9-12-1-5-14(30)6-2-12)27-20(24(21)35)17(32)10-18(38-27)13-3-7-15(31)8-4-13/h1-8,10,19,23,25-26,28-31,33-37H,9,11H2	-1.643	75.439	962	0.25	214	197.37	0.367	3
5,7-dihydroxy-2-(4-methoxyphenyl)-6-[(2S,3R,4R,5S,6R)-3,4,5-trihydroxy-6-(hydroxymethyl)oxan-2-yl]chromen-4-one				74977540				C22H22O10	446.405	AFC001818	AQHMJUSCGYYXRM-UHFFFAOYSA-N	COC1=CC=C(C=C1)C2=CC(=O)C3=C(C(=C(C=C3O2)O)[C@H]4[C@@H]([C@H]([C@@H]([C@@H](CO)O4)O)O)O)O	InChI=1S/C22H22O10/c1-30-10-4-2-9(3-5-10)13-6-11(24)16-14(31-13)7-12(25)17(19(16)27)22-21(29)20(28)18(26)15(8-23)32-22/h2-7,15,18,20-23,25-29H,8H2,1H3	-2.484	61.409	825	0.318	174	166.14	0.372	1
5,7-dihydroxy-6-[(2S,3R,4R,5S,6R)-3,4,5-trihydroxy-6-(hydroxymethyl)oxan-2-yl]-2-(4-{[(2S,3R,4S,5S,6R)-3,4,5-trihydroxy-6-(hydroxymethyl)oxan-2-yl]oxy}phenyl)chromen-4-one				73981632				C27H30O15	594.519	AFC001809	SFNFQCXADNWOCI-UHFFFAOYSA-N	C1=CC(=CC=C1C2=CC(=O)C3=C(C(=C(C=C3O2)O)[C@H]4[C@@H]([C@H]([C@@H]([C@@H](CO)O4)O)O)O)O)O[C@H]5[C@@H]([C@H]([C@@H]([C@@H](CO)O5)O)O)O	InChI=1S/C27H30O15/c28-7-15-19(32)22(35)24(37)26(41-15)18-12(31)6-14-17(21(18)34)11(30)5-13(40-14)9-1-3-10(4-2-9)39-27-25(38)23(36)20(33)16(8-29)42-27/h1-6,15-16,19-20,22-29,31-38H,7-8H2	-4.64	79.554	1414	0.444	230	256.29	0.431	3
5,7-dihydroxy-8-[(4-hydroxyphenyl)methyl]-6-[(2S,3R,4R,5S,6R)-3,4,5-trihydroxy-6-(hydroxymethyl)oxan-2-yl]-2-(4-{[(2S,3R,4S,5S,6R)-3,4,5-trihydroxy-6-(hydroxymethyl)oxan-2-yl]oxy}phenyl)chromen-4-one								C34H36O16	700.641	AFC001824	SQHLGKXVTSPZLS-UHFFFAOYSA-N	C1=C(C=CC(=C1)O)CC2=C3C(=C(C(=C2O)[C@H]4[C@@H]([C@H]([C@@H]([C@@H](CO)O4)O)O)O)O)C(=O)C=C(C5=CC=C(C=C5)O[C@H]6[C@@H]([C@H]([C@@H]([C@@H](CO)O6)O)O)O)O3	InChI=1S/C34H36O16/c35-11-20-25(40)28(43)30(45)33(49-20)23-24(39)17(9-13-1-5-15(37)6-2-13)32-22(27(23)42)18(38)10-19(48-32)14-3-7-16(8-4-14)47-34-31(46)29(44)26(41)21(12-36)50-34/h1-8,10,20-21,25-26,28-31,33-37,39-46H,9,11-12H2	-3.734	96.677	1705	0.382	274	276.52	0.395	3
5alpha-cholesta-8,24-dien-3-one		C22136		22298942	52386		LMST01010168	C27H42O	382.623	AFC001275	AUNLIRXIJAVBNM-UHFFFAOYSA-N	CC(=CCCC(C)C1CCC2C3=C(CCC12C)C4(C)CCC(=O)CC4CC3)C	InChI=1S/C27H42O/c1-18(2)7-6-8-19(3)23-11-12-24-22-10-9-20-17-21(28)13-15-26(20,4)25(22)14-16-27(23,24)5/h7,19-20,23-24H,6,8-17H2,1-5H3	6.995	76.327	669	0.815	158	17.07	0.045	1
5alpha-cholesta-8-en-3-one			HMDB0062414	44263324	87056	FDB028832	LMST01010239	C27H44O	384.639	AFC001388	RZSXSHNNQBIPTL-UHFFFAOYSA-N	CC(C)CCCC(C)C1CCC2C3=C(CCC12C)C4(C)CCC(=O)CC4CC3	InChI=1S/C27H44O/c1-18(2)7-6-8-19(3)23-11-12-24-22-10-9-20-17-21(28)13-15-26(20,4)25(22)14-16-27(23,24)5/h18-20,23-24H,6-17H2,1-5H3	7.245	77.661	669	0.889	158	17.07	0.044	1
5alpha-cholestan-3-one	566-88-1	C03238	HMDB0000871	92128	17762	FDB022292	LMST01010174	C27H46O	386.655	AFC000478	PESKGJQREUXSRR-UHFFFAOYSA-N	CC(C)CCCC(C)C1CCC2C3CCC4CC(=O)CCC4(C)C3CCC12C	InChI=1S/C27H46O/c1-18(2)7-6-8-19(3)23-11-12-24-22-10-9-20-17-21(28)13-15-26(20,4)25(22)14-16-27(23,24)5/h18-20,22-25H,6-17H2,1-5H3	7.3	78.994	669	0.963	158	17.07	0.044	1
5-alpha-pregnane-3,20-dione	566-65-4	C03681	HMDB0003759	92810	28952	FDB023222	LMST02030170	C21H32O2	316.478	AFC000483	XMRPGKVKISIQBV-UHFFFAOYSA-N	CC(=O)C1CCC2C3CCC4CC(=O)CCC4(C)C3CCC12C	InChI=1S/C21H32O2/c1-13(22)17-6-7-18-16-5-4-14-12-15(23)8-10-20(14,2)19(16)9-11-21(17,18)3/h14,16-19H,4-12H2,1-3H3	3.409	59.901	416	0.905	136	34.14	0.108	1
5-amino-1-(5-phospho-D-ribosyl)imidazole	25635-88-5	C03373	HMDB0001235	16048619	28843	FDB022504		C8H14N3O7P	295.187	AFC001243	PDACUKOKVHBVHJ-UHFFFAOYSA-N	C1=C(N)N(C=N1)C2C(C(C(COP(=O)(O)O)O2)O)O	InChI=1S/C8H14N3O7P/c9-5-1-10-3-11(5)8-7(13)6(12)4(18-8)2-17-19(14,15)16/h1,3-4,6-8,12-13H,2,9H2,(H2,14,15,16)	-3.692	35.959	280	0.625	100	167.88	0.569	0
5-amino-6-(5-phospho-D-ribitylamino)uracil	71491-01-5	C04454	HMDB0003841	18666812	18247	FDB023235		C9H17N4O9P	356.227	AFC001250	RQRINYISXYAZKL-UHFFFAOYSA-N	C(C(C(C(COP(=O)(O)O)O)O)O)NC1=C(C(=O)NC(=O)N1)N	InChI=1S/C9H17N4O9P/c10-5-7(12-9(18)13-8(5)17)11-1-3(14)6(16)4(15)2-22-23(19,20)21/h3-4,6,14-16H,1-2,10H2,(H2,19,20,21)(H3,11,12,13,17,18)	-4.878	42.423	437	0.556	112	233.51	0.656	2
5-amino-6-(5-phospho-D-ribosylamino)uracil		C01268		25245199	58453	FDB030560		[C9H13N4O9P]2-	352.195	AFC001349	LZEXYCAGPMYXLX-UHFFFAOYSA-L	C(C1C(C(C(NC2=C(C(=O)NC(=O)N2)N)O1)O)O)OP(=O)([O-])[O-]	InChI=1S/C9H15N4O9P/c10-3-6(12-9(17)13-7(3)16)11-8-5(15)4(14)2(22-8)1-21-23(18,19)20/h2,4-5,8,14-15H,1,10H2,(H2,18,19,20)(H3,11,12,13,16,17)/p-2	-5.119	39.756	409	0.556	120	228.17	0.648	2
5-amino-6-(D-ribitylamino)uracil	17014-74-3	C04732	HMDB0011106	193516	15934	FDB027889		C9H16N4O6	276.247	AFC000617	XKQZIXVJVUPORE-UHFFFAOYSA-N	C(C(C(C(CO)O)O)O)NC1=C(C(=O)NC(=O)N1)N	InChI=1S/C9H16N4O6/c10-5-7(12-9(19)13-8(5)18)11-1-3(15)6(17)4(16)2-14/h3-4,6,14-17H,1-2,10H2,(H3,11,12,13,18,19)	-4.068	35.721	301	0.556	90	177.17	0.642	1
5-amino-levulinate	106-60-5	C00430	HMDB0001149	137	17549	FDB022452		C5H9NO3	131.13	AFC000020	ZGXJTSGNIOSYLO-UHFFFAOYSA-N	C(CC(=O)O)C(=O)CN	InChI=1S/C5H9NO3/c6-3-4(7)1-2-5(8)9/h1-3,6H2,(H,8,9)	-1.172	18.307	74	0.6	34	80.39	0.613	0
5-androstene-3,17-dione	571-36-8	C20252		160531	83865			C19H26O2	286.409	AFC000570	SQGZFRITSMYKRH-UHFFFAOYSA-N	CC12CCC(=O)CC2=CCC3C4CCC(=O)C4(C)CCC31	InChI=1S/C19H26O2/c1-18-9-7-13(20)11-12(18)3-4-14-15-5-6-17(21)19(15,2)10-8-16(14)18/h3,14-16H,4-11H2,1-2H3	2.872	52.381	349	0.789	126	34.14	0.119	0
5-beta-pregnan-3,20 dione	128-23-4	C05479		92745	30154		LMST02030146	C21H32O2	316.478	AFC000483	XMRPGKVKISIQBV-UHFFFAOYSA-N	CC(=O)C1CCC2C3CCC4CC(=O)CCC4(C)C3CCC12C	InChI=1S/C21H32O2/c1-13(22)17-6-7-18-16-5-4-14-12-15(23)8-10-20(14,2)19(16)9-11-21(17,18)3/h14,16-19H,4-12H2,1-3H3	3.409	59.901	416	0.905	136	34.14	0.108	1
5-dehydroavenasterol		C15783	HMDB0006852	23724575	80097	FDB024118	LMST01040155	C29H46O	410.676	AFC001283	XPRWWANUPMYKMF-UHFFFAOYSA-N	CC=C(CCC(C)C1CCC2C3=CC=C4CC(CCC4(C)C3CCC12C)O)C(C)C	InChI=1S/C29H46O/c1-7-21(19(2)3)9-8-20(4)25-12-13-26-24-11-10-22-18-23(30)14-16-28(22,5)27(24)15-17-29(25,26)6/h7,10-11,19-20,23,25-27,30H,8-9,12-18H2,1-6H3	7.584	82.514	725	0.793	168	20.23	0.049	1
5-dehydroepisterol	23582-83-4	C15780	HMDB0006848	10894570	52972	FDB024117	LMST01030135	C28H44O	396.649	AFC001155	ZEPNVCGPJXYABB-UHFFFAOYSA-N	CC(C)C(=C)CCC(C)C1CCC2C3=CC=C4CC(CCC4(C)C3CCC12C)O	InChI=1S/C28H44O/c1-18(2)19(3)7-8-20(4)24-11-12-25-23-10-9-21-17-22(29)13-15-27(21,5)26(23)14-16-28(24,25)6/h9-10,18,20,22,24-26,29H,3,7-8,11-17H2,1-2,4-6H3	7.182	79.421	696	0.786	164	20.23	0.051	1
5-dehydrokarounidiol				10094697				C30H46O2	438.686	AFC001781	WDJWPKSFUUKJFX-UHFFFAOYSA-N	CC1(C)C2=CC=C3C(=CCC4(C)C5CC(C)(CCC5(C)CCC34C)CO)C2(C)CCC1O	InChI=1S/C30H46O2/c1-25(2)22-9-8-21-20(28(22,5)12-11-24(25)32)10-13-30(7)23-18-26(3,19-31)14-15-27(23,4)16-17-29(21,30)6/h8-10,23-24,31-32H,11-19H2,1-7H3	5.713	85.076	690	0.8	198	40.46	0.092	1
5'-deoxy-5'-methylthioadenosine	2457-80-9	C00170		439176	17509			C11H15N5O3S	297.335	AFC000639	WUUGFSXJNOTRMR-UHFFFAOYSA-N	CSCC1C(C(C(N2C=NC3=C2N=CN=C3N)O1)O)O	InChI=1S/C11H15N5O3S/c1-20-2-5-7(17)8(18)11(19-5)16-4-15-6-9(12)13-3-14-10(6)16/h3-5,7-8,11,17-18H,2H2,1H3,(H2,12,13,14)	-1.622	40.168	330	0.545	108	141.33	0.476	0
5'-deoxyadenosine	4754-39-6	C05198	HMDB0001983	439182	17319	FDB022781		C10H13N5O3	251.242	AFC000640	XGYIMTFOTBMPFP-UHFFFAOYSA-N	CC1C(C(C(N2C=NC3=C2N=CN=C3N)O1)O)O	InChI=1S/C10H13N5O3/c1-4-6(16)7(17)10(18-4)15-3-14-5-8(11)12-2-13-9(5)15/h2-4,6-7,10,16-17H,1H3,(H2,11,12,13)	-1.887	34.174	248	0.5	100	116.03	0.462	0
5-deoxy-D-glucuronate		C16737		46878459	58852			[C6H9O6]-	177.132	AFC001409	HPITTXOWHLWIEK-UHFFFAOYSA-M	C(C(C(C(C=O)O)O)O)C(=O)[O-]	InChI=1S/C6H10O6/c7-2-4(9)6(12)3(8)1-5(10)11/h2-4,6,8-9,12H,1H2,(H,10,11)/p-1	-2.607	21.373	116	0.667	50	117.89	0.666	0
5-enolpyruvyl-shikimate-3-phosphate				14506801	57701			[C10H9O10P]4-	320.147	AFC001223	QUTYKIXIUDQOLK-UHFFFAOYSA-J	C=C(C(=O)[O-])OC1CC(=CC(C1O)OP(=O)([O-])[O-])C(=O)[O-]	InChI=1S/C10H13O10P/c1-4(9(12)13)19-6-2-5(10(14)15)3-7(8(6)11)20-21(16,17)18/h3,6-8,11H,1-2H2,(H,12,13)(H,14,15)(H2,16,17,18)/p-4	-3.685	35.251	291	0.4	104	191.95	0.6	0
5-formamido-1-(5-phospho-D-ribosyl)imidazole-4-carboxamide(2-)		C04734	HMDB0062708	45266654	58467	FDB031113		[C10H13N4O9P]2-	364.206	AFC001393	ABCOOORLYAOBOZ-UHFFFAOYSA-L	C(C1C(C(C(N2C=NC(=C2NC=O)C(=O)N)O1)O)O)OP(=O)([O-])[O-]	InChI=1S/C10H15N4O9P/c11-8(18)5-9(13-3-15)14(2-12-5)10-7(17)6(16)4(23-10)1-22-24(19,20)21/h2-4,6-7,10,16-17H,1H2,(H2,11,18)(H,13,15)(H2,19,20,21)/p-2	-5.185	41.516	419	0.5	124	219.71	0.604	1
5-formyl-tetrahydrofolate	58-05-9	C03479		135403648	65340	FDB030567		C20H23N7O7	473.44	AFC001585	VVIAGPKUTFNRDU-UHFFFAOYSA-N	C1=C(C=CC(=C1)NCC2CNC3=C(C(=O)NC(=N3)N)N2C=O)C(=O)NC(CCC(=O)O)C(=O)O	InChI=1S/C20H23N7O7/c21-20-25-16-15(18(32)26-20)27(9-28)12(8-23-16)7-22-11-3-1-10(2-4-11)17(31)24-13(19(33)34)5-6-14(29)30/h1-4,9,12-13,22H,5-8H2,(H,24,31)(H,29,30)(H,33,34)(H4,21,23,25,26,32)	-2.597	63.85	1046	0.3	172	215.55	0.456	2
5-hydroxy-2-oxo-4-ureido-2,5-dihydro-1H imidazole-5-carboxylate		C12248	HMDB0059663	443736	31132	FDB001617		C5H6N4O5	202.125	AFC000761	WHKYNCPIXMNTRQ-UHFFFAOYSA-N	C1(=NC(=O)NC1(C(=O)O)O)NC(=O)N	InChI=1S/C5H6N4O5/c6-3(12)7-1-5(14,2(10)11)9-4(13)8-1/h14H,(H,10,11)(H4,6,7,8,9,12,13)	-1.804	21.211	131	0.2	70	154.11	0.763	0
5-hydroxy-coniferaldehyde	249647-14-1	C12204		5282094	31134	FDB030570		C10H10O4	194.184	AFC000958	IEHPLRVWOHZKCS-UHFFFAOYSA-N	COC1=C(C(=CC(=C1)C=CC=O)O)O	InChI=1S/C10H10O4/c1-14-9-6-7(3-2-4-11)5-8(12)10(9)13/h2-6,12-13H,1H3	-0.142	27.476	170	0.1	64	66.76	0.344	0
5-hydroxyferulate	2041-35-2	C05619	HMDB0035484	54740354	144056	FDB014170		[C10H9O5]-	209.176	AFC001457	YFXWTVLDSKSYLW-UHFFFAOYSA-M	COC1=C(C(=CC(=C1)C=CC(=O)O)O)[O-]	InChI=1S/C10H10O5/c1-15-8-5-6(2-3-9(12)13)4-7(11)10(8)14/h2-5,11,14H,1H3,(H,12,13)/p-1	-0.867	27.611	185	0.1	70	89.82	0.43	0
5-hydroxyhexanoic acid	44843-89-2		HMDB0000525	170748	131434	FDB022093	LMFA01050014	C6H12O3	132.158	AFC000597	YDCRNMJQROAWFT-UHFFFAOYSA-N	CC(CCCC(=O)O)O	InChI=1S/C6H12O3/c1-5(7)3-2-4-6(8)9/h5,7H,2-4H2,1H3,(H,8,9)	0.501	20.968	76	0.833	34	57.53	0.436	0
5-hydroxyindole acetaldehyde	1892-21-3	C05634	HMDB0004073	74688	50157	FDB023299		C10H9NO2	175.184	AFC000460	OBFAPCIUSYHFIE-UHFFFAOYSA-N	C1=CC2=C(C=C1O)C(=CN2)CC=O	InChI=1S/C10H9NO2/c12-4-3-7-6-11-10-2-1-8(13)5-9(7)10/h1-2,4-6,11,13H,3H2	-0.629	26.305	149	0.1	66	49.33	0.282	0
5-hydroxyindole thiazolidine carboxylate				134820455	124931	FDB030575		[C13H13N2O3S]-	277.321	AFC001548	DFSPELNJAJEWOM-UHFFFAOYSA-M	C1=CC2=C(C=C1O)C(=CN2)CC3NC(CS3)C(=O)[O-]	InChI=1S/C13H14N2O3S/c16-8-1-2-10-9(4-8)7(5-14-10)3-12-15-11(6-19-12)13(17)18/h1-2,4-5,11-12,14-16H,3,6H2,(H,17,18)/p-1	-1.063	39.054	327	0.308	102	109.72	0.396	0
5-Hydroxyindole-3-acetic acid	54-16-0	C05635	HMDB0000763	1826	27823	FDB001403		C10H9NO3	191.184	AFC001871	DUUGKQCEGZLZNO-UHFFFAOYSA-N	C1=CC2=C(C=C1O)C(=CN2)CC(=O)O	InChI=1S/C10H9NO3/c12-7-1-2-9-8(4-7)6(5-11-9)3-10(13)14/h1-2,4-5,11-12H,3H2,(H,13,14)	-0.676	27.107	162	0.1	72	69.56	0.364	0
5-hydroxyisourate	6960-30-1	C11821	HMDB0030097	250388	18072	FDB001616		C5H4N4O4	184.11	AFC000628	LTQYPAVLAYVKTK-UHFFFAOYSA-N	C12=NC(=O)NC1(C(=O)NC(=O)N2)O	InChI=1S/C5H4N4O4/c10-2-5(13)1(6-3(11)8-2)7-4(12)9-5/h13H,(H3,6,7,8,9,10,11,12)	-1.584	19.075	125	0.2	72	119.89	0.651	0
5-hydroxytryptophan	56-69-9	C01017	HMDB0000472	144	28171	FDB006231		C11H12N2O3	220.225	AFC001882	LDCYZAJDBXYCGN-UHFFFAOYSA-N	C1=CC2=C(C=C1O)C(=CN2)CC(C(=O)O)N	InChI=1S/C11H12N2O3/c12-9(11(15)16)3-6-5-13-10-2-1-7(14)4-8(6)10/h1-2,4-5,9,13-14H,3,12H2,(H,15,16)	-1.19	31.968	210	0.182	82	95.58	0.434	0
5-hydroxytryptophol	154-02-9		HMDB0001855	9061	89825	FDB022711		C10H11NO2	177.2	AFC000318	KQROHCSYOGBQGJ-UHFFFAOYSA-N	C1=CC2=C(C=C1O)C(=CN2)CCO	InChI=1S/C10H11NO2/c12-4-3-7-6-11-10-2-1-8(13)5-9(7)10/h1-2,5-6,11-13H,3-4H2	-0.599	27.639	149	0.2	66	52.49	0.296	0
5-methoxyflavanone	123931-32-8			147795				C16H14O3	254.281	AFC001886	YLLFUILNISGLHO-UHFFFAOYSA-N	COC1=CC=CC2=C1C(=O)CC(C3=CC=CC=C3)O2	InChI=1S/C16H14O3/c1-18-13-8-5-9-14-16(13)12(17)10-15(19-14)11-6-3-2-4-7-11/h2-9,15H,10H2,1H3	1.037	39.901	311	0.188	100	35.53	0.14	0
5-methoxyindole-3-acetic acid	3471-31-6	C05660	HMDB0004096	18986	28281	FDB023312		C11H11NO3	205.21	AFC001877	COCNDHOPIHDTHK-UHFFFAOYSA-N	COC1=CC2=C(C=C1)NC=C2CC(=O)O	InChI=1S/C11H11NO3/c1-15-8-2-3-10-9(5-8)7(6-12-10)4-11(13)14/h2-3,5-6,12H,4H2,1H3,(H,13,14)	-0.612	30.201	191	0.182	76	58.56	0.286	0
5-methylcytidine	2140-61-6		HMDB0000982	92918	20607	FDB022351		C10H15N3O5	257.244	AFC001887	ZAYHVCMSTBRABG-UHFFFAOYSA-N	CC1=CN([C@H]2[C@@H]([C@@H]([C@@H](CO)O2)O)O)C(=O)N=C1N	InChI=1S/C10H15N3O5/c1-4-2-13(10(17)12-8(4)11)9-7(16)6(15)5(3-14)18-9/h2,5-7,9,14-16H,3H2,1H3,(H2,11,12,17)	-1.949	34.912	255	0.6	94	128.61	0.5	0
5-methylcytosine	554-01-8	C02376	HMDB0002894	65040	27551	FDB004432		C5H7N3O	125.129	AFC001845	LRSASMSXMSNRBT-UHFFFAOYSA-N	CC1=C(N)NC(=O)N=C1	InChI=1S/C5H7N3O/c1-3-2-7-5(9)8-4(3)6/h2H,1H3,(H3,6,7,8,9)	-0.081	17.57	67	0.2	42	67.48	0.54	0
5-methyl-tetrahydrofolate	134-35-0	C00440	HMDB0001396	135483998	20612	FDB030576		C20H25N7O6	459.457	AFC001590	ZNOVTXRBGFNYRX-UHFFFAOYSA-N	CN1C(CNC2=CC=C(C=C2)C(=O)NC(CCC(=O)O)C(=O)O)CNC3=C1C(=O)NC(=N3)N	InChI=1S/C20H25N7O6/c1-27-12(9-23-16-15(27)18(31)26-20(21)25-16)8-22-11-4-2-10(3-5-11)17(30)24-13(19(32)33)6-7-14(28)29/h2-5,12-13,22H,6-9H2,1H3,(H,24,30)(H,28,29)(H,32,33)(H4,21,23,25,26,31)	-1.777	64.382	1015	0.35	168	198.48	0.432	2
5-methyltetrahydropteroyltri-L-glutamate		C04489	HMDB0012177	135398574	17614	FDB028831		C30H39N9O12	717.685	AFC001554	HVRNKDVLFAVCJF-UHFFFAOYSA-N	CN1C(CNC2=CC=C(C=C2)C(=O)NC(CCC(=O)NC(CCC(=O)NC(CCC(=O)O)C(=O)O)C(=O)O)C(=O)O)CNC3=C1C(=O)NC(=N3)N	InChI=1S/C30H39N9O12/c1-39-16(13-33-24-23(39)26(45)38-30(31)37-24)12-32-15-4-2-14(3-5-15)25(44)36-19(29(50)51)7-10-21(41)34-17(27(46)47)6-9-20(40)35-18(28(48)49)8-11-22(42)43/h2-5,16-19,32H,6-13H2,1H3,(H,34,41)(H,35,40)(H,36,44)(H,42,43)(H,46,47)(H,48,49)(H,50,51)(H4,31,33,37,38,45)	-3.123	98.329	2336	0.433	252	331.28	0.462	4
5-methylthioribulose-1-phosphate	86316-83-8	C04582	HMDB0001299	174549	28096	FDB022541		C6H13O7PS	260.203	AFC000602	CNSJRYUMVMWNMC-UHFFFAOYSA-N	CSCC(C(C(=O)COP(=O)(O)O)O)O	InChI=1S/C6H13O7PS/c1-15-3-5(8)6(9)4(7)2-13-14(10,11)12/h5-6,8-9H,2-3H2,1H3,(H2,10,11,12)	-1.84	31.372	191	0.833	66	159.4	0.613	0
5'-O-beta-D-glucosylpyridoxine		C03996		440188	17382			C14H21NO8	331.319	AFC001902	MDLTWTOQCHCLSZ-UHFFFAOYSA-N	CC1=C(C(=C(C=N1)CO[C@H]2[C@@H]([C@H]([C@@H]([C@@H](CO)O2)O)O)O)CO)O	InChI=1S/C14H21NO8/c1-6-10(18)8(3-16)7(2-15-6)5-22-14-13(21)12(20)11(19)9(4-17)23-14/h2,9,11-14,16-21H,3-5H2,1H3	-2.705	46.159	415	0.643	116	152.2	0.46	1
5-O-caffeoylshikimic acid	73263-62-4	C10434	HMDB0033999	5281762	2106	FDB012233		C16H16O8	336.294	AFC000952	QMPHZIPNNJOWQI-UHFFFAOYSA-N	C1=C(C=CC(=O)OC2CC(=CC(C2O)O)C(=O)O)C=C(C(=C1)O)O	InChI=1S/C16H16O8/c17-10-3-1-8(5-11(10)18)2-4-14(20)24-13-7-9(16(22)23)6-12(19)15(13)21/h1-6,12-13,15,17-19,21H,7H2,(H,22,23)	-0.26	45.245	510	0.25	120	144.52	0.43	0
5-pentyl-2(5H)-furanone	21963-26-8		HMDB0032442	89559		FDB009943	LMFA07040020	C9H14O2	154.207	AFC000469	MXZSZHJBUODOJK-UHFFFAOYSA-N	CCCCCC1C=CC(=O)O1	InChI=1S/C9H14O2/c1-2-3-4-5-8-6-7-9(10)11-8/h6-8H,2-5H2,1H3	2.658	26.779	134	0.667	48	26.3	0.171	0
5-phospho-alpha-D-ribose 1-diphosphate	7540-64-9	C00119	HMDB0000280	7339	17111	FDB021928		C5H13O14P3	390.07	AFC000274	PQGCEDQWHSBAJP-UHFFFAOYSA-N	C(C1C(C(C(O1)OP(=O)(O)OP(=O)(O)O)O)O)OP(=O)(O)O	InChI=1S/C5H13O14P3/c6-3-2(1-16-20(8,9)10)17-5(4(3)7)18-22(14,15)19-21(11,12)13/h2-7H,1H2,(H,14,15)(H2,8,9,10)(H2,11,12,13)	-4.434	39.586	367	1	114	259.17	0.665	2
5-phospho-beta-D-ribosyl-amine	6062-06-2	C03090	HMDB0001128	439905	37737	FDB022441		C5H12NO7P	229.125	AFC000702	SKCBPEVYGOQGJN-UHFFFAOYSA-N	C(C1C(C(C(N)O1)O)O)OP(=O)(O)O	InChI=1S/C5H12NO7P/c6-5-4(8)3(7)2(13-5)1-12-14(9,10)11/h2-5,7-8H,1,6H2,(H2,9,10,11)	-3.103	27.146	156	1	70	152.28	0.665	0
5'-phosphoribosyl-4-(N-succinocarboxamide)-5-aminoimidazole	3031-95-6	C04823	HMDB0000797	160666	18319	FDB022251		C13H19N4O12P	454.284	AFC000575	NAQGHJTUZRHGAC-UHFFFAOYSA-N	C(C(C(=O)O)NC(=O)C1=C(N)N(C=N1)C2C(C(C(COP(=O)(O)O)O2)O)O)C(=O)O	InChI=1S/C13H19N4O12P/c14-10-7(11(22)16-4(13(23)24)1-6(18)19)15-3-17(10)12-9(21)8(20)5(29-12)2-28-30(25,26)27/h3-5,8-9,12,20-21H,1-2,14H2,(H,16,22)(H,18,19)(H,23,24)(H2,25,26,27)	-4.851	53.203	699	0.538	154	271.58	0.598	2
5-phospho-ribosyl-glycineamide	10074-18-7	C03838	HMDB0002022	160913	18349	FDB022801		C7H15N2O8P	286.177	AFC000577	OBQMLSFOUZUIOB-UHFFFAOYSA-N	C(C(=O)NC1C(C(C(COP(=O)(O)O)O1)O)O)N	InChI=1S/C7H15N2O8P/c8-1-4(10)9-7-6(12)5(11)3(17-7)2-16-18(13,14)15/h3,5-7,11-12H,1-2,8H2,(H,9,10)(H2,13,14,15)	-3.829	34.568	267	0.857	88	181.38	0.634	1
5'-phosphoribosyl-N-formylglycineamide	349-34-8	C04376	HMDB0001308	90658924	147286	FDB030552		[C8H13N2O9P]2-	312.171	AFC001497	VDXLUNDMVKSKHO-UHFFFAOYSA-L	C(C(=O)NC1C(C(C(COP(=O)([O-])[O-])O1)O)O)NC=O	InChI=1S/C8H15N2O9P/c11-3-9-1-5(12)10-8-7(14)6(13)4(19-8)2-18-20(15,16)17/h3-4,6-8,13-14H,1-2H2,(H,9,11)(H,10,12)(H2,15,16,17)/p-2	-4.554	35.796	355	0.75	96	190.12	0.609	1
5-phosphoribosyl-N-formylglycineamidine	37721-04-3			9552078	147287			C8H16N3O8P	313.202	AFC001139	PMCOGCVKOAOZQM-UHFFFAOYSA-N	C(C(=NC1C(C(C(COP(=O)(O)O)O1)O)O)N)NC=O	InChI=1S/C8H16N3O8P/c9-5(1-10-3-12)11-8-7(14)6(13)4(19-8)2-18-20(15,16)17/h3-4,6-8,13-14H,1-2H2,(H2,9,11)(H,10,12)(H2,15,16,17)	-3.832	38.095	355	0.75	96	193.74	0.619	2
6,7-dimethyl-8-(1-D-ribityl)lumazine	5118-16-1	C04332	HMDB0003826	168989	17601	FDB023230		C13H18N4O6	326.306	AFC000596	SXDXRJZUAJBNFL-UHFFFAOYSA-N	CC1=C(C)N(CC(C(C(CO)O)O)O)C2=NC(=O)NC(=O)C2=N1	InChI=1S/C13H18N4O6/c1-5-6(2)17(3-7(19)10(21)8(20)4-18)11-9(14-5)12(22)16-13(23)15-11/h7-8,10,18-21H,3-4H2,1-2H3,(H,16,22,23)	-2.442	44.094	378	0.538	118	155.05	0.475	0
6-benzylaminopurine	1214-39-7	C11263	HMDB0039238	62389	29022	FDB018775		C12H11N5	225.25	AFC001883	NWBJYWHLCVSVIJ-UHFFFAOYSA-N	C1=CC=C(C=C1)CNC2=C3C(=NC=N2)N=CN3	InChI=1S/C12H11N5/c1-2-4-9(5-3-1)6-13-11-10-12(15-7-14-10)17-8-16-11/h1-5,7-8H,6H2,(H2,13,14,15,16,17)	0.181	33.955	279	0.083	88	61.14	0.272	0
6-hydroxymethyl-7,8-dihydropterin	3672-03-5	C01300		135398568	17083	FDB030597		C7H9N5O2	195.179	AFC001551	CQQNNQTXUGLUEV-UHFFFAOYSA-N	C1C(=NC2=C(N1)N=C(N)NC2=O)CO	InChI=1S/C7H9N5O2/c8-7-11-5-4(6(14)12-7)10-3(2-13)1-9-5/h13H,1-2H2,(H4,8,9,11,12,14)	-1.837	25.425	169	0.286	72	112.1	0.575	0
6-hydroxymethyl-dihydropterin diphosphate		C04807		135398611	57602			[C7H8N5O8P2]3-	352.115	AFC001562	FCQGJGLSOWZZON-UHFFFAOYSA-K	C1C(=NC2=C(N1)N=C(N)NC2=O)COP(=O)([O-])OP(=O)([O-])[O-]	InChI=1S/C7H11N5O8P2/c8-7-11-5-4(6(13)12-7)10-3(1-9-5)2-19-22(17,18)20-21(14,15)16/h1-2H2,(H,17,18)(H2,14,15,16)(H4,8,9,11,12,13)/p-3	-4.459	36.83	421	0.286	116	233.27	0.663	1
6-methoxy-3-methyl-2-all-trans-nonaprenyl-1,4-benzoquinol		C19859		50986193	84531			C53H82O3	767.218	AFC001429	GLNRSJSLTUCXTP-UHFFFAOYSA-N	CC(=CCCC(=CCCC(=CCCC(=CCCC(=CCCC(=CCCC(=CCCC(=CCCC(=CCC1=C(C(=CC(=C1C)O)OC)O)C)C)C)C)C)C)C)C)C	InChI=1S/C53H82O3/c1-40(2)21-13-22-41(3)23-14-24-42(4)25-15-26-43(5)27-16-28-44(6)29-17-30-45(7)31-18-32-46(8)33-19-34-47(9)35-20-36-48(10)37-38-50-49(11)51(54)39-52(56-12)53(50)55/h21,23,25,27,29,31,33,35,37,39,54-55H,13-20,22,24,26,28,30,32,34,36,38H2,1-12H3	16.655	150.363	3464	0.547	252	49.69	0.065	3
6-methoxy-3-methyl-2-all-trans-octaprenyl-1,4-benzoquinol				49852330	60656			C48H74O3	699.101	AFC001423	HDSGDGSLNMIMKU-UHFFFAOYSA-N	CC(=CCCC(=CCCC(=CCCC(=CCCC(=CCCC(=CCCC(=CCCC(=CCC1=C(C(=CC(=C1C)O)OC)O)C)C)C)C)C)C)C)C	InChI=1S/C48H74O3/c1-36(2)19-12-20-37(3)21-13-22-38(4)23-14-24-39(5)25-15-26-40(6)27-16-28-41(7)29-17-30-42(8)31-18-32-43(9)33-34-45-44(10)46(49)35-47(51-11)48(45)50/h19,21,23,25,27,29,31,33,35,49-50H,12-18,20,22,24,26,28,30,32,34H2,1-11H3	14.828	136.229	2845	0.542	230	49.69	0.071	3
6-methyl-5-hepten-2-one	110-93-0	C07287	HMDB0035915	9862	16310	FDB004925	LMFA12000039	C8H14O	126.196	AFC000323	UHEPJGULSIKKTP-UHFFFAOYSA-N	CC(=CCCC(=O)C)C	InChI=1S/C8H14O/c1-7(2)5-4-6-8(3)9/h5H,4,6H2,1-3H3	1.793	24.217	76	0.625	34	17.07	0.135	0
6-methylcoumarin	92-48-8		HMDB0032394	7092	563586	FDB009822		C10H8O2	160.17	AFC001855	FXFYOPQLGGEACP-UHFFFAOYSA-N	CC1=CC2=C(C=C1)OC(=O)C=C2	InChI=1S/C10H8O2/c1-7-2-4-9-8(6-7)3-5-10(11)12-9/h2-6H,1H3	1.584	24.538	130	0.1	62	26.3	0.164	0
6-methylhept-5-en-2-ol	1569-60-4	C07288	HMDB0030030	20745	15833	FDB001328	LMFA05000566	C8H16O	128.212	AFC000383	OHEFFKYYKJVVOX-UHFFFAOYSA-N	CC(=CCCC(C)O)C	InChI=1S/C8H16O/c1-7(2)5-4-6-8(3)9/h5,8-9H,4,6H2,1-3H3	2.262	25.551	76	0.75	34	20.23	0.158	0
6-methylmercaptopurine	50-66-8	C16614	HMDB0060412	5778	28279			C6H6N4S	166.205	AFC001859	UIJIQXGRFSPYQW-UHFFFAOYSA-N	CSC1=C2C(=NC=N1)N=CN2	InChI=1S/C6H6N4S/c1-11-6-4-5(8-2-7-4)9-3-10-6/h2-3H,1H3,(H,7,8,9,10)	0.075	21.861	97	0.167	56	74.41	0.448	0
6'-O-feruloylsucrose	118230-77-6			6443651				C22H30O14	518.466	AFC001102	XMBZZLUIFFOAHR-UHFFFAOYSA-N	COC1=CC(=CC=C1O)C=CC(=O)OCC2C(C(C(C(O2)OC3(CO)C(C(C(CO)O3)O)O)O)O)O	InChI=1S/C22H30O14/c1-32-12-6-10(2-4-11(12)25)3-5-15(26)33-8-14-16(27)18(29)19(30)21(34-14)36-22(9-24)20(31)17(28)13(7-23)35-22/h2-6,13-14,16-21,23-25,27-31H,7-9H2,1H3	-3.327	69.952	1055	0.591	186	225.06	0.434	3
6-O-feruloylsucrose								C22H30O14	518.466	AFC001102	XMBZZLUIFFOAHR-UHFFFAOYSA-N	COC1=CC(=CC=C1O)/C=C/C(=O)OC[C@@H]2[C@H]([C@@H]([C@H]([C@H](O2)O[C@@]3(CO)[C@H]([C@@H]([C@@H](CO)O3)O)O)O)O)O	InChI=1S/C22H30O14/c1-32-12-6-10(2-4-11(12)25)3-5-15(26)33-8-14-16(27)18(29)19(30)21(34-14)36-22(9-24)20(31)17(28)13(7-23)35-22/h2-6,13-14,16-21,23-25,27-31H,7-9H2,1H3	-3.327	69.952	1055	0.591	186	225.06	0.434	3
6-O-phosphonohexopyranose	3672-15-9	C02965	HMDB0001401	208	61667	FDB021818		C6H13O9P	260.136	AFC000029	NBSCHQHZLSJFNQ-UHFFFAOYSA-N	C(C1C(C(C(C(O)O1)O)O)O)OP(=O)(O)O	InChI=1S/C6H13O9P/c7-3-2(1-14-16(11,12)13)15-6(10)5(9)4(3)8/h2-10H,1H2,(H2,11,12,13)	-3.324	30.076	196	1	80	166.72	0.641	1
6-phospho-2-dehydro-D-gluconate		C01218		6602434	2229			C6H11O10P	274.12	AFC001108	ZKUSPPOKDDRMIU-UHFFFAOYSA-N	C(C(C(C(C(=O)C(=O)O)O)O)O)OP(=O)(O)O	InChI=1S/C6H11O10P/c7-2(1-16-17(13,14)15)3(8)4(9)5(10)6(11)12/h2-4,7-9H,1H2,(H,11,12)(H2,13,14,15)	-3.295	29.545	223	0.667	78	191.63	0.699	1
6-phospho-D-gluconate	921-62-0	C00345	HMDB0001316	91493	48928	FDB022550		C6H13O10P	276.135	AFC000472	BIRSGZKFKXLSJQ-UHFFFAOYSA-N	C(C(C(C(C(C(=O)O)O)O)O)O)OP(=O)(O)O	InChI=1S/C6H13O10P/c7-2(1-16-17(13,14)15)3(8)4(9)5(10)6(11)12/h2-5,7-10H,1H2,(H,11,12)(H2,13,14,15)	-3.542	30.878	223	0.833	78	194.79	0.706	1
6-phospho-D-glucono-1,5-lactone	2641-81-8	C01236	HMDB0001127	439452	16938	FDB022440		C6H11O9P	258.12	AFC000680	IJOJIVNDFQSGAB-UHFFFAOYSA-N	C(C1C(C(C(C(=O)O1)O)O)O)OP(=O)(O)O	InChI=1S/C6H11O9P/c7-3-2(1-14-16(11,12)13)15-6(10)5(9)4(3)8/h2-5,7-9H,1H2,(H2,11,12,13)	-2.933	28.743	196	0.833	80	163.56	0.634	0
6-prenylnaringenin	68236-13-5	C09832	HMDB0037247	155094	27566	FDB016258	LMPK12140277	C20H20O5	340.371	AFC001904	YHWNASRGLKJRJJ-UHFFFAOYSA-N	CC(=CCC1=C(C=C2C(=C1O)C(=O)C[C@@H](C3=CC=C(C=C3)O)O2)O)C	InChI=1S/C20H20O5/c1-11(2)3-8-14-15(22)9-18-19(20(14)24)16(23)10-17(25-18)12-4-6-13(21)7-5-12/h3-7,9,17,21-22,24H,8,10H2,1-2H3	1.663	52.546	541	0.25	132	86.99	0.256	0
7,2'-dihydroxy-4'-methoxy-isoflavanol		C16187		25202196	72646			C16H16O5	288.296	AFC001316	YZBBUYKPTHDZHF-UHFFFAOYSA-N	COC1=CC=C(C2COC3=CC(=CC=C3C2O)O)C(=C1)O	InChI=1S/C16H16O5/c1-20-10-3-5-11(14(18)7-10)13-8-21-15-6-9(17)2-4-12(15)16(13)19/h2-7,13,16-19H,8H2,1H3	-0.44	42.839	401	0.25	112	79.15	0.275	0
7,8-diaminopelargonate				28145934	149469	FDB030615		[C9H21N2O2]+	189.276	AFC001367	KCEGBPIYGIWCDH-UHFFFAOYSA-O	CC(C(CCCCCC(=O)[O-])[NH3+])[NH3+]	InChI=1S/C9H20N2O2/c1-7(10)8(11)5-3-2-4-6-9(12)13/h7-8H,2-6,10-11H2,1H3,(H,12,13)/p+1	-2.364	33.647	171	0.889	52	95.41	0.504	0
7,8-dihydro-D-neopterin	6917-20-0	C04874	HMDB0002275	135402024	17001	FDB030616		C9H13N5O4	255.231	AFC001584	YQIFAMYNGGOTFB-UHFFFAOYSA-N	C1C(=NC2=C(N1)N=C(N)NC2=O)C(C(CO)O)O	InChI=1S/C9H13N5O4/c10-9-13-7-5(8(18)14-9)12-3(1-11-7)6(17)4(16)2-15/h4,6,15-17H,1-2H2,(H4,10,11,13,14,18)	-2.858	33.216	277	0.444	92	152.56	0.598	1
7,8-dihydro-D-neopterin 2',3'-cyclic phosphate(1-)		C20567		135911931	58854			[C9H11N5O6P]-	316.188	AFC001595	QXDMVWOCXHMTPE-UHFFFAOYSA-M	C1C(=NC2=C(N1)N=C(N)NC2=O)C(C3COP(=O)([O-])O3)O	InChI=1S/C9H12N5O6P/c10-9-13-7-5(8(16)14-9)12-3(1-11-7)6(15)4-2-19-21(17,18)20-4/h4,6,15H,1-2H2,(H,17,18)(H4,10,11,13,14,16)/p-1	-3.236	37.117	382	0.444	116	180.5	0.571	1
7,8-dihydrofolate monoglutamate	4033-27-6	C00415	HMDB0001056	135398603	57451	FDB030617		[C19H19N7O6]2-	441.398	AFC001559	OZRNSSUDZOLUSN-UHFFFAOYSA-L	C1=C(C=CC(=C1)NCC2=NC3=C(NC2)N=C(N)NC3=O)C(=O)NC(CCC(=O)[O-])C(=O)[O-]	InChI=1S/C19H21N7O6/c20-19-25-15-14(17(30)26-19)23-11(8-22-15)7-21-10-3-1-9(2-4-10)16(29)24-12(18(31)32)5-6-13(27)28/h1-4,12,21H,5-8H2,(H,24,29)(H,27,28)(H,31,32)(H4,20,22,25,26,30)/p-2	-3.304	58.621	986	0.263	162	213.26	0.483	1
7,8-dihydroneopterin 3'-phosphate		C05925	HMDB0006824	135398608	48954	FDB024104		C9H14N5O7P	335.211	AFC001560	PLSQMGZYOGSOCE-UHFFFAOYSA-N	C1C(=NC2=C(N1)N=C(N)NC2=O)C(C(COP(=O)(O)O)O)O	InChI=1S/C9H14N5O7P/c10-9-13-7-5(8(17)14-9)12-3(1-11-7)6(16)4(15)2-21-22(18,19)20/h4,6,15-16H,1-2H2,(H2,18,19,20)(H4,10,11,13,14,17)	-3.668	39.919	415	0.444	114	208.9	0.623	2
7,8-dihydroneopterin triphosphate	20574-65-6	C04895	HMDB0000980	135398610	18372	FDB030620		C9H16N5O13P3	495.171	AFC001561	DGGUVLXVLHAAGT-UHFFFAOYSA-N	C1C(=NC2=C(N1)N=C(N)NC2=O)C(C(COP(=O)(O)OP(=O)(O)OP(=O)(O)O)O)O	InChI=1S/C9H16N5O13P3/c10-9-13-7-5(8(17)14-9)12-3(1-11-7)6(16)4(15)2-25-29(21,22)27-30(23,24)26-28(18,19)20/h4,6,15-16H,1-2H2,(H,21,22)(H,23,24)(H2,18,19,20)(H4,10,11,13,14,17)	-5.289	53.325	759	0.444	158	321.58	0.65	2
7,8-dihydropteroate	2134-76-1	C00921	HMDB0001412	135398662	4581	FDB030621		C14H14N6O3	314.3	AFC001580	WBFYVDCHGVNRBH-UHFFFAOYSA-N	C1=C(C=CC(=C1)NCC2=NC3=C(NC2)N=C(N)NC3=O)C(=O)O	InChI=1S/C14H14N6O3/c15-14-19-11-10(12(21)20-14)18-9(6-17-11)5-16-8-3-1-7(2-4-8)13(22)23/h1-4,16H,5-6H2,(H,22,23)(H4,15,17,19,20,21)	-1.276	42.981	533	0.143	120	141.2	0.45	0
7,9,9‚Äô-tri-cis-neurosporene	10467-46-6	C19759		25244751	62463	FDB030622		C40H58	538.89	AFC000910	ATCICVFRSJQYDV-UHFFFAOYSA-N	CC(=CCCC(=CC=CC(=CC=CC(=CC=CC=C(C)C=CC=C(C)CCC=C(C)CCC=C(C)C)C)C)C)C	InChI=1S/C40H58/c1-33(2)19-13-23-37(7)27-17-31-39(9)29-15-25-35(5)21-11-12-22-36(6)26-16-30-40(10)32-18-28-38(8)24-14-20-34(3)4/h11-12,15-17,19-22,25-31H,13-14,18,23-24,32H2,1-10H3	13.206	109.074	1834	0.4	170	0	0	3
71-hydroxychlorophyll a		C18151		90657665	83377	FDB030629		[C55H72N4O6]2-	885.185	AFC001415	WGXKECFZDNMJGX-UHFFFAOYSA-M	C=CC1=C2C=C3C(=C(CC)C(=N3)C=C4C(=C5C(=C(C(C5=O)C(=O)OC)C6=NC(=CC(=C1C)[N-]2)C(C)C6CCC(=O)OCC=C(C)CCCC(C)CCCC(C)CCCC(C)C)[N-]4)C)CO	InChI=1S/C55H73N4O6/c1-12-38-35(8)42-27-43-36(9)40(23-24-48(61)65-26-25-34(7)22-16-21-33(6)20-15-19-32(5)18-14-17-31(3)4)52(58-43)50-51(55(63)64-11)54(62)49-37(10)44(59-53(49)50)28-46-39(13-2)41(30-60)47(57-46)29-45(38)56-42/h12,25,27-29,31-33,36,40,51,60H,1,13-24,26,30H2,2-11H3,(H-,56,57,58,59,62)/q-1/p-1	10.418	154.021	3364	0.545	340	114.62	0.13	3
71-hydroxychlorophyllide a		C16540		122706035	48396	FDB030630		[C35H34N4O6]2-	606.669	AFC001413	RPARXUCBVGFRKT-UHFFFAOYSA-L	C=CC1=C2C=C3C(=C(CC)C(=N3)C=C4C(=C5C(=C([C@H](C5=O)C(=O)OC)C6=NC(=CC(=C1C)[N-]2)[C@@H](C)[C@@H]6CCC(=O)O)[N-]4)C)CO	InChI=1S/C35H36N4O6/c1-7-18-15(3)22-11-23-16(4)20(9-10-28(41)42)32(38-23)30-31(35(44)45-6)34(43)29-17(5)24(39-33(29)30)12-26-19(8-2)21(14-40)27(37-26)13-25(18)36-22/h7,11-13,16,20,31,40H,1,8-10,14H2,2-6H3,(H3,36,37,38,39,41,42,43)/p-2	2.472	93.483	1119	0.343	252	125.62	0.207	1
7-cis-lycopene				101118616				C40H56	536.874	AFC001156	OAIJSZIZWZSQBC-UHFFFAOYSA-N	CC(=CCCC(=CC=CC(=CC=CC(=CC=CC=C(C)C=CC=C(C)C=CC=C(C)CCC=C(C)C)C)C)C)C	InChI=1S/C40H56/c1-33(2)19-13-23-37(7)27-17-31-39(9)29-15-25-35(5)21-11-12-22-36(6)26-16-30-40(10)32-18-28-38(8)24-14-20-34(3)4/h11-12,15-22,25-32H,13-14,23-24H2,1-10H3	12.761	107.74	1834	0.35	170	0	0	3
7-deaza-7-aminomethyl-guanine		C16675	HMDB0011690	135398563	45126	FDB028377		C7H9N5O	179.18	AFC001549	MEYMBLGOKYDGLZ-UHFFFAOYSA-N	C(C1=CNC2=C1C(=O)NC(=N2)N)N	InChI=1S/C7H9N5O/c8-1-3-2-10-5-4(3)6(13)12-7(9)11-5/h2H,1,8H2,(H4,9,10,11,12,13)	-2.03	24.623	138	0.143	68	105.53	0.589	0
7-dehydrocholesterol	434-16-2	C01164	HMDB0000032	439423	17759	FDB021882	LMST01010069	C27H44O	384.639	AFC000675	UCTLRSWJYQTBFZ-UHFFFAOYSA-N	CC(C)CCCC(C)C1CCC2C3=CC=C4CC(CCC4(C)C3CCC12C)O	InChI=1S/C27H44O/c1-18(2)7-6-8-19(3)23-11-12-24-22-10-9-20-17-21(28)13-15-26(20,4)25(22)14-16-27(23,24)5/h9-10,18-19,21,23-25,28H,6-8,11-17H2,1-5H3	7.126	77.661	669	0.852	158	20.23	0.053	1
7-dehydrodesmosterol	1715-86-2	C05107	HMDB0003896	440558	27910	FDB030623	LMST01010121	C27H42O	382.623	AFC000716	RUSSPKPUXDSHNC-UHFFFAOYSA-N	CC(=CCCC(C)C1CCC2C3=CC=C4CC(CCC4(C)C3CCC12C)O)C	InChI=1S/C27H42O/c1-18(2)7-6-8-19(3)23-11-12-24-22-10-9-20-17-21(28)13-15-26(20,4)25(22)14-16-27(23,24)5/h7,9-10,19,21,23-25,28H,6,8,11-17H2,1-5H3	6.876	76.327	669	0.778	158	20.23	0.053	1
7-keto-8-aminopelargonate		C01092	HMDB0240687	36688192	149468	FDB016934	LMFA01060168	C9H17NO3	187.237	AFC001368	GUAHPAJOXVYFON-UHFFFAOYSA-N	CC(C(=O)CCCCCC(=O)[O-])[NH3+]	InChI=1S/C9H17NO3/c1-7(10)8(11)5-3-2-4-6-9(12)13/h7H,2-6,10H2,1H3,(H,12,13)	-1.109	30.681	171	0.778	52	84.84	0.453	0
8'-(3,4-dihydroxy-5-alkenyl)phenyl-3-[9'E,11'E-pentadecatrienyl]catechol				91820417				C42H58O4	626.909	AFC001506	RRISDBXWLOLICW-UHFFFAOYSA-N	CC=CC=CC=CCCCCCCCCC1=C(C(=CC(=C1)C(C=CC=CC=CC)CCCCCCCC2=CC=CC(=C2O)O)O)O	InChI=1S/C42H58O4/c1-3-5-7-9-10-11-12-13-14-15-16-19-25-30-37-33-38(34-40(44)42(37)46)35(27-22-18-8-6-4-2)28-23-20-17-21-24-29-36-31-26-32-39(43)41(36)45/h3-11,18,22,26-27,31-35,43-46H,12-17,19-21,23-25,28-30H2,1-2H3	10.967	115.802	2042	0.429	206	80.92	0.129	3
8'-hydroxyabscisate		C15514		25245404	58490	FDB030631		[C15H19O5]-	279.309	AFC001350	AVFORCKFTWHFAR-UHFFFAOYSA-M	CC(=CC(=O)[O-])C=CC1(C(=CC(=O)CC1(C)CO)C)O	InChI=1S/C15H20O5/c1-10(6-13(18)19)4-5-15(20)11(2)7-12(17)8-14(15,3)9-16/h4-7,16,20H,8-9H2,1-3H3,(H,18,19)/p-1	0.228	43.079	304	0.467	100	97.66	0.35	0
8-methylnonenoate	59320-77-3	C18202	HMDB0012183	5365959	81581	FDB028836	LMFA01030994	C10H18O2	170.249	AFC001030	OCALSPDXYQHUHA-UHFFFAOYSA-N	CC(C)C=CCCCCC(=O)O	InChI=1S/C10H18O2/c1-9(2)7-5-3-4-6-8-10(11)12/h5,7,9H,3-4,6,8H2,1-2H3,(H,11,12)	2.981	31.206	156	0.7	46	37.3	0.219	0
8-oxo-7,8-dihydro-2'-GTP	88847-89-6	C19967	HMDB0003333	135440064	40304	FDB023145		C10H13N5O5	283.241	AFC001586	HCAJQHYUCKICQH-UHFFFAOYSA-N	C1C(C(CO)OC1N2C3=C(C(=O)NC(=N3)N)NC2=O)O	InChI=1S/C10H13N5O5/c11-9-13-7-6(8(18)14-9)12-10(19)15(7)5-1-3(17)4(2-16)20-5/h3-5,16-17H,1-2H2,(H,12,19)(H3,11,13,14,18)	-2.381	35.778	305	0.5	110	149.51	0.528	0
8-oxo-dGTP	139307-94-1	C19967	HMDB0011615	135398565	63220	FDB028320		C10H16N5O14P3	523.181	AFC001550	BUZOGVVQWCXXDP-UHFFFAOYSA-N	C1C(C(COP(=O)(O)OP(=O)(O)OP(=O)(O)O)OC1N2C3=C(C(=O)NC(=N3)N)NC2=O)O	InChI=1S/C10H16N5O14P3/c11-9-13-7-6(8(17)14-9)12-10(18)15(7)5-1-3(16)4(27-5)2-26-31(22,23)29-32(24,25)28-30(19,20)21/h3-5,16H,1-2H2,(H,12,18)(H,22,23)(H,24,25)(H2,19,20,21)(H3,11,13,14,17)	-4.812	55.887	801	0.5	176	318.53	0.609	3
8-phospho-3-deoxy-D-manno-oct-2-ulosonic acid		C04478		15942880	18069			C8H15O11P	318.172	AFC001237	RTNBXJBOAIDPME-UHFFFAOYSA-N	C(C(C(C(C(COP(=O)(O)O)O)O)O)O)C(=O)C(=O)O	InChI=1S/C8H15O11P/c9-3(1-4(10)8(14)15)6(12)7(13)5(11)2-19-20(16,17)18/h3,5-7,9,11-13H,1-2H2,(H,14,15)(H2,16,17,18)	-3.771	36.534	320	0.75	92	211.86	0.666	2
9,10-12,13-diepoxyoctadecanoate	3012-69-9	C14836		18172	34500			C18H32O4	312.445	AFC000375	LAIUZQCFIABNDP-UHFFFAOYSA-N	CCCCCC1C(CC2C(CCCCCCCC(=O)O)O2)O1	InChI=1S/C18H32O4/c1-2-3-7-10-14-16(21-14)13-17-15(22-17)11-8-5-4-6-9-12-18(19)20/h14-17H,2-13H2,1H3,(H,19,20)	4.282	56.225	611	0.944	104	62.36	0.2	1
9,10-dihydroxyoctadeca-12,15-dienoate			HMDB0010221	52940106	88440	FDB027374	LMFA02000045	[C18H31O4]-	311.437	AFC001434	QRHSEDZBZMZPOA-UHFFFAOYSA-M	CCC=CCC=CCC(C(CCCCCCCC(=O)[O-])O)O	InChI=1S/C18H32O4/c1-2-3-4-5-7-10-13-16(19)17(20)14-11-8-6-9-12-15-18(21)22/h3-4,7,10,16-17,19-20H,2,5-6,8-9,11-15H2,1H3,(H,21,22)/p-1	3.509	55.559	561	0.722	88	80.59	0.259	1
9,10-epoxyoctadeca-12,15-dienoate			HMDB0010220	52940134	88441	FDB003106	LMFA02000039	[C18H29O3]-	293.422	AFC001435	JTEGNNHWOIJBJZ-UHFFFAOYSA-M	CCC=CCC=CCC1C(CCCCCCCC(=O)[O-])O1	InChI=1S/C18H30O3/c1-2-3-4-5-7-10-13-16-17(21-16)14-11-8-6-9-12-15-18(19)20/h3-4,7,10,16-17H,2,5-6,8-9,11-15H2,1H3,(H,19,20)/p-1	4.276	53.423	560	0.722	90	52.66	0.18	2
9,10-epoxystearate	2443-39-2	C19418		19746553	85195		LMFA02000326	[C18H33O3]-	297.454	AFC001251	IMYZYCNQZDBZBQ-UHFFFAOYSA-M	CCCCCCCCC1C(CCCCCCCC(=O)[O-])O1	InChI=1S/C18H34O3/c1-2-3-4-5-7-10-13-16-17(21-16)14-11-8-6-9-12-15-18(19)20/h16-17H,2-15H2,1H3,(H,19,20)/p-1	5.165	56.09	560	0.944	90	52.66	0.177	2
9,12-octadecadienoyl chloride, (Z,Z)-	7459-33-8			98987				C18H31ClO	298.892	AFC000498	FBWMYSQUTZRHAT-UHFFFAOYSA-N	CCCCCC=CCC=CCCCCCCCC(=O)Cl	InChI=1S/C18H31ClO/c1-2-3-4-5-6-7-8-9-10-11-12-13-14-15-16-17-18(19)20/h6-7,9-10H,2-5,8,11-17H2,1H3	6.993	55.333	521	0.722	76	17.07	0.057	2
9,15,9'-tri-cis-zeta-carotene		C19764		24755586	48717		LMPR01070296	C40H60	540.906	AFC000909	BIWLELKAFXRPDE-UHFFFAOYSA-N	CC(=CCCC(=CCCC(=CC=CC(=CC=CC=C(C)C=CC=C(C)CCC=C(C)CCC=C(C)C)C)C)C)C	InChI=1S/C40H60/c1-33(2)19-13-23-37(7)27-17-31-39(9)29-15-25-35(5)21-11-12-22-36(6)26-16-30-40(10)32-18-28-38(8)24-14-20-34(3)4/h11-12,15-16,19-22,25-30H,13-14,17-18,23-24,31-32H2,1-10H3	13.651	110.408	1834	0.45	170	0	0	3
9,17-octadecadiene-12,14-diyne-1,11,16-triol	211238-60-7			71307306				C18H26O3	290.398	AFC001895	MLGPZCOVWKAPPH-UHFFFAOYSA-N	C=CC(C#CC#CC(/C=C/CCCCCCCCO)O)O	InChI=1S/C18H26O3/c1-2-17(20)13-10-11-15-18(21)14-9-7-5-3-4-6-8-12-16-19/h2,9,14,17-21H,1,3-8,12,16H2	3.944	51.423	542	0.556	82	60.69	0.209	0
9,9'-di-cis-zeta-carotene	72746-33-9	C15857	HMDB0003063	6440490	48716	FDB018595	LMPR01070295	C40H60	540.906	AFC000909	BIWLELKAFXRPDE-UHFFFAOYSA-N	CC(=CCCC(=CCCC(=CC=CC(=CC=CC=C(C)C=CC=C(C)CCC=C(C)CCC=C(C)C)C)C)C)C	InChI=1S/C40H60/c1-33(2)19-13-23-37(7)27-17-31-39(9)29-15-25-35(5)21-11-12-22-36(6)26-16-30-40(10)32-18-28-38(8)24-14-20-34(3)4/h11-12,15-16,19-22,25-30H,13-14,17-18,23-24,31-32H2,1-10H3	13.651	110.408	1834	0.45	170	0	0	3
9'-cis-neoxanthin	14660-91-4	C13431	HMDB0003020	5282217	35306	FDB019089	LMPR01070291	C40H56O4	600.872	AFC000935	PGYAYSRVSAJXTE-UHFFFAOYSA-N	CC(=CC=CC=C(C)C=CC=C(C)C=CC12C(C)(C)CC(CC1(C)O2)O)C=CC=C(C)C=C=C3C(C)(C)CC(CC3(C)O)O	InChI=1S/C40H56O4/c1-29(17-13-19-31(3)21-22-35-36(5,6)25-33(41)27-38(35,9)43)15-11-12-16-30(2)18-14-20-32(4)23-24-40-37(7,8)26-34(42)28-39(40,10)44-40/h11-21,23-24,33-34,41-43H,25-28H2,1-10H3	7.08	110.948	1974	0.525	232	73.22	0.122	2
9-cis-violaxanthin		C13433		5282218	35305	FDB007098	LMPR01070284	C40H56O4	600.872	AFC000792	SZCBXWMUOPQSOX-UHFFFAOYSA-N	CC(=CC=CC=C(C)C=CC=C(C)C=CC12C(C)(C)CC(CC1(C)O2)O)C=CC=C(C)C=CC34C(C)(C)CC(CC3(C)O4)O	InChI=1S/C40H56O4/c1-29(17-13-19-31(3)21-23-39-35(5,6)25-33(41)27-37(39,9)43-39)15-11-12-16-30(2)18-14-20-32(4)22-24-40-36(7,8)26-34(42)28-38(40,10)44-40/h11-24,33-34,41-42H,25-28H2,1-10H3	7.001	110.948	2020	0.55	242	65.52	0.109	2
9-HOTrE		C16326		6439873	80447		LMFA02000024	C18H30O3	294.43	AFC001896	RIGGEAZDTKMXSI-UHFFFAOYSA-N	CC/C=C\C/C=C\C=C\C(CCCCCCCC(=O)O)O	InChI=1S/C18H30O3/c1-2-3-4-5-6-8-11-14-17(19)15-12-9-7-10-13-16-18(20)21/h3-4,6,8,11,14,17,19H,2,5,7,9-10,12-13,15-16H2,1H3,(H,20,21)	4.844	54.09	540	0.611	82	57.53	0.196	2
9-ribosyl-trans-zeatin 5'-monophosphate		C16430		11561034	71719	FDB031216		C15H22N5O8P	431.338	AFC001165	IRILMCCKFANGJQ-UHFFFAOYSA-N	CC(=CCNC1=NC=NC2=C1N=CN2C3C(C(C(COP(=O)(O)O)O3)O)O)CO	InChI=1S/C15H22N5O8P/c1-8(4-21)2-3-16-13-10-14(18-6-17-13)20(7-19-10)15-12(23)11(22)9(28-15)5-27-29(24,25)26/h2,6-7,9,11-12,15,21-23H,3-5H2,1H3,(H,16,17,18)(H2,24,25,26)	-3.005	56.615	723	0.533	152	198.84	0.461	2
abscisic acid	21293-29-8	C06082	HMDB0035140	5375200	62426	FDB014933	LMPR0103050001	C15H20O4	264.317	AFC001038	JLIDBLDQVAYHNE-UHFFFAOYSA-N	CC(=CC(=O)O)C=CC1(C(=CC(=O)CC1(C)C)C)O	InChI=1S/C15H20O4/c1-10(7-13(17)18)5-6-15(19)11(2)8-12(16)9-14(15,3)4/h5-8,19H,9H2,1-4H3,(H,17,18)	1.996	42.944	287	0.467	96	74.6	0.282	0
abscisic aldehyde		C13455		5282224	31157		LMPR0103050004	C15H20O3	248.318	AFC000964	RIKWDZWVHUIUAM-UHFFFAOYSA-N	CC(=CC=O)C=CC1(C(=CC(=O)CC1(C)C)C)O	InChI=1S/C15H20O3/c1-11(6-8-16)5-7-15(18)12(2)9-13(17)10-14(15,3)4/h5-9,18H,10H2,1-4H3	2.044	42.142	268	0.467	90	54.37	0.219	0
acetanilide	103-84-4	C07565	HMDB0001250	904	28884	FDB022512		C8H9NO	135.163	AFC001842	FZERHIULMFGESH-UHFFFAOYSA-N	CC(=O)NC1=CC=CC=C1	InChI=1S/C8H9NO/c1-7(10)9-8-5-3-2-4-6-8/h2-6H,1H3,(H,9,10)	0.228	21.983	92	0.125	44	29.1	0.215	0
acetic acid, 6-morpholin-4-yl-9-oxobicyclo[3.3.1]non-3-yl ester				580937				C15H23NO4	281.348	AFC000801	JFZYRJLPFHXQMT-UHFFFAOYSA-N	CC(=O)OC1CC2CCC(C(C1)C2=O)N3CCOCC3	InChI=1S/C15H23NO4/c1-10(17)20-12-8-11-2-3-14(13(9-12)15(11)18)16-4-6-19-7-5-16/h11-14H,2-9H2,1H3	0.59	46.044	326	0.867	106	55.84	0.199	0
acetoacetate	141-81-1	C00164	HMDB0000060	6971017	13705	FDB030645		[C4H5O3]-	101.081	AFC001120	WDJHALXBUFZDSR-UHFFFAOYSA-M	CC(=O)CC(=O)[O-]	InChI=1S/C4H6O3/c1-3(5)2-4(6)7/h2H2,1H3,(H,6,7)/p-1	-1.137	12.78	38	0.5	26	57.2	0.566	0
acetoacetyl-CoA	1420-36-6	C00332	HMDB0001484	92153	15345	FDB022648	LMFA07050030	C25H40N7O18P3S	851.61	AFC000480	OJFDKHTZOUZBOS-UHFFFAOYSA-N	CC(=O)CC(=O)SCCNC(=O)CCNC(=O)C(C(C)(C)COP(=O)(O)OP(=O)(O)OCC1C(C(C(N2C=NC3=C2N=CN=C3N)O1)O)OP(=O)(O)O)O	InChI=1S/C25H40N7O18P3S/c1-13(33)8-16(35)54-7-6-27-15(34)4-5-28-23(38)20(37)25(2,3)10-47-53(44,45)50-52(42,43)46-9-14-19(49-51(39,40)41)18(36)24(48-14)32-12-31-17-21(26)29-11-30-22(17)32/h11-12,14,18-20,24,36-37H,4-10H2,1-3H3,(H,27,34)(H,28,38)(H,42,43)(H,44,45)(H2,26,29,30)(H2,39,40,41)	-5.644	106.598	2511	0.64	278	432.15	0.508	4
acetoin	51555-24-9	C00466	HMDB0003243	179	15688	FDB011799		C4H8O2	88.1053	AFC000024	ROWKJAVDOGWPAT-UHFFFAOYSA-N	CC(C(=O)C)O	InChI=1S/C4H8O2/c1-3(5)4(2)6/h3,5H,1-2H3	-0.325	13.978	24	0.75	22	37.3	0.424	0
acetophenone	98-86-2	C07113	HMDB0033910	7410	27632	FDB012106		C8H8O	120.149	AFC000278	KWOLFJPFCHCOCG-UHFFFAOYSA-N	CC(=O)C1=CC=CC=C1	InChI=1S/C8H8O/c1-7(9)8-5-3-2-4-6-8/h2-6H,1H3	0.954	20.216	69	0.125	40	17.07	0.142	0
acetylornithine	6205-08-9	C00437	HMDB0003357	6992102	57805	FDB023152		C7H14N2O3	174.198	AFC001123	JRLGPAXAGHMNOL-UHFFFAOYSA-N	CC(=O)NC(CCC[NH3+])C(=O)[O-]	InChI=1S/C7H14N2O3/c1-5(10)9-6(7(11)12)3-2-4-8/h6H,2-4,8H2,1H3,(H,9,10)(H,11,12)	-2.797	26.261	118	0.714	48	96.87	0.556	0
adenine	73-24-5	C00147	HMDB0000034	190	16708	FDB012266		C5H5N5	135.127	AFC000026	GFFGJBXGBJISGV-UHFFFAOYSA-N	C1=NC2=NC=NC(=C2N1)N	InChI=1S/C5H5N5/c6-4-3-5(9-1-7-3)10-2-8-4/h1-2H,(H3,6,7,8,9,10)	-1.368	17.634	79	0	52	75.13	0.556	0
adenosine	58-61-7	C00212	HMDB0000050	60961	16335	FDB003554		C10H13N5O4	267.242	AFC000417	OIRDTQYFTABQOQ-UHFFFAOYSA-N	C(C1C(C(C(N2C=NC3=C2N=CN=C3N)O1)O)O)O	InChI=1S/C10H13N5O4/c11-8-5-9(13-2-12-8)15(3-14-5)10-7(18)6(17)4(1-16)19-10/h2-4,6-7,10,16-18H,1H2,(H2,11,12,13)	-2.776	34.976	288	0.5	104	136.26	0.51	0
adenosine diphosphate glucose	2140-58-1	C00498	HMDB0006557	42609821	57498	FDB030657		[C16H23N5O15P2]2-	587.327	AFC001371	WFPZSXYXPSUOPY-UHFFFAOYSA-L	C(C1C(C(C(C(O1)OP(=O)([O-])OP(=O)([O-])OCC2C(C(C(N3C=NC4=C3N=CN=C4N)O2)O)O)O)O)O)O	InChI=1S/C16H25N5O15P2/c17-13-7-14(19-3-18-13)21(4-20-7)15-11(26)9(24)6(33-15)2-32-37(28,29)36-38(30,31)35-16-12(27)10(25)8(23)5(1-22)34-16/h3-6,8-12,15-16,22-27H,1-2H2,(H,28,29)(H,30,31)(H2,17,18,19)/p-2	-6.811	68.286	1155	0.688	208	333.75	0.569	3
adenylyl-molybdopterin	220456-66-6	C19848	HMDB0059628	135926598	62728	FDB030654		C20H26N10O12P2S2	724.561	AFC001598	XJXFAXLUOKQPAQ-UHFFFAOYSA-N	C(C1C(C(C(N2C=NC3=C2N=CN=C3N)O1)O)O)OP(=O)(O)OP(=O)(O)OCC4C(=C(C5C(NC6=C(C(=O)NC(=N6)N)N5)O4)S)S	InChI=1S/C20H26N10O12P2S2/c21-14-8-16(24-3-23-14)30(4-25-8)19-11(32)10(31)5(41-19)1-38-43(34,35)42-44(36,37)39-2-6-12(45)13(46)7-18(40-6)27-15-9(26-7)17(33)29-20(22)28-15/h3-7,10-11,18-19,26,31-32,45-46H,1-2H2,(H,34,35)(H,36,37)(H2,21,23,24)(H4,22,27,28,29,33)	-5.319	86.221	1761	0.45	260	416.31	0.575	3
ADP ribose 1'',2''-cyclic phosphate	481-06-1	C19851	HMDB0011671	25245989	76596	FDB030655		[C15H19N5O16P3]3-	618.257	AFC001357	NPSPRYXPOGPCPM-UHFFFAOYSA-K	C(C1C(C(C(N2C=NC3=C2N=CN=C3N)O1)O)O)OP(=O)([O-])OP(=O)([O-])OCC4C(C5C(O4)OP(=O)([O-])O5)O	InChI=1S/C15H22N5O16P3/c16-12-7-13(18-3-17-12)20(4-19-7)14-10(23)8(21)5(32-14)1-30-37(24,25)36-38(26,27)31-2-6-9(22)11-15(33-6)35-39(28,29)34-11/h3-6,8-11,14-15,21-23H,1-2H2,(H,24,25)(H,26,27)(H,28,29)(H2,16,17,18)/p-3	-6.678	68.291	1334	0.667	222	341.46	0.553	2
agmatine	306-60-5	C00179	HMDB0001432	199	17431	FDB008310		C5H14N4	130.192	AFC000868	QYPPJABKJHAVHS-UHFFFAOYSA-N	C(CCN=C(N)N)CN	InChI=1S/C5H14N4/c6-3-1-2-4-9-5(7)8/h1-4,6H2,(H4,7,8,9)	-0.968	22.535	87	0.8	32	90.42	0.695	0
ajugol	52949-83-4			6325127				C15H24O9	348.346	AFC001081	VELYAQRXBJLJAK-UHFFFAOYSA-N	CC1(CC(C2C=COC(C21)OC3C(C(C(C(CO)O3)O)O)O)O)O	InChI=1S/C15H24O9/c1-15(21)4-7(17)6-2-3-22-13(9(6)15)24-14-12(20)11(19)10(18)8(5-16)23-14/h2-3,6-14,16-21H,4-5H2,1H3	-3.072	49.621	409	0.867	132	149.07	0.428	1
ajugose	512-72-1	C08238		441421	28554	FDB030659		C36H62O31	990.86	AFC000733	NCIHJQNXRKJRMJ-UHFFFAOYSA-N	C(C1C(C(C(C(OCC2C(C(C(C(OCC3C(C(C(C(OCC4C(C(C(C(OCC5C(C(C(C(O5)OC6(CO)C(C(C(CO)O6)O)O)O)O)O)O4)O)O)O)O3)O)O)O)O2)O)O)O)O1)O)O)O)O	InChI=1S/C36H62O31/c37-1-8-14(40)20(46)25(51)31(61-8)57-3-10-15(41)21(47)26(52)32(62-10)58-4-11-16(42)22(48)27(53)33(63-11)59-5-12-17(43)23(49)28(54)34(64-12)60-6-13-18(44)24(50)29(55)35(65-13)67-36(7-39)30(56)19(45)9(2-38)66-36/h8-35,37-56H,1-7H2	-11.298	129.563	3307	1	360	506.13	0.511	4
alanine	302-72-7	C01401	HMDB0062251	602	16449	FDB000557		C3H7NO2	89.0933	AFC000081	QNAYBMKLOCPYGJ-UHFFFAOYSA-N	CC(C(=O)O)N	InChI=1S/C3H7NO2/c1-2(4)3(5)6/h2H,4H2,1H3,(H,5,6)	-0.601	12.652	24	0.667	22	63.32	0.711	0
alanine glutamate	13187-90-1	C20958	HMDB0028686	128841	61565			C8H14N2O5	218.207	AFC000546	VYZAGTDAHUIRQA-UHFFFAOYSA-N	CC(C(=O)NC(CCC(=O)O)C(=O)O)N	InChI=1S/C8H14N2O5/c1-4(9)7(13)10-5(8(14)15)2-3-6(11)12/h4-5H,2-3,9H2,1H3,(H,10,13)(H,11,12)(H,14,15)	-1.273	29.625	170	0.625	64	129.72	0.595	0
aldehydo-D-galacturonate	685-73-4		HMDB0002545	1593918	12952	FDB001161		[C6H9O7]-	193.132	AFC000845	IAJILQKETJEXLJ-UHFFFAOYSA-M	C(=O)C(C(C(C(C(=O)[O-])O)O)O)O	InChI=1S/C6H10O7/c7-1-2(8)3(9)4(10)5(11)6(12)13/h1-5,8-11H,(H,12,13)/p-1	-3.153	22.175	127	0.667	56	138.12	0.716	0
aldehydo-D-glucuronate				5460126	142686			[C6H9O7]-	193.132	AFC000845	IAJILQKETJEXLJ-UHFFFAOYSA-M	C(=O)C(C(C(C(C(=O)[O-])O)O)O)O	InChI=1S/C6H10O7/c7-1-2(8)3(9)4(10)5(11)6(12)13/h1-5,8-11H,(H,12,13)/p-1	-3.153	22.175	127	0.667	56	138.12	0.716	0
aldehydo-D-mannose	3458-28-4		HMDB0062473	161658	37675			C6H12O6	180.156	AFC000509	GZCGUPFRVQAUEE-UHFFFAOYSA-N	C(=O)C(C(C(C(CO)O)O)O)O	InChI=1S/C6H12O6/c7-1-3(9)5(11)6(12)4(10)2-8/h1,3-6,8-12H,2H2	-2.684	23.374	114	0.833	50	118.22	0.657	0
allantoate	99-16-1	C00499	HMDB0001209	5287444	17536	FDB030673		[C4H7N4O4]-	175.123	AFC000987	NUCLJNSWZCHRKL-UHFFFAOYSA-M	C(C(=O)[O-])(NC(=O)N)NC(=O)N	InChI=1S/C4H8N4O4/c5-3(11)7-1(2(9)10)8-4(6)12/h1H,(H,9,10)(H3,5,7,11)(H3,6,8,12)/p-1	-2.662	19.316	101	0.25	50	150.37	0.859	0
allantoin	97-59-6	C01551	HMDB0000462	204	15676	FDB001613		C4H6N4O3	158.116	AFC000027	POJWUDADGALRAB-UHFFFAOYSA-N	C1(C(=O)NC(=O)N1)NC(=O)N	InChI=1S/C4H6N4O3/c5-3(10)6-1-2(9)8-4(11)7-1/h1H,(H3,5,6,10)(H2,7,8,9,11)	-1.765	17.847	100	0.25	52	113.32	0.717	0
allolactose	645-03-4		HMDB0038489	6454902	36229	FDB018317		C12H22O11	342.297	AFC000719	DLRVVLDZNNYCBX-UHFFFAOYSA-N	C(C1C(C(C(C(OCC2C(C(C(C(O)O2)O)O)O)O1)O)O)O)O	InChI=1S/C12H22O11/c13-1-3-5(14)8(17)10(19)12(23-3)21-2-4-6(15)7(16)9(18)11(20)22-4/h3-20H,1-2H2	-4.26	44.611	415	1	118	189.53	0.554	2
all-trans-geranyl-geranyl diphosphate	6699-20-3	C00353	HMDB0004486	5497105	58756	FDB023377		[C20H33O7P2]3-	447.42	AFC001075	OINNEUNVOZHBOX-UHFFFAOYSA-K	CC(=CCCC(=CCCC(=CCCC(=CCOP(=O)([O-])OP(=O)([O-])[O-])C)C)C)C	InChI=1S/C20H36O7P2/c1-17(2)9-6-10-18(3)11-7-12-19(4)13-8-14-20(5)15-16-26-29(24,25)27-28(21,22)23/h9,11,13,15H,6-8,10,12,14,16H2,1-5H3,(H,24,25)(H2,21,22,23)/p-3	3.965	70.078	868	0.6	130	141.4	0.316	1
all-trans-hexaprenyl diphosphate	481-06-1	C01230	HMDB0012188	5280413	53047	FDB028840	LMPR03030005	C30H52O7P2	586.678	AFC000878	NGFSMHKFTZROKJ-UHFFFAOYSA-N	CC(=CCCC(=CCCC(=CCCC(=CCCC(=CCCC(=CCOP(=O)(O)OP(=O)(O)O)C)C)C)C)C)C	InChI=1S/C30H52O7P2/c1-25(2)13-8-14-26(3)15-9-16-27(4)17-10-18-28(5)19-11-20-29(6)21-12-22-30(7)23-24-36-39(34,35)37-38(31,32)33/h13,15,17,19,21,23H,8-12,14,16,18,20,22,24H2,1-7H3,(H,34,35)(H2,31,32,33)	8.62	100.347	1638	0.6	174	132.91	0.227	3
all-trans-nonaprenyl diphosphate	60037-55-0	C04145		5280650	18144;53044	FDB030665	LMPR03030007	C45H76O7P2	791.03	AFC000903	IVLBHBFTRNVIAP-UHFFFAOYSA-N	CC(=CCCC(=CCCC(=CCCC(=CCCC(=CCCC(=CCCC(=CCCC(=CCCC(=CCOP(=O)(O)OP(=O)(O)O)C)C)C)C)C)C)C)C)C	InChI=1S/C45H76O7P2/c1-37(2)19-11-20-38(3)21-12-22-39(4)23-13-24-40(5)25-14-26-41(6)27-15-28-42(7)29-16-30-43(8)31-17-32-44(9)33-18-34-45(10)35-36-51-54(49,50)52-53(46,47)48/h19,21,23,25,27,29,31,33,35H,11-18,20,22,24,26,28,30,32,34,36H2,1-10H3,(H,49,50)(H2,46,47,48)	14.1	142.75	3243	0.6	240	132.91	0.168	3
all-trans-octaprenyl diphosphate	90-43-7	C04146	HMDB0001094	5280651	53045	FDB022423	LMPR01070226	C40H68O7P2	722.913	AFC000904	IKKLDISSULFFQO-UHFFFAOYSA-N	CC(=CCCC(=CCCC(=CCCC(=CCCC(=CCCC(=CCCC(=CCCC(=CCOP(=O)(O)OP(=O)(O)O)C)C)C)C)C)C)C)C	InChI=1S/C40H68O7P2/c1-33(2)17-10-18-34(3)19-11-20-35(4)21-12-22-36(5)23-13-24-37(6)25-14-26-38(7)27-15-28-39(8)29-16-30-40(9)31-32-46-49(44,45)47-48(41,42)43/h17,19,21,23,25,27,29,31H,10-16,18,20,22,24,26,28,30,32H2,1-9H3,(H,44,45)(H2,41,42,43)	12.273	128.616	2648	0.6	218	132.91	0.184	3
alpha-amino-beta-(1-imidazoyl)-propionic acid								C7H9N3O3	183.165	AFC001638	IGDOXQQHTMMUDA-UHFFFAOYSA-N	C1=CN(C=N1)C(=O)CC(C(=O)O)N	InChI=1S/C7H9N3O3/c8-5(7(12)13)3-6(11)10-2-1-9-4-10/h1-2,4-5H,3,8H2,(H,12,13)	-2.249	24.027	145	0.286	60	95.99	0.524	0
alpha-carotene	432-70-2	C05433	HMDB0003993	4369188	28425	FDB013716	LMPR01070258	C40H56	536.874	AFC000864	ANVAOWXLWRTKGA-UHFFFAOYSA-N	CC(=CC=CC=C(C)C=CC=C(C)C=CC1=C(C)CCCC1(C)C)C=CC=C(C)C=CC2C(=CCCC2(C)C)C	InChI=1S/C40H56/c1-31(19-13-21-33(3)25-27-37-35(5)23-15-29-39(37,7)8)17-11-12-18-32(2)20-14-22-34(4)26-28-38-36(6)24-16-30-40(38,9)10/h11-14,17-23,25-28,37H,15-16,24,29-30H2,1-10H3	11.804	107.74	1642	0.45	194	0	0	2
alpha-chamigrene	19912-83-5	C09635		442351	10220			C15H24	204.352	AFC000738	SIBCECUUMHIAAM-UHFFFAOYSA-N	CC1=CCC2(CC1)C(=CCCC2(C)C)C	InChI=1S/C15H24/c1-12-7-10-15(11-8-12)13(2)6-5-9-14(15,3)4/h6-7H,5,8-11H2,1-4H3	4.654	42.403	168	0.733	82	0	0	1
alpha-copaene	3856-25-5	C09639	HMDB0061851	19725	10221	FDB001522		C15H24	204.352	AFC000382	VLXDPFLIRFYIME-UHFFFAOYSA-N	CC(C)C1CCC2(C)C3CC=C(C)C2C13	InChI=1S/C15H24/c1-9(2)11-7-8-15(4)12-6-5-10(3)14(15)13(11)12/h5,9,11-14H,6-8H2,1-4H3	4.169	42.403	159	0.867	90	0	0	1
alpha-D-altropyranose	7282-80-6			7098663	155672			C6H12O6	180.156	AFC000214	WQZGKKKJIJFFOK-UHFFFAOYSA-N	C(C1C(C(C(C(O)O1)O)O)O)O	InChI=1S/C6H12O6/c7-1-2-3(8)4(9)5(10)6(11)12-2/h2-11H,1H2	-2.513	23.374	108	1	58	110.38	0.613	0
alpha-D-galactose	3646-73-9	C00984	HMDB0000143	439357	28061	FDB021787		C6H12O6	180.156	AFC000214	WQZGKKKJIJFFOK-UHFFFAOYSA-N	C(C1C(C(C(C(O)O1)O)O)O)O	InChI=1S/C6H12O6/c7-1-2-3(8)4(9)5(10)6(11)12-2/h2-11H,1H2	-2.513	23.374	108	1	58	110.38	0.613	0
alpha-D-galactose 1-phosphate	2255-14-3	C00446	HMDB0000645	123912	17973	FDB031262		C6H13O9P	260.136	AFC000437	HXXFSFRBOHSIMQ-UHFFFAOYSA-N	C(C1C(C(C(C(O1)OP(=O)(O)O)O)O)O)O	InChI=1S/C6H13O9P/c7-1-2-3(8)4(9)5(10)6(14-2)15-16(11,12)13/h2-10H,1H2,(H2,11,12,13)	-3.324	30.076	176	1	80	166.72	0.641	1
alpha-D-galacturonate	685-73-4	C00333	HMDB0002545	11883891	68837	FDB001161		[C6H9O7]-	193.132	AFC001172	AEMOLEFTQBMNLQ-UHFFFAOYSA-M	C1(C(C(C(=O)[O-])OC(C1O)O)O)O	InChI=1S/C6H10O7/c7-1-2(8)4(5(10)11)13-6(12)3(1)9/h1-4,6-9,12H,(H,10,11)/p-1	-2.982	22.175	119	0.833	64	130.28	0.675	0
alpha-D-glucose	492-62-6	C00267	HMDB0003345	79025	28102	FDB011829		C6H12O6	180.156	AFC000214	WQZGKKKJIJFFOK-UHFFFAOYSA-N	C(C1C(C(C(C(O)O1)O)O)O)O	InChI=1S/C6H12O6/c7-1-2-3(8)4(9)5(10)6(11)12-2/h2-11H,1H2	-2.513	23.374	108	1	58	110.38	0.613	0
alpha-D-glucose 1-phosphate	59-56-3	C00103	HMDB0001586	65533	29042	FDB021830		C6H13O9P	260.136	AFC000437	HXXFSFRBOHSIMQ-UHFFFAOYSA-N	C(C1C(C(C(C(O1)OP(=O)(O)O)O)O)O)O	InChI=1S/C6H13O9P/c7-1-2-3(8)4(9)5(10)6(14-2)15-16(11,12)13/h2-10H,1H2,(H2,11,12,13)	-3.324	30.076	176	1	80	166.72	0.641	1
alpha-D-glucose 6-phosphate	15209-11-7	C00668	HMDB0001401	439284	17665	FDB021818		C6H13O9P	260.136	AFC000029	NBSCHQHZLSJFNQ-UHFFFAOYSA-N	C(C1C(C(C(C(O)O1)O)O)O)OP(=O)(O)O	InChI=1S/C6H13O9P/c7-3-2(1-14-16(11,12)13)15-6(10)5(9)4(3)8/h2-10H,1H2,(H2,11,12,13)	-3.324	30.076	196	1	80	166.72	0.641	1
alpha-D-glucuronate	6556-12-3	C00191		11882235	42717			[C6H9O7]-	193.132	AFC001172	AEMOLEFTQBMNLQ-UHFFFAOYSA-M	C1(C(C(C(=O)[O-])OC(C1O)O)O)O	InChI=1S/C6H10O7/c7-1-2(8)4(5(10)11)13-6(12)3(1)9/h1-4,6-9,12H,(H,10,11)/p-1	-2.982	22.175	119	0.833	64	130.28	0.675	0
alpha-D-glucuronate 1-phosphate		C05385	HMDB0003976	25244365	57897	FDB023278		[C6H8O10P]3-	271.096	AFC001331	AIQDYKMWENWVQJ-UHFFFAOYSA-K	C1(C(C(C(=O)[O-])OC(C1O)OP(=O)([O-])[O-])O)O	InChI=1S/C6H11O10P/c7-1-2(8)4(5(10)11)15-6(3(1)9)16-17(12,13)14/h1-4,6-9H,(H,10,11)(H2,12,13,14)/p-3	-4.46	27.544	189	0.833	86	192.28	0.71	0
alpha-D-mannose	7296-15-3	C00936	HMDB0000169	185698	28729	FDB031267		C6H12O6	180.156	AFC000214	WQZGKKKJIJFFOK-UHFFFAOYSA-N	C(C1C(C(C(C(O)O1)O)O)O)O	InChI=1S/C6H12O6/c7-1-2-3(8)4(9)5(10)6(11)12-2/h2-11H,1H2	-2.513	23.374	108	1	58	110.38	0.613	0
alpha-D-mannose 1-phosphate	15978-07-1	C00636	HMDB0006330	439279	18205	FDB031268		C6H13O9P	260.136	AFC000437	HXXFSFRBOHSIMQ-UHFFFAOYSA-N	C(C1C(C(C(C(O1)OP(=O)(O)O)O)O)O)O	InChI=1S/C6H13O9P/c7-1-2-3(8)4(9)5(10)6(14-2)15-16(11,12)13/h2-10H,1H2,(H2,11,12,13)	-3.324	30.076	176	1	80	166.72	0.641	1
alpha-D-ribose-1-phosphate	14075-00-4	C00620	HMDB0001489	439236	16300	FDB022650		C5H11O8P	230.11	AFC000651	YXJDFQJKERBOBM-UHFFFAOYSA-N	C(C1C(C(C(O1)OP(=O)(O)O)O)O)O	InChI=1S/C5H11O8P/c6-1-2-3(7)4(8)5(12-2)13-14(9,10)11/h2-8H,1H2,(H2,9,10,11)	-2.813	26.181	147	1	70	146.49	0.637	0
alpha-D-xylopyranose	6763-34-4	C01394	HMDB0000098	6027	28518	FDB005944		C5H10O5	150.13	AFC000229	SRBFZHDQGSBBOR-UHFFFAOYSA-N	C1C(C(C(C(O)O1)O)O)O	InChI=1S/C5H10O5/c6-2-1-10-5(9)4(8)3(2)7/h2-9H,1H2	-2.003	19.478	76	1	48	90.15	0.601	0
alpha-humulene	6753-98-6	C09684	HMDB0036467	5281520	5768	FDB015360	LMPR0103110001	C15H24	204.352	AFC000945	FAMPSKZZVDUYOS-UHFFFAOYSA-N	CC1=CCCC(=CCC(C)(C)C=CC1)C	InChI=1S/C15H24/c1-13-7-5-8-14(2)10-12-15(3,4)11-6-9-13/h6-7,10-11H,5,8-9,12H2,1-4H3	5.035	42.403	166	0.6	70	0	0	1
alpha-ionone	127-41-3	C12286	HMDB0059883	5282108	32319	FDB014484		C13H20O	192.298	AFC000960	UZFLPKAIBPNNCA-UHFFFAOYSA-N	CC1=CCCC(C)(C)C1C=CC(=O)C	InChI=1S/C13H20O/c1-10-6-5-9-13(3,4)12(10)8-7-11(2)14/h6-8,12H,5,9H2,1-4H3	3.021	37.018	153	0.615	68	17.07	0.089	0
alpha-L-arabinofuranose	38029-69-5	C06115		445935	28772	FDB031274		C5H10O5	150.13	AFC000778	HMFHBZSHGGEWLO-UHFFFAOYSA-N	C(C1C(C(C(O)O1)O)O)O	InChI=1S/C5H10O5/c6-1-2-3(7)4(8)5(9)10-2/h2-9H,1H2	-2.003	19.478	75	1	48	90.15	0.601	0
alpha-L-fucose	6696-41-9	C20835	HMDB0000174	439554	42548	FDB020543		C6H12O5	164.157	AFC000688	SHZGCJCMOBCMKK-UHFFFAOYSA-N	CC1C(C(C(C(O)O1)O)O)O	InChI=1S/C6H12O5/c1-2-3(7)4(8)5(9)6(10)11-2/h2-10H,1H3	-1.625	22.572	89	1	54	90.15	0.549	0
alpha-L-galactose-1-phosphate				46173228	60465			C6H13O9P	260.136	AFC000437	HXXFSFRBOHSIMQ-UHFFFAOYSA-N	C(C1C(C(C(C(O1)OP(=O)(O)O)O)O)O)O	InChI=1S/C6H13O9P/c7-1-2-3(8)4(9)5(10)6(14-2)15-16(11,12)13/h2-10H,1H2,(H2,11,12,13)	-3.324	30.076	176	1	80	166.72	0.641	1
alpha-L-Rhamnose								C6H12O5	164.157	AFC000688	SHZGCJCMOBCMKK-UHFFFAOYSA-N	C[C@H]1[C@@H]([C@H]([C@H]([C@H](O)O1)O)O)O	InChI=1S/C6H12O5/c1-2-3(7)4(8)5(9)6(10)11-2/h2-10H,1H3	-1.625	22.572	89	1	54	90.15	0.549	0
alpha-maltose	9005-84-9	C00897	HMDB0037138	439341	18167	FDB016133		C12H22O11	342.297	AFC000244	GUBGYTABKSRVRQ-UHFFFAOYSA-N	C(C1C(C(C(C(O1)OC2C(CO)OC(C(C2O)O)O)O)O)O)O	InChI=1S/C12H22O11/c13-1-3-5(15)6(16)9(19)12(22-3)23-10-4(2-14)21-11(20)8(18)7(10)17/h3-20H,1-2H2	-4.26	44.611	372	1	118	189.53	0.554	2
alpha-N-acetylneuraminyl-(2->3)-beta-D-galactose-(1->3)-(alpha-N-acetylneuraminyl-(2->6))-N-acetyl-D-galactosaminyl-R		C04926			17850			C37H61N3O27	979.886	AFC000282	XODOXNRNKDRYKT-UHFFFAOYSA-N	CC(=O)NC1C(CC(C(=O)O)(OC1C(C(CO)CO)O)OC2C(C(CO)OC(C2O)OC3C(C(O)OC(COC4(CC(C(C(C(C(CO)O)O)O4)NC(=O)C)O)C(=O)O)C3O)NC(=O)C)O)O	InChI=1S/C37H61N3O27/c1-11(45)38-20-16(49)5-37(35(59)60,66-29(20)23(51)14(6-41)7-42)67-31-25(53)18(9-44)63-33(27(31)55)64-28-22(40-13(3)47)32(56)62-19(26(28)54)10-61-36(34(57)58)4-15(48)21(39-12(2)46)30(65-36)24(52)17(50)8-43/h14-33,41-44,48-56H,4-10H2,1-3H3,(H,38,45)(H,39,46)(H,40,47)(H,57,58)(H,59,60)	-9.745	130.748	2479	0.865	348	489.5	0.5	4
alpha-N-acetylneuraminyl-2,3-beta-D-galactosyl-1,4-N-acetyl-D-glucosaminyl-glycoprotein		C04907						C26H44N2O19	688.631	AFC000281	UKUXMGCGNFDUPX-UHFFFAOYSA-N	CC(=O)NC1C(CC(C(=O)O)(OC1C(C(CO)CO)O)OC2C(C(CO)OC(C2O)OC3C(CO)OC(C(C3O)NC(=O)C)O)O)O	InChI=1S/C26H44N2O19/c1-8(33)27-14-11(35)3-26(25(41)42,46-21(14)16(36)10(4-29)5-30)47-22-17(37)12(6-31)44-24(19(22)39)45-20-13(7-32)43-23(40)15(18(20)38)28-9(2)34/h10-24,29-32,35-40H,3-7H2,1-2H3,(H,27,33)(H,28,34)(H,41,42)	-7.123	92.537	1277	0.885	242	343.95	0.5	4
alpha-tocopherol	59-02-9	C02477	HMDB0001893	14985	22470	FDB000565	LMPR02020001	C29H50O2	430.707	AFC000368	GVJHHUAWPYXKBD-UHFFFAOYSA-N	CC(C)CCCC(C)CCCC(C)CCCC1(C)CCC2=C(C)C(=C(C)C(=C2O1)C)O	InChI=1S/C29H50O2/c1-20(2)12-9-13-21(3)14-10-15-22(4)16-11-18-29(8)19-17-26-25(7)27(30)23(5)24(6)28(26)31-29/h20-22,30H,9-19H2,1-8H3	9.052	85.984	945	0.793	154	29.46	0.068	2
alpha-tocotrienol	1721-51-3	C14153	HMDB0006327	5282347	33270	FDB002434	LMPR02020054	C29H44O2	424.66	AFC000967	RZFHLOLGZPDCHJ-UHFFFAOYSA-N	CC(=CCCC(=CCCC(=CCCC1(C)CCC2=C(C)C(=C(C)C(=C2O1)C)O)C)C)C	InChI=1S/C29H44O2/c1-20(2)12-9-13-21(3)14-10-15-22(4)16-11-18-29(8)19-17-26-25(7)27(30)23(5)24(6)28(26)31-29/h12,14,16,30H,9-11,13,15,17-19H2,1-8H3	8.302	81.983	945	0.586	154	29.46	0.069	1
alpha-zingiberene	495-60-3	C09750	HMDB0036164	92776	10115	FDB015017	LMPR0103060002	C15H24	204.352	AFC001161	KKOXKGNSUHTUBV-UHFFFAOYSA-N	CC(=CCCC(C)C1C=CC(=CC1)C)C	InChI=1S/C15H24/c1-12(2)6-5-7-14(4)15-10-8-13(3)9-11-15/h6,8-10,14-15H,5,7,11H2,1-4H3	5.081	42.403	225	0.6	68	0	0	1
anandamide	94421-68-8	C11695	HMDB0004080	5281969	2700	FDB023303	LMFA08040001	C22H37NO2	347.536	AFC000955	LGEQQWMQCRIYKG-UHFFFAOYSA-N	CCCCCC=CCC=CCC=CCC=CCCCC(=O)NCCO	InChI=1S/C22H37NO2/c1-2-3-4-5-6-7-8-9-10-11-12-13-14-15-16-17-18-19-22(25)23-20-21-24/h6-7,9-10,12-13,15-16,24H,2-5,8,11,14,17-21H2,1H3,(H,23,25)	5.478	66.095	833	0.591	96	49.33	0.142	2
anchusin	517-88-4	C10292	HMDB0030579	5208	140320	FDB002470		C16H16O5	288.296	AFC000209	NEZONWMXZKDMKF-UHFFFAOYSA-N	CC(=CCC(C1=CC(=O)C2=C(C(=CC=C2O)O)C1=O)O)C	InChI=1S/C16H16O5/c1-8(2)3-4-10(17)9-7-13(20)14-11(18)5-6-12(19)15(14)16(9)21/h3,5-7,10,17-19H,4H2,1-2H3	0.997	42.839	336	0.25	108	94.83	0.329	0
androst-4-en-3,17-dione	63-05-8	C00280	HMDB0000053	6128	16422	FDB030678	LMST02020007	C19H26O2	286.409	AFC000240	AEMFNILZOJDQLW-UHFFFAOYSA-N	CC12CCC(=O)C=C2CCC3C4CCC(=O)C4(C)CCC31	InChI=1S/C19H26O2/c1-18-9-7-13(20)11-12(18)3-4-14-15-5-6-17(21)19(15,2)10-8-16(14)18/h11,14-16H,3-10H2,1-2H3	3.294	52.381	349	0.789	126	34.14	0.119	0
antheraxanthin	640-03-9	C08579		5281223	27867	FDB014611	LMPR01070262	C40H56O3	584.872	AFC000929	OFNSUWBAQRCHAV-UHFFFAOYSA-N	CC(=CC=CC=C(C)C=CC=C(C)C=CC12C(C)(C)CC(CC1(C)O2)O)C=CC=C(C)C=CC3=C(C)CC(CC3(C)C)O	InChI=1S/C40H56O3/c1-29(17-13-19-31(3)21-22-36-33(5)25-34(41)26-37(36,6)7)15-11-12-16-30(2)18-14-20-32(4)23-24-40-38(8,9)27-35(42)28-39(40,10)43-40/h11-24,34-35,41-42H,25-28H2,1-10H3	8.263	110.146	1925	0.5	224	52.99	0.091	2
anthranilate	118-92-3	C00108	HMDB0001123	227	30754	FDB000896		C7H7NO2	137.136	AFC000034	RWZYAGGXGHYGMB-UHFFFAOYSA-N	C1=CC(=C(C=C1)N)C(=O)O	InChI=1S/C7H7NO2/c8-6-4-2-1-3-5(6)7(9)10/h1-4H,8H2,(H,9,10)	-0.229	19.692	76	0	46	63.32	0.462	0
apigenin	520-36-5	C01477	HMDB0002124	5280443	18388	FDB002798	LMPK12110005	C15H10O5	270.237	AFC000881	KZNIFHPLKGYRTM-UHFFFAOYSA-N	C1=CC(=CC=C1C2=CC(=O)C3=C(C=C(C=C3O)O)O2)O	InChI=1S/C15H10O5/c16-9-3-1-8(2-4-9)13-7-12(19)15-11(18)5-10(17)6-14(15)20-13/h1-7,16-18H	-0.117	37.078	338	0	108	86.99	0.322	0
apigenin 5-O-glucoside				14730806		FDB021657	LMPK12110339	C21H20O10	432.378	AFC001911	ZFPMFULXUJZHFG-UHFFFAOYSA-N	C1=CC(=CC=C1C2=CC(=O)C3=C(C=C(C=C3O2)O)O[C@H]4[C@@H]([C@H]([C@@H]([C@@H](CO)O4)O)O)O)O	InChI=1S/C21H20O10/c22-8-16-18(26)19(27)20(28)21(31-16)30-15-6-11(24)5-14-17(15)12(25)7-13(29-14)9-1-3-10(23)4-2-9/h1-7,16,18-24,26-28H,8H2	-2.208	58.316	757	0.286	168	166.14	0.384	1
apigenin-O-hexoside I	578-74-5	C04608	HMDB0037340	5280704	16778	FDB016362		C21H20O10	432.378	AFC000907	KMOUJOKENFFTPU-UHFFFAOYSA-N	C1=CC(=CC=C1C2=CC(=O)C3=C(C=C(C=C3O)OC4C(C(C(C(CO)O4)O)O)O)O2)O	InChI=1S/C21H20O10/c22-8-16-18(26)19(27)20(28)21(31-16)29-11-5-12(24)17-13(25)7-14(30-15(17)6-11)9-1-3-10(23)4-2-9/h1-7,16,18-24,26-28H,8H2	-2.208	58.316	770	0.286	168	166.14	0.384	1
apo-4'-lycopenal				50986183				C35H46O	482.74	AFC001428	QPKNTQUMMSIKLQ-UHFFFAOYSA-N	CC(=CCCC(=CC=CC(=CC=CC(=CC=CC=C(C)C=CC=C(C)C=CC=C(C)C=O)C)C)C)C	InChI=1S/C35H46O/c1-29(2)16-11-19-32(5)22-14-25-33(6)23-12-20-30(3)17-9-10-18-31(4)21-13-24-34(7)26-15-27-35(8)28-36/h9-10,12-18,20-28H,11,19H2,1-8H3	10.1	93.074	1483	0.286	152	17.07	0.035	2
apo-4'-lycopenoate				50986065				[C35H45O2]-	497.732	AFC001426	AWXQRWPOQLJGPZ-UHFFFAOYSA-M	CC(=CCCC(=CC=CC(=CC=CC(=CC=CC=C(C)C=CC=C(C)C=CC=C(C)C(=O)[O-])C)C)C)C	InChI=1S/C35H46O2/c1-28(2)16-11-19-31(5)22-14-24-32(6)23-12-20-29(3)17-9-10-18-30(4)21-13-25-33(7)26-15-27-34(8)35(36)37/h9-10,12-18,20-27H,11,19H2,1-8H3,(H,36,37)/p-1	9.375	93.21	1538	0.286	158	40.13	0.081	2
arachidic acid	506-30-9	C06425	HMDB0002212	10467	28822	FDB004028	LMFA01010020	C20H40O2	312.531	AFC000331	VKOBVWXKNCXXDE-UHFFFAOYSA-N	CCCCCCCCCCCCCCCCCCCC(=O)O	InChI=1S/C20H40O2/c1-2-3-4-5-6-7-8-9-10-11-12-13-14-15-16-17-18-19-20(21)22/h2-19H2,1H3,(H,21,22)	8.192	63.476	639	0.95	84	37.3	0.119	2
arachidonate	506-32-1	C00219	HMDB0001043	444899	15843	FDB011872	LMFA01030001	C20H32O2	304.468	AFC000766	YZXBAPSDXZZRGB-UHFFFAOYSA-N	CCCCCC=CCC=CCC=CCC=CCCCC(=O)O	InChI=1S/C20H32O2/c1-2-3-4-5-6-7-8-9-10-11-12-13-14-15-16-17-18-19-20(21)22/h6-7,9-10,12-13,15-16H,2-5,8,11,14,17-19H2,1H3,(H,21,22)	6.414	58.141	639	0.55	84	37.3	0.123	2
arginine	7200-25-1			232	29016	FDB002257		C6H14N4O2	174.201	AFC000036	ODKSFYDXXFIFQN-UHFFFAOYSA-N	C(CC(C(=O)O)N)CN=C(N)N	InChI=1S/C6H14N4O2/c7-4(5(11)12)2-1-3-10-6(8)9/h4H,1-3,7H2,(H,11,12)(H4,8,9,10)	-1.27	25.899	139	0.667	48	127.72	0.734	0
ascorbic acid	50-81-7	C01041	HMDB0000044	54670067	29073	FDB001224		C6H8O6	176.124	AFC001445	CIWBSHSKHKDKBQ-UHFFFAOYSA-N	C(C(C1C(=C(C(=O)O1)O)O)O)O	InChI=1S/C6H8O6/c7-1-2(8)5-3(9)4(10)6(11)12-5/h2,5,7-10H,1H2	-1.759	20.706	109	0.5	58	107.22	0.609	0
asparagine	3130-87-8	C16438		236	22653			C4H8N2O3	132.118	AFC000037	DCXYFEDJOCDNAF-UHFFFAOYSA-N	C(C(C(=O)O)N)C(=O)N	InChI=1S/C4H8N2O3/c5-2(4(8)9)1-3(6)7/h2H,1,5H2,(H2,6,7)(H,8,9)	-1.847	16.98	63	0.5	36	106.41	0.806	0
aspartic acid	56-84-8	C00049	HMDB0000191	5960	17053	FDB012567		C4H7NO4	133.103	AFC000223	CKLJMWTZIZZHCS-UHFFFAOYSA-N	C(C(C(=O)O)N)C(=O)O	InChI=1S/C4H7NO4/c5-2(4(8)9)1-3(6)7/h2H,1,5H2,(H,6,7)(H,8,9)	-1.245	16.016	63	0.5	36	100.62	0.756	0
aspartyl adenylate	19046-78-7	C03794	HMDB0000536	447145	57567	FDB022101		C14H18N5O11P	463.294	AFC000787	OFBHPPMPBOJXRT-UHFFFAOYSA-N	C(C(C(=O)O)NC1=NC=NC2=C1N=CN2C3C(C(C(COP(=O)(O)O)O3)O)O)C(=O)O	InChI=1S/C14H18N5O11P/c20-7(21)1-5(14(24)25)18-11-8-12(16-3-15-11)19(4-17-8)13-10(23)9(22)6(30-13)2-29-31(26,27)28/h3-6,9-10,13,22-23H,1-2H2,(H,20,21)(H,24,25)(H,15,16,18)(H2,26,27,28)	-3.978	54.594	739	0.5	164	253.21	0.547	2
avenastenone		C22123		102515167		FDB030684		C29H46O	410.676	AFC001518	XHRPJMCAEXVFFM-UHFFFAOYSA-N	CC=C(CCC(C)C1CCC2C3=CCC4CC(=O)CCC4(C)C3CCC12C)C(C)C	InChI=1S/C29H46O/c1-7-21(19(2)3)9-8-20(4)25-12-13-26-24-11-10-22-18-23(30)14-16-28(22,5)27(24)15-17-29(25,26)6/h7,11,19-20,22,25-27H,8-10,12-18H2,1-6H3	7.508	82.514	725	0.828	168	17.07	0.042	1
azelaic acid	123-99-9	C08261	HMDB0000784	2266	48131	FDB012192		C9H16O4	188.221	AFC000197	BDJRBEYXGGNYIS-UHFFFAOYSA-N	C(CCCC(=O)O)CCCC(=O)O	InChI=1S/C9H16O4/c10-8(11)6-4-2-1-3-5-7-9(12)13/h1-7H2,(H,10,11)(H,12,13)	1.871	29.717	188	0.778	50	74.6	0.397	0
baohuoside I	113558-15-9			5488822	82619		LMPK12112003	C27H30O10	514.522	AFC001074	NGMYNFJANBHLKA-UHFFFAOYSA-N	CC(=CCC1=C(C=C(C2=C1OC(=C(C2=O)OC3C(C(C(C(C)O3)O)O)O)C4=CC=C(C=C4)OC)O)O)C	InChI=1S/C27H30O10/c1-12(2)5-10-16-17(28)11-18(29)19-21(31)26(37-27-23(33)22(32)20(30)13(3)35-27)24(36-25(16)19)14-6-8-15(34-4)9-7-14/h5-9,11,13,20,22-23,27-30,32-33H,10H2,1-4H3	-0.002	75.544	835	0.37	198	155.14	0.302	1
behenate	112-85-6	C08281	HMDB0000944	5460660	23858	FDB021815	LMFA01010022	[C22H43O2]-	339.576	AFC001062	UKMSUNONTOPOIO-UHFFFAOYSA-M	CCCCCCCCCCCCCCCCCCCCCC(=O)[O-]	InChI=1S/C22H44O2/c1-2-3-4-5-6-7-8-9-10-11-12-13-14-15-16-17-18-19-20-21-22(23)24/h2-21H2,1H3,(H,23,24)/p-1	8.427	68.996	769	0.955	92	40.13	0.118	2
benzaldehyde	100-52-7	C00261	HMDB0006115	240	17169	FDB014661		C7H6O	106.122	AFC000039	HUMNYLRZRPPJDN-UHFFFAOYSA-N	C1=CC=C(C=C1)C=O	InChI=1S/C7H6O/c8-6-7-4-2-1-3-5-7/h1-6H	1.015	17.123	60	0	34	17.07	0.161	0
benzamidine	618-39-3	C01784		2332	41033			C7H8N2	120.152	AFC001843	PXXJHWLDUBFPOL-UHFFFAOYSA-N	C1=CC=C(C=C1)C(=N)N	InChI=1S/C7H8N2/c8-7(9)6-4-2-1-3-5-6/h1-5H,(H3,8,9)	0.42	19.854	69	0	40	49.87	0.415	0
benzoate	766-76-7	C00180	HMDB0001870	242	16150	FDB030689		[C7H5O2]-	121.114	AFC000040	WPYMKLBDIGXBTP-UHFFFAOYSA-M	C1=CC=C(C=C1)C(=O)[O-]	InChI=1S/C7H6O2/c8-7(9)6-4-2-1-3-5-6/h1-5H,(H,8,9)/p-1	0.29	17.258	69	0	40	40.13	0.332	0
benzoic acid	65-85-0	C00539	HMDB0001870	243	30746	FDB008739		C7H6O2	122.122	AFC001837	WPYMKLBDIGXBTP-UHFFFAOYSA-N	C1=CC=C(C=C1)C(=O)O	InChI=1S/C7H6O2/c8-7(9)6-4-2-1-3-5-6/h1-5H,(H,8,9)	0.968	17.925	69	0	40	37.3	0.306	0
benzoyl-CoA	6756-74-7	C00512	HMDB0002252	9543169	15515	FDB022929		C28H40N7O17P3S	871.642	AFC001128	VEVJTUNLALKRNO-UHFFFAOYSA-N	CC(C)(COP(=O)(O)OP(=O)(O)OCC1C(C(C(N2C=NC3=C2N=CN=C3N)O1)O)OP(=O)(O)O)C(C(=O)NCCC(=O)NCCSC(=O)C4=CC=CC=C4)O	InChI=1S/C28H40N7O17P3S/c1-28(2,22(38)25(39)31-9-8-18(36)30-10-11-56-27(40)16-6-4-3-5-7-16)13-49-55(46,47)52-54(44,45)48-12-17-21(51-53(41,42)43)20(37)26(50-17)35-15-34-19-23(29)32-14-33-24(19)35/h3-7,14-15,17,20-22,26,37-38H,8-13H2,1-2H3,(H,30,36)(H,31,39)(H,44,45)(H,46,47)(H2,29,32,33)(H2,41,42,43)	-4.218	111.076	2753	0.5	292	415.08	0.476	4
benzoylsuccinyl-CoA		C09820		442449	28882			C32H44N7O20P3S	971.715	AFC000739	SGNPJINSCKFITG-UHFFFAOYSA-N	CC(C)(COP(=O)(O)OP(=O)(O)OCC1C(C(C(N2C=NC3=C2N=CN=C3N)O1)O)OP(=O)(O)O)C(C(=O)NCCC(=O)NCCSC(=O)C(CC(=O)O)C(=O)C4=CC=CC=C4)O	InChI=1S/C32H44N7O20P3S/c1-32(2,26(45)29(46)35-9-8-20(40)34-10-11-63-31(47)18(12-21(41)42)23(43)17-6-4-3-5-7-17)14-56-62(53,54)59-61(51,52)55-13-19-25(58-60(48,49)50)24(44)30(57-19)39-16-38-22-27(33)36-15-37-28(22)39/h3-7,15-16,18-19,24-26,30,44-45H,8-14H2,1-2H3,(H,34,40)(H,35,46)(H,41,42)(H,51,52)(H,53,54)(H2,33,36,37)(H2,48,49,50)	-4.831	123.189	3326	0.5	326	469.45	0.483	4
benzyl alcohol	100-51-6	C03485	HMDB0003119	244	17987	FDB008745		C7H8O	108.138	AFC000041	WVDDGKGOMKODPV-UHFFFAOYSA-N	C1=CC=C(C=C1)CO	InChI=1S/C7H8O/c8-6-7-4-2-1-3-5-7/h1-5,8H,6H2	0.759	18.456	60	0.143	34	20.23	0.187	0
benzyl Œ≤-D-glucoside				4984739				C13H18O6	270.279	AFC001800	GKHCBYYBLTXYEV-UHFFFAOYSA-N	C1=CC=C(C=C1)CO[C@H]2[C@@H]([C@H]([C@@H]([C@@H](CO)O2)O)O)O	InChI=1S/C13H18O6/c14-6-9-10(15)11(16)12(17)13(19-9)18-7-8-4-2-1-3-5-8/h1-5,9-17H,6-7H2	-0.988	39.694	314	0.538	94	99.38	0.368	0
benzylbenzoate	120-51-4	C12537	HMDB0014814	2345	41237	FDB012844		C14H12O2	212.244	AFC000198	SESFRYSPDFLNCH-UHFFFAOYSA-N	C1=CC=C(C=C1)COC(=O)C2=CC=CC=C2	InChI=1S/C14H12O2/c15-14(13-9-5-2-6-10-13)16-11-12-7-3-1-4-8-12/h1-10H,11H2	2.336	34.246	265	0.071	76	26.3	0.124	0
beta-(pyrazole-1-yl)-L-alanine	10162-27-3	C01162	HMDB0034267	151491	16357	FDB012598		C6H9N3O2	155.155	AFC000562	PIGOPELHGLPKLL-UHFFFAOYSA-N	C1=CN(CC(C(=O)O)N)N=C1	InChI=1S/C6H9N3O2/c7-5(6(10)11)4-9-3-1-2-8-9/h1-3,5H,4,7H2,(H,10,11)	-1.103	21.465	106	0.333	50	78.92	0.509	0
beta-acoradiene				5316209				C15H24	204.352	AFC000998	DVBSKQAFCDJNSL-UHFFFAOYSA-N	C=C(C)C1CCC(C)C21CC=C(C)CC2	InChI=1S/C15H24/c1-11(2)14-6-5-13(4)15(14)9-7-12(3)8-10-15/h7,13-14H,1,5-6,8-10H2,2-4H3	4.753	42.403	169	0.733	80	0	0	1
beta-alanine	107-95-9	C00099	HMDB0000056	239	16958	FDB002253		C3H7NO2	89.0933	AFC000038	UCMIRNVEIXFBKS-UHFFFAOYSA-N	C(CN)C(=O)O	InChI=1S/C3H7NO2/c4-2-1-3(5)6/h1-2,4H2,(H,5,6)	-0.943	12.652	31	0.667	20	63.32	0.711	0
beta-amyrin	559-70-6	C08616		73145	10352	FDB004092	LMPR0106150015	C30H50O	426.719	AFC000454	JFSHUTJDVKUMTJ-UHFFFAOYSA-N	CC1(C)CCC2(C)CCC3(C)C(=CCC4C5(C)CCC(C(C)(C)C5CCC43C)O)C2C1	InChI=1S/C30H50O/c1-25(2)15-16-27(5)17-18-29(7)20(21(27)19-25)9-10-23-28(6)13-12-24(31)26(3,4)22(28)11-14-30(23,29)8/h9,21-24,31H,10-19H2,1-8H3	7.304	86.942	627	0.933	194	20.23	0.047	1
beta-bisabolol	15352-77-9		HMDB0036111	27208		FDB014957		C15H26O	222.367	AFC001194	WTVHAMTYZJGJLJ-UHFFFAOYSA-N	CC(=CCCC(C)C1(CC=C(C)CC1)O)C	InChI=1S/C15H26O/c1-12(2)6-5-7-14(4)15(16)10-8-13(3)9-11-15/h6,8,14,16H,5,7,9-11H2,1-4H3	4.377	44.539	238	0.733	76	20.23	0.091	0
beta-cryptoxanthin	472-70-8	C08591	HMDB0033844	5281235	10362	FDB012019	LMPR01070269	C40H56O	552.874	AFC000932	DMASLKHVQRHNES-UHFFFAOYSA-N	CC(=CC=CC=C(C)C=CC=C(C)C=CC1=C(C)CC(CC1(C)C)O)C=CC=C(C)C=CC2=C(C)CCCC2(C)C	InChI=1S/C40H56O/c1-30(18-13-20-32(3)23-25-37-34(5)22-15-27-39(37,7)8)16-11-12-17-31(2)19-14-21-33(4)24-26-38-35(6)28-36(41)29-40(38,9)10/h11-14,16-21,23-26,36,41H,15,22,27-29H2,1-10H3	10.762	108.542	1734	0.45	200	20.23	0.037	2
beta-cyclocitral	432-25-7	C20425	HMDB0041011	9895	53177	FDB020874		C10H16O	152.234	AFC000324	MOQGCGNUWBPGTQ-UHFFFAOYSA-N	CC1=C(C=O)C(C)(C)CCC1	InChI=1S/C10H16O/c1-8-5-4-6-10(2,3)9(8)7-11/h7H,4-6H2,1-3H3	2.809	29.071	81	0.7	54	17.07	0.112	0
beta-D-altropyranose	7283-10-5			448702	148773			C6H12O6	180.156	AFC000214	WQZGKKKJIJFFOK-UHFFFAOYSA-N	C(C1C(C(C(C(O)O1)O)O)O)O	InChI=1S/C6H12O6/c7-1-2-3(8)4(9)5(10)6(11)12-2/h2-11H,1H2	-2.513	23.374	108	1	58	110.38	0.613	0
beta-D-fructofuranose	53188-23-1	C02336	HMDB0000660	439709	28645	FDB031286		C6H12O6	180.156	AFC000697	RFSUNEUAIZKAJO-UHFFFAOYSA-N	C(C1C(C(C(CO)(O)O1)O)O)O	InChI=1S/C6H12O6/c7-1-3-4(9)5(10)6(11,2-8)12-3/h3-5,7-11H,1-2H2	-2.564	23.374	105	1	60	110.38	0.613	0
beta-D-fructose 2,6-bisphosphate	79082-92-1	C00665	HMDB0001047	105021	28602	FDB022390		C6H14O12P2	340.116	AFC000507	YXWOAJXNVLXPMU-UHFFFAOYSA-N	C(C1C(C(C(CO)(O1)OP(=O)(O)O)O)O)OP(=O)(O)O	InChI=1S/C6H14O12P2/c7-2-6(18-20(13,14)15)5(9)4(8)3(17-6)1-16-19(10,11)12/h3-5,7-9H,1-2H2,(H2,10,11,12)(H2,13,14,15)	-4.184	36.779	275	1	104	223.06	0.656	2
beta-D-galactopyranuronic acid	18968-14-4	C08348	HMDB0003402	441476	47954	FDB023162		C6H10O7	194.14	AFC000497	AEMOLEFTQBMNLQ-UHFFFAOYSA-N	C1(C(C(C(=O)O)OC(C1O)O)O)O	InChI=1S/C6H10O7/c7-1-2(8)4(5(10)11)13-6(12)3(1)9/h1-4,6-9,12H,(H,10,11)	-2.305	22.842	119	0.833	64	127.45	0.657	0
beta-D-galactose	7296-64-2	C00962	HMDB0003449	439353	27667	FDB021788		C6H12O6	180.156	AFC000214	WQZGKKKJIJFFOK-UHFFFAOYSA-N	C(C1C(C(C(C(O)O1)O)O)O)O	InChI=1S/C6H12O6/c7-1-2-3(8)4(9)5(10)6(11)12-2/h2-11H,1H2	-2.513	23.374	108	1	58	110.38	0.613	0
beta-D-glucopyranoside, 2-(hydroxymethyl)phenyl	138-52-3	C01451	HMDB0003546	5145	17814	FDB023184		C13H18O7	286.278	AFC000208	NGFMICBWJRZIBI-UHFFFAOYSA-N	C1=CC(=C(C=C1)OC2C(C(C(C(CO)O2)O)O)O)CO	InChI=1S/C13H18O7/c14-5-7-3-1-2-4-8(7)19-13-12(18)11(17)10(16)9(6-15)20-13/h1-4,9-18H,5-6H2	-1.895	40.496	298	0.538	100	119.61	0.418	0
beta-D-glucopyranosyl abscisate		C15970		46173811	22151		LMPR0103050011	C21H30O9	426.458	AFC001405	HLVPIMVSSMJFPS-UHFFFAOYSA-N	CC(=CC(=O)OC1C(C(C(C(CO)O1)O)O)O)C=CC2(C(=CC(=O)CC2(C)C)C)O	InChI=1S/C21H30O9/c1-11(5-6-21(28)12(2)8-13(23)9-20(21,3)4)7-15(24)30-19-18(27)17(26)16(25)14(10-22)29-19/h5-8,14,16-19,22,25-28H,9-10H2,1-4H3	0.092	64.182	730	0.619	156	153.75	0.361	0
beta-D-glucose	492-61-5	C00221	HMDB0000122	64689	15903	FDB011824		C6H12O6	180.156	AFC000214	WQZGKKKJIJFFOK-UHFFFAOYSA-N	C(C1C(C(C(C(O)O1)O)O)O)O	InChI=1S/C6H12O6/c7-1-2-3(8)4(9)5(10)6(11)12-2/h2-11H,1H2	-2.513	23.374	108	1	58	110.38	0.613	0
beta-D-glucose 1-phosphate	55607-88-0	C00663		122250	16218	FDB031290		C6H13O9P	260.136	AFC000437	HXXFSFRBOHSIMQ-UHFFFAOYSA-N	C(C1C(C(C(C(O1)OP(=O)(O)O)O)O)O)O	InChI=1S/C6H13O9P/c7-1-2-3(8)4(9)5(10)6(14-2)15-16(11,12)13/h2-10H,1H2,(H2,11,12,13)	-3.324	30.076	176	1	80	166.72	0.641	1
beta-D-glucose-6-phosphate	15209-12-8	C01172	HMDB0003498	439427	17719	FDB031291		C6H13O9P	260.136	AFC000029	NBSCHQHZLSJFNQ-UHFFFAOYSA-N	C(C1C(C(C(C(O)O1)O)O)O)OP(=O)(O)O	InChI=1S/C6H13O9P/c7-3-2(1-14-16(11,12)13)15-6(10)5(9)4(3)8/h2-10H,1H2,(H2,11,12,13)	-3.324	30.076	196	1	80	166.72	0.641	1
beta-D-mannose	7322-31-8	C02209		439680	28563			C6H12O6	180.156	AFC000214	WQZGKKKJIJFFOK-UHFFFAOYSA-N	C(C1C(C(C(C(O)O1)O)O)O)O	InChI=1S/C6H12O6/c7-1-2-3(8)4(9)5(10)6(11)12-2/h2-11H,1H2	-2.513	23.374	108	1	58	110.38	0.613	0
beta-D-ribofuranose	36468-53-8	C16639	HMDB0000283	447347	47002	FDB031292		C5H10O5	150.13	AFC000778	HMFHBZSHGGEWLO-UHFFFAOYSA-N	C(C1C(C(C(O)O1)O)O)O	InChI=1S/C5H10O5/c6-1-2-3(7)4(8)5(9)10-2/h2-9H,1H2	-2.003	19.478	75	1	48	90.15	0.601	0
beta-D-xylopyranose	2460-44-8			125409	28161	FDB031294		C5H10O5	150.13	AFC000229	SRBFZHDQGSBBOR-UHFFFAOYSA-N	C1C(C(C(C(O)O1)O)O)O	InChI=1S/C5H10O5/c6-2-1-10-5(9)4(8)3(2)7/h2-9H,1H2	-2.003	19.478	76	1	48	90.15	0.601	0
beta-elemene	515-13-9	C17094	HMDB0061848	6918391	62855	FDB014578		C15H24	204.352	AFC001116	OPFTUNCRGUEPRZ-UHFFFAOYSA-N	C=CC1(C)CCC(CC1C(=C)C)C(=C)C	InChI=1S/C15H24/c1-7-15(6)9-8-13(11(2)3)10-14(15)12(4)5/h7,13-14H,1-2,4,8-10H2,3,5-6H3	4.788	42.403	157	0.6	74	0	0	1
beta-fructose-1,6-diphosphate	488-69-7	C05378	HMDB0001058	10267	28013	FDB022397		C6H14O12P2	340.116	AFC000327	RNBGYGVWRKECFJ-UHFFFAOYSA-N	C(C1C(C(C(COP(=O)(O)O)(O)O1)O)O)OP(=O)(O)O	InChI=1S/C6H14O12P2/c7-4-3(1-16-19(10,11)12)18-6(9,5(4)8)2-17-20(13,14)15/h3-5,7-9H,1-2H2,(H2,10,11,12)(H2,13,14,15)	-4.184	36.779	301	1	104	223.06	0.656	2
betaine	107-43-7	C00719	HMDB0000043	247	17750	FDB009020		C5H11NO2	117.147	AFC000042	KWIUHFFTVRNATP-UHFFFAOYSA-N	C[N+](C)(C)CC(=O)[O-]	InChI=1S/C5H11NO2/c1-6(2,3)4-5(7)8/h4H2,1-3H3	-2.043	18.839	45	0.8	34	40.13	0.343	0
betaine aldehyde	7418-61-3	C00576	HMDB0001252	249	15710	FDB022513		[C5H12NO]+	102.155	AFC000043	SXKNCCSPZDCRFD-UHFFFAOYSA-N	C[N+](C)(C)CC=O	InChI=1S/C5H12NO/c1-6(2,3)4-5-7/h5H,4H2,1-3H3/q+1	-1.318	18.704	38	0.8	28	17.07	0.167	0
betaine aldehyde hydrate		C07345		6395359	15870	FDB030693		[C5H14NO2]+	120.17	AFC001086	HEHORKLRCFPRON-UHFFFAOYSA-N	C[N+](C)(C)CC(O)O	InChI=1S/C5H14NO2/c1-6(2,3)4-5(7)8/h5,7-8H,4H2,1-3H3/q+1	-1.914	20.839	45	1	34	40.46	0.337	0
beta-ionone	79-77-6	C12287	HMDB0036565	638014	32325	FDB015469		C13H20O	192.298	AFC000811	PSQYTAPXSHCGMF-UHFFFAOYSA-N	CC1=C(C=CC(=O)C)C(C)(C)CCC1	InChI=1S/C13H20O/c1-10-6-5-9-13(3,4)12(10)8-7-11(2)14/h7-8H,5-6,9H2,1-4H3	3.215	37.018	153	0.615	68	17.07	0.089	0
beta-ionone epoxide	23267-57-4		HMDB0034984	5352481	87546	FDB013585		C13H20O2	208.297	AFC001007	ZTJZJYUGOJYHCU-UHFFFAOYSA-N	CC(=O)C=CC12C(C)(C)CCCC1(C)O2	InChI=1S/C13H20O2/c1-10(14)6-9-13-11(2,3)7-5-8-12(13,4)15-13/h6,9H,5,7-8H2,1-4H3	2.077	37.82	172	0.769	86	29.6	0.142	0
beta-L-arabinose 1-phosphate	50574-25-9	C03906	HMDB0012195	440160	15807	FDB028844		C5H11O8P	230.11	AFC000706	ILXHFXFPPZGENN-UHFFFAOYSA-N	C1C(C(C(C(O1)OP(=O)(O)O)O)O)O	InChI=1S/C5H11O8P/c6-2-1-12-5(4(8)3(2)7)13-14(9,10)11/h2-8H,1H2,(H2,9,10,11)	-2.813	26.181	148	1	70	146.49	0.637	0
beta-L-galactopyranose	42789-83-3			6971007	37620			C6H12O6	180.156	AFC000214	WQZGKKKJIJFFOK-UHFFFAOYSA-N	C(C1C(C(C(C(O)O1)O)O)O)O	InChI=1S/C6H12O6/c7-1-2-3(8)4(9)5(10)6(11)12-2/h2-11H,1H2	-2.513	23.374	108	1	58	110.38	0.613	0
beta-myrcene	123-35-3	C06074	HMDB0038169	31253	17221	FDB017400	LMPR0102010005	C10H16	136.234	AFC000408	UAHWPYUMFXYFJY-UHFFFAOYSA-N	C=CC(=C)CCC=C(C)C	InChI=1S/C10H16/c1-5-10(4)8-6-7-9(2)3/h5,7H,1,4,6,8H2,2-3H3	3.688	28.269	98	0.4	38	0	0	0
beta-sesquiphellandrene	20307-83-9	C16776	HMDB0036163	12315492	64361	FDB015016		C15H24	204.352	AFC001199	PHWISBHSBNDZDX-UHFFFAOYSA-N	CC(=CCCC(C)C1C=CC(=C)CC1)C	InChI=1S/C15H24/c1-12(2)6-5-7-14(4)15-10-8-13(3)9-11-15/h6,8,10,14-15H,3,5,7,9,11H2,1-2,4H3	5.135	42.403	225	0.6	68	0	0	1
beta-sitosterol	83-46-5	C01753	HMDB0000852	222284	27693	FDB012362	LMST01040129	C29H50O	414.708	AFC000623	KZJWDPNRJALLNS-UHFFFAOYSA-N	CCC(CCC(C)C1CCC2C3CC=C4CC(CCC4(C)C3CCC12C)O)C(C)C	InChI=1S/C29H50O/c1-7-21(19(2)3)9-8-20(4)25-12-13-26-24-11-10-22-18-23(30)14-16-28(22,5)27(24)15-17-29(25,26)6/h10,19-21,23-27,30H,7-9,11-18H2,1-6H3	8.084	85.182	725	0.931	168	20.23	0.049	1
beta-tocopherol	148-03-8	C14152	HMDB0006335	6857447	47771	FDB012381	LMPR02020055	C28H48O2	416.681	AFC001115	WGVKWNUPNGFDFJ-UHFFFAOYSA-N	CC(C)CCCC(C)CCCC(C)CCCC1(C)CCC2=C(C)C(=CC(=C2O1)C)O	InChI=1S/C28H48O2/c1-20(2)11-8-12-21(3)13-9-14-22(4)15-10-17-28(7)18-16-25-24(6)26(29)19-23(5)27(25)30-28/h19-22,29H,8-18H2,1-7H3	8.605	82.89	910	0.786	148	29.46	0.071	2
bilirubin	635-65-4	C00486	HMDB0000054	5280352	16990	FDB021886		C33H36N4O6	584.663	AFC000871	BPYKTIZUTYGOLE-UHFFFAOYSA-N	C=CC1=C(C)C(=O)NC1=CC2=C(C)C(=C(CC3=C(CCC(=O)O)C(=C(C=C4C(=C(C=C)C(=O)N4)C)N3)C)N2)CCC(=O)O	InChI=1S/C33H36N4O6/c1-7-20-19(6)32(42)37-27(20)14-25-18(5)23(10-12-31(40)41)29(35-25)15-28-22(9-11-30(38)39)17(4)24(34-28)13-26-16(3)21(8-2)33(43)36-26/h7-8,13-14,34-35H,1-2,9-12,15H2,3-6H3,(H,36,43)(H,37,42)(H,38,39)(H,40,41)	1.727	91.297	1203	0.273	226	156.86	0.268	3
biliverdin-IX-alpha	57158-62-0	C00500	HMDB0001008	6443316	16990	FDB030697		[C35H36N4O6]2-	608.685	AFC001101	UYHZQOJAPATOSQ-UHFFFAOYSA-L	C=CC1=C(C)C(=NC1=CC2=C(C)C(=C(C=C3C(=C(C)C(=N3)C=C4C(=C(C=C)C(=N4)[O-])C)CCC(=O)OC)N2)CCC(=O)OC)[O-]	InChI=1S/C35H38N4O6/c1-9-22-21(6)34(42)39-29(22)16-27-20(5)25(12-14-33(41)45-8)31(37-27)17-30-24(11-13-32(40)44-7)19(4)26(36-30)15-28-18(3)23(10-2)35(43)38-28/h9-10,15-17,37H,1-2,11-14H2,3-8H3,(H,38,43)(H,39,42)/p-2	2.886	94.817	1263	0.286	234	147.83	0.243	2
biotin	58-85-5	C00120	HMDB0000030	171548	15956	FDB014510		C10H16N2O3S	244.312	AFC000598	YBJHBAHKTGYVGT-UHFFFAOYSA-N	C(CCC(=O)O)CC1C2C(CS1)NC(=O)N2	InChI=1S/C10H16N2O3S/c13-8(14)4-2-1-3-7-9-6(5-16-7)11-10(15)12-9/h6-7,9H,1-5H2,(H,13,14)(H2,11,12,15)	0.645	35.775	263	0.8	80	103.73	0.425	0
brassicasterol	474-67-9	C08813	HMDB0011181	5281327	3168	FDB012496	LMST01030098	C28H46O	398.665	AFC000940	OILXMJHPFNGGTO-UHFFFAOYSA-N	CC(C)C(C)C=CC(C)C1CCC2C3CC=C4CC(CCC4(C)C3CCC12C)O	InChI=1S/C28H46O/c1-18(2)19(3)7-8-20(4)24-11-12-25-23-10-9-21-17-22(29)13-15-27(21,5)26(23)14-16-28(24,25)6/h7-9,18-20,22-26,29H,10-17H2,1-6H3	7.183	80.754	696	0.857	164	20.23	0.051	1
bryoamaride	61105-51-9			44406496				C36H54O12	678.808	AFC001786	QCAZYVAEXLGYLV-UHFFFAOYSA-N	CC(C)(CCC(=O)C(C)(C1C(CC2(C)C3CC=C4C(C=C(C(=O)C4(C)C)OC5C(C(C(C(CO)O5)O)O)O)C3(C)C(=O)CC12C)O)O)O	InChI=1S/C36H54O12/c1-31(2,45)12-11-23(39)36(8,46)28-19(38)14-33(5)22-10-9-17-18(35(22,7)24(40)15-34(28,33)6)13-20(29(44)32(17,3)4)47-30-27(43)26(42)25(41)21(16-37)48-30/h9,13,18-19,21-22,25-28,30,37-38,41-43,45-46H,10-12,14-16H2,1-8H3	-0.488	108.991	1450	0.806	280	211.28	0.311	3
bryonolal								C30H50O2	442.718	AFC001235	ZTFHGNGMNAIRAI-UHFFFAOYSA-N	CC1(C)C2CCC3=C(CCC4(C)C5CC(C)(CCC5(C)CCC34C)CO)C2(C)CCC1O	InChI=1S/C30H50O2/c1-25(2)22-9-8-21-20(28(22,5)12-11-24(25)32)10-13-30(7)23-18-26(3,19-31)14-15-27(23,4)16-17-29(21,30)6/h22-24,31-32H,8-19H2,1-7H3	6.408	87.744	690	0.933	198	40.46	0.091	1
bryonolic acid	24480-45-3		HMDB0036757	159970	65846	FDB015696	LMPR0106150028	C30H48O3	456.701	AFC000568	BHVJSLPLFOAMEV-UHFFFAOYSA-N	CC1(C)C2CCC3=C(CCC4(C)C5CC(C)(CCC5(C)CCC34C)C(=O)O)C2(C)CCC1O	InChI=1S/C30H48O3/c1-25(2)21-9-8-20-19(28(21,5)12-11-23(25)31)10-13-30(7)22-18-27(4,24(32)33)15-14-26(22,3)16-17-29(20,30)6/h21-23,31H,8-18H2,1-7H3,(H,32,33)	6.617	87.212	715	0.9	204	57.53	0.126	1
bryonolol	39765-50-9			15756408				C30H50O2	442.718	AFC001235	ZTFHGNGMNAIRAI-UHFFFAOYSA-N	CC1(C)C2CCC3=C(CCC4(C)C5CC(C)(CCC5(C)CCC34C)CO)C2(C)CCC1O	InChI=1S/C30H50O2/c1-25(2)22-9-8-21-20(28(22,5)12-11-24(25)32)10-13-30(7)23-18-26(3,19-31)14-15-27(23,4)16-17-29(21,30)6/h22-24,31-32H,8-19H2,1-7H3	6.408	87.744	690	0.933	198	40.46	0.091	1
butane-2,3-diyl diacetate	1114-92-7			66193				C8H14O4	174.195	AFC000439	VVSAAKSQXNXBML-UHFFFAOYSA-N	CC(C(C)OC(=O)C)OC(=O)C	InChI=1S/C8H14O4/c1-5(11-7(3)9)6(2)12-8(4)10/h5-6H,1-4H3	0.616	26.623	118	0.75	50	52.6	0.302	0
butanethiol-S-oxide								C4H10OS	106.188	AFC001609	DZVCAVAOFKSZOR-UHFFFAOYSA-N	CCCCS=O	InChI=1S/C4H10OS/c1-2-3-4-6-5/h6H,2-4H2,1H3	1.408	17.41	38	1	18	17.07	0.161	0
butanoyl-CoA	2140-48-9	C00136	HMDB0001088	122283	15517	FDB022419	LMFA07050292	C25H42N7O17P3S	837.626	AFC000531	CRFNGMNYKDXRTN-UHFFFAOYSA-N	CCCC(=O)SCCNC(=O)CCNC(=O)C(C(C)(C)COP(=O)(O)OP(=O)(O)OCC1C(C(C(N2C=NC3=C2N=CN=C3N)O1)O)OP(=O)(O)O)O	InChI=1S/C25H42N7O17P3S/c1-4-5-16(34)53-9-8-27-15(33)6-7-28-23(37)20(36)25(2,3)11-46-52(43,44)49-51(41,42)45-10-14-19(48-50(38,39)40)18(35)24(47-14)32-13-31-17-21(26)29-12-30-22(17)32/h12-14,18-20,24,35-36H,4-11H2,1-3H3,(H,27,33)(H,28,37)(H,41,42)(H,43,44)(H2,26,29,30)(H2,38,39,40)	-4.292	107.129	2454	0.68	272	415.08	0.496	4
cadaverine	462-94-2	C01672	HMDB0002322	273	18127	FDB001493		C5H14N2	102.178	AFC000047	VHRGRCVQAFMJIZ-UHFFFAOYSA-N	C(CCN)CCN	InChI=1S/C5H14N2/c6-4-2-1-3-5-7/h1-7H2	-0.378	20.335	54	1	22	52.04	0.51	0
caffeic acid	331-39-5	C01481	HMDB0001964	689043	36281	FDB002558		C9H8O4	180.158	AFC000836	QAIPRVGONGVQAS-UHFFFAOYSA-N	C1=C(C=CC(=O)O)C=C(C(=C1)O)O	InChI=1S/C9H8O4/c10-7-3-1-6(5-8(7)11)2-4-9(12)13/h1-5,10-11H,(H,12,13)	0.31	24.382	157	0	60	77.76	0.432	0
caffeoyl-CoA	53034-79-0	C00323		11966126	15518	FDB030708	LMFA07050293	C30H42N7O19P3S	929.679	AFC001181	QHRGJMIMHCLHRG-UHFFFAOYSA-N	CC(C)(COP(=O)(O)OP(=O)(O)OCC1C(C(C(N2C=NC3=C2N=CN=C3N)O1)O)OP(=O)(O)O)C(C(=O)NCCC(=O)NCCSC(=O)C=CC4=CC=C(C(=C4)O)O)O	InChI=1S/C30H42N7O19P3S/c1-30(2,25(43)28(44)33-8-7-20(40)32-9-10-60-21(41)6-4-16-3-5-17(38)18(39)11-16)13-53-59(50,51)56-58(48,49)52-12-19-24(55-57(45,46)47)23(42)29(54-19)37-15-36-22-26(31)34-14-35-27(22)37/h3-6,11,14-15,19,23-25,29,38-39,42-43H,7-10,12-13H2,1-2H3,(H,32,40)(H,33,44)(H,48,49)(H,50,51)(H2,31,34,35)(H2,45,46,47)	-4.876	117.533	3246	0.467	312	455.54	0.49	4
caffeoyl-glucose	14364-08-0	C10433	HMDB0036937	129888613		FDB015906		C15H18O9	342.299	AFC001540	HUXWBFFRUHXOBU-UHFFFAOYSA-N	C1=C(C=CC(=O)C(=O)C(C(C(C(CO)O)O)O)O)C=C(C(=C1)O)O	InChI=1S/C15H18O9/c16-6-11(20)13(22)15(24)14(23)12(21)9(18)4-2-7-1-3-8(17)10(19)5-7/h1-5,11,13-17,19-20,22-24H,6H2	-2.47	45.62	508	0.333	114	175.75	0.514	1
calodendroside A				101030299				C27H32O17	628.534	AFC001510	NUXDOXKWHHKVSD-UHFFFAOYSA-N	C1=C(C=C(C(=C1)O)O)C2C(C(=O)C3=C(C=C(C=C3O)O)O2)OC4C(C(C(C(CO)O4)O)O)OC5C(C(C(C(CO)O5)O)O)O	InChI=1S/C27H32O17/c28-6-14-17(34)20(37)22(39)26(41-14)44-25-21(38)18(35)15(7-29)42-27(25)43-24-19(36)16-12(33)4-9(30)5-13(16)40-23(24)8-1-2-10(31)11(32)3-8/h1-5,14-15,17-18,20-35,37-39H,6-7H2	-4.756	82.491	1117	0.519	240	285.75	0.455	3
campestanol	474-60-2	C15787	HMDB0000534	119394	36799	FDB030711	LMST01030103	C28H50O	402.697	AFC000522	ARYTXMNEANMLMU-UHFFFAOYSA-N	CC(C)C(C)CCC(C)C1CCC2C3CCC4CC(CCC4(C)C3CCC12C)O	InChI=1S/C28H50O/c1-18(2)19(3)7-8-20(4)24-11-12-25-23-10-9-21-17-22(29)13-15-27(21,5)26(23)14-16-28(24,25)6/h18-26,29H,7-17H2,1-6H3	7.878	83.422	696	1	164	20.23	0.05	1
campesterol	474-62-4	C01789	HMDB0002869	173183	28623	FDB012521	LMST01030097	C28H48O	400.681	AFC000601	SGNBVLSWZMBQTH-UHFFFAOYSA-N	CC(C)C(C)CCC(C)C1CCC2C3CC=C4CC(CCC4(C)C3CCC12C)O	InChI=1S/C28H48O/c1-18(2)19(3)7-8-20(4)24-11-12-25-23-10-9-21-17-22(29)13-15-27(21,5)26(23)14-16-28(24,25)6/h9,18-20,22-26,29H,7-8,10-17H2,1-6H3	7.628	82.088	696	0.929	164	20.23	0.051	1
camptothecin	7689-03-4	C01897		24360	27656			C20H16N2O4	348.353	AFC000390	VSJKWCGYPAHWDS-UHFFFAOYSA-N	CCC1(C2=C(COC1=O)C(=O)N3CC4=CC5=C(C=CC=C5)N=C4C3=C2)O	InChI=1S/C20H16N2O4/c1-2-20(25)14-8-16-17-12(7-11-5-3-4-6-15(11)21-17)9-22(16)18(23)13(14)10-26-19(20)24/h3-8,25H,2,9-10H2,1H3	0.54	51.277	497	0.25	154	79.2	0.228	0
canaline	496-93-5	C08270	HMDB0012251	441443	41401	FDB030959		C4H10N2O3	134.134	AFC000735	FQPGMQABJNQLLF-UHFFFAOYSA-N	C(CON)C(C(=O)O)N	InChI=1S/C4H10N2O3/c5-3(4(7)8)1-2-9-6/h3H,1-2,5-6H2,(H,7,8)	-1.716	18.314	74	0.75	34	98.57	0.735	0
canavaninosuccinate	56073-32-6		HMDB0012197	25201068	89639	FDB028845		C9H16N4O7	292.246	AFC001307	SGYMGUGIGTWWLU-UHFFFAOYSA-N	C(CONC(=NC(CC(=O)O)C(=O)O)N)C(C(=O)O)N	InChI=1S/C9H16N4O7/c10-4(7(16)17)1-2-20-13-9(11)12-5(8(18)19)3-6(14)15/h4-5H,1-3,10H2,(H,14,15)(H,16,17)(H,18,19)(H3,11,12,13)	-2.396	36.523	359	0.556	86	197.56	0.676	1
carbamoyl-phosphate	590-55-6	C00169	HMDB0001096	278	17672	FDB022424		CH4NO5P	141.02	AFC000049	FFQKYPRQEYGKAF-UHFFFAOYSA-N	C(=O)(N)OP(=O)(O)O	InChI=1S/CH4NO5P/c2-1(3)7-8(4,5)6/h(H2,2,3)(H2,4,5,6)	-1.408	13.167	45	0	34	119.66	0.849	0
carboxyaminoimidazole ribotide	6001-14-5	C04751	HMDB0006273	165388	28413	FDB023871		C9H14N3O9P	339.196	AFC000590	XFVULMDJZXYMSG-UHFFFAOYSA-N	C(C1C(C(C(N2C=NC(=C2N)C(=O)O)O1)O)O)OP(=O)(O)O	InChI=1S/C9H14N3O9P/c10-7-4(9(15)16)11-2-12(7)8-6(14)5(13)3(21-8)1-20-22(17,18)19/h2-3,5-6,8,13-14H,1,10H2,(H,15,16)(H2,17,18,19)	-3.858	39.323	379	0.556	116	205.18	0.605	2
carnitine	406-76-8	C00487		288	17126	FDB000571		C7H15NO3	161.199	AFC001857	PHIQHXFUZVPYII-UHFFFAOYSA-N	C[N+](C)(C)CC(CC(=O)[O-])O	InChI=1S/C7H15NO3/c1-8(2,3)5-6(9)4-7(10)11/h6,9H,4-5H2,1-3H3	-2.519	25.828	94	0.857	48	60.36	0.375	0
catalposide	6736-85-2	C09775		93039	3465			C22H26O12	482.436	AFC000491	UXSACQOOWZMGSE-UHFFFAOYSA-N	C1=C(C=CC(=C1)O)C(=O)OC2C3C=COC(C3C4(CO)C2O4)OC5C(C(C(C(CO)O5)O)O)O	InChI=1S/C22H26O12/c23-7-12-14(26)15(27)16(28)21(31-12)33-20-13-11(5-6-30-20)17(18-22(13,8-24)34-18)32-19(29)9-1-3-10(25)4-2-9/h1-6,11-18,20-21,23-28H,7-8H2	-2.753	65.681	893	0.591	192	187.9	0.39	2
catechol	120-80-9	C00090	HMDB0000957	289	18135	FDB001512		C6H6O2	110.111	AFC000054	YCIMNLLNPGFGHC-UHFFFAOYSA-N	C1=CC(=C(C=C1)O)O	InChI=1S/C6H6O2/c7-5-3-1-2-4-6(5)8/h1-4,7-8H	0.277	16.165	54	0	36	40.46	0.368	0
CDP-choline	987-78-0	C00307	HMDB0001413	13804	49086	FDB022608		C14H26N4O11P2	488.325	AFC000365	RZZPDXZPRHQOCG-UHFFFAOYSA-N	C[N+](C)(C)CCOP(=O)([O-])OP(=O)(O)OCC1C(C(C(N2C=CC(=NC2=O)N)O1)O)O	InChI=1S/C14H26N4O11P2/c1-18(2,3)6-7-26-30(22,23)29-31(24,25)27-8-9-11(19)12(20)13(28-9)17-5-4-10(15)16-14(17)21/h4-5,9,11-13,19-20H,6-8H2,1-3H3,(H3-,15,16,21,22,23,24,25)	-5.158	62.459	824	0.714	162	233.12	0.478	1
CDP-ethanolamine	3036-18-8	C00570	HMDB0001564	123727	16732	FDB022691		C11H20N4O11P2	446.245	AFC000539	WVIMUEUQJFPNDK-UHFFFAOYSA-N	C1=CN(C2C(C(C(COP(=O)(O)OP(=O)(O)OCCN)O2)O)O)C(=O)N=C1N	InChI=1S/C11H20N4O11P2/c12-2-4-23-27(19,20)26-28(21,22)24-5-6-8(16)9(17)10(25-6)15-3-1-7(13)14-11(15)18/h1,3,6,8-10,16-17H,2,4-5,12H2,(H,19,20)(H,21,22)(H2,13,14,18)	-4.437	53.178	690	0.636	144	256.31	0.575	2
cellulase	61788-77-0	D03434		440950	41753	FDB001196		C18H32O16	504.438	AFC000690	FYGDTMLNYKFZSV-UHFFFAOYSA-N	C(C1C(C(C(C(O1)OC2C(CO)OC(C(C2O)O)OC3C(CO)OC(C(C3O)O)O)O)O)O)O	InChI=1S/C18H32O16/c19-1-4-7(22)8(23)12(27)17(31-4)34-15-6(3-21)32-18(13(28)10(15)25)33-14-5(2-20)30-16(29)11(26)9(14)24/h4-29H,1-3H2	-6.007	65.849	820	1	178	268.68	0.533	3
cellulose	9004-34-6	C00760	HMDB0033368	16211032	156274	FDB011396		C12H22O11	342.297	AFC000244	GUBGYTABKSRVRQ-UHFFFAOYSA-N	C(C1C(C(C(C(O1)OC2C(CO)OC(C(C2O)O)O)O)O)O)O	InChI=1S/C12H22O11/c13-1-3-5(15)6(16)9(19)12(22-3)23-10-4(2-14)21-11(20)8(18)7(10)17/h3-20H,1-2H2	-4.26	44.611	372	1	118	189.53	0.554	2
chenodeoxycholoyl-CoA		C05337	HMDB0006292	11966205	28701	FDB023880		C45H74N7O19P3S	1142.09	AFC001187	IIWDDMINEZBCTG-UHFFFAOYSA-N	CC(CCC(=O)SCCNC(=O)CCNC(=O)C(C(C)(C)COP(=O)(O)OP(=O)(O)OCC1C(C(C(N2C=NC3=C2N=CN=C3N)O1)O)OP(=O)(O)O)O)C4CCC5C6C(CCC45C)C7(C)CCC(CC7CC6O)O	InChI=1S/C45H74N7O19P3S/c1-24(27-7-8-28-34-29(11-14-45(27,28)5)44(4)13-10-26(53)18-25(44)19-30(34)54)6-9-33(56)75-17-16-47-32(55)12-15-48-41(59)38(58)43(2,3)21-68-74(65,66)71-73(63,64)67-20-31-37(70-72(60,61)62)36(57)42(69-31)52-23-51-35-39(46)49-22-50-40(35)52/h22-31,34,36-38,42,53-54,57-58H,6-21H2,1-5H3,(H,47,55)(H,48,59)(H,63,64)(H,65,66)(H2,46,49,50)(H2,60,61,62)	-1.196	165.271	5005	0.822	412	455.54	0.399	4
chitotriose	41708-93-4		HMDB0006578	90472500	84373	FDB023980		C18H35N3O13	501.484	AFC001482	HBAVVSYNWHLVDB-UHFFFAOYSA-N	C(=O)C(C(C(C(CO)O)OC1C(C(C(C(CO)O1)OC2C(C(C(C(CO)O2)O)O)N)O)N)O)N	InChI=1S/C18H35N3O13/c19-5(1-22)11(27)15(6(26)2-23)33-18-10(21)14(30)16(8(4-25)32-18)34-17-9(20)13(29)12(28)7(3-24)31-17/h1,5-18,23-30H,2-4,19-21H2	-7.047	68.744	793	0.944	170	293.89	0.586	4
chlorogenic acid	327-97-9	C00852	HMDB0003164	1794427	16112	FDB031207		C16H18O9	354.309	AFC000848	CWVRJTMFETXNAD-UHFFFAOYSA-N	C1=C(C=CC(=O)OC2CC(CC(C2O)O)(C(=O)O)O)C=C(C(=C1)O)O	InChI=1S/C16H18O9/c17-9-3-1-8(5-10(9)18)2-4-13(20)25-12-7-16(24,15(22)23)6-11(19)14(12)21/h1-5,11-12,14,17-19,21,24H,6-7H2,(H,22,23)	-1.474	47.38	533	0.375	128	164.75	0.465	1
chlorophyll a	479-61-8	C05306	HMDB0038578	12085802	18230	FDB017968		[C55H72N4O5]2-	869.186	AFC001193	QBDWVXAZHXTFSD-UHFFFAOYSA-M	C=CC1=C2C=C3C(=C(CC)C(=N3)C=C4C(=C5C(=C(C(C5=O)C(=O)OC)C6=NC(=CC(=C1C)[N-]2)C(C)C6CCC(=O)OCC=C(C)CCCC(C)CCCC(C)CCCC(C)C)[N-]4)C)C	InChI=1S/C55H73N4O5/c1-13-39-35(8)42-28-44-37(10)41(24-25-48(60)64-27-26-34(7)23-17-22-33(6)21-16-20-32(5)19-15-18-31(3)4)52(58-44)50-51(55(62)63-12)54(61)49-38(11)45(59-53(49)50)30-47-40(14-2)36(9)43(57-47)29-46(39)56-42/h13,26,28-33,37,41,51H,1,14-25,27H2,2-12H3,(H-,56,57,58,59,61)/q-1/p-1	11.509	153.219	3264	0.545	336	94.39	0.109	3
chlorophyll b	519-62-0	C05307	HMDB0031146	11593175	27888	FDB003158		[C55H70N4O6]2-	883.17	AFC001166	VQSZPIQKMYIYMH-UHFFFAOYSA-M	C=CC1=C2C=C3C(=C(CC)C(=N3)C=C4C(=C5C(=C(C(C5=O)C(=O)OC)C6=NC(=CC(=C1C)[N-]2)C(C)C6CCC(=O)OCC=C(C)CCCC(C)CCCC(C)CCCC(C)C)[N-]4)C)C=O	InChI=1S/C55H71N4O6/c1-12-38-35(8)42-27-43-36(9)40(23-24-48(61)65-26-25-34(7)22-16-21-33(6)20-15-19-32(5)18-14-17-31(3)4)52(58-43)50-51(55(63)64-11)54(62)49-37(10)44(59-53(49)50)28-46-39(13-2)41(30-60)47(57-46)29-45(38)56-42/h12,25,27-33,36,40,51H,1,13-24,26H2,2-11H3,(H-,56,57,58,59,60,62)/q-1/p-1	10.675	152.688	3364	0.527	340	111.46	0.126	3
chlorophyllide a	14897-06-4	C02139		439664	16900	FDB030722		[C35H34N4O5]2-	590.67	AFC000693	AXNGBNDQHOVSCG-UHFFFAOYSA-L	C=CC1=C2C=C3C(=C(CC)C(=N3)C=C4C(=C5C(=C(C(C5=O)C(=O)OC)C6=NC(=CC(=C1C)[N-]2)C(C)C6CCC(=O)O)[N-]4)C)C	InChI=1S/C35H36N4O5/c1-8-19-15(3)22-12-24-17(5)21(10-11-28(40)41)32(38-24)30-31(35(43)44-7)34(42)29-18(6)25(39-33(29)30)14-27-20(9-2)16(4)23(37-27)13-26(19)36-22/h8,12-14,17,21,31H,1,9-11H2,2-7H3,(H3,36,37,38,39,40,41,42)/p-2	3.563	92.681	1075	0.343	248	105.39	0.179	1
chlorophyllide b	14428-12-7	C16541		15775275	38209	FDB030723		[C35H32N4O6]2-	604.653	AFC001236	BHTDQXWZQVYFIH-UHFFFAOYSA-L	C=CC1=C2C=C3C(=C(CC)C(=N3)C=C4C(=C5C(=C(C(C5=O)C(=O)OC)C6=NC(=CC(=C1C)[N-]2)C(C)C6CCC(=O)O)[N-]4)C)C=O	InChI=1S/C35H34N4O6/c1-7-18-15(3)22-11-23-16(4)20(9-10-28(41)42)32(38-23)30-31(35(44)45-6)34(43)29-17(5)24(39-33(29)30)12-26-19(8-2)21(14-40)27(37-26)13-25(18)36-22/h7,11-14,16,20,31H,1,8-10H2,2-6H3,(H3,36,37,38,39,40,41,42,43)/p-2	2.728	92.149	1119	0.314	252	122.46	0.203	1
cholest-4-en-3-one	601-57-0	C00599	HMDB0000921	91477	16175	FDB022319	LMST01010015	C27H44O	384.639	AFC000471	NYOXRYYXRWJDKP-UHFFFAOYSA-N	CC(C)CCCC(C)C1CCC2C3CCC4=CC(=O)CCC4(C)C3CCC12C	InChI=1S/C27H44O/c1-18(2)7-6-8-19(3)23-11-12-24-22-10-9-20-17-21(28)13-15-26(20,4)25(22)14-16-27(23,24)5/h17-19,22-25H,6-16H2,1-5H3	7.472	77.661	669	0.889	158	17.07	0.044	1
cholest-5-en-3-one	601-54-7			9908107	63906		LMST01010248	C27H44O	384.639	AFC001143	GGCLNOIGPMGLDB-UHFFFAOYSA-N	CC(C)CCCC(C)C1CCC2C3CC=C4CC(=O)CCC4(C)C3CCC12C	InChI=1S/C27H44O/c1-18(2)7-6-8-19(3)23-11-12-24-22-10-9-20-17-21(28)13-15-26(20,4)25(22)14-16-27(23,24)5/h9,18-19,22-25H,6-8,10-17H2,1-5H3	7.05	77.661	669	0.889	158	17.07	0.044	1
cholesterol	57-88-5	C00187	HMDB0000067	5997	16113	FDB013269	LMST01010001	C27H46O	386.655	AFC000227	HVYWMOMLDIMFJA-UHFFFAOYSA-N	CC(C)CCCC(C)C1CCC2C3CC=C4CC(CCC4(C)C3CCC12C)O	InChI=1S/C27H46O/c1-18(2)7-6-8-19(3)23-11-12-24-22-10-9-20-17-21(28)13-15-26(20,4)25(22)14-16-27(23,24)5/h9,18-19,21-25,28H,6-8,10-17H2,1-5H3	7.376	78.994	669	0.926	158	20.23	0.052	1
choline	62-49-7	C00114	HMDB0000097	305	15354	FDB000710		[C5H14NO]+	104.171	AFC000055	OEYIOHPDSNJKLS-UHFFFAOYSA-N	C[N+](C)(C)CCO	InChI=1S/C5H14NO/c1-6(2,3)4-5-7/h7H,4-5H2,1-3H3/q+1	-1.574	20.037	38	1	28	20.23	0.194	0
choloyl-CoA	6050-48-2	C01794	HMDB0001374	644071	15519	FDB022586		C45H74N7O20P3S	1158.09	AFC000826	ZKWNOTQHFKYUNU-UHFFFAOYSA-N	CC(CCC(=O)SCCNC(=O)CCNC(=O)C(C(C)(C)COP(=O)(O)OP(=O)(O)OCC1C(C(C(N2C=NC3=C2N=CN=C3N)O1)O)OP(=O)(O)O)O)C4CCC5C6C(CC(C45C)O)C7(C)CCC(CC7CC6O)O	InChI=1S/C45H74N7O20P3S/c1-23(26-7-8-27-34-28(18-31(55)45(26,27)5)44(4)12-10-25(53)16-24(44)17-29(34)54)6-9-33(57)76-15-14-47-32(56)11-13-48-41(60)38(59)43(2,3)20-69-75(66,67)72-74(64,65)68-19-30-37(71-73(61,62)63)36(58)42(70-30)52-22-51-35-39(46)49-21-50-40(35)52/h21-31,34,36-38,42,53-55,58-59H,6-20H2,1-5H3,(H,47,56)(H,48,60)(H,64,65)(H,66,67)(H2,46,49,50)(H2,61,62,63)	-2.298	166.073	5070	0.822	418	475.77	0.411	4
chorismate	617-12-9	C00251	HMDB0012199	12039	17333	FDB028846		C10H10O6	226.183	AFC000348	WTFXTQVDAKGDEY-UHFFFAOYSA-N	C=C(C(=O)O)OC1C=C(C=CC1O)C(=O)O	InChI=1S/C10H10O6/c1-5(9(12)13)16-8-4-6(10(14)15)2-3-7(8)11/h2-4,7-8,11H,1H2,(H,12,13)(H,14,15)	-0.194	29.08	196	0.2	76	104.06	0.46	0
chrysin	480-40-0	C10028	HMDB0036619	5281607	75095	FDB015535	LMPK12110189	C15H10O4	254.238	AFC001885	RTIXKCRFFJGDFG-UHFFFAOYSA-N	C1=CC=C(C=C1)C2=CC(=O)C3=C(C=C(C=C3O)O)O2	InChI=1S/C15H10O4/c16-10-6-11(17)15-12(18)8-13(19-14(15)7-10)9-4-2-1-3-5-9/h1-8,16-17H	0.446	36.276	295	0	102	66.76	0.263	0
Chrysoeriol 4'-O-beta-D-glucopyranoside				14406834				C22H22O11	462.404	AFC001646	XEZXZKDKCCSHBV-UHFFFAOYSA-N	COC1=C(C=CC(=C1)C2=CC(=O)C3=C(C=C(C=C3O)O)O2)O[C@H]4[C@@H]([C@H]([C@@H]([C@@H](CO)O4)O)O)O	InChI=1S/C22H22O11/c1-30-15-4-9(14-7-12(26)18-11(25)5-10(24)6-16(18)31-14)2-3-13(15)32-22-21(29)20(28)19(27)17(8-23)33-22/h2-7,17,19-25,27-29H,8H2,1H3	-2.707	62.211	840	0.318	178	175.37	0.379	2
Chrysoeriol 7-glucuronide	29741-07-9			14630703		FDB021689		C22H20O12	476.388	AFC001645	VLYLVFHVHHGXHX-UHFFFAOYSA-N	COC1=C(C=CC(=C1)C2=CC(=O)C3=C(C=C(C=C3O)O[C@H]4[C@@H]([C@H]([C@@H]([C@@H](C(=O)O)O4)O)O)O)O2)O	InChI=1S/C22H20O12/c1-31-14-4-8(2-3-10(14)23)13-7-12(25)16-11(24)5-9(6-15(16)33-13)32-22-19(28)17(26)18(27)20(34-22)21(29)30/h2-7,17-20,22-24,26-28H,1H3,(H,29,30)	-2.498	61.68	855	0.273	184	192.44	0.404	2
chrysoeriol C-hexoside				137333728	131761			C27H30O15	594.519	AFC001916	JUYXQAXANUJFHU-UHFFFAOYSA-N	COC1=C(C(=CC(=C1)C2=CC(=O)C3=C(C=C(C(=C3O2)C4C(C(C(C(CO)O4)O)O)O)O)O)C5C(CO)C(C(O)O5)O)O	InChI=1S/C27H30O15/c1-39-15-3-8(2-9(19(15)33)24-10(6-28)20(34)27(38)42-24)14-5-13(32)17-11(30)4-12(31)18(25(17)40-14)26-23(37)22(36)21(35)16(7-29)41-26/h2-5,10,16,20-24,26-31,33-38H,6-7H2,1H3	-4.769	79.554	1071	0.444	232	256.29	0.431	3
cianidanol	154-23-4	C06562	HMDB0002780	9064	15600	FDB002571	LMPK12020001	C15H14O6	290.269	AFC001894	PFTAWBLQPZVEMU-UHFFFAOYSA-N	C1=C(C=C(C(=C1)O)O)[C@@H]2[C@H](CC3=C(C=C(C=C3O)O)O2)O	InChI=1S/C15H14O6/c16-8-4-11(18)9-6-13(20)15(21-14(9)5-8)7-1-2-10(17)12(19)3-7/h1-5,13,15-20H,6H2	-0.678	40.547	353	0.2	114	110.38	0.381	0
cimifugin	37921-38-3	C09000		441960	3701			C16H18O6	306.311	AFC000737	ATDBDSBKYKMRGZ-UHFFFAOYSA-N	CC(C)(C1CC2=C(C=C3C(=C2OC)C(=O)C=C(CO)O3)O1)O	InChI=1S/C16H18O6/c1-16(2,19)13-5-9-11(22-13)6-12-14(15(9)20-3)10(18)4-8(7-17)21-12/h4,6,13,17,19H,5,7H2,1-3H3	-0.975	44.974	356	0.438	122	85.22	0.278	0
cinnamaldehyde	104-55-2	C00903	HMDB0003441	637511	142921	FDB030727		C9H8O	132.16	AFC000804	KJPRLNWUNMBNBZ-UHFFFAOYSA-N	C1=CC=C(C=C1)C=CC=O	InChI=1S/C9H8O/c10-8-4-7-9-5-2-1-3-6-9/h1-8H	1.483	21.976	107	0	42	17.07	0.129	0
cinnamic acid	140-10-3	C00423	HMDB0000930	444539	27386	FDB012052		C9H8O2	148.159	AFC000765	WBYWAXJHAXSJNI-UHFFFAOYSA-N	C1=CC=C(C=C1)C=CC(=O)O	InChI=1S/C9H8O2/c10-9(11)7-6-8-4-2-1-3-5-8/h1-7H,(H,10,11)	1.436	22.778	120	0	48	37.3	0.252	0
cinnamoyltyramine	20384-14-9			5315911		FDB030728		C17H17NO2	267.323	AFC000997	KGOYCHSKGXJDND-UHFFFAOYSA-N	C1=CC=C(C=C1)C=CC(=O)NCCC2=CC=C(C=C2)O	InChI=1S/C17H17NO2/c19-16-9-6-15(7-10-16)12-13-18-17(20)11-8-14-4-2-1-3-5-14/h1-11,19H,12-13H2,(H,18,20)	1.915	43.959	455	0.118	94	49.33	0.185	0
cinnamyl alcohol	104-54-1	C02394	HMDB0029698	5315892	17177	FDB000887		C9H10O	134.175	AFC000996	OOCCDEMITAIZTP-UHFFFAOYSA-N	C1=CC=C(C=C1)C=CCO	InChI=1S/C9H10O/c10-8-4-7-9-5-2-1-3-6-9/h1-7,10H,8H2	1.227	23.31	107	0.111	42	20.23	0.151	0
cis-2-penten-1-ol	1575-95-0		HMDB0031604	5364919	145352	FDB008239	LMFA05000110	C5H10O	86.1325	AFC001024	BTSIZIIPFNVMHF-UHFFFAOYSA-N	CCC=CCO	InChI=1S/C5H10O/c1-2-3-4-5-6/h3-4,6H,2,5H2,1H3	1.117	16.27	38	0.6	18	20.23	0.235	0
cis-3-hexen-1-ol	928-96-1	C08492	HMDB0030003	5281167	28857	FDB008091	LMFA05000059	C6H12O	100.159	AFC000927	UFLHIIWVXFIJGU-UHFFFAOYSA-N	CCC=CCCO	InChI=1S/C6H12O/c1-2-3-4-5-6-7/h3-4,7H,2,5-6H2,1H3	1.439	19.364	54	0.667	22	20.23	0.202	0
cis-3-hexenal	6789-80-6	C16310	HMDB0031498	643941	23292	FDB008085	LMFA06000110	C6H10O	98.1432	AFC000386	GXANMBISFKBPEX-UHFFFAOYSA-N	CCC=CCC=O	InChI=1S/C6H10O/c1-2-3-4-5-6-7/h3-4,6H,2,5H2,1H3	1.408	18.03	54	0.5	22	17.07	0.174	0
cis-3-hexenyl acetate		C19757	HMDB0040215	5363388	61316	FDB019927	LMFA07010181	C8H14O2	142.196	AFC001830	NPFVOOAXDOBMCE-UHFFFAOYSA-N	CCC=CCCOC(=O)C	InChI=1S/C8H14O2/c1-3-4-5-6-7-10-8(2)9/h4-5H,3,6-7H2,1-2H3	1.818	25.019	111	0.625	36	26.3	0.185	0
cis-3-nonen-1-ol	10340-23-5		HMDB0030959	5364631		FDB002938	LMFA05000134	C9H18O	142.239	AFC001022	IFTBJDZSLBRRMC-UHFFFAOYSA-N	CCCCCC=CCCO	InChI=1S/C9H18O/c1-2-3-4-5-6-7-8-9-10/h6-7,10H,2-5,8-9H2,1H3	2.807	28.644	122	0.778	34	20.23	0.142	0
cis-9-heptadecenoic acid	1981-50-6		HMDB0062437	5282748	84328		LMFA01030060	C17H32O2	268.435	AFC001939	QSBYPNXLFMSGKH-UHFFFAOYSA-N	CCCCCCC/C=C\CCCCCCCC(=O)O	InChI=1S/C17H32O2/c1-2-3-4-5-6-7-8-9-10-11-12-13-14-15-16-17(18)19/h8-9H,2-7,10-16H2,1H3,(H,18,19)	6.379	52.861	467	0.824	72	37.3	0.139	2
cis-aconitic acid	585-84-2	C00417	HMDB0000072	643757	32805	FDB008306		C6H6O6	174.108	AFC000819	GTZCVFVGUGFEME-UHFFFAOYSA-N	C(=C(CC(=O)O)C(=O)O)C(=O)O	InChI=1S/C6H6O6/c7-4(8)1-3(6(11)12)2-5(9)10/h1H,2H2,(H,7,8)(H,9,10)(H,11,12)	-0.412	19.373	101	0.167	50	111.9	0.643	0
cis-caffeate			HMDB0003501	54681167	58129	FDB002558		[C9H7O4]-	179.15	AFC001448	QAIPRVGONGVQAS-UHFFFAOYSA-M	C1=C(C=CC(=O)O)C=C(C(=C1)[O-])O	InChI=1S/C9H8O4/c10-7-3-1-6(5-8(7)11)2-4-9(12)13/h1-5,10-11H,(H,12,13)/p-1	-0.368	23.716	157	0	60	80.59	0.45	0
cis-eicosadienoic acid								C20H36O2	308.499	AFC001538	LNAVIIOBBICBIS-UHFFFAOYSA-N	CCCCCCCCCCCCCCC/C=C/C=C\C(=O)O	InChI=1S/C20H36O2/c1-2-3-4-5-6-7-8-9-10-11-12-13-14-15-16-17-18-19-20(21)22/h16-19H,2-15H2,1H3,(H,21,22)	7.725	60.809	639	0.75	84	37.3	0.121	2
cis-zeatin	32771-64-5	C15545		688597	46570	FDB028850		C10H13N5O	219.244	AFC000795	UZKQTCBAMSWPJD-UHFFFAOYSA-N	CC(=CCNC1=C2C(=NC=N1)N=CN2)CO	InChI=1S/C10H13N5O/c1-7(4-16)2-3-11-9-8-10(13-5-12-8)15-6-14-9/h2,5-6,16H,3-4H2,1H3,(H2,11,12,13,14,15)	-0.562	32.57	249	0.3	78	81.37	0.371	0
cis-zeatin riboside	15896-46-5	C16449		13935024	20838	FDB030733		C15H21N5O5	351.358	AFC001099	GOSWTRUMMSCNCW-UHFFFAOYSA-N	CC(=CCNC1=NC=NC2=C1N=CN2C3C(C(C(CO)O3)O)O)CO	InChI=1S/C15H21N5O5/c1-8(4-21)2-3-16-13-10-14(18-6-17-13)20(7-19-10)15-12(24)11(23)9(5-22)25-15/h2,6-7,9,11-12,15,21-24H,3-5H2,1H3,(H,16,17,18)	-2.195	49.913	553	0.533	130	142.5	0.406	0
cis-zeatin riboside monophosphate	125225-71-0	C16441		23724752	80493	FDB030734		C15H22N5O8P	431.338	AFC001165	IRILMCCKFANGJQ-UHFFFAOYSA-N	CC(=CCNC1=NC=NC2=C1N=CN2C3C(C(C(COP(=O)(O)O)O3)O)O)CO	InChI=1S/C15H22N5O8P/c1-8(4-21)2-3-16-13-10-14(18-6-17-13)20(7-19-10)15-12(23)11(22)9(28-15)5-27-29(24,25)26/h2,6-7,9,11-12,15,21-23H,3-5H2,1H3,(H,16,17,18)(H2,24,25,26)	-3.005	56.615	723	0.533	152	198.84	0.461	2
cis-zeatin-O-glucoside		C15546	HMDB0012203	5280589	29043	FDB028849		C16H23N5O6	381.384	AFC000898	UUPDCCPAOMDMPT-UHFFFAOYSA-N	CC(=CCNC1=C2C(=NC=N1)N=CN2)COC3C(C(C(C(CO)O3)O)O)O	InChI=1S/C16H23N5O6/c1-8(2-3-17-14-10-15(19-6-18-10)21-7-20-14)5-26-16-13(25)12(24)11(23)9(4-22)27-16/h2,6-7,9,11-13,16,22-25H,3-5H2,1H3,(H2,17,18,19,20,21)	-2.309	53.808	660	0.563	138	160.52	0.421	2
citral	5392-40-5	C01499	HMDB0035078	638011	16980	FDB013702	LMPR0102010003	C10H16O	152.234	AFC000810	WTEVQBCEXWBHNA-UHFFFAOYSA-N	CC(=CCCC(=CC=O)C)C	InChI=1S/C10H16O/c1-9(2)5-4-6-10(3)7-8-11/h5,7-8H,4,6H2,1-3H3	3.19	29.071	122	0.5	42	17.07	0.112	0
citramalate	597-44-4	C00815	HMDB0000426	1081	15584	FDB002815		C5H8O5	148.114	AFC000172	XFTRTWQBIOMVPK-UHFFFAOYSA-N	CC(CC(=O)O)(C(=O)O)O	InChI=1S/C5H8O5/c1-5(10,4(8)9)2-3(6)7/h10H,2H2,1H3,(H,6,7)(H,8,9)	-0.751	18.144	70	0.6	44	94.83	0.641	0
citrate	77-92-9	C00158	HMDB0000094	311	30769	FDB012586		C6H8O7	192.124	AFC000056	KRKNYBCHXYNGOX-UHFFFAOYSA-N	C(C(=O)O)C(CC(=O)O)(C(=O)O)O	InChI=1S/C6H8O7/c7-3(8)1-6(13,5(11)12)2-4(9)10/h13H,1-2H2,(H,7,8)(H,9,10)(H,11,12)	-1.395	21.508	108	0.5	58	132.13	0.688	0
citrulline	372-75-8	C00327	HMDB0000904	9750	16349	FDB011841		C6H13N3O3	175.186	AFC000322	RHGKLRLOHDJJDR-UHFFFAOYSA-N	C(CC(C(=O)O)N)CNC(=O)N	InChI=1S/C6H13N3O3/c7-4(5(10)11)2-1-3-9-6(8)12/h4H,1-3,7H2,(H,10,11)(H3,8,9,12)	-1.325	24.934	139	0.667	48	118.44	0.676	0
citrullol						FDB004930		C6H13N3O3	175.186	AFC000322	RHGKLRLOHDJJDR-UHFFFAOYSA-N	C(CC(C(=O)O)N)CNC(=O)N	InChI=1S/C6H13N3O3/c7-4(5(10)11)2-1-3-9-6(8)12/h4H,1-3,7H2,(H,10,11)(H3,8,9,12)	-1.325	24.934	139	0.667	48	118.44	0.676	0
clerosterol	2364-23-0		HMDB0034197	5283638	166817	FDB012494	LMST01040124	C29H48O	412.692	AFC000981	GHGKPLPBPGYSOO-UHFFFAOYSA-N	CCC(CCC(C)C1CCC2C3CC=C4CC(CCC4(C)C3CCC12C)O)C(=C)C	InChI=1S/C29H48O/c1-7-21(19(2)3)9-8-20(4)25-12-13-26-24-11-10-22-18-23(30)14-16-28(22,5)27(24)15-17-29(25,26)6/h10,20-21,23-27,30H,2,7-9,11-18H2,1,3-6H3	7.888	83.848	725	0.862	168	20.23	0.049	1
CMP-3-deoxy-D-manno-octulosonate		C04121		445888	86284	FDB030737		C17H26N3O15P	543.374	AFC000777	YWWJKULNWGRYAS-UHFFFAOYSA-N	C1=CN(C2C(C(C(COP(=O)(O)OC3(CC(C(C(C(CO)O)O3)O)O)C(=O)O)O2)O)O)C(=O)N=C1N	InChI=1S/C17H26N3O15P/c18-9-1-2-20(16(29)19-9)14-12(26)11(25)8(33-14)5-32-36(30,31)35-17(15(27)28)3-6(22)10(24)13(34-17)7(23)4-21/h1-2,6-8,10-14,21-26H,3-5H2,(H,27,28)(H,30,31)(H2,18,19,29)	-5.049	66.217	988	0.706	192	301.4	0.555	3
CMP-N-acetylneuraminate	3063-71-6	C00128	HMDB0001176	448209	16556	FDB022466		C20H31N4O16P	614.452	AFC000791	TXCIAUNLDRJGJZ-UHFFFAOYSA-N	CC(=O)NC1C(CC(C(=O)O)(OC1C(C(CO)O)O)OP(=O)(O)OCC2C(C(C(N3C=CC(=NC3=O)N)O2)O)O)O	InChI=1S/C20H31N4O16P/c1-7(26)22-12-8(27)4-20(18(32)33,39-16(12)13(29)9(28)5-25)40-41(35,36)37-6-10-14(30)15(31)17(38-10)24-3-2-11(21)23-19(24)34/h2-3,8-10,12-17,25,27-31H,4-6H2,1H3,(H,22,26)(H,32,33)(H,35,36)(H2,21,23,34)	-5.828	76.733	1194	0.7	216	330.5	0.538	4
codisterol				13833114		FDB004931	LMST01031028	C28H46O	398.665	AFC001209	IBAFJAONJZIYIT-UHFFFAOYSA-N	C=C(C)C(C)CCC(C)C1CCC2C3CC=C4CC(CCC4(C)C3CCC12C)O	InChI=1S/C28H46O/c1-18(2)19(3)7-8-20(4)24-11-12-25-23-10-9-21-17-22(29)13-15-27(21,5)26(23)14-16-28(24,25)6/h9,19-20,22-26,29H,1,7-8,10-17H2,2-6H3	7.432	80.754	696	0.857	164	20.23	0.051	1
coenzyme F420	64885-97-8	C00876		123996	16848			C29H36N5O18P	773.594	AFC000543	XXFFZHQKSZLLIT-UHFFFAOYSA-N	CC(C(=O)NC(CCC(=O)NC(CCC(=O)O)C(=O)O)C(=O)O)OP(=O)(O)OCC(C(C(CN1C2=CC(=O)C=CC2=CC3=C1NC(=O)NC3=O)O)O)O	InChI=1S/C29H36N5O18P/c1-12(25(42)31-17(28(46)47)4-6-21(38)30-16(27(44)45)5-7-22(39)40)52-53(49,50)51-11-20(37)23(41)19(36)10-34-18-9-14(35)3-2-13(18)8-15-24(34)32-29(48)33-26(15)43/h2-3,8-9,12,16-17,19-20,23,36-37,41H,4-7,10-11H2,1H3,(H,30,38)(H,31,42)(H,39,40)(H,44,45)(H,46,47)(H,49,50)(H2,32,33,43,48)	-3.836	98.611	2194	0.448	268	374.87	0.485	4
coenzyme Q8	2394-68-5	C17569	HMDB0006709	5283546	61683	FDB024036	LMPR02010005	C49H74O4	727.111	AFC000979	ICFIZJQGJAJRSU-UHFFFAOYSA-N	CC(=CCCC(=CCCC(=CCCC(=CCCC(=CCCC(=CCCC(=CCCC(=CCC1=C(C)C(=O)C(=C(C1=O)OC)OC)C)C)C)C)C)C)C)C	InChI=1S/C49H74O4/c1-36(2)20-13-21-37(3)22-14-23-38(4)24-15-25-39(5)26-16-27-40(6)28-17-29-41(7)30-18-31-42(8)32-19-33-43(9)34-35-45-44(10)46(50)48(52-11)49(53-12)47(45)51/h20,22,24,26,28,30,32,34H,13-19,21,23,25,27,29,31,33,35H2,1-12H3	14.46	138.791	3036	0.551	240	52.6	0.072	3
coniferaldehyde	458-36-6	C02666	HMDB0141782	5280536	16547	FDB001513		C10H10O3	178.185	AFC000891	DKZBBWMURDFHNE-UHFFFAOYSA-N	COC1=CC(=CC=C1O)C=CC=O	InChI=1S/C10H10O3/c1-13-10-7-8(3-2-6-11)4-5-9(10)12/h2-7,12H,1H3	0.422	26.674	157	0.1	58	46.53	0.261	0
coniferin	531-29-3	C00761	HMDB0013682	5280372	16220	FDB015497		C16H22O8	342.342	AFC000873	SFLMUHDGSQZDOW-UHFFFAOYSA-N	COC1=CC(=CC=C1OC2C(C(C(C(CO)O2)O)O)O)C=CCO	InChI=1S/C16H22O8/c1-22-11-7-9(3-2-6-17)4-5-10(11)23-16-15(21)14(20)13(19)12(8-18)24-16/h2-5,7,12-21H,6,8H2,1H3	-1.926	49.245	487	0.5	118	128.84	0.377	0
coniferyl alcohol	458-35-5	C00590	HMDB0012915	1549095	17745	FDB015496		C10H12O3	180.201	AFC000840	JMFRWRFFLBVWSI-UHFFFAOYSA-N	COC1=CC(=CC=C1O)C=CCO	InChI=1S/C10H12O3/c1-13-10-7-8(3-2-6-11)4-5-9(10)12/h2-5,7,11-12H,6H2,1H3	0.165	28.008	157	0.2	58	49.69	0.276	0
coproporphyrinogen III	2624-63-7	C03263	HMDB0001261	321	15439	FDB022518		C36H44N4O8	660.758	AFC000058	NIUVHXTXUXOFEB-UHFFFAOYSA-N	CC1=C2CC3=C(C)C(=C(CC4=C(CCC(=O)O)C(=C(CC5=C(CCC(=O)O)C(=C(CC(=C1CCC(=O)O)N2)N5)C)N4)C)N3)CCC(=O)O	InChI=1S/C36H44N4O8/c1-17-21(5-9-33(41)42)29-14-27-19(3)22(6-10-34(43)44)30(39-27)15-28-20(4)24(8-12-36(47)48)32(40-28)16-31-23(7-11-35(45)46)18(2)26(38-31)13-25(17)37-29/h37-40H,5-16H2,1-4H3,(H,41,42)(H,43,44)(H,45,46)(H,47,48)	0.744	103.515	1354	0.444	256	197.32	0.299	4
Corbisterol	481-19-6		HMDB0033825	131751494	166889	FDB011990	LMST01040203	C29H46O	410.676	AFC001938	OQMZNAMGEHIHNN-UHFFFAOYSA-N	CC[C@H](/C=C/[C@@H](C)[C@H]1CC[C@H]2C3=CC=C4C[C@H](CC[C@]4(C)[C@H]3CC[C@]12C)O)C(C)C	InChI=1S/C29H46O/c1-7-21(19(2)3)9-8-20(4)25-12-13-26-24-11-10-22-18-23(30)14-16-28(22,5)27(24)15-17-29(25,26)6/h8-11,19-21,23,25-27,30H,7,12-18H2,1-6H3	7.39	82.514	725	0.793	168	20.23	0.049	1
cotinine	486-56-6		HMDB0001046	854019	68641	FDB004716		C10H12N2O	176.215	AFC000837	UIKROCXWUNQSPJ-UHFFFAOYSA-N	CN1C(CCC1=O)C2=CC=CN=C2	InChI=1S/C10H12N2O/c1-12-9(4-5-10(12)13)8-3-2-6-11-7-8/h2-3,6-7,9H,4-5H2,1H3	-0.042	28.604	150	0.4	66	32.67	0.186	0
coumaraldehyde	20711-53-9	C05608	HMDB0040986	641301	28353	FDB020845		C9H8O2	148.159	AFC000816	CJXMVKYNVIGQBS-UHFFFAOYSA-N	C(=CC1=CC=C(C=C1)O)C=O	InChI=1S/C9H8O2/c10-7-1-2-8-3-5-9(11)6-4-8/h1-7,11H	0.92	22.778	129	0	48	37.3	0.252	0
coumarin	91-64-5	C05851	HMDB0001218	323	28794	FDB011938		C9H6O2	146.143	AFC000059	ZYGHJZDHTFUPRJ-UHFFFAOYSA-N	C1=CC2=C(C=C1)OC(=O)C=C2	InChI=1S/C9H6O2/c10-9-6-5-7-3-1-2-4-8(7)11-9/h1-6H	1.138	21.445	108	0	56	26.3	0.18	0
crepenynate	2277-31-8	C07289		5461139	14030		LMFA01030742	[C18H29O2]-	277.422	AFC001063	SAOSKFBYQJLQOS-UHFFFAOYSA-M	CCCCCC#CCC=CCCCCCCCC(=O)[O-]	InChI=1S/C18H30O2/c1-2-3-4-5-6-7-8-9-10-11-12-13-14-15-16-17-18(19)20/h9-10H,2-5,8,11-17H2,1H3,(H,19,20)/p-1	5.836	52.621	521	0.722	76	40.13	0.145	2
crinosterol	17472-78-5	C08813		5283660	155905	FDB030745	LMST01030114	C28H46O	398.665	AFC000940	OILXMJHPFNGGTO-UHFFFAOYSA-N	CC(C)C(C)C=CC(C)C1CCC2C3CC=C4CC(CCC4(C)C3CCC12C)O	InChI=1S/C28H46O/c1-18(2)19(3)7-8-20(4)24-11-12-25-23-10-9-21-17-22(29)13-15-27(21,5)26(23)14-16-28(24,25)6/h7-9,18-20,22-26,29H,10-17H2,1-6H3	7.183	80.754	696	0.857	164	20.23	0.051	1
crotonoyl-CoA	992-67-6	C00877	HMDB0002009	5497143	15473	FDB022792	LMFA07050307	C25H40N7O17P3S	835.61	AFC001077	KFWWCMJSYSSPSK-UHFFFAOYSA-N	CC=CC(=O)SCCNC(=O)CCNC(=O)C(C(C)(C)COP(=O)(O)OP(=O)(O)OCC1C(C(C(N2C=NC3=C2N=CN=C3N)O1)O)OP(=O)(O)O)O	InChI=1S/C25H40N7O17P3S/c1-4-5-16(34)53-9-8-27-15(33)6-7-28-23(37)20(36)25(2,3)11-46-52(43,44)49-51(41,42)45-10-14-19(48-50(38,39)40)18(35)24(47-14)32-13-31-17-21(26)29-12-30-22(17)32/h4-5,12-14,18-20,24,35-36H,6-11H2,1-3H3,(H,27,33)(H,28,37)(H,41,42)(H,43,44)(H2,26,29,30)(H2,38,39,40)	-4.316	105.796	2454	0.6	272	415.08	0.497	4
cucurbitacin A	6040-19-3	C08790		5281315	3940	FDB005284	LMST01010103	C32H46O9	574.703	AFC000936	IHTCCHVMPGDDSL-UHFFFAOYSA-N	CC(=O)OC(C)(C)C=CC(=O)C(C)(C1C(CC2(C)C3CC=C4C(CC(C(=O)C4(C)C)O)C3(CO)C(=O)CC12C)O)O	InChI=1S/C32H46O9/c1-17(34)41-27(2,3)12-11-23(37)31(8,40)25-21(36)14-29(6)22-10-9-18-19(13-20(35)26(39)28(18,4)5)32(22,16-33)24(38)15-30(25,29)7/h9,11-12,19-22,25,33,35-36,40H,10,13-16H2,1-8H3	0.909	94.21	1099	0.75	238	158.43	0.276	1
cucurbitacin B	6199-67-3	C08794	HMDB0034927	5281316	3941	FDB013515	LMST01010104	C32H46O8	558.704	AFC000937	IXQKXEUSCPEQRD-UHFFFAOYSA-N	CC(=O)OC(C)(C)C=CC(=O)C(C)(C1C(CC2(C)C3CC=C4C(CC(C(=O)C4(C)C)O)C3(C)C(=O)CC12C)O)O	InChI=1S/C32H46O8/c1-17(33)40-27(2,3)13-12-23(36)32(9,39)25-21(35)15-29(6)22-11-10-18-19(14-20(34)26(38)28(18,4)5)31(22,8)24(37)16-30(25,29)7/h10,12-13,19-22,25,34-35,39H,11,14-16H2,1-9H3	2	93.408	1072	0.75	234	138.2	0.248	1
cucurbitacin B-Glu								C38H56O13	720.845	AFC001650	PQOVWWZVVIGRPP-UHFFFAOYSA-N	CC(=O)OC(C)(C)C=CC(=O)C(C)(C1C(CC2(C)C3CC=C4C(CC(C(=O)C4(C)C)OC5C(C(C(C(CO)O5)O)O)O)C3(C)C(=O)CC12C)O)O	InChI=1S/C38H56O13/c1-18(40)51-33(2,3)13-12-25(42)38(9,48)30-21(41)15-35(6)24-11-10-19-20(37(24,8)26(43)16-36(30,35)7)14-22(31(47)34(19,4)5)49-32-29(46)28(45)27(44)23(17-39)50-32/h10,12-13,20-24,27-30,32,39,41,44-46,48H,11,14-17H2,1-9H3	0.253	114.646	1686	0.789	294	217.35	0.302	3
cucurbitacin D								C30H44O7	516.667	AFC001651	SRPHMISUTWFFKJ-UHFFFAOYSA-N	CC(C)(/C=C/C(=O)[C@@](C)([C@H]1[C@@H](C[C@@]2(C)[C@@H]3CC=C4[C@@H](C[C@@H](C(=O)C4(C)C)O)[C@]3(C)C(=O)C[C@]12C)O)O)O	InChI=1S/C30H44O7/c1-25(2,36)12-11-21(33)30(8,37)23-19(32)14-27(5)20-10-9-16-17(13-18(31)24(35)26(16,3)4)29(20,7)22(34)15-28(23,27)6/h9,11-12,17-20,23,31-32,36-37H,10,13-15H2,1-8H3	1.621	87.753	876	0.767	220	132.13	0.256	1
cucurbitacin E	18444-66-1	C08797		5281319	3944	FDB014623	LMST01010107	C32H44O8	556.688	AFC000938	NDYMQXYDSVBNLL-UHFFFAOYSA-N	CC(=O)OC(C)(C)C=CC(=O)C(C)(C1C(CC2(C)C3CC=C4C(C=C(C(=O)C4(C)C)O)C3(C)C(=O)CC12C)O)O	InChI=1S/C32H44O8/c1-17(33)40-27(2,3)13-12-23(36)32(9,39)25-21(35)15-29(6)22-11-10-18-19(14-20(34)26(38)28(18,4)5)31(22,8)24(37)16-30(25,29)7/h10,12-14,19,21-22,25,34-35,39H,11,15-16H2,1-9H3	2.094	92.075	1072	0.688	234	138.2	0.248	1
Cucurbitacin E 2-O-glucoside								C38H54O13	718.829	AFC001080	QKEJRKXVLGOJMB-UHFFFAOYSA-N	CC(=O)OC(C)(C)/C=C/C(=O)[C@@](C)([C@H]1[C@@H](C[C@@]2(C)[C@@H]3CC=C4[C@@H](C=C(C(=O)C4(C)C)OC5C(C(C(C(CO)O5)O)O)O)[C@]3(C)C(=O)C[C@]12C)O)O	InChI=1S/C38H54O13/c1-18(40)51-33(2,3)13-12-25(42)38(9,48)30-21(41)15-35(6)24-11-10-19-20(37(24,8)26(43)16-36(30,35)7)14-22(31(47)34(19,4)5)49-32-29(46)28(45)27(44)23(17-39)50-32/h10,12-14,20-21,23-24,27-30,32,39,41,44-46,48H,11,15-17H2,1-9H3	0.003	113.313	1686	0.737	294	217.35	0.303	3
cucurbitacin I	2222-07-3	C08800		5281321	3947		LMST01010110	C30H42O7	514.651	AFC001776	NISPVUDLMHQFRQ-UHFFFAOYSA-N	CC(C)(C=CC(=O)C(C)(C1C(CC2(C)C3CC=C4C(C=C(C(=O)C4(C)C)O)C3(C)C(=O)CC12C)O)O)O	InChI=1S/C30H42O7/c1-25(2,36)12-11-21(33)30(8,37)23-19(32)14-27(5)20-10-9-16-17(13-18(31)24(35)26(16,3)4)29(20,7)22(34)15-28(23,27)6/h9,11-13,17,19-20,23,31-32,36-37H,10,14-15H2,1-8H3	1.715	86.419	876	0.7	220	132.13	0.257	1
cucurbitacin I 2-O-beta-D-glucopyranoside	29803-94-9		HMDB0035701	6441519	68917	FDB014421		C36H52O12	676.792	AFC001654	LIIOJBIJVPGVGO-UHFFFAOYSA-N	CC(C)(C=CC(=O)C(C)(C1C(CC2(C)C3CC=C4C(C=C(C(=O)C4(C)C)OC5C(C(C(C(CO)O5)O)O)O)C3(C)C(=O)CC12C)O)O)O	InChI=1S/C36H52O12/c1-31(2,45)12-11-23(39)36(8,46)28-19(38)14-33(5)22-10-9-17-18(35(22,7)24(40)15-34(28,33)6)13-20(29(44)32(17,3)4)47-30-27(43)26(42)25(41)21(16-37)48-30/h9,11-13,18-19,21-22,25-28,30,37-38,41-43,45-46H,10,14-16H2,1-8H3	-0.376	107.657	1450	0.75	280	211.28	0.312	3
cucurbitacin J		C08801		441819	3948		LMST01010111	C30H44O8	532.667	AFC001790	FBGLZDYMEULGSX-UHFFFAOYSA-N	CC1(C)C2=CC[C@H]3[C@]4(C)C[C@H]([C@@H]([C@@]4(C)CC(=O)[C@@]3(C)[C@@H]2C=C(C1=O)O)[C@](C)(C(=O)C[C@H](C(C)(C)O)O)O)O	InChI=1S/C30H44O8/c1-25(2)15-9-10-19-27(5)13-18(32)23(30(8,38)21(34)12-20(33)26(3,4)37)28(27,6)14-22(35)29(19,7)16(15)11-17(31)24(25)36/h9,11,16,18-20,23,31-33,37-38H,10,12-14H2,1-8H3	0.771	88.555	903	0.767	226	152.36	0.286	1
curcumin	458-37-7	C10443	HMDB0002269	969516	3962	FDB012292		C21H20O6	368.381	AFC000838	VFLDPWHFBUODDF-UHFFFAOYSA-N	COC1=CC(=CC=C1O)C=CC(=O)CC(=O)C=CC2=CC=C(C(=C2)OC)O	InChI=1S/C21H20O6/c1-26-20-11-14(5-9-18(20)24)3-7-16(22)13-17(23)8-4-15-6-10-19(25)21(12-15)27-2/h3-12,24-25H,13H2,1-2H3	0.735	55.108	704	0.143	130	93.06	0.253	0
cyanidin	13306-05-3	C05905	HMDB0125127	128861	27843	FDB002602	LMPK12010002	[C15H11O6]+	287.245	AFC000548	VEVZSMAEJFVWIL-UHFFFAOYSA-O	C1=C(C=C(C(=C1)O)O)C2=[O+]C3=C(C=C2O)C(=CC(=C3)O)O	InChI=1S/C15H10O6/c16-8-4-11(18)9-6-13(20)15(21-14(9)5-8)7-1-2-10(17)12(19)3-7/h1-6H,(H4-,16,17,18,19,20)/p+1	-0.619	38.547	353	0	114	101.15	0.352	0
cyanidin 3-O-glucoside	47705-70-4	C08604	HMDB0030684	441667	28426	FDB002603		[C21H21O11]+	449.386	AFC001914	RKWHWFONKJEUEF-UHFFFAOYSA-O	C1=C(C=C(C(=C1)O)O)C2=[O+]C3=C(C=C2O[C@H]4[C@@H]([C@H]([C@@H]([C@@H](CO)O4)O)O)O)C(=CC(=C3)O)O	InChI=1S/C21H20O11/c22-7-16-17(27)18(28)19(29)21(32-16)31-15-6-10-12(25)4-9(23)5-14(10)30-20(15)8-1-2-11(24)13(26)3-8/h1-6,16-19,21-22,27-29H,7H2,(H3-,23,24,25,26)/p+1	-2.71	59.785	651	0.286	174	180.3	0.401	1
cyanidin O-rutinoside	28338-59-2	C08620	HMDB0031458	441674	28064	FDB007049	LMPK12010118	[C27H31O15]+	595.527	AFC001931	USNPULRDBDVJAO-UHFFFAOYSA-O	C[C@H]1[C@@H]([C@H]([C@H]([C@H](OC[C@@H]2[C@H]([C@@H]([C@H]([C@H](OC3=CC4=C(C=C(C=C4O)O)[O+]=C3C5=CC=C(C(=C5)O)O)O2)O)O)O)O1)O)O)O	InChI=1S/C27H30O15/c1-9-19(32)21(34)23(36)26(39-9)38-8-18-20(33)22(35)24(37)27(42-18)41-17-7-12-14(30)5-11(28)6-16(12)40-25(17)10-2-3-13(29)15(31)4-10/h2-7,9,18-24,26-27,32-37H,8H2,1H3,(H3-,28,29,30,31)/p+1	-3.569	80.221	1212	0.444	230	239.22	0.402	3
cyclic AMP	60-92-4	C00575	HMDB0000058	6076	17489	FDB030763		C10H12N5O6P	329.206	AFC000237	IVOMOUWHDPKRLL-UHFFFAOYSA-N	C1C2C(C(C(N3C=NC4=C3N=CN=C4N)O2)O)OP(=O)(O)O1	InChI=1S/C10H12N5O6P/c11-8-5-9(13-2-12-8)15(3-14-5)10-6(16)7-4(20-10)1-19-22(17,18)21-7/h2-4,6-7,10,16H,1H2,(H,17,18)(H2,11,12,13)	-2.819	39.544	384	0.5	128	161.37	0.49	1
cyclic GMP	7665-99-8	C00942	HMDB0001314	135398570	16356	FDB022549		C10H12N5O7P	345.206	AFC001552	ZOOGRGPOEVQQDX-UHFFFAOYSA-N	C1C2C(C(C(N3C=NC4=C3N=C(N)NC4=O)O2)O)OP(=O)(O)O1	InChI=1S/C10H12N5O7P/c11-10-13-7-4(8(17)14-10)12-2-15(7)9-5(16)6-3(21-9)1-20-23(18,19)22-6/h2-3,5-6,9,16H,1H2,(H,18,19)(H3,11,13,14,17)	-3.005	40.346	403	0.5	134	178.11	0.516	1
cyclic pyranopterin monophosphate	150829-29-1	C18239	HMDB0059639	135463437	60210	FDB030760		C10H14N5O8P	363.221	AFC001589	CZAKJJUNKNPTTO-UHFFFAOYSA-N	C1C2C(C(C3C(NC4=C(C(=O)NC(=N4)N)N3)O2)(O)O)OP(=O)(O)O1	InChI=1S/C10H14N5O8P/c11-9-14-6-3(7(16)15-9)12-4-8(13-6)22-2-1-21-24(19,20)23-5(2)10(4,17)18/h2,4-5,8,12,17-18H,1H2,(H,19,20)(H4,11,13,14,15,16)	-3.741	42.481	432	0.6	142	206.8	0.57	2
cyclic-2,3-O-oxalyl-L-threonate				90659383		FDB030762		[C6H5O7]-	189.1	AFC001501	NKBSFRFTBUHMJF-UHFFFAOYSA-M	C(C1C(C(=O)[O-])OC(=O)C(=O)O1)O	InChI=1S/C6H6O7/c7-1-2-3(4(8)9)13-6(11)5(10)12-2/h2-3,7H,1H2,(H,8,9)/p-1	-1.649	19.508	125	0.5	62	112.96	0.598	0
cyclic-3,4-O-oxalyl-L-threonate				90658084		FDB030761		[C6H5O7]-	189.1	AFC001489	FTDFTFXOJYXVTH-UHFFFAOYSA-M	C1C(C(C(=O)[O-])O)OC(=O)C(=O)O1	InChI=1S/C6H6O7/c7-3(4(8)9)2-1-12-5(10)6(11)13-2/h2-3,7H,1H2,(H,8,9)/p-1	-1.649	19.508	137	0.5	62	112.96	0.598	0
cycloartenol	468-38-5	C01902	HMDB0036591	92110	17030	FDB015503	LMST01100008	C30H50O	426.719	AFC000476	ONQRKEUAIJMULO-UHFFFAOYSA-N	CC(=CCCC(C)C1CCC2(C)C3CCC4C(C)(C)C(CCC54CC35CCC12C)O)C	InChI=1S/C30H50O/c1-20(2)9-8-10-21(3)22-13-15-28(7)24-12-11-23-26(4,5)25(31)14-16-29(23)19-30(24,29)18-17-27(22,28)6/h9,21-25,31H,8,10-19H2,1-7H3	7.554	86.942	760	0.933	190	20.23	0.047	1
cycloeucalenol	469-39-6	C02141	HMDB0030507	101690	16653	FDB014882	LMST01100011	C30H50O	426.719	AFC000503	HUNLTIZKNQDZEI-UHFFFAOYSA-N	CC(C)C(=C)CCC(C)C1CCC2(C)C3CCC4C(C)C(CCC54CC35CCC12C)O	InChI=1S/C30H50O/c1-19(2)20(3)8-9-21(4)23-12-14-28(7)26-11-10-24-22(5)25(31)13-15-29(24)18-30(26,29)17-16-27(23,28)6/h19,21-26,31H,3,8-18H2,1-2,4-7H3	7.586	86.942	760	0.933	188	20.23	0.047	1
cycloeucalenone	1255-12-5	C22121	HMDB0030507	21594790	142915	FDB002378		C30H48O	424.703	AFC001260	NFRXSIOHGADFRG-UHFFFAOYSA-N	CC(C)C(=C)CCC(C)C1CCC2(C)C3CCC4C(C)C(=O)CCC54CC35CCC12C	InChI=1S/C30H48O/c1-19(2)20(3)8-9-21(4)23-12-14-28(7)26-11-10-24-22(5)25(31)13-15-29(24)18-30(26,29)17-16-27(23,28)6/h19,21-24,26H,3,8-18H2,1-2,4-7H3	7.403	85.608	760	0.9	188	17.07	0.04	1
cysteine	3374-22-9	C00736		594	15356			C3H7NO2S	121.159	AFC000079	XUJNEKJLAYXESH-UHFFFAOYSA-N	C(C(C(=O)O)N)S	InChI=1S/C3H7NO2S/c4-2(1-7)3(5)6/h2,7H,1,4H2,(H,5,6)	-0.518	15.552	36	0.667	26	102.12	0.844	0
cysteinylglycine	19246-18-5	C01419	HMDB0000078	439498	4047	FDB021891		C5H10N2O3S	178.211	AFC000685	ZUKPVRWZDMRIEO-UHFFFAOYSA-N	C(C(=O)O)NC(=O)C(CS)N	InChI=1S/C5H10N2O3S/c6-3(2-11)5(10)7-1-4(8)9/h3,11H,1-2,6H2,(H,7,10)(H,8,9)	-1.244	22.974	107	0.6	44	131.22	0.737	0
cytidine	65-46-3	C00475	HMDB0000089	6175	17562	FDB021809		C9H13N3O5	243.217	AFC000247	UHDGCWIWMRVCDJ-UHFFFAOYSA-N	C1=CN(C2C(C(C(CO)O2)O)O)C(=O)N=C1N	InChI=1S/C9H13N3O5/c10-5-1-2-12(9(16)11-5)8-7(15)6(14)4(3-13)17-8/h1-2,4,6-8,13-15H,3H2,(H2,10,11,16)	-2.396	31.818	240	0.556	88	128.61	0.529	0
cytosine	71-30-7	C00380	HMDB0000630	597	16040	FDB022151		C4H5N3O	111.102	AFC000080	OPTASPLRGRRNAP-UHFFFAOYSA-N	C1=C(N)NC(=O)N=C1	InChI=1S/C4H5N3O/c5-3-1-2-6-4(8)7-3/h1-2H,(H3,5,6,7,8)	-0.527	14.476	54	0	36	67.48	0.608	0
D-(-)-threose	95-43-2	C06463		439665	28587			C4H8O4	120.104	AFC000494	YTBSYETUWUMLBZ-UHFFFAOYSA-N	C(=O)C(C(CO)O)O	InChI=1S/C4H8O4/c5-1-3(7)4(8)2-6/h1,3-4,6-8H,2H2	-1.663	15.582	52	0.75	30	77.76	0.648	0
D-(+)-cellotriose	33404-34-1	C06219		5287993	3528			C18H32O16	504.438	AFC000690	FYGDTMLNYKFZSV-UHFFFAOYSA-N	C(C1C(C(C(C(O1)OC2C(CO)OC(C(C2O)O)OC3C(CO)OC(C(C3O)O)O)O)O)O)O	InChI=1S/C18H32O16/c19-1-4-7(22)8(23)12(27)17(31-4)34-15-6(3-21)32-18(13(28)10(15)25)33-14-5(2-20)30-16(29)11(26)9(14)24/h4-29H,1-3H2	-6.007	65.849	820	1	178	268.68	0.533	3
D(+)-glucose	50-99-7	C00031	HMDB0000122	107526	42758	FDB012530		C6H12O6	180.156	AFC000509	GZCGUPFRVQAUEE-UHFFFAOYSA-N	C(=O)C(C(C(C(CO)O)O)O)O	InChI=1S/C6H12O6/c7-1-3(9)5(11)6(12)4(10)2-8/h1,3-6,8-12H,2H2	-2.684	23.374	114	0.833	50	118.22	0.657	0
D:C-friedoolean-7,9(11)-dien-3beta-ol-29-oic acid				70680340	71468		LMPR0106150029	C30H46O3	454.686	AFC001465	MKJSCJNRPNXEGW-UHFFFAOYSA-N	CC1(C)C2CC=C3C(=CCC4(C)C5CC(C)(CCC5(C)CCC34C)C(=O)O)C2(C)CCC1O	InChI=1S/C30H46O3/c1-25(2)21-9-8-20-19(28(21,5)12-11-23(25)31)10-13-30(7)22-18-27(4,24(32)33)15-14-26(22,3)16-17-29(20,30)6/h8,10,21-23,31H,9,11-18H2,1-7H3,(H,32,33)	6.172	85.878	715	0.833	204	57.53	0.127	1
D-4'-phosphopantothenate	5875-50-3	C03492	HMDB0001016	41635	15905	FDB022373		C9H18NO8P	299.215	AFC000416	XHFVGHPGDLDEQO-UHFFFAOYSA-N	CC(C)(COP(=O)(O)O)C(C(=O)NCCC(=O)O)O	InChI=1S/C9H18NO8P/c1-9(2,5-18-19(15,16)17)7(13)8(14)10-4-3-6(11)12/h7,13H,3-5H2,1-2H3,(H,10,14)(H,11,12)(H2,15,16,17)	-1.787	38.988	301	0.778	88	163.2	0.546	0
D-alanine	338-69-2	C00133	HMDB0001310	71080	15570	FDB022546		C3H7NO2	89.0933	AFC000081	QNAYBMKLOCPYGJ-UHFFFAOYSA-N	CC(C(=O)O)N	InChI=1S/C3H7NO2/c1-2(4)3(5)6/h2H,4H2,1H3,(H,5,6)	-0.601	12.652	24	0.667	22	63.32	0.711	0
D-alanyl-D-alanine	923-16-0	C00993	HMDB0003459	5460362	16576	FDB006399		C6H12N2O3	160.171	AFC001055	DEFJQIDDEAULHB-UHFFFAOYSA-N	CC(C(=O)NC(C)C(=O)O)N	InChI=1S/C6H12N2O3/c1-3(7)5(9)8-4(2)6(10)11/h3-4H,7H2,1-2H3,(H,8,9)(H,10,11)	-0.95	23.168	94	0.667	46	92.42	0.577	0
daphnetin	486-35-1	C03093	HMDB0130547	5280569	17313	FDB002652		C9H6O4	178.142	AFC000897	ATEFPOUAMCWAQS-UHFFFAOYSA-N	C1=CC(=C(C2=C1C=CC(=O)O2)O)O	InChI=1S/C9H6O4/c10-6-3-1-5-2-4-7(11)13-9(5)8(6)12/h1-4,10,12H	0.011	23.049	132	0	68	66.76	0.375	0
D-arabinose 5-phosphate	13137-52-5	C01112	HMDB0011734	188324	16241	FDB028414		C5H11O8P	230.11	AFC000608	PPQRONHOSHZGFQ-UHFFFAOYSA-N	C(=O)C(C(C(COP(=O)(O)O)O)O)O	InChI=1S/C5H11O8P/c6-1-3(7)5(9)4(8)2-13-14(10,11)12/h1,3-5,7-9H,2H2,(H2,10,11,12)	-2.984	26.181	159	0.8	62	154.33	0.671	0
D-carnitinyl-CoA				52921607	62047		LMFA07050162	[C28H46N8O18P3S]3-	907.696	AFC001432	BBRISSLDTUHWKG-UHFFFAOYSA-K	CC(C)(COP(=O)([O-])OP(=O)([O-])OCC1C(C(C(N2C=NC3=C2N=CN=C3N)O1)O)OP(=O)([O-])[O-])C(C(=O)NCCC(=O)NCCSC(=O)CC(C[N+](C)(C)C)O)O	InChI=1S/C28H49N8O18P3S/c1-28(2,23(41)26(42)31-7-6-18(38)30-8-9-58-19(39)10-16(37)11-36(3,4)5)13-51-57(48,49)54-56(46,47)50-12-17-22(53-55(43,44)45)21(40)27(52-17)35-15-34-20-24(29)32-14-33-25(20)35/h14-17,21-23,27,37,40-41H,6-13H2,1-5H3,(H7-,29,30,31,32,33,38,42,43,44,45,46,47,48,49)/p-3	-8.362	116.978	2897	0.714	300	446.63	0.492	4
D-cysteine	921-01-7	C00793	HMDB0003417	92851	16375	FDB023168		C3H7NO2S	121.159	AFC000079	XUJNEKJLAYXESH-UHFFFAOYSA-N	C(C(C(=O)O)N)S	InChI=1S/C3H7NO2S/c4-2(1-7)3(5)6/h2,7H,1,4H2,(H,5,6)	-0.518	15.552	36	0.667	26	102.12	0.844	0
Decaffeoyl-acteoside								C20H30O12	462.446	AFC001210	DORPKYRPJIIARM-UHFFFAOYSA-N	CC1C(C(C(C(O1)OC2C(C(CO)OC(C2O)OCCC3=CC=C(C(=C3)O)O)O)O)O)O	InChI=1S/C20H30O12/c1-8-13(24)15(26)16(27)20(30-8)32-18-14(25)12(7-21)31-19(17(18)28)29-5-4-9-2-3-10(22)11(23)6-9/h2-3,6,8,12-28H,4-5,7H2,1H3	-2.652	64.828	824	0.7	166	198.76	0.43	2
decanal	112-31-2	C12307	HMDB0011623	8175	31457	FDB012768	LMFA06000052	C10H20O	156.266	AFC000303	KSMVZQYAVGTKIV-UHFFFAOYSA-N	CCCCCCCCCC=O	InChI=1S/C10H20O/c1-2-3-4-5-6-7-8-9-10-11/h10H,2-9H2,1H3	3.678	31.738	150	0.9	38	17.07	0.109	0
decanoic acid	334-48-5	C01571	HMDB0000511	2969	30813	FDB012027	LMFA01010010	C10H20O2	172.265	AFC000200	GHVNFZFCNZKVNT-UHFFFAOYSA-N	CCCCCCCCCC(=O)O	InChI=1S/C10H20O2/c1-2-3-4-5-6-7-8-9-10(11)12/h2-9H2,1H3,(H,11,12)	3.63	32.54	169	0.9	44	37.3	0.217	0
dehydroabietylamine	1446-61-3			62034	93086			C20H31N	285.468	AFC001899	JVVXZOOGOGPDRZ-UHFFFAOYSA-N	CC(C)C1=CC=C2C(=C1)CC[C@H]3[C@@](C)(CCC[C@]23C)CN	InChI=1S/C20H31N/c1-14(2)15-6-8-17-16(12-15)7-9-18-19(3,13-21)10-5-11-20(17,18)4/h6,8,12,14,18H,5,7,9-11,13,21H2,1-4H3	4.32	56.971	335	0.7	118	26.02	0.091	1
dehydroascorbate (bicyclic form)				90659000		FDB030806		C6H8O7	192.124	AFC001500	QPPOKIPSRPKDEM-UHFFFAOYSA-N	C1C(C2C(C(C(=O)O2)(O)O)(O)O1)O	InChI=1S/C6H8O7/c7-2-1-12-6(11)3(2)13-4(8)5(6,9)10/h2-3,7,9-11H,1H2	-2.136	21.508	109	0.833	76	116.45	0.606	0
dehydroascorbic acid	490-83-5	C05422	HMDB0001264	440667	27956	FDB011907		C6H6O6	174.108	AFC000720	SBJKKFFYIZUCET-UHFFFAOYSA-N	C(C(C1C(=O)C(=O)C(=O)O1)O)O	InChI=1S/C6H6O6/c7-1-2(8)5-3(9)4(10)6(11)12-5/h2,5,7-8H,1H2	-1.629	19.373	109	0.5	58	100.9	0.58	0
dehydrocarvone								C10H12O	148.202	AFC001662	UJPMAHOMNAITRS-UHFFFAOYSA-N	C=C(C)C1C=C=C(C)C(=O)C1	InChI=1S/C10H12O/c1-7(2)9-5-4-8(3)10(11)6-9/h5,9H,1,6H2,2-3H3	2.2	26.404	99	0.4	52	17.07	0.115	0
dehydrocrepenynic acid				14427323			LMFA01031062	C18H28O2	276.414	AFC001891	HJYQCZVMQAYTMN-UHFFFAOYSA-N	CCC/C=C\C#CC/C=C\CCCCCCCC(=O)O	InChI=1S/C18H28O2/c1-2-3-4-5-6-7-8-9-10-11-12-13-14-15-16-17-18(19)20/h4-5,9-10H,2-3,8,11-17H2,1H3,(H,19,20)	6.069	51.954	521	0.611	76	37.3	0.135	2
delphinidin	13270-61-6	C05908	HMDB0130399	128853	28436	FDB002613	LMPK12010001	[C15H11O7]+	303.244	AFC000547	JKHRCGUTYDNCLE-UHFFFAOYSA-O	C1=C(C(=C(C=C1C2=[O+]C3=C(C=C2O)C(=CC(=C3)O)O)O)O)O	InChI=1S/C15H10O7/c16-7-3-9(17)8-5-12(20)15(22-13(8)4-7)6-1-10(18)14(21)11(19)2-6/h1-5H,(H5-,16,17,18,19,20,21)/p+1	-1.183	39.349	370	0	120	121.38	0.401	1
delphinidin-3-O-beta-D-glucoside	6906-38-3;50986-17-9	C12138	HMDB0037997	165558	31463	FDB017191	LMPK12010278	[C21H21O12]+	465.385	AFC001521	XENHPQQLDPAYIJ-UHFFFAOYSA-O	C1=C(C(=C(C=C1C2=[O+]C3=C(C=C2OC4C(C(C(C(CO)O4)O)O)O)C(=CC(=C3)O)O)O)O)O	InChI=1S/C21H20O12/c22-6-15-17(28)18(29)19(30)21(33-15)32-14-5-9-10(24)3-8(23)4-13(9)31-20(14)7-1-11(25)16(27)12(26)2-7/h1-5,15,17-19,21-22,28-30H,6H2,(H4-,23,24,25,26,27)/p+1	-3.273	60.587	672	0.286	180	200.53	0.431	2
delta-aminolevulinic acid hydrochloride	5451-09-2	C00430	HMDB0001149	123608	132969	FDB022452	LMFA01100055	C5H9NO3	131.13	AFC000020	ZGXJTSGNIOSYLO-UHFFFAOYSA-N	C(CC(=O)O)C(=O)CN	InChI=1S/C5H9NO3/c6-3-4(7)1-2-5(8)9/h1-3,6H2,(H,8,9)	-1.172	18.307	74	0.6	34	80.39	0.613	0
delta-carotene	31063-33-9	C08586	HMDB0036925	5281230	27705	FDB015894	LMPR01070266	C40H56	536.874	AFC000930	WGIYGODPCLMGQH-UHFFFAOYSA-N	CC(=CCCC(=CC=CC(=CC=CC(=CC=CC=C(C)C=CC=C(C)C=CC1C(=CCCC1(C)C)C)C)C)C)C	InChI=1S/C40H56/c1-32(2)18-13-21-35(5)24-15-26-36(6)25-14-22-33(3)19-11-12-20-34(4)23-16-27-37(7)29-30-39-38(8)28-17-31-40(39,9)10/h11-12,14-16,18-20,22-30,39H,13,17,21,31H2,1-10H3	12.185	107.74	1748	0.4	182	0	0	3
delta-tocopherol	119-13-1	C14151	HMDB0002902	92094	47772	FDB002432	LMPR02020066	C27H46O2	402.654	AFC000474	GZIFEOYASATJEH-UHFFFAOYSA-N	CC(C)CCCC(C)CCCC(C)CCCC1(C)CCC2=CC(=CC(=C2O1)C)O	InChI=1S/C27H46O2/c1-20(2)10-7-11-21(3)12-8-13-22(4)14-9-16-27(6)17-15-24-19-25(28)18-23(5)26(24)29-27/h18-22,28H,7-17H2,1-6H3	8.159	79.796	875	0.778	142	29.46	0.073	2
delta-tridecalactone	7370-92-5			110977				C13H24O2	212.329	AFC001880	RZZLMGATMUAJPX-UHFFFAOYSA-N	CCCCCCCCC1CCCC(=O)O1	InChI=1S/C13H24O2/c1-2-3-4-5-6-7-9-12-10-8-11-13(14)15-12/h12H,2-11H2,1H3	4.371	40.487	260	0.923	64	26.3	0.124	0
demethylmenaquinol-8		C19847		45479277	61873			C50H72O2	705.107	AFC001397	FGYPGICSXJEKCG-UHFFFAOYSA-N	CC(=CCCC(=CCCC(=CCCC(=CCCC(=CCCC(=CCCC(=CCCC(=CCC1=CC(=C2C=CC=CC2=C1O)O)C)C)C)C)C)C)C)C	InChI=1S/C50H72O2/c1-38(2)19-12-20-39(3)21-13-22-40(4)23-14-24-41(5)25-15-26-42(6)27-16-28-43(7)29-17-30-44(8)31-18-32-45(9)35-36-46-37-49(51)47-33-10-11-34-48(47)50(46)52/h10-11,19,21,23,25,27,29,31,33-35,37,51-52H,12-18,20,22,24,26,28,30,32,36H2,1-9H3	15.425	137.613	3042	0.48	240	40.46	0.057	3
denin				101268475				C33H56O14	676.791	AFC001935	UNWBBBCIZYEGIZ-UHFFFAOYSA-N	CC([C@H]1CC[C@@]2([C@@H]3CCC4C[C@H](CC[C@]4(C)[C@H]3[C@@H]([C@H]([C@]12C)O)O)O[C@H]5[C@H]([C@@H]([C@@H]([C@H](C)O5)O[C@@H]6[C@@H]([C@H]([C@@H]([C@@H](CO)O6)O)O)O)O)O)O)O	InChI=1S/C33H56O14/c1-13(35)17-8-10-33(43)18-6-5-15-11-16(7-9-31(15,3)20(18)22(37)28(42)32(17,33)4)45-29-26(41)24(39)27(14(2)44-29)47-30-25(40)23(38)21(36)19(12-34)46-30/h13-30,34-43H,5-12H2,1-4H3	-1.56	106.648	1676	1	272	239.22	0.354	3
deoxyadenosine	958-09-8	C00559	HMDB0000101	13730	17256	FDB021894		C10H13N5O3	251.242	AFC000364	OLXZPDWKRNYJJZ-UHFFFAOYSA-N	C1C(C(CO)OC1N2C=NC3=C2N=CN=C3N)O	InChI=1S/C10H13N5O3/c11-9-8-10(13-3-12-9)15(4-14-8)7-1-5(17)6(2-16)18-7/h3-7,16-17H,1-2H2,(H2,11,12,13)	-2.009	34.174	275	0.5	98	116.03	0.462	0
deoxycohumulone			HMDB0036623	25203729	134353	FDB015540		[C20H27O4]-	331.427	AFC001323	KKFIZYKKQLWBKH-UHFFFAOYSA-M	CC(=CCC1=C(C(=C(C(=C1[O-])CC=C(C)C)O)C(=O)C(C)C)O)C	InChI=1S/C20H28O4/c1-11(2)7-9-14-18(22)15(10-8-12(3)4)20(24)16(19(14)23)17(21)13(5)6/h7-8,13,22-24H,9-10H2,1-6H3/p-1	3.35	56.411	362	0.45	116	80.59	0.243	1
deoxycytidine diphosphate	800-73-7	C00705	HMDB0001245	150855	28846	FDB022510		C9H15N3O10P2	387.177	AFC000558	FTDHDKPUHBLBTL-UHFFFAOYSA-N	C1=CN(C2CC(C(COP(=O)(O)OP(=O)(O)O)O2)O)C(=O)N=C1N	InChI=1S/C9H15N3O10P2/c10-7-1-2-12(9(14)11-7)8-3-5(13)6(21-8)4-20-24(18,19)22-23(15,16)17/h1-2,5-6,8,13H,3-4H2,(H,18,19)(H2,10,11,14)(H2,15,16,17)	-3.25	44.422	490	0.556	126	221.06	0.571	1
deoxyhumulone	4374-93-0		HMDB0036624	6450808	134345	FDB015541		C21H30O4	346.461	AFC001104	NQYBQBZOHCACCR-UHFFFAOYSA-N	CC(=CCC1=C(C(=C(C(=C1O)CC=C(C)C)O)C(=O)CC(C)C)O)C	InChI=1S/C21H30O4/c1-12(2)7-9-15-19(23)16(10-8-13(3)4)21(25)18(20(15)24)17(22)11-14(5)6/h7-8,14,23-25H,9-11H2,1-6H3	4.273	60.172	387	0.476	120	77.76	0.225	1
deoxyuridine triphosphate	1173-82-6	C00460	HMDB0001191	65070	17625	FDB030842		C9H15N2O14P3	468.142	AFC000428	AHCYMLUZIRLXAA-UHFFFAOYSA-N	C1=CN(C2CC(C(COP(=O)(O)OP(=O)(O)OP(=O)(O)O)O2)O)C(=O)NC1=O	InChI=1S/C9H15N2O14P3/c12-5-3-8(11-2-1-7(13)10-9(11)14)23-6(5)4-22-27(18,19)25-28(20,21)24-26(15,16)17/h1-2,5-6,8,12H,3-4H2,(H,18,19)(H,20,21)(H,10,13,14)(H2,15,16,17)	-4.115	50.16	663	0.556	148	268.12	0.573	2
deoxyuridine-5'-diphosphate	4208-67-7	C01346	HMDB0001000	145729	28850	FDB022361		C9H14N2O11P2	388.162	AFC000555	QHWZTVCCBMIIKE-UHFFFAOYSA-N	C1=CN(C2CC(C(COP(=O)(O)OP(=O)(O)O)O2)O)C(=O)NC1=O	InChI=1S/C9H14N2O11P2/c12-5-3-8(11-2-1-7(13)10-9(11)14)21-6(5)4-20-24(18,19)22-23(15,16)17/h1-2,5-6,8,12H,3-4H2,(H,18,19)(H,10,13,14)(H2,15,16,17)	-3.305	43.457	490	0.556	126	211.78	0.546	1
dephospho-CoA	3633-59-8	C00882	HMDB0001373	444485	15468	FDB022585	LMFA07050315	C21H35N7O13P2S	687.556	AFC000763	KDTSHFARGAKYJN-UHFFFAOYSA-N	CC(C)(COP(=O)(O)OP(=O)(O)OCC1C(C(C(N2C=NC3=C2N=CN=C3N)O1)O)O)C(C(=O)NCCC(=O)NCCS)O	InChI=1S/C21H35N7O13P2S/c1-21(2,16(32)19(33)24-4-3-12(29)23-5-6-44)8-39-43(36,37)41-42(34,35)38-7-11-14(30)15(31)20(40-11)28-10-27-13-17(22)25-9-26-18(13)28/h9-11,14-16,20,30-32,44H,3-8H2,1-2H3,(H,23,29)(H,24,33)(H,34,35)(H,36,37)(H2,22,25,26)	-4.571	88.584	1747	0.667	228	355.17	0.517	4
D-erythro-imidazole-glycerol-phosphate	36244-87-8	C04666	HMDB0012208	440431	17805	FDB028853		C6H11N2O6P	238.135	AFC000713	HFYBTHCYPKEDQQ-UHFFFAOYSA-N	C1=C(C(C(COP(=O)(O)O)O)O)NC=N1	InChI=1S/C6H11N2O6P/c9-5(2-14-15(11,12)13)6(10)4-1-7-3-8-4/h1,3,5-6,9-10H,2H2,(H,7,8)(H2,11,12,13)	-3.43	28.537	190	0.5	72	141.42	0.594	0
D-erythrose-4-phosphate	585-18-2	C00279	HMDB0001321	122357	48153	FDB001614		C4H9O7P	200.084	AFC000534	NGHMDNPXVRFFGS-UHFFFAOYSA-N	C(=O)C(C(COP(=O)(O)O)O)O	InChI=1S/C4H9O7P/c5-1-3(6)4(7)2-11-12(8,9)10/h1,3-4,6-7H,2H2,(H2,8,9,10)	-2.473	22.285	120	0.75	52	134.1	0.67	0
desmosterol	313-04-2	C01802	HMDB0002719	439577	17737	FDB005374	LMST01010016	C27H44O	384.639	AFC000689	AVSXSVCZWQODGV-UHFFFAOYSA-N	CC(=CCCC(C)C1CCC2C3CC=C4CC(CCC4(C)C3CCC12C)O)C	InChI=1S/C27H44O/c1-18(2)7-6-8-19(3)23-11-12-24-22-10-9-20-17-21(28)13-15-26(20,4)25(22)14-16-27(23,24)5/h7,9,19,21-25,28H,6,8,10-17H2,1-5H3	7.126	77.661	669	0.852	158	20.23	0.053	1
desthiobiotin	15720-25-9	C01909	HMDB0003581	643	16691	FDB023201		C10H18N2O3	214.262	AFC000084	AUTOLBMXDDTRRT-UHFFFAOYSA-N	CC1C(CCCCCC(=O)O)NC(=O)N1	InChI=1S/C10H18N2O3/c1-7-8(12-10(15)11-7)5-3-2-4-6-9(13)14/h7-8H,2-6H2,1H3,(H,13,14)(H2,11,12,15)	0.989	34.208	236	0.8	68	78.43	0.366	0
D-galactose	10257-28-0	C00124	HMDB0000143	6036	4139	FDB021787		C6H12O6	180.156	AFC000214	WQZGKKKJIJFFOK-UHFFFAOYSA-N	C(C1C(C(C(C(O)O1)O)O)O)O	InChI=1S/C6H12O6/c7-1-2-3(8)4(9)5(10)6(11)12-2/h2-11H,1H2	-2.513	23.374	108	1	58	110.38	0.613	0
D-galactosylononitol	75589-40-1		HMDB0033558	10713243	133412	FDB011625		C13H24O11	356.324	AFC001153	RSYNCMYDVZFZBP-UHFFFAOYSA-N	COC1C(C(C(C(C1OC2C(C(C(C(CO)O2)O)O)O)O)O)O)O	InChI=1S/C13H24O11/c1-22-11-8(19)6(17)7(18)9(20)12(11)24-13-10(21)5(16)4(15)3(2-14)23-13/h3-21H,2H2,1H3	-4.403	47.705	389	1	124	189.53	0.532	2
D-galacturonic acid	25990-10-7	C00333	HMDB0002545	439215	4153	FDB001160		C6H10O7	194.14	AFC000497	AEMOLEFTQBMNLQ-UHFFFAOYSA-N	C1(C(C(C(=O)O)OC(C1O)O)O)O	InChI=1S/C6H10O7/c7-1-2(8)4(5(10)11)13-6(12)3(1)9/h1-4,6-9,12H,(H,10,11)	-2.305	22.842	119	0.833	64	127.45	0.657	0
D-glucosamine 1-phosphate	2152-75-2	C06156	HMDB0001109	188960	27625	FDB022429		C6H14NO8P	259.151	AFC000609	YMJBYRVFGYXULK-UHFFFAOYSA-N	C(C1C(C(C(C(O1)OP(=O)(O)O)N)O)O)O	InChI=1S/C6H14NO8P/c7-3-5(10)4(9)2(1-8)14-6(3)15-16(11,12)13/h2-6,8-10H,1,7H2,(H2,11,12,13)	-3.613	31.041	176	1	80	172.51	0.666	1
D-glucose 6-phosphate	56-73-5	C00092	HMDB0001401	21604865	58247	FDB021818		[C6H11O9P]2-	258.12	AFC001262	NBSCHQHZLSJFNQ-UHFFFAOYSA-L	C(C1C(C(C(C(O)O1)O)O)O)OP(=O)([O-])[O-]	InChI=1S/C6H13O9P/c7-3-2(1-14-16(11,12)13)15-6(10)5(9)4(3)8/h2-10H,1H2,(H2,11,12,13)/p-2	-3.991	28.743	196	1	80	172.38	0.668	0
D-glucuronic acid	528-16-5	C00191	HMDB0000127	94715	47952	FDB021897		C6H10O7	194.14	AFC000497	AEMOLEFTQBMNLQ-UHFFFAOYSA-N	C1(C(C(C(=O)O)OC(C1O)O)O)O	InChI=1S/C6H10O7/c7-1-2(8)4(5(10)11)13-6(12)3(1)9/h1-4,6-9,12H,(H,10,11)	-2.305	22.842	119	0.833	64	127.45	0.657	0
D-glyceraldehyde	453-17-8	C00577		79014	17378	FDB030769		C3H6O3	90.0781	AFC000463	MNQZXJOMYWMBOU-UHFFFAOYSA-N	C(=O)C(CO)O	InChI=1S/C3H6O3/c4-1-3(6)2-5/h1,3,5-6H,2H2	-1.152	11.687	29	0.667	20	57.53	0.639	0
D-glyceraldehyde 3-phosphate	142-10-9	C00118	HMDB0001112	439168	29052	FDB001619		C3H7O6P	170.058	AFC000638	LXJXRIRHZLFYRP-UHFFFAOYSA-N	C(=O)C(COP(=O)(O)O)O	InChI=1S/C3H7O6P/c4-1-3(5)2-9-10(6,7)8/h1,3,5H,2H2,(H2,6,7,8)	-1.962	18.39	85	0.667	42	113.87	0.67	0
D-glycerate	473-81-4	C00258	HMDB0000139	5460358	16659	FDB008493		[C3H5O4]-	105.07	AFC001054	RBNPOMFGQQGHHO-UHFFFAOYSA-M	C(C(C(=O)[O-])O)O	InChI=1S/C3H6O4/c4-1-2(5)3(6)7/h2,4-5H,1H2,(H,6,7)/p-1	-1.877	11.822	36	0.667	26	80.59	0.767	0
diadenosine tetraphosphate	5542-28-9	C01260	HMDB0001211	21706	17422	FDB022492		[C20H24N10O19P4]4-	832.356	AFC001324	YOAHKNVSNCMZGQ-UHFFFAOYSA-J	C(C1C(C(C(N2C=NC3=C2N=CN=C3N)O1)O)O)OP(=O)([O-])OP(=O)([O-])OP(=O)([O-])OP(=O)([O-])OCC4C(C(C(N5C=NC6=C5N=CN=C6N)O4)O)O	InChI=1S/C20H28N10O19P4/c21-15-9-17(25-3-23-15)29(5-27-9)19-13(33)11(31)7(45-19)1-43-50(35,36)47-52(39,40)49-53(41,42)48-51(37,38)44-2-8-12(32)14(34)20(46-8)30-6-28-10-16(22)24-4-26-18(10)30/h3-8,11-14,19-20,31-34H,1-2H2,(H,35,36)(H,37,38)(H,39,40)(H,41,42)(H2,21,23,25)(H2,22,24,26)/p-4	-9.361	91.961	2350	0.5	298	477.97	0.574	4
DIBOA-beta-D-glucoside		C15772	HMDB0033734	5316752	80091	FDB011858		C14H17NO9	343.287	AFC000999	OUSLYTBGQGKTME-UHFFFAOYSA-N	C1=CC2=C(C=C1)OC(C(=O)N2O)OC3C(C(C(C(CO)O3)O)O)O	InChI=1S/C14H17NO9/c16-5-8-9(17)10(18)11(19)13(23-8)24-14-12(20)15(21)6-3-1-2-4-7(6)22-14/h1-4,8-11,13-14,16-19,21H,5H2	-2.814	44.293	443	0.5	128	149.15	0.435	0
diethyl disulfide	110-81-6		HMDB0029572	8077		FDB000727		C4H10S2	122.255	AFC000298	CETBSQOFQKLHHZ-UHFFFAOYSA-N	CCSSCC	InChI=1S/C4H10S2/c1-3-5-6-4-2/h3-4H2,1-2H3	2.083	19.508	38	1	18	50.6	0.415	0
diethyl hydrogen phosphate	598-02-7	C06608	HMDB0012209	654	27708	FDB028854		C4H11O4P	154.102	AFC000088	UCQFCFPECQILOL-UHFFFAOYSA-N	CCOP(=O)(O)OCC	InChI=1S/C4H11O4P/c1-3-7-9(5,6)8-4-2/h3-4H2,1-2H3,(H,5,6)	-0.062	21.213	68	1	36	65.57	0.426	0
digalacturonate	5894-59-7	C02273	HMDB0039721	439694	141006	FDB019359		C12H18O13	370.264	AFC000696	IGSYEZFZPOZFNC-UHFFFAOYSA-N	C1(C(C(C(=O)O)OC(C1O)OC2C(C(C(O)OC2C(=O)O)O)O)O)O	InChI=1S/C12H18O13/c13-1-2(14)7(9(18)19)25-12(5(1)17)24-6-3(15)4(16)11(22)23-8(6)10(20)21/h1-8,11-17,22H,(H,18,19)(H,20,21)	-3.843	43.548	408	0.833	130	223.67	0.604	2
dihydroactinidolide	15356-74-8		HMDB0035240	27209		FDB013900		C11H16O2	180.244	AFC000401	IMKHDCBNRDRUEB-UHFFFAOYSA-N	CC1(C)CCCC2(C)C1=CC(=O)O2	InChI=1S/C11H16O2/c1-10(2)5-4-6-11(3)8(10)7-9(12)13-11/h7H,4-6H2,1-3H3	2.484	31.633	112	0.727	74	26.3	0.146	0
dihydrokaempferol	480-20-6	C00974	HMDB0030847	122850	15401	FDB012431		C15H12O6	288.253	AFC000535	PADQINQHPQKXNL-UHFFFAOYSA-N	C1=C(C=CC(=C1)O)C2C(C(=O)C3=C(C=C(C=C3O)O)O2)O	InChI=1S/C15H12O6/c16-8-3-1-7(2-4-8)15-14(20)13(19)12-10(18)5-9(17)6-11(12)21-15/h1-6,14-18,20H	-0.7	39.214	351	0.133	114	107.22	0.372	0
dihydrokaempferol 7-glucoside				101683279				C21H22O11	450.394	AFC001512	UDIXYHJHYVDNOG-UHFFFAOYSA-N	C1=C(C=CC(=C1)O)C2C(C(=O)C3=C(C=C(C=C3O)OC4C(C(C(C(CO)O4)O)O)O)O2)O	InChI=1S/C21H22O11/c22-7-13-15(25)17(27)19(29)21(32-13)30-10-5-11(24)14-12(6-10)31-20(18(28)16(14)26)8-1-3-9(23)4-2-8/h1-6,13,15,17-25,27-29H,7H2	-2.79	60.451	793	0.381	174	186.37	0.414	2
dihydrolipoamide	3884-47-7	C00579	HMDB0000985	663	17694	FDB022352	LMFA08010019	C8H17NOS2	207.359	AFC000089	VLYUGYAKYZETRF-UHFFFAOYSA-N	C(CCC(=O)N)CC(CCS)S	InChI=1S/C8H17NOS2/c9-8(10)4-2-1-3-7(12)5-6-11/h7,11-12H,1-6H2,(H2,9,10)	1.472	33.117	152	0.875	46	120.69	0.583	0
dihydrolipoate	462-20-4	C02147	HMDB0012210	421	18047	FDB028855		C8H16O2S2	208.344	AFC000065	IZFHEQBZOYJLPK-UHFFFAOYSA-N	C(CCC(=O)O)CC(CCS)S	InChI=1S/C8H16O2S2/c9-8(10)4-2-1-3-7(12)5-6-11/h7,11-12H,1-6H2,(H,9,10)	2.074	32.153	152	0.875	46	114.9	0.552	0
dihydromyricetin	27200-12-0	C02906		161557	28429	FDB030823		C15H12O8	320.252	AFC000583	KJXSIXMJHKAJOD-UHFFFAOYSA-N	C1=C(C(=C(C=C1C2C(C(=O)C3=C(C=C(C=C3O)O)O2)O)O)O)O	InChI=1S/C15H12O8/c16-6-3-7(17)11-10(4-6)23-15(14(22)13(11)21)5-1-8(18)12(20)9(19)2-5/h1-4,14-20,22H	-1.826	40.818	385	0.133	126	147.68	0.461	1
dihydrophilonotisÔ¨Çavone	124615-13-0							C30H18O12	570.458	AFC001669	MJRDPDQSEGRCID-UHFFFAOYSA-N	C1=CC(=C(C=C1C2=CC(=O)C3=C(C=C(C(=C3O2)C4=C(C=CC(=C4O)O)C5=CC(=O)C6=C(C=C(C=C6O)O)O5)O)O)O)O	InChI=1S/C30H18O12/c31-12-6-17(35)26-20(38)10-23(41-24(26)7-12)13-2-4-15(33)29(40)25(13)28-19(37)8-18(36)27-21(39)9-22(42-30(27)28)11-1-3-14(32)16(34)5-11/h1-10,31-37,40H	-1.752	74.426	1125	0	238	214.44	0.376	3
dihydropyrimidine				1056				C4H6N2	82.104	AFC000168	WCFAPJDPAPDDAQ-UHFFFAOYSA-N	C1=CNCN=C1	InChI=1S/C4H6N2/c1-2-5-4-6-3-1/h1-3,5H,4H2	-0.502	13.241	36	0.25	24	24.39	0.297	0
dihydroxyacetone phosphate	57-04-5	C00111	HMDB0001473	668	16108	FDB001618		C3H7O6P	170.058	AFC000090	GNGACRATGGDKBX-UHFFFAOYSA-N	C(C(=O)COP(=O)(O)O)O	InChI=1S/C3H7O6P/c4-1-3(5)2-9-10(6,7)8/h4H,1-2H2,(H2,6,7,8)	-1.972	18.39	85	0.667	42	113.87	0.67	0
dihydroxyphaseic acid		C15971	HMDB0038660	138319162	23757	FDB030828		[C15H21O5]-	281.325	AFC001602	XIVFQYWMMJWUCD-UHFFFAOYSA-M	CC(=CC(=O)[O-])C=CC1(C2(C)CC(CC1(C)OC2)O)O	InChI=1S/C15H22O5/c1-10(6-12(17)18)4-5-15(19)13(2)7-11(16)8-14(15,3)20-9-13/h4-6,11,16,19H,7-9H2,1-3H3,(H,17,18)/p-1	-0.124	44.413	318	0.667	110	89.82	0.319	0
dihydrozeatin	23599-75-9	C02029	HMDB0012215	32021	17874	FDB001400		C10H15N5O	221.259	AFC000412	XXFACTAYGKKOQB-UHFFFAOYSA-N	CC(CCNC1=C2C(=NC=N1)N=CN2)CO	InChI=1S/C10H15N5O/c1-7(4-16)2-3-11-9-8-10(13-5-12-8)15-6-14-9/h5-7,16H,2-4H2,1H3,(H2,11,12,13,14,15)	-0.514	33.904	249	0.5	78	81.37	0.368	0
dihydrozeatin-9-N-glucoside			HMDB0012213	25201996	72612	FDB028858		C16H25N5O6	383.4	AFC001315	DRPMMLWYLAPTPK-UHFFFAOYSA-N	CC(CCNC1=NC=NC2=C1N=CN2C3C(C(C(C(CO)O3)O)O)O)CO	InChI=1S/C16H25N5O6/c1-8(4-22)2-3-17-14-10-15(19-6-18-14)21(7-20-10)16-13(26)12(25)11(24)9(5-23)27-16/h6-9,11-13,16,22-26H,2-5H2,1H3,(H,17,18,19)	-2.658	55.142	606	0.688	140	162.73	0.425	2
dihydrozeatin-9-N-glucoside-O-glucoside			HMDB0012212	25201670	133477	FDB028857		C22H35N5O11	545.541	AFC001313	KDIRTCPHKDPWMQ-UHFFFAOYSA-N	CC(CCNC1=NC=NC2=C1N=CN2C3C(C(C(C(CO)O3)O)O)O)COC4C(C(C(C(CO)O4)O)O)O	InChI=1S/C22H35N5O11/c1-9(6-36-22-18(35)16(33)14(31)11(5-29)38-22)2-3-23-19-12-20(25-7-24-19)27(8-26-12)21-17(34)15(32)13(30)10(4-28)37-21/h7-11,13-18,21-22,28-35H,2-6H2,1H3,(H,23,24,25)	-4.405	76.38	1227	0.773	200	241.88	0.444	3
dihydrozeatin-O-glucoside		C16448	HMDB0012214	23724755	80499	FDB028859		C16H25N5O6	383.4	AFC001290	QRZHDHJUYBONQQ-UHFFFAOYSA-N	CC(CCNC1=C2C(=NC=N1)N=CN2)COC3C(C(C(C(CO)O3)O)O)O	InChI=1S/C16H25N5O6/c1-8(2-3-17-14-10-15(19-6-18-10)21-7-20-14)5-26-16-13(25)12(24)11(23)9(4-22)27-16/h6-9,11-13,16,22-25H,2-5H2,1H3,(H2,17,18,19,20,21)	-2.261	55.142	660	0.688	138	160.52	0.419	2
DIMBOA	15893-52-4	C04720	HMDB0034864	2358	18048	FDB013434		[C9H8NO5]-	210.164	AFC001303	NVWSHDUTSCLIGK-UHFFFAOYSA-N	COC1=CC=C2C(=C1)OC(C(=O)N2[O-])O	InChI=1S/C9H8NO5/c1-14-5-2-3-6-7(4-5)15-9(12)8(11)10(6)13/h2-4,9,12H,1H3/q-1	-1.9	26.284	188	0.222	78	82.06	0.391	0
DIMBOA-glc	113565-32-5	C04831	HMDB0029710	4480305	37573	FDB000904		C15H19NO10	373.313	AFC001355	WTGXAWKVZMQEDA-UHFFFAOYSA-N	COC1=CC=C2C(=C1)OC(C(=O)N2O)OC3C(C(C(C(CO)O3)O)O)O	InChI=1S/C15H19NO10/c1-23-6-2-3-7-8(4-6)24-15(13(21)16(7)22)26-14-12(20)11(19)10(18)9(5-17)25-14/h2-4,9-12,14-15,17-20,22H,5H2,1H3	-3.313	48.189	512	0.533	138	158.38	0.424	0
dimeric urushiol				50986152				C42H58O4	626.909	AFC001427	RIAWVQFBXPMMDD-UHFFFAOYSA-N	CCC=CC=CC=CCCCCCCCC1=C(C(=CC=C1C(C)C=CC=CC=CCCCCCCCC2=CC=CC(=C2O)O)O)O	InChI=1S/C42H58O4/c1-3-4-5-6-7-8-9-10-14-17-20-23-26-31-38-37(33-34-40(44)42(38)46)35(2)28-24-21-18-15-12-11-13-16-19-22-25-29-36-30-27-32-39(43)41(36)45/h4-9,12,15,18,21,24,27-28,30,32-35,43-46H,3,10-11,13-14,16-17,19-20,22-23,25-26,29,31H2,1-2H3	10.967	115.802	2377	0.429	206	80.92	0.129	3
dimeric urushiol peroxide				91819806				C42H58O5	642.908	AFC001504	LHTWOCYDZMMOOG-UHFFFAOYSA-N	CC=CC=CC=CC(CCCCCCCC1=CC=CC(=C1O)O)OC(C=CC=CC=CC)CCCCCCCC2=CC=CC(=C2O)O	InChI=1S/C42H58O5/c1-3-5-7-11-19-29-37(31-21-15-9-13-17-25-35-27-23-33-39(43)41(35)45)47-38(30-20-12-8-6-4-2)32-22-16-10-14-18-26-36-28-24-34-40(44)42(36)46/h3-8,11-12,19-20,23-24,27-30,33-34,37-38,43-46H,9-10,13-18,21-22,25-26,31-32H2,1-2H3	10.116	116.604	1780	0.429	210	90.15	0.14	3
dimethylallyl diphosphate	358-72-5	C00235	HMDB0001120	647	16057	FDB022434	LMPR01010001	C5H12O7P2	246.092	AFC000085	CBIDRCWHNCKSTO-UHFFFAOYSA-N	CC(=CCOP(=O)(O)OP(=O)(O)O)C	InChI=1S/C5H12O7P2/c1-5(2)3-4-11-14(9,10)12-13(6,7)8/h3H,4H2,1-2H3,(H,9,10)(H2,6,7,8)	-0.513	29.676	163	0.6	64	132.91	0.54	0
dimethylallyl-phlorisobutyrophenone			HMDB0041284	25203134	134342	FDB021200		[C15H19O4]-	263.31	AFC001320	IOBXAMCSYCVNET-UHFFFAOYSA-M	CC(=CCC1=C(C=C(C(=C1[O-])C(=O)C(C)C)O)O)C	InChI=1S/C15H20O4/c1-8(2)5-6-10-11(16)7-12(17)13(15(10)19)14(18)9(3)4/h5,7,9,16-17,19H,6H2,1-4H3/p-1	1.533	42.277	259	0.4	92	80.59	0.306	0
dipropyl disulfide	629-19-6	C08373	HMDB0031472	12377	45758	FDB008045		C6H14S2	150.308	AFC000352	ALVPFGSHPUPROW-UHFFFAOYSA-N	CCCSSCCC	InChI=1S/C6H14S2/c1-3-5-7-8-6-4-2/h3-6H2,1-2H3	3.131	25.695	74	1	26	50.6	0.337	0
di-trans, poly-cis-polyprenyl diphosphate (C80)				46926091	53037			[C80H129O7P2]3-	1264.83	AFC001414	TUNIPIPDJADHSR-UHFFFAOYSA-K	CC(=CCCC(=CCCC(=CCCC(=CCCC(=CCCC(=CCCC(=CCCC(=CCCC(=CCCC(=CCCC(=CCCC(=CCCC(=CCCC(=CCCC(=CCCC(=CCOP(=O)([O-])OP(=O)([O-])[O-])C)C)C)C)C)C)C)C)C)C)C)C)C)C)C)C	InChI=1S/C80H132O7P2/c1-65(2)33-18-34-66(3)35-19-36-67(4)37-20-38-68(5)39-21-40-69(6)41-22-42-70(7)43-23-44-71(8)45-24-46-72(9)47-25-48-73(10)49-26-50-74(11)51-27-52-75(12)53-28-54-76(13)55-29-56-77(14)57-30-58-78(15)59-31-60-79(16)61-32-62-80(17)63-64-86-89(84,85)87-88(81,82)83/h33,35,37,39,41,43,45,47,49,51,53,55,57,59,61,63H,18-32,34,36,38,40,42,44,46,48,50,52,54,56,58,60,62,64H2,1-17H3,(H,84,…	25.885	239.69	9088	0.6	394	141.4	0.112	3
di-trans,octa-cis-undecaprenyl diphosphate		C04574		25245563	58405		LMPR03030008	[C55H89O7P2]3-	924.241	AFC001351	NTXGVHCCXVHYCL-UHFFFAOYSA-K	CC(=CCCC(=CCCC(=CCCC(=CCCC(=CCCC(=CCCC(=CCCC(=CCCC(=CCCC(=CCCC(=CCOP(=O)([O-])OP(=O)([O-])[O-])C)C)C)C)C)C)C)C)C)C)C	InChI=1S/C55H92O7P2/c1-45(2)23-13-24-46(3)25-14-26-47(4)27-15-28-48(5)29-16-30-49(6)31-17-32-50(7)33-18-34-51(8)35-19-36-52(9)37-20-38-53(10)39-21-40-54(11)41-22-42-55(12)43-44-61-64(59,60)62-63(56,57)58/h23,25,27,29,31,33,35,37,39,41,43H,13-22,24,26,28,30,32,34,36,38,40,42,44H2,1-12H3,(H,59,60)(H2,56,57,58)/p-3	16.752	169.019	4613	0.6	284	141.4	0.153	3
divinyl protochlorophyllide a	18433-30-2	C11831		443429	30619			[C35H30N4O5]2-	586.638	AFC000751	ZFNVSSMAZYSILJ-UHFFFAOYSA-L	C=CC1=C2C=C3C(=C(C=C)C(=N3)C=C4C(=C5C(=C(C(C5=O)C(=O)OC)C6=NC(=CC(=C1C)[N-]2)C(=C6CCC(=O)O)C)[N-]4)C)C	InChI=1S/C35H32N4O5/c1-8-19-15(3)22-12-24-17(5)21(10-11-28(40)41)32(38-24)30-31(35(43)44-7)34(42)29-18(6)25(39-33(29)30)14-27-20(9-2)16(4)23(37-27)13-26(19)36-22/h8-9,12-14,31H,1-2,10-11H2,3-7H3,(H3,36,37,38,39,40,41,42)/p-2	3.395	90.014	1075	0.229	248	105.39	0.18	1
D-mannitol	69-65-8	C00392	HMDB0000765	6251	16899	FDB001982		C6H14O6	182.172	AFC000212	FBPFZTCFMRRESA-UHFFFAOYSA-N	C(C(C(C(C(CO)O)O)O)O)O	InChI=1S/C6H14O6/c7-1-3(9)5(11)6(12)4(10)2-8/h3-12H,1-2H2	-2.94	24.707	114	1	50	121.38	0.667	1
D-mannitol 1-phosphate	15806-48-1	C00644	HMDB0001530	130418	16298	FDB022673		C6H15O9P	262.152	AFC000550	GACTWZZMVMUKNG-UHFFFAOYSA-N	C(C(C(C(C(COP(=O)(O)O)O)O)O)O)O	InChI=1S/C6H15O9P/c7-1-3(8)5(10)6(11)4(9)2-15-16(12,13)14/h3-11H,1-2H2,(H2,12,13,14)	-3.751	31.41	206	1	72	177.72	0.678	1
D-melibiose	585-99-9	C05402	HMDB0000048	440658	28053	FDB001204		C12H22O11	342.297	AFC000719	DLRVVLDZNNYCBX-UHFFFAOYSA-N	C(C1C(C(C(C(OCC2C(C(C(C(O)O2)O)O)O)O1)O)O)O)O	InChI=1S/C12H22O11/c13-1-3-5(14)8(17)10(19)12(23-3)21-2-4-6(15)7(16)9(18)11(20)22-4/h3-20H,1-2H2	-4.26	44.611	415	1	118	189.53	0.554	2
D-myo-inositol (1,2) bisphosphate				25245835				[C6H10O12P2]4-	336.084	AFC001254	MCKAJXMRULSUKI-UHFFFAOYSA-J	C1(C(C(C(C(C1O)OP(=O)([O-])[O-])OP(=O)([O-])[O-])O)O)O	InChI=1S/C6H14O12P2/c7-1-2(8)4(10)6(18-20(14,15)16)5(3(1)9)17-19(11,12)13/h1-10H,(H2,11,12,13)(H2,14,15,16)/p-4	-6.02	34.112	226	1	104	245.38	0.73	1
D-myo-inositol (1,2,3) trisphosphate				25244812		FDB030774		[C6H9O15P3]6-	414.048	AFC001328	GKDKOMAJZATYAY-UHFFFAOYSA-H	C1(C(C(C(C(C1O)OP(=O)([O-])[O-])OP(=O)([O-])[O-])OP(=O)([O-])[O-])O)O	InChI=1S/C6H15O15P3/c7-1-2(8)4(19-22(10,11)12)6(21-24(16,17)18)5(3(1)9)20-23(13,14)15/h1-9H,(H2,10,11,12)(H2,13,14,15)(H2,16,17,18)/p-6	-7.498	39.481	300	1	126	307.38	0.743	1
D-myo-inositol (1,2,3,4) tetrakisphosphate				25244337				[C6H8O18P4]8-	492.012	AFC001310	MRVYFOANPDTYBY-UHFFFAOYSA-F	C1(C(C(C(C(C1OP(=O)([O-])[O-])OP(=O)([O-])[O-])OP(=O)([O-])[O-])OP(=O)([O-])[O-])O)O	InChI=1S/C6H16O18P4/c7-1-2(8)4(22-26(12,13)14)6(24-28(18,19)20)5(23-27(15,16)17)3(1)21-25(9,10)11/h1-8H,(H2,9,10,11)(H2,12,13,14)(H2,15,16,17)(H2,18,19,20)/p-8	-8.976	44.85	390	1	148	369.38	0.751	1
D-myo-inositol (1,2,3,4,5)-pentakisphosphate				25246002	18345	FDB030776		[C6H7O21P5]10-	569.976	AFC001358	CTPQAXVNYGZUAJ-UHFFFAOYSA-D	C1(C(C(C(C(C1OP(=O)([O-])[O-])OP(=O)([O-])[O-])OP(=O)([O-])[O-])OP(=O)([O-])[O-])OP(=O)([O-])[O-])O	InChI=1S/C6H17O21P5/c7-1-2(23-28(8,9)10)4(25-30(14,15)16)6(27-32(20,21)22)5(26-31(17,18)19)3(1)24-29(11,12)13/h1-7H,(H2,8,9,10)(H2,11,12,13)(H2,14,15,16)(H2,17,18,19)(H2,20,21,22)/p-10	-10.454	50.22	468	1	170	431.38	0.757	2
D-myo-inositol (1,2,3,5,6) pentakisphosphate		C04579		25246187	58747	FDB030777		[C6H7O21P5]10-	569.976	AFC001358	CTPQAXVNYGZUAJ-UHFFFAOYSA-D	C1(C(C(C(C(C1OP(=O)([O-])[O-])OP(=O)([O-])[O-])OP(=O)([O-])[O-])OP(=O)([O-])[O-])OP(=O)([O-])[O-])O	InChI=1S/C6H17O21P5/c7-1-2(23-28(8,9)10)4(25-30(14,15)16)6(27-32(20,21)22)5(26-31(17,18)19)3(1)24-29(11,12)13/h1-7H,(H2,8,9,10)(H2,11,12,13)(H2,14,15,16)(H2,17,18,19)(H2,20,21,22)/p-10	-10.454	50.22	468	1	170	431.38	0.757	2
D-myo-inositol (1,2,3,6) tetrakisphosphate				25201651				[C6H8O18P4]8-	492.012	AFC001310	MRVYFOANPDTYBY-UHFFFAOYSA-F	C1(C(C(C(C(C1OP(=O)([O-])[O-])OP(=O)([O-])[O-])OP(=O)([O-])[O-])OP(=O)([O-])[O-])O)O	InChI=1S/C6H16O18P4/c7-1-2(8)4(22-26(12,13)14)6(24-28(18,19)20)5(23-27(15,16)17)3(1)21-25(9,10)11/h1-8H,(H2,9,10,11)(H2,12,13,14)(H2,15,16,17)(H2,18,19,20)/p-8	-8.976	44.85	390	1	148	369.38	0.751	1
D-myo-inositol (1,2,4,5,6)-pentakisphosphate	20298-95-7	C04563		440388	16507	FDB030779		C6H17O21P5	580.056	AFC000684	CTPQAXVNYGZUAJ-UHFFFAOYSA-N	C1(C(C(C(C(C1OP(=O)(O)O)OP(=O)(O)O)OP(=O)(O)O)OP(=O)(O)O)OP(=O)(O)O)O	InChI=1S/C6H17O21P5/c7-1-2(23-28(8,9)10)4(25-30(14,15)16)6(27-32(20,21)22)5(26-31(17,18)19)3(1)24-29(11,12)13/h1-7H,(H2,8,9,10)(H2,11,12,13)(H2,14,15,16)(H2,17,18,19)(H2,20,21,22)	-7.116	56.887	468	1	170	403.08	0.695	3
D-myo-inositol (1,2,5,6) tetrakisphosphate				14033625	133328			C6H16O18P4	500.076	AFC000750	MRVYFOANPDTYBY-UHFFFAOYSA-N	C1(C(C(C(C(C1OP(=O)(O)O)OP(=O)(O)O)OP(=O)(O)O)OP(=O)(O)O)O)O	InChI=1S/C6H16O18P4/c7-1-2(8)4(22-26(12,13)14)6(24-28(18,19)20)5(23-27(15,16)17)3(1)21-25(9,10)11/h1-8H,(H2,9,10,11)(H2,12,13,14)(H2,15,16,17)(H2,18,19,20)	-6.305	50.185	390	1	148	346.74	0.694	3
D-myo-inositol (1,2,6) trisphosphate				25244400		FDB030781		[C6H9O15P3]6-	414.048	AFC001328	GKDKOMAJZATYAY-UHFFFAOYSA-H	C1(C(C(C(C(C1O)OP(=O)([O-])[O-])OP(=O)([O-])[O-])OP(=O)([O-])[O-])O)O	InChI=1S/C6H15O15P3/c7-1-2(8)4(19-22(10,11)12)6(21-24(16,17)18)5(3(1)9)20-23(13,14)15/h1-9H,(H2,10,11,12)(H2,13,14,15)(H2,16,17,18)/p-6	-7.498	39.481	300	1	126	307.38	0.743	1
D-myo-inositol (1,3,4)-trisphosphate	98102-63-7	C01243	HMDB0001143	439455	18228	FDB022450		C6H15O15P3	420.096	AFC000682	MMWCIQZXVOZEGG-UHFFFAOYSA-N	C1(C(C(C(C(C1OP(=O)(O)O)O)OP(=O)(O)O)OP(=O)(O)O)O)O	InChI=1S/C6H15O15P3/c7-1-2(8)5(20-23(13,14)15)6(21-24(16,17)18)3(9)4(1)19-22(10,11)12/h1-9H,(H2,10,11,12)(H2,13,14,15)(H2,16,17,18)	-5.495	43.482	328	1	126	290.4	0.691	2
D-myo-inositol (1,3,4,5)-tetrakisphosphate		C01272		24742076	57895			[C6H8O18P4]8-	492.012	AFC001292	CIPFCGZLFXVXBG-UHFFFAOYSA-F	C1(C(C(C(C(C1OP(=O)([O-])[O-])OP(=O)([O-])[O-])OP(=O)([O-])[O-])O)OP(=O)([O-])[O-])O	InChI=1S/C6H16O18P4/c7-1-3(21-25(9,10)11)2(8)5(23-27(15,16)17)6(24-28(18,19)20)4(1)22-26(12,13)14/h1-8H,(H2,9,10,11)(H2,12,13,14)(H2,15,16,17)(H2,18,19,20)/p-8	-8.976	44.85	390	1	148	369.38	0.751	1
D-myo-inositol (1,3,4,5,6)-pentakisphosphate	20298-97-9	C01284	HMDB0003529	439468	16322	FDB023187		C6H17O21P5	580.056	AFC000684	CTPQAXVNYGZUAJ-UHFFFAOYSA-N	C1(C(C(C(C(C1OP(=O)(O)O)OP(=O)(O)O)OP(=O)(O)O)OP(=O)(O)O)OP(=O)(O)O)O	InChI=1S/C6H17O21P5/c7-1-2(23-28(8,9)10)4(25-30(14,15)16)6(27-32(20,21)22)5(26-31(17,18)19)3(1)24-29(11,12)13/h1-7H,(H2,8,9,10)(H2,11,12,13)(H2,14,15,16)(H2,17,18,19)(H2,20,21,22)	-7.116	56.887	468	1	170	403.08	0.695	3
D-myo-inositol (1,3,4,6)-tetrakisphosphate	110298-84-5	C04477	HMDB0001187	121969	16155	FDB022475		C6H16O18P4	500.076	AFC000527	ZAWIXNGTTZTBKV-UHFFFAOYSA-N	C1(C(C(C(C(C1OP(=O)(O)O)OP(=O)(O)O)O)OP(=O)(O)O)OP(=O)(O)O)O	InChI=1S/C6H16O18P4/c7-1-3(21-25(9,10)11)5(23-27(15,16)17)2(8)6(24-28(18,19)20)4(1)22-26(12,13)14/h1-8H,(H2,9,10,11)(H2,12,13,14)(H2,15,16,17)(H2,18,19,20)	-6.305	50.185	406	1	148	346.74	0.694	3
D-myo-inositol (1,4)-bisphosphate	47055-78-7	C01220	HMDB0000968	439444	17816	FDB022343		C6H14O12P2	340.116	AFC000679	PELZSPZCXGTUMR-UHFFFAOYSA-N	C1(C(C(C(C(C1OP(=O)(O)O)O)O)OP(=O)(O)O)O)O	InChI=1S/C6H14O12P2/c7-1-2(8)6(18-20(14,15)16)4(10)3(9)5(1)17-19(11,12)13/h1-10H,(H2,11,12,13)(H2,14,15,16)	-4.685	36.779	266	1	104	234.06	0.688	2
D-myo-inositol (1,4,5)-trisphosphate	85166-31-0	C01245	HMDB0001498	439456	16595	FDB022657		C6H15O15P3	420.096	AFC000682	MMWCIQZXVOZEGG-UHFFFAOYSA-N	C1(C(C(C(C(C1OP(=O)(O)O)O)OP(=O)(O)O)OP(=O)(O)O)O)O	InChI=1S/C6H15O15P3/c7-1-2(8)5(20-23(13,14)15)6(21-24(16,17)18)3(9)4(1)19-22(10,11)12/h1-9H,(H2,10,11,12)(H2,13,14,15)(H2,16,17,18)	-5.495	43.482	328	1	126	290.4	0.691	2
D-myo-inositol (1,4,5,6)-tetrakisphosphate	121010-58-0	C11555	HMDB0004527	443266	16067	FDB023378		C6H16O18P4	500.076	AFC000750	MRVYFOANPDTYBY-UHFFFAOYSA-N	C1(C(C(C(C(C1OP(=O)(O)O)OP(=O)(O)O)OP(=O)(O)O)OP(=O)(O)O)O)O	InChI=1S/C6H16O18P4/c7-1-2(8)4(22-26(12,13)14)6(24-28(18,19)20)5(23-27(15,16)17)3(1)21-25(9,10)11/h1-8H,(H2,9,10,11)(H2,12,13,14)(H2,15,16,17)(H2,18,19,20)	-6.305	50.185	390	1	148	346.74	0.694	3
D-myo-inositol (2,3,4) trisphosphate				25244128				[C6H9O15P3]6-	414.048	AFC001328	GKDKOMAJZATYAY-UHFFFAOYSA-H	C1(C(C(C(C(C1O)OP(=O)([O-])[O-])OP(=O)([O-])[O-])OP(=O)([O-])[O-])O)O	InChI=1S/C6H15O15P3/c7-1-2(8)4(19-22(10,11)12)6(21-24(16,17)18)5(3(1)9)20-23(13,14)15/h1-9H,(H2,10,11,12)(H2,13,14,15)(H2,16,17,18)/p-6	-7.498	39.481	300	1	126	307.38	0.743	1
D-myo-inositol (2,4) bisphosphate				25245743	133416			[C6H10O12P2]4-	336.084	AFC001352	PUVHMWJJTITUGO-UHFFFAOYSA-J	C1(C(C(C(C(C1O)OP(=O)([O-])[O-])O)OP(=O)([O-])[O-])O)O	InChI=1S/C6H14O12P2/c7-1-2(8)5(17-19(11,12)13)4(10)6(3(1)9)18-20(14,15)16/h1-10H,(H2,11,12,13)(H2,14,15,16)/p-4	-6.02	34.112	246	1	104	245.38	0.73	1
D-myo-inositol (3,4)-bisphosphate		C04063	HMDB0006235	21120281	83241	FDB023852		[C6H10O12P2]4-	336.084	AFC001254	MCKAJXMRULSUKI-UHFFFAOYSA-J	C1(C(C(C(C(C1O)OP(=O)([O-])[O-])OP(=O)([O-])[O-])O)O)O	InChI=1S/C6H14O12P2/c7-1-2(8)4(10)6(18-20(14,15)16)5(3(1)9)17-19(11,12)13/h1-10H,(H2,11,12,13)(H2,14,15,16)/p-4	-6.02	34.112	226	1	104	245.38	0.73	1
D-myo-inositol (3,4,5,6)-tetrakisphosphate		C04520	HMDB0003848	25201333	57539	FDB023236		[C6H8O18P4]8-	492.012	AFC001310	MRVYFOANPDTYBY-UHFFFAOYSA-F	C1(C(C(C(C(C1OP(=O)([O-])[O-])OP(=O)([O-])[O-])OP(=O)([O-])[O-])OP(=O)([O-])[O-])O)O	InChI=1S/C6H16O18P4/c7-1-2(8)4(22-26(12,13)14)6(24-28(18,19)20)5(23-27(15,16)17)3(1)21-25(9,10)11/h1-8H,(H2,9,10,11)(H2,12,13,14)(H2,15,16,17)(H2,18,19,20)/p-8	-8.976	44.85	390	1	148	369.38	0.751	1
D-myo-inositol (3,4,6)-trisphosphate				25200986	62918			[C6H9O15P3]6-	414.048	AFC001306	MMWCIQZXVOZEGG-UHFFFAOYSA-H	C1(C(C(C(C(C1OP(=O)([O-])[O-])O)OP(=O)([O-])[O-])OP(=O)([O-])[O-])O)O	InChI=1S/C6H15O15P3/c7-1-2(8)5(20-23(13,14)15)6(21-24(16,17)18)3(9)4(1)19-22(10,11)12/h1-9H,(H2,10,11,12)(H2,13,14,15)(H2,16,17,18)/p-6	-7.498	39.481	328	1	126	307.38	0.743	1
D-myo-inositol 1,2-cyclic phosphate	43119-57-9	C04299	HMDB0001125	122331	18426	FDB022438		C6H11O8P	242.121	AFC000532	SXHMVNXROAUURW-UHFFFAOYSA-N	C1(C(C(C2C(C1O)OP(=O)(O)O2)O)O)O	InChI=1S/C6H11O8P/c7-1-2(8)4(10)6-5(3(1)9)13-15(11,12)14-6/h1-10H,(H,11,12)	-3.108	27.941	152	1	84	146.49	0.605	0
docosanedioate	505-56-6	C19625		244872;22173968	76299	FDB030835	LMFA01170037	[C22H40O4]2-	368.551	AFC001266	DGXRZJSPDXZJFG-UHFFFAOYSA-L	C(CCCCCCCCCCC(=O)[O-])CCCCCCCCCC(=O)[O-]	InChI=1S/C22H42O4/c23-21(24)19-17-15-13-11-9-7-5-3-1-2-4-6-8-10-12-14-16-18-20-22(25)26/h1-20H2,(H,23,24)(H,25,26)/p-2	6.446	68.6	884	0.909	102	80.26	0.218	2
docosanoic acid	112-85-6	C08281	HMDB0000944	8215	28941	FDB005830	LMFA01010022	C22H44O2	340.584	AFC000308	UKMSUNONTOPOIO-UHFFFAOYSA-N	CCCCCCCCCCCCCCCCCCCCCC(=O)O	InChI=1S/C22H44O2/c1-2-3-4-5-6-7-8-9-10-11-12-13-14-15-16-17-18-19-20-21-22(23)24/h2-21H2,1H3,(H,23,24)	9.105	69.663	769	0.955	92	37.3	0.11	2
dodecanal	112-54-9	C02278	HMDB0033933	8194	27836	FDB012137	LMFA06000071	C12H24O	184.319	AFC000306	HFJRKMMYBMWEAD-UHFFFAOYSA-N	CCCCCCCCCCCC=O	InChI=1S/C12H24O/c1-2-3-4-5-6-7-8-9-10-11-12-13/h12H,2-11H2,1H3	4.59	37.925	216	0.917	46	17.07	0.093	1
dodecanoate	143-07-7	C02679	HMDB0000638	4149208	30805	FDB003010	LMFA01010012	[C12H23O2]-	199.31	AFC000863	POULHZVOKOAJMA-UHFFFAOYSA-M	CCCCCCCCCCCC(=O)[O-]	InChI=1S/C12H24O2/c1-2-3-4-5-6-7-8-9-10-11-12(13)14/h2-11H2,1H3,(H,13,14)/p-1	3.865	38.06	239	0.917	52	40.13	0.201	0
dopamine	51-61-6	C03758	HMDB0000073	681	18243	FDB012163		C8H11NO2	153.179	AFC000092	VYFYYTLLBUKUHU-UHFFFAOYSA-N	C1=C(CCN)C=C(C(=C1)O)O	InChI=1S/C8H11NO2/c9-4-3-6-1-2-7(10)8(11)5-6/h1-2,5,10-11H,3-4,9H2	-0.336	24.119	113	0.25	50	66.48	0.434	0
dopaquinone	25520-73-4	C00822	HMDB0001229	439316	16852	FDB022501		C9H9NO4	195.172	AFC000663	AHMIDUVKSGCHAU-UHFFFAOYSA-N	C1=CC(=O)C(=O)C=C1CC(C(=O)O)N	InChI=1S/C9H9NO4/c10-6(9(13)14)3-5-1-2-7(11)8(12)4-5/h1-2,4,6H,3,10H2,(H,13,14)	-0.507	26.149	170	0.222	66	97.46	0.5	0
D-pinitol	484-68-4	C03844	HMDB0034219	164619	28548	FDB012524		C7H14O6	194.183	AFC000587	DSCFFEYYQKSRSV-UHFFFAOYSA-N	COC1C(C(C(C(C1O)O)O)O)O	InChI=1S/C7H14O6/c1-13-7-5(11)3(9)2(8)4(10)6(7)12/h2-12H,1H3	-2.656	26.467	117	1	64	110.38	0.569	0
D-ribosylnicotinate	17720-18-2	C05841	HMDB0006809	161233	58527	FDB031293		C11H13NO6	255.224	AFC000578	PUEDDPCUCPRQNY-UHFFFAOYSA-N	C1=C[N+](=CC(=C1)C(=O)[O-])C2C(C(C(CO)O2)O)O	InChI=1S/C11H13NO6/c13-5-7-8(14)9(15)10(18-7)12-3-1-2-6(4-12)11(16)17/h1-4,7-10,13-15H,5H2	-3.854	33.94	259	0.455	92	113.06	0.443	0
D-ribulose-1,5-bisphosphate	24218-00-6	C01182		23615473	57870	FDB030796		[C5H8O11P2]4-	306.058	AFC001279	YAHZABJORDUQGO-UHFFFAOYSA-J	C(C(C(C(=O)COP(=O)([O-])[O-])O)O)OP(=O)([O-])[O-]	InChI=1S/C5H12O11P2/c6-3(1-15-17(9,10)11)5(8)4(7)2-16-18(12,13)14/h3,5-6,8H,1-2H2,(H2,9,10,11)(H2,12,13,14)/p-4	-5.138	30.216	263	0.8	84	221.99	0.726	1
D-ribulose-1-phosphate	63323-91-1		HMDB0006534	14844436	71687	FDB023963		C5H11O8P	230.11	AFC001230	NBOCCPQHBPGYCX-UHFFFAOYSA-N	C(C(C(C(=O)COP(=O)(O)O)O)O)O	InChI=1S/C5H11O8P/c6-1-3(7)5(9)4(8)2-13-14(10,11)12/h3,5-7,9H,1-2H2,(H2,10,11,12)	-2.993	26.181	159	0.8	62	154.33	0.671	0
D-ribulose-5-phosphate	4151-19-3	C00199	HMDB0000618	439184	17363	FDB022145		C5H11O8P	230.11	AFC000642	FNZLKVNUWIIPSJ-UHFFFAOYSA-N	C(C(=O)C(C(COP(=O)(O)O)O)O)O	InChI=1S/C5H11O8P/c6-1-3(7)5(9)4(8)2-13-14(10,11)12/h4-6,8-9H,1-2H2,(H2,10,11,12)	-2.993	26.181	159	0.8	62	154.33	0.671	0
D-sedoheptulose-1,7-bisphosphate	815-91-8	C00447	HMDB0060274	164735	17969	FDB030798		C7H16O13P2	370.142	AFC000589	OKHXOUGRECCASI-UHFFFAOYSA-N	C(C(C(C(C(C(=O)COP(=O)(O)O)O)O)O)O)OP(=O)(O)O	InChI=1S/C7H16O13P2/c8-3(1-19-21(13,14)15)5(10)7(12)6(11)4(9)2-20-22(16,17)18/h3,5-8,10-12H,1-2H2,(H2,13,14,15)(H2,16,17,18)	-4.825	40.675	385	0.857	104	251.13	0.679	2
D-sedoheptulose-7-phosphate		C05382	HMDB0001068	46878379	57483	FDB022407		[C7H13O10P]2-	288.146	AFC001408	JDTUMPKOJBQPKX-UHFFFAOYSA-L	C(C(=O)C(C(C(C(COP(=O)([O-])[O-])O)O)O)O)O	InChI=1S/C7H15O10P/c8-1-3(9)5(11)7(13)6(12)4(10)2-17-18(14,15)16/h4-8,10-13H,1-2H2,(H2,14,15,16)/p-2	-4.682	32.638	257	0.857	82	200.45	0.696	0
D-serine	312-84-5	C00740	HMDB0003406	71077	16523	FDB023164		C3H7NO3	105.093	AFC000083	MTCFGRXMJLQNBG-UHFFFAOYSA-N	C(C(C(=O)O)N)O	InChI=1S/C3H7NO3/c4-2(1-5)3(6)7/h2,5H,1,4H2,(H,6,7)	-1.489	13.454	36	0.667	26	83.55	0.795	0
dTDP-4-dehydro-6-deoxy-alpha-D-glucose		C11907	HMDB0001399	439292	16128	FDB022601		C16H24N2O15P2	546.314	AFC000662	PSXWNITXWWECNY-UHFFFAOYSA-N	CC1=CN(C2CC(C(COP(=O)(O)OP(=O)(O)OC3C(C(C(=O)C(C)O3)O)O)O2)O)C(=O)NC1=O	InChI=1S/C16H24N2O15P2/c1-6-4-18(16(24)17-14(6)23)10-3-8(19)9(31-10)5-29-34(25,26)33-35(27,28)32-15-13(22)12(21)11(20)7(2)30-15/h4,7-10,12-13,15,19,21-22H,3,5H2,1-2H3,(H,25,26)(H,27,28)(H,17,23,24)	-3.47	65.653	1024	0.688	188	267.54	0.49	3
dTDP-4-dehydro-beta-L-rhamnose		C00688	HMDB0006354	443211	45868	FDB023902		C16H24N2O15P2	546.314	AFC000662	PSXWNITXWWECNY-UHFFFAOYSA-N	CC1=CN(C2CC(C(COP(=O)(O)OP(=O)(O)OC3C(C(C(=O)C(C)O3)O)O)O2)O)C(=O)NC1=O	InChI=1S/C16H24N2O15P2/c1-6-4-18(16(24)17-14(6)23)10-3-8(19)9(31-10)5-29-34(25,26)33-35(27,28)32-15-13(22)12(21)11(20)7(2)30-15/h4,7-10,12-13,15,19,21-22H,3,5H2,1-2H3,(H,25,26)(H,27,28)(H,17,23,24)	-3.47	65.653	1024	0.688	188	267.54	0.49	3
dTDP-alpha-L-rhamnose		C03319	HMDB0006354	101989498	133429	FDB023902		C16H26N2O15P2	548.33	AFC001514	ZOSQFDVXNQFKBY-UHFFFAOYSA-N	CC1=CN(C2CC(C(COP(=O)(O)OP(=O)(O)OC3C(C(C(C(C)O3)O)O)O)O2)O)C(=O)NC1=O	InChI=1S/C16H26N2O15P2/c1-6-4-18(16(24)17-14(6)23)10-3-8(19)9(31-10)5-29-34(25,26)33-35(27,28)32-15-13(22)12(21)11(20)7(2)30-15/h4,7-13,15,19-22H,3,5H2,1-2H3,(H,25,26)(H,27,28)(H,17,23,24)	-3.717	66.987	1024	0.75	188	270.7	0.494	3
D-threo-isocitrate	6061-97-8	C00451	HMDB0001874	5459771	15562	FDB030800		[C6H5O7]3-	189.1	AFC001039	ODBLHEXUDAPZAU-UHFFFAOYSA-K	C(C(C(C(=O)[O-])O)C(=O)[O-])C(=O)[O-]	InChI=1S/C6H8O7/c7-3(8)1-2(5(10)11)4(9)6(12)13/h2,4,9H,1H2,(H,7,8)(H,10,11)(H,12,13)/p-3	-3.373	19.508	110	0.5	56	140.62	0.744	0
D-threose	583-50-6	C06463		94176	27904			C4H8O4	120.104	AFC000494	YTBSYETUWUMLBZ-UHFFFAOYSA-N	C(=O)C(C(CO)O)O	InChI=1S/C4H8O4/c5-1-3(7)4(8)2-6/h1,3-4,6-8H,2H2	-1.663	15.582	52	0.75	30	77.76	0.648	0
D-xylulose	551-84-8	C00310	HMDB0001644	5289590	17140	FDB022698		C5H10O5	150.13	AFC000993	ZAQJHHRNXZUBTE-UHFFFAOYSA-N	C(C(C(C(=O)CO)O)O)O	InChI=1S/C5H10O5/c6-1-3(8)5(10)4(9)2-7/h3,5-8,10H,1-2H2	-2.183	19.478	79	0.8	40	97.99	0.653	0
D-xylulose-5-phosphate	4212-65-1	C00231	HMDB0000868	439190	16332	FDB030802		C5H11O8P	230.11	AFC000642	FNZLKVNUWIIPSJ-UHFFFAOYSA-N	C(C(=O)C(C(COP(=O)(O)O)O)O)O	InChI=1S/C5H11O8P/c6-1-3(7)5(9)4(8)2-13-14(10,11)12/h4-6,8-9H,1-2H2,(H2,10,11,12)	-2.993	26.181	159	0.8	62	154.33	0.671	0
eicosanoyl-CoA	15895-27-9	C02041	HMDB0004258	3081439	15527	FDB023354	LMFA07050329	C41H74N7O17P3S	1062.05	AFC000854	JYLSVNBJLYCSSW-UHFFFAOYSA-N	CCCCCCCCCCCCCCCCCCCC(=O)SCCNC(=O)CCNC(=O)C(C(C)(C)COP(=O)(O)OP(=O)(O)OCC1C(C(C(N2C=NC3=C2N=CN=C3N)O1)O)OP(=O)(O)O)O	InChI=1S/C41H74N7O17P3S/c1-4-5-6-7-8-9-10-11-12-13-14-15-16-17-18-19-20-21-32(50)69-25-24-43-31(49)22-23-44-39(53)36(52)41(2,3)27-62-68(59,60)65-67(57,58)61-26-30-35(64-66(54,55)56)34(51)40(63-30)48-29-47-33-37(42)45-28-46-38(33)48/h28-30,34-36,40,51-52H,4-27H2,1-3H3,(H,43,49)(H,44,53)(H,57,58)(H,59,60)(H2,42,45,46)(H2,54,55,56)	3.007	156.627	4984	0.805	336	415.08	0.391	4
eicosapentaenoic acid	10417-94-4	C06428	HMDB0001999	446284	28364	FDB030126	LMFA01030759	C20H30O2	302.452	AFC000781	JAZBEHYOTPTENJ-UHFFFAOYSA-N	CCC=CCC=CCC=CCC=CCC=CCCCC(=O)O	InChI=1S/C20H30O2/c1-2-3-4-5-6-7-8-9-10-11-12-13-14-15-16-17-18-19-20(21)22/h3-4,6-7,9-10,12-13,15-16H,2,5,8,11,14,17-19H2,1H3,(H,21,22)	5.969	56.808	639	0.45	84	37.3	0.123	2
elaterinide	1398-78-3		HMDB0035893	5901827		FDB014678		C38H54O13	718.829	AFC001080	QKEJRKXVLGOJMB-UHFFFAOYSA-N	CC(=O)OC(C)(C)C=CC(=O)C(C)(C1C(CC2(C)C3CC=C4C(C=C(C(=O)C4(C)C)OC5C(C(C(C(CO)O5)O)O)O)C3(C)C(=O)CC12C)O)O	InChI=1S/C38H54O13/c1-18(40)51-33(2,3)13-12-25(42)38(9,48)30-21(41)15-35(6)24-11-10-19-20(37(24,8)26(43)16-36(30,35)7)14-22(31(47)34(19,4)5)49-32-29(46)28(45)27(44)23(17-39)50-32/h10,12-14,20-21,23-24,27-30,32,39,41,44-46,48H,11,15-17H2,1-9H3	0.003	113.313	1686	0.737	294	217.35	0.303	3
ent-7alpha-hydroxykaur-16-en-19-oate				25200352	57298			[C20H29O3]-	317.443	AFC001299	KMLXVEXJZSTMBV-UHFFFAOYSA-M	C=C1CC23CC1CCC3C4(C)CCCC(C)(C4CC2O)C(=O)[O-]	InChI=1S/C20H30O3/c1-12-10-20-11-13(12)5-6-14(20)18(2)7-4-8-19(3,17(22)23)15(18)9-16(20)21/h13-16,21H,1,4-11H2,2-3H3,(H,22,23)/p-1	2.971	56.943	345	0.85	140	60.36	0.19	0
ent-copalyl diphosphate	21738-30-7	C06089		5280897	28151	FDB001467	LMPR0104030001	C20H36O7P2	450.444	AFC000920	JCAIWDXKLCEQEO-UHFFFAOYSA-N	CC(=CCOP(=O)(O)OP(=O)(O)O)CCC1C(=C)CCC2C(C)(C)CCCC12C	InChI=1S/C20H36O7P2/c1-15(11-14-26-29(24,25)27-28(21,22)23)7-9-17-16(2)8-10-18-19(3,4)12-6-13-20(17,18)5/h11,17-18H,2,6-10,12-14H2,1,3-5H3,(H,24,25)(H2,21,22,23)	3.869	72.079	678	0.8	154	132.91	0.295	0
ent-isokaurene		C20145		12311059	50783			C20H32	272.469	AFC001198	DQUHDYWUEKWRLN-UHFFFAOYSA-N	CC1=CC23CCC4C(C)(C)CCCC4(C)C3CCC1C2	InChI=1S/C20H32/c1-14-12-20-11-8-16-18(2,3)9-5-10-19(16,4)17(20)7-6-15(14)13-20/h12,15-17H,5-11,13H2,1-4H3	5.578	56.537	278	0.9	124	0	0	1
ent-kaur-16-en-19-oate				25200785	57297			[C20H29O2]-	301.444	AFC001302	NIKHGUQULKYIGE-UHFFFAOYSA-M	C=C1CC23CCC4C(C)(CCCC4(C)C(=O)[O-])C3CCC1C2	InChI=1S/C20H30O2/c1-13-11-20-10-7-15-18(2,16(20)6-5-14(13)12-20)8-4-9-19(15,3)17(21)22/h14-16H,1,4-12H2,2-3H3,(H,21,22)/p-1	4.073	56.141	334	0.85	134	40.13	0.133	1
ent-kaurenal	14046-84-5	C11873	HMDB0036728	443466	29609	FDB030847	LMPR0104130005	C20H30O	286.452	AFC000758	JCAVDWHQNFTFBW-UHFFFAOYSA-N	C=C1CC23CCC4C(C)(CCCC4(C)C3CCC1C2)C=O	InChI=1S/C20H30O/c1-14-11-20-10-7-16-18(2,13-21)8-4-9-19(16,3)17(20)6-5-15(14)12-20/h13,15-17H,1,4-12H2,2-3H3	4.798	56.006	317	0.85	128	17.07	0.06	1
ent-kaurene	562-28-7	C06090	HMDB0035394	11966109	15415	FDB030848	LMPR0104130002	C20H32	272.469	AFC001177	ONVABDHFQKWOSV-UHFFFAOYSA-N	C=C1CC23CCC4C(C)(C)CCCC4(C)C3CCC1C2	InChI=1S/C20H32/c1-14-12-20-11-8-16-18(2,3)9-5-10-19(16,4)17(20)7-6-15(14)13-20/h15-17H,1,5-13H2,2-4H3	5.632	56.537	278	0.9	124	0	0	1
ent-kaurenol	2300-11-0	C11872		443465	29611	FDB030849	LMPR0104130003	C20H32O	288.468	AFC000757	TUJQVRFWMWRMIO-UHFFFAOYSA-N	C=C1CC23CCC4C(C)(CCCC4(C)C3CCC1C2)CO	InChI=1S/C20H32O/c1-14-11-20-10-7-16-18(2,13-21)8-4-9-19(16,3)17(20)6-5-15(14)12-20/h15-17,21H,1,4-13H2,2-3H3	4.542	57.339	317	0.9	128	20.23	0.07	1
episterol	474-68-0	C15777	HMDB0006847	5283662	23929	FDB024116	LMST01030115	C28H46O	398.665	AFC000985	BTCAEOLDEYPGGE-UHFFFAOYSA-N	CC(C)C(=C)CCC(C)C1CCC2C3=CCC4CC(CCC4(C)C3CCC12C)O	InChI=1S/C28H46O/c1-18(2)19(3)7-8-20(4)24-11-12-25-23-10-9-21-17-22(29)13-15-27(21,5)26(23)14-16-28(24,25)6/h10,18,20-22,24-26,29H,3,7-9,11-17H2,1-2,4-6H3	7.432	80.754	696	0.857	164	20.23	0.051	1
episterone		C22122		14826704		FDB030850		C28H44O	396.649	AFC001227	XFPWUGLDJACLNZ-UHFFFAOYSA-N	CC(C)C(=C)CCC(C)C1CCC2C3=CCC4CC(=O)CCC4(C)C3CCC12C	InChI=1S/C28H44O/c1-18(2)19(3)7-8-20(4)24-11-12-25-23-10-9-21-17-22(29)13-15-27(21,5)26(23)14-16-28(24,25)6/h10,18,20-21,24-26H,3,7-9,11-17H2,1-2,4-6H3	7.106	79.421	696	0.821	164	17.07	0.043	1
epsilon,epsilon-carotene-3-diol	28840-14-4		HMDB0002193	5471691	145971	FDB015932	LMPR01070197	C40H52O2	564.841	AFC001670	IMFOMPZKWQBDLQ-UHFFFAOYSA-N	CC(=CC=CC=C(C)C=CC=C(C)C=CC1C(=CC(=O)CC1(C)C)C)C=CC=C(C)C=CC2C(=CC(=O)CC2(C)C)C	InChI=1S/C40H52O2/c1-29(17-13-19-31(3)21-23-37-33(5)25-35(41)27-39(37,7)8)15-11-12-16-30(2)18-14-20-32(4)22-24-38-34(6)26-36(42)28-40(38,9)10/h11-26,37-38H,27-28H2,1-10H3	9.327	106.677	1830	0.4	206	34.14	0.06	2
epsilon-carotene	38894-81-4	C16276		446439	32549	FDB004662	LMPR01070126	C40H56	536.874	AFC000782	QABFXOMOOYWZLZ-UHFFFAOYSA-N	CC(=CC=CC=C(C)C=CC=C(C)C=CC1C(=CCCC1(C)C)C)C=CC=C(C)C=CC2C(=CCCC2(C)C)C	InChI=1S/C40H56/c1-31(19-13-21-33(3)25-27-37-35(5)23-15-29-39(37,7)8)17-11-12-18-32(2)20-14-22-34(4)26-28-38-36(6)24-16-30-40(38,9)10/h11-14,17-28,37-38H,15-16,29-30H2,1-10H3	11.609	107.74	1642	0.45	194	0	0	2
eriodictyol	552-58-9	C05631	HMDB0005810	440735	28412	FDB011936	LMPK12140002	C15H12O6	288.253	AFC000721	SBHXYTNGIZCORC-UHFFFAOYSA-N	C1=C(C=C(C(=C1)O)O)C2CC(=O)C3=C(C=C(C=C3O)O)O2	InChI=1S/C15H12O6/c16-8-4-11(19)15-12(20)6-13(21-14(15)5-8)7-1-2-9(17)10(18)3-7/h1-5,13,16-19H,6H2	-0.717	39.214	355	0.133	114	107.22	0.372	0
eriodictyol 7-glucoside	38965-51-4		HMDB0029544	134693055	139458	FDB000689	LMPK12140362	C21H22O11	450.394	AFC001542	RAFHNDRXYHOLSH-UHFFFAOYSA-N	C1=C(C=C(C(=C1)O)O)C2CC(=O)C3=C(C=C(C=C3O)OC4C(C(C(C(CO)O4)O)O)O)O2	InChI=1S/C21H22O11/c22-7-16-18(27)19(28)20(29)21(32-16)30-9-4-12(25)17-13(26)6-14(31-15(17)5-9)8-1-2-10(23)11(24)3-8/h1-5,14,16,18-25,27-29H,6-7H2	-2.808	60.451	797	0.381	174	186.37	0.414	2
erucic acid	112-86-7	C08316	HMDB0002068	5281116	28792	FDB004287	LMFA01030089	C22H42O2	338.569	AFC000924	DPUOLQHDNGRHBS-UHFFFAOYSA-N	CCCCCCCCC=CCCCCCCCCCCCC(=O)O	InChI=1S/C22H42O2/c1-2-3-4-5-6-7-8-9-10-11-12-13-14-15-16-17-18-19-20-21-22(23)24/h9-10H,2-8,11-21H2,1H3,(H,23,24)	8.66	68.329	769	0.864	92	37.3	0.11	2
erythrodiol	545-48-2	C20945	HMDB0002360	101761	67939	FDB013011		C30H50O2	442.718	AFC001779	PSZDOEIIIJFCFE-UHFFFAOYSA-N	CC1(C)CCC2(CCC3(C)C(=CCC4C5(C)CCC(C(C)(C)C5CCC43C)O)C2C1)CO	InChI=1S/C30H50O2/c1-25(2)14-16-30(19-31)17-15-28(6)20(21(30)18-25)8-9-23-27(5)12-11-24(32)26(3,4)22(27)10-13-29(23,28)7/h8,21-24,31-32H,9-19H2,1-7H3	6.213	87.744	650	0.933	198	40.46	0.091	1
ethenylbenzene	100-42-5	C19506	HMDB0034240	7501	27452	FDB012552		C8H8	104.149	AFC000284	PPBRXRYQALVLMV-UHFFFAOYSA-N	C=CC1=CC=CC=C1	InChI=1S/C8H8/c1-2-8-6-4-3-5-7-8/h2-7H,1H2	1.915	19.414	60	0	34	0	0	0
ethyl 2-methylbutyrate	7452-79-1		HMDB0033745	24020	88452	FDB011877	LMFA07010506	C7H14O2	130.185	AFC000389	HCRBXQFHJMCTLF-UHFFFAOYSA-N	CCC(C)C(=O)OCC	InChI=1S/C7H14O2/c1-4-6(3)7(8)9-5-2/h6H,4-5H2,1-3H3	1.956	23.259	70	0.857	34	26.3	0.202	0
ethyl 3,4-dihydroxybenzoate	3943-89-3			77547	132364			C9H10O4	182.174	AFC001866	KBPUBCVJHFXPOC-UHFFFAOYSA-N	CCOC(=O)C1=CC=C(C(=C1)O)O	InChI=1S/C9H10O4/c1-2-13-9(12)6-3-4-7(10)8(11)5-6/h3-5,10-11H,2H2,1H3	0.442	25.716	153	0.222	60	66.76	0.367	0
ethyl acetate	141-78-6	C00849	HMDB0031217	8857	27750	FDB003240		C4H8O2	88.1053	AFC000315	XEKOWRVHYACXOJ-UHFFFAOYSA-N	CCOC(=O)C	InChI=1S/C4H8O2/c1-3-6-4(2)5/h3H2,1-2H3	0.37	13.978	31	0.75	20	26.3	0.299	0
ethyl butyrate	105-54-4		HMDB0033889	7762	88764	FDB012082	LMFA07010874	C6H12O2	116.159	AFC000288	OBNCKNCVKJNDBV-UHFFFAOYSA-N	CCCC(=O)OCC	InChI=1S/C6H12O2/c1-3-5-6(7)8-4-2/h3-5H2,1-2H3	1.493	20.166	61	0.833	28	26.3	0.227	0
ethyl decanoate	110-38-3		HMDB0030998	8048	87430	FDB002986	LMFA07010455	C12H24O2	200.318	AFC000295	RGXWDWUGBIJHDO-UHFFFAOYSA-N	CCCCCCCCCC(=O)OCC	InChI=1S/C12H24O2/c1-3-5-6-7-8-9-10-11-12(13)14-4-2/h3-11H2,1-2H3	4.23	38.727	235	0.917	52	26.3	0.131	0
ethyl hexanoate	123-66-0		HMDB0040209	31265	86055	FDB019921	LMFA07010434	C8H16O2	144.212	AFC000410	SHZIWNPUGXLXDT-UHFFFAOYSA-N	CCCCCC(=O)OCC	InChI=1S/C8H16O2/c1-3-5-6-7-8(9)10-4-2/h3-7H2,1-2H3	2.405	26.353	107	0.875	36	26.3	0.182	0
ethyl isobutyrate	97-62-1		HMDB0031248	7342	87303	FDB003278	LMFA07010503	C6H12O2	116.159	AFC000275	WDAXFOBOLVPGLV-UHFFFAOYSA-N	CCOC(=O)C(C)C	InChI=1S/C6H12O2/c1-4-8-6(7)5(2)3/h5H,4H2,1-3H3	1.499	20.166	54	0.833	30	26.3	0.227	0
ethyl laurate	106-33-2		HMDB0033788	7800	87427	FDB011947	LMFA07010464	C14H28O2	228.371	AFC000290	MMXKVMNBHPAILY-UHFFFAOYSA-N	CCCCCCCCCCCC(=O)OCC	InChI=1S/C14H28O2/c1-3-5-6-7-8-9-10-11-12-13-14(15)16-4-2/h3-13H2,1-2H3	5.143	44.914	317	0.929	60	26.3	0.115	2
ethyl octanoate	106-32-1	C12292	HMDB0040195	7799	87426	FDB019907	LMFA07010447	C10H20O2	172.265	AFC000289	YYZUSRORWSJGET-UHFFFAOYSA-N	CCCCCCCC(=O)OCC	InChI=1S/C10H20O2/c1-3-5-6-7-8-9-10(11)12-4-2/h3-9H2,1-2H3	3.318	32.54	165	0.9	44	26.3	0.153	0
ethyl propionate	105-37-3		HMDB0030058	7749	41330	FDB001366	LMFA07010411	C5H10O2	102.132	AFC000287	FKRCODPIKNYEAC-UHFFFAOYSA-N	CCC(=O)OCC	InChI=1S/C5H10O2/c1-3-5(6)7-4-2/h3-4H2,1-2H3	1.037	17.072	45	0.8	24	26.3	0.258	0
ethyl propyl disulfide	30453-31-7		HMDB0033053	35349		FDB011046		C5H12S2	136.281	AFC000415	SNGRPWPVGSSZGV-UHFFFAOYSA-N	CCCSSCC	InChI=1S/C5H12S2/c1-3-5-7-6-4-2/h3-5H2,1-2H3	2.607	22.602	54	1	22	50.6	0.372	0
ethyl vinyl ketone	1629-58-9		HMDB0031607	15394	89945	FDB008243	LMFA12000069	C5H8O	84.1166	AFC000369	JLIDVCMBCGBIEY-UHFFFAOYSA-N	C=CC(=O)CC	InChI=1S/C5H8O/c1-3-5(6)4-2/h3H,1,4H2,2H3	1.121	14.936	29	0.4	20	17.07	0.203	0
eucalyptol	470-82-6	C09844	HMDB0004472	2758	27961	FDB014616	LMPR0102090019	C10H18O	154.25	AFC000199	WEEGYLXZBRQIMU-UHFFFAOYSA-N	CC1(C)C2CCC(C)(CC2)O1	InChI=1S/C10H18O/c1-9(2)8-4-6-10(3,11-9)7-5-8/h8H,4-7H2,1-3H3	2.148	30.404	82	1	64	9.23	0.06	0
eugenol	97-53-0	C10453	HMDB0005809	3314	4917	FDB012171		C10H12O2	164.201	AFC001858	RRAFCDWBNXTKKO-UHFFFAOYSA-N	C=CCC1=CC=C(C(=C1)OC)O	InChI=1S/C10H12O2/c1-3-4-8-5-6-9(11)10(7-8)12-2/h3,5-7,11H,1,4H2,2H3	1.31	27.206	128	0.2	54	29.46	0.18	0
FAD	146-14-5	C00016	HMDB0001248	643975	16238	FDB022511		C27H33N9O15P2	785.551	AFC000823	VWWQXMAJTJZDQX-UHFFFAOYSA-N	CC1=CC2=C(C=C1C)N(CC(C(C(COP(=O)(O)OP(=O)(O)OCC3C(C(C(N4C=NC5=C4N=CN=C5N)O3)O)O)O)O)O)C6=NC(=O)NC(=O)C6=N2	InChI=1S/C27H33N9O15P2/c1-10-3-12-13(4-11(10)2)35(24-18(32-12)25(42)34-27(43)33-24)5-14(37)19(39)15(38)6-48-52(44,45)51-53(46,47)49-7-16-20(40)21(41)26(50-16)36-9-31-17-22(28)29-8-30-23(17)36/h3-4,8-9,14-16,19-21,26,37-41H,5-7H2,1-2H3,(H,44,45)(H,46,47)(H2,28,29,30)(H,34,42,43)	-5.122	98.714	2214	0.444	294	372.76	0.475	4
FADH2	1910-41-4	C01352	HMDB0001197	446013	17877	FDB030853		C27H35N9O15P2	787.567	AFC000780	YPZRHBJKEMOYQH-UHFFFAOYSA-N	CC1=C(C)C=C2C(=C1)NC3=C(NC(=O)NC3=O)N2CC(C(C(COP(=O)(O)OP(=O)(O)OCC4C(C(C(N5C=NC6=C5N=CN=C6N)O4)O)O)O)O)O	InChI=1S/C27H35N9O15P2/c1-10-3-12-13(4-11(10)2)35(24-18(32-12)25(42)34-27(43)33-24)5-14(37)19(39)15(38)6-48-52(44,45)51-53(46,47)49-7-16-20(40)21(41)26(50-16)36-9-31-17-22(28)29-8-30-23(17)36/h3-4,8-9,14-16,19-21,26,32,37-41H,5-7H2,1-2H3,(H,44,45)(H,46,47)(H2,28,29,30)(H2,33,34,42,43)	-5.532	100.048	2214	0.444	294	372.1	0.473	4
farnesyl acetone	762-29-8			1711945	67252			C18H30O	262.431	AFC000846	LTUMRKDLVGQMJU-UHFFFAOYSA-N	CC(=CCCC(=CCCC(=CCCC(=O)C)C)C)C	InChI=1S/C18H30O/c1-15(2)9-6-10-16(3)11-7-12-17(4)13-8-14-18(5)19/h9,11,13H,6-8,10,12,14H2,1-5H3	5.447	52.486	386	0.611	78	17.07	0.065	1
Fe(II)-nicotianamine				49859726		FDB030854		C12H21N3O6	303.312	AFC001425	KRGPXXHMOXVMMM-UHFFFAOYSA-N	C(C[NH2+]C(CC[NH+]1CCC1C(=O)[O-])C(=O)[O-])C(C(=O)[O-])[NH3+]	InChI=1S/C12H21N3O6/c13-7(10(16)17)1-4-14-8(11(18)19)2-5-15-6-3-9(15)12(20)21/h7-9,14H,1-6,13H2,(H,16,17)(H,18,19)(H,20,21)	-7.635	43.235	387	0.75	98	169.08	0.558	0
Fe(III)-[N-(2,3-dihydroxybenzoyl)-L-serine]3				134820260	143011			[C30H28N3O16]-	686.555	AFC001547	NTWRWGRCGVKQNS-UHFFFAOYSA-M	C1=CC(=C(C(=C1)C(=O)NC(CO)C(=O)OCC(C(=O)OCC(C(=O)[O-])NC(=O)C2=CC=CC(=C2O)O)NC(=O)C3=CC=CC(=C3O)O)O)O	InChI=1S/C30H29N3O16/c34-10-16(31-25(41)13-4-1-7-19(35)22(13)38)29(46)49-12-18(33-27(43)15-6-3-9-21(37)24(15)40)30(47)48-11-17(28(44)45)32-26(42)14-5-2-8-20(36)23(14)39/h1-9,16-18,34-40H,10-12H2,(H,31,41)(H,32,42)(H,33,43)(H,44,45)/p-1	-3.647	87.602	1569	0.2	244	321.64	0.469	4
fecosterol	516-86-9	C04525		440371	17038	FDB030856	LMST01030095	C28H46O	398.665	AFC000710	SLQKYSPHBZMASJ-UHFFFAOYSA-N	CC(C)C(=C)CCC(C)C1CCC2C3=C(CCC12C)C4(C)CCC(CC4CC3)O	InChI=1S/C28H46O/c1-18(2)19(3)7-8-20(4)24-11-12-25-23-10-9-21-17-22(29)13-15-27(21,5)26(23)14-16-28(24,25)6/h18,20-22,24-25,29H,3,7-17H2,1-2,4-6H3	7.626	80.754	696	0.857	164	20.23	0.051	1
ferulic acid	1135-24-6	C01494	HMDB0000954	445858	17620	FDB012801		C10H10O4	194.184	AFC000776	KSEBMYQBYZTDHS-UHFFFAOYSA-N	COC1=CC(=CC=C1O)C=CC(=O)O	InChI=1S/C10H10O4/c1-14-9-6-7(2-4-8(9)11)3-5-10(12)13/h2-6,11H,1H3,(H,12,13)	0.374	27.476	172	0.1	64	66.76	0.344	0
feruloyl-arabinofuranosylxylopyranose I								C21H28O13	488.44	AFC001683	BWGAOUMRGCPOIR-UHFFFAOYSA-N	COC1=CC(=CC=C1O)C=CC(=O)OC2C(C(CO)OC2OC3C(C(C(C(CO)O3)O)O)O)O	InChI=1S/C21H28O13/c1-30-11-6-9(2-4-10(11)24)3-5-14(25)33-19-16(27)13(8-23)32-21(19)34-20-18(29)17(28)15(26)12(7-22)31-20/h2-6,12-13,15-24,26-29H,7-8H2,1H3	-2.767	66.056	893	0.571	174	204.83	0.42	2
feruloyl-CoA		C00406		11966129	15511	FDB030861	LMFA07050392	C31H44N7O19P3S	943.705	AFC001182	GBXZVJQQDAJGSO-UHFFFAOYSA-N	CC(C)(COP(=O)(O)OP(=O)(O)OCC1C(C(C(N2C=NC3=C2N=CN=C3N)O1)O)OP(=O)(O)O)C(C(=O)NCCC(=O)NCCSC(=O)C=CC4=CC=C(C(=C4)OC)O)O	InChI=1S/C31H44N7O19P3S/c1-31(2,26(43)29(44)34-9-8-21(40)33-10-11-61-22(41)7-5-17-4-6-18(39)19(12-17)52-3)14-54-60(50,51)57-59(48,49)53-13-20-25(56-58(45,46)47)24(42)30(55-20)38-16-37-23-27(32)35-15-36-28(23)38/h4-7,12,15-16,20,24-26,30,39,42-43H,8-11,13-14H2,1-3H3,(H,33,40)(H,34,44)(H,48,49)(H,50,51)(H2,32,35,36)(H2,45,46,47)	-4.811	120.627	3311	0.484	316	444.54	0.471	4
folic acid	59-30-3	C00504	HMDB0000121	135398658	27470	FDB014504		C19H19N7O6	441.398	AFC001579	OVBPIULPVIDEAO-UHFFFAOYSA-N	C1=C(C=CC(=C1)NCC2=CN=C3C(=N2)C(=O)NC(=N3)N)C(=O)NC(CCC(=O)O)C(=O)O	InChI=1S/C19H19N7O6/c20-19-25-15-14(17(30)26-19)23-11(8-22-15)7-21-10-3-1-9(2-4-10)16(29)24-12(18(31)32)5-6-13(27)28/h1-4,8,12,21H,5-7H2,(H,24,29)(H,27,28)(H,31,32)(H3,20,22,25,26,30)	-2.035	58.621	986	0.211	162	207.93	0.471	2
fraxidin	525-21-3	C17479	HMDB0132247	3083616	81120	FDB012577		C11H10O5	222.195	AFC000857	QNFBKOHHLAWWTC-UHFFFAOYSA-N	COC1=CC2=C(C(=C1OC)O)OC(=O)C=C2	InChI=1S/C11H10O5/c1-14-7-5-6-3-4-8(12)16-10(6)9(13)11(7)15-2/h3-5,13H,1-2H3	-0.423	30.038	198	0.182	82	64.99	0.293	0
fructose	57-48-7	C02336	HMDB0000660	2723872	37714	FDB012528		C6H12O6	180.156	AFC000849	LKDRXBCSQODPBY-UHFFFAOYSA-N	C1C(C(C(C(CO)(O)O1)O)O)O	InChI=1S/C6H12O6/c7-2-6(11)5(10)4(9)3(8)1-12-6/h3-5,7-11H,1-2H2	-2.564	23.374	104	1	60	110.38	0.613	0
fructose-1-phosphate	15978-08-2	C01094	HMDB0001076	65246	18105	FDB022410		C6H13O9P	260.136	AFC000432	ZKLLSNQJRLJIGT-UHFFFAOYSA-N	C(C(C(C(C(=O)COP(=O)(O)O)O)O)O)O	InChI=1S/C6H13O9P/c7-1-3(8)5(10)6(11)4(9)2-15-16(12,13)14/h3,5-8,10-11H,1-2H2,(H2,12,13,14)	-3.504	30.076	206	0.833	72	174.56	0.671	1
fructose-6-phosphate	643-13-0	C00085	HMDB0000124	69507	15946	FDB021896		C6H13O9P	260.136	AFC000447	GSXOAOHZAIYLCY-UHFFFAOYSA-N	C(C(=O)C(C(C(COP(=O)(O)O)O)O)O)O	InChI=1S/C6H13O9P/c7-1-3(8)5(10)6(11)4(9)2-15-16(12,13)14/h4-7,9-11H,1-2H2,(H2,12,13,14)	-3.504	30.076	206	0.833	72	174.56	0.671	1
fucosterol	481-14-1	C08821	HMDB0002374	5281326	27865	FDB012493	LMST01040145	C29H48O	412.692	AFC000939	OSELKOCHBMDKEJ-UHFFFAOYSA-N	CC=C(CCC(C)C1CCC2C3CC=C4CC(CCC4(C)C3CCC12C)O)C(C)C	InChI=1S/C29H48O/c1-7-21(19(2)3)9-8-20(4)25-12-13-26-24-11-10-22-18-23(30)14-16-28(22,5)27(24)15-17-29(25,26)6/h7,10,19-20,23-27,30H,8-9,11-18H2,1-6H3	7.834	83.848	725	0.862	168	20.23	0.049	1
fumarate	142-42-7	C00122	HMDB0000134	5460307	29806	FDB030865		[C4H2O4]2-	114.056	AFC001053	VZCYOOQTPOCHFL-UHFFFAOYSA-L	C(=CC(=O)[O-])C(=O)[O-]	InChI=1S/C4H4O4/c5-3(6)1-2-4(7)8/h1-2H,(H,5,6)(H,7,8)/p-2	-1.367	11.582	56	0	30	80.26	0.704	0
fumaric acid	110-17-8	C00122	HMDB0000134	444972	18012	FDB003291		C4H4O4	116.072	AFC000767	VZCYOOQTPOCHFL-UHFFFAOYSA-N	C(=CC(=O)O)C(=O)O	InChI=1S/C4H4O4/c5-3(6)1-2-4(7)8/h1-2H,(H,5,6)(H,7,8)	-0.012	12.915	56	0	30	74.6	0.643	0
furfural	98-01-1	C14279	HMDB0032914	7362	34768	FDB004219		C5H4O2	96.0843	AFC000276	HYBBIBNJHNGZAN-UHFFFAOYSA-N	C1=COC(=C1)C=O	InChI=1S/C5H4O2/c6-4-5-2-1-3-7-5/h1-4H	-0.379	13.071	44	0	30	26.3	0.274	0
gadoleic acid	29204-02-2		HMDB0062436	5282767	32419	FDB003771	LMFA01030084	C20H38O2	310.515	AFC000968	LQJBNNIYVWPHFW-UHFFFAOYSA-N	CCCCCCCCCCC=CCCCCCCCC(=O)O	InChI=1S/C20H38O2/c1-2-3-4-5-6-7-8-9-10-11-12-13-14-15-16-17-18-19-20(21)22/h11-12H,2-10,13-19H2,1H3,(H,21,22)	7.748	62.142	639	0.85	84	37.3	0.12	2
galactinol	3687-64-7	C01235	HMDB0005826	11727586	17505	FDB001147		C12H22O11	342.297	AFC001167	VCWMRQDBPZKXKG-UHFFFAOYSA-N	C(C1C(C(C(C(O1)OC2C(C(C(C(C2O)O)O)O)O)O)O)O)O	InChI=1S/C12H22O11/c13-1-2-3(14)4(15)10(21)12(22-2)23-11-8(19)6(17)5(16)7(18)9(11)20/h2-21H,1H2	-4.811	44.611	372	1	120	200.53	0.586	2
galactitol	608-66-2	C01697	HMDB0000107	11850	16813	FDB006453		C6H14O6	182.172	AFC000212	FBPFZTCFMRRESA-UHFFFAOYSA-N	C(C(C(C(C(CO)O)O)O)O)O	InChI=1S/C6H14O6/c7-1-3(9)5(11)6(12)4(10)2-8/h3-12H,1-2H2	-2.94	24.707	114	1	50	121.38	0.667	1
galactosylglycerol	16232-91-0	C05401	HMDB0006790	656504;16048618	15754;150213	FDB024079		C9H18O8	254.235	AFC001242	NHJUPBDCSOGIKX-UHFFFAOYSA-N	C(C(COC1C(C(C(C(CO)O1)O)O)O)O)O	InChI=1S/C9H18O8/c10-1-4(12)3-16-9-8(15)7(14)6(13)5(2-11)17-9/h4-15H,1-3H2	-3.155	34.258	236	1	80	139.84	0.55	1
gallic acid	149-91-7	C01424	HMDB0005807	370	30778	FDB000662		C7H6O5	170.12	AFC000060	LNTHITQWFMADLM-UHFFFAOYSA-N	C1=C(C(=C(C=C1C(=O)O)O)O)O	InChI=1S/C7H6O5/c8-4-1-3(7(11)12)2-5(9)6(4)10/h1-2,8-10H,(H,11,12)	-0.721	20.331	110	0	58	97.99	0.576	0
gamma-carotene	472-93-5	C05435	HMDB0112262	5280791	27740	FDB014328	LMPR01070260	C40H56	536.874	AFC000911	HRQKOYFGHJYEFS-UHFFFAOYSA-N	CC(=CCCC(=CC=CC(=CC=CC(=CC=CC=C(C)C=CC=C(C)C=CC1=C(C)CCCC1(C)C)C)C)C)C	InChI=1S/C40H56/c1-32(2)18-13-21-35(5)24-15-26-36(6)25-14-22-33(3)19-11-12-20-34(4)23-16-27-37(7)29-30-39-38(8)28-17-31-40(39,9)10/h11-12,14-16,18-20,22-27,29-30H,13,17,21,28,31H2,1-10H3	12.38	107.74	1748	0.4	182	0	0	3
gamma-dodecalactone	2305-05-7		HMDB0031683	16821	143727	FDB016744	LMFA07040042	C12H22O2	198.302	AFC001875	WGPCZPLRVAWXPW-UHFFFAOYSA-N	CCCCCCCCC1CCC(=O)O1	InChI=1S/C12H22O2/c1-2-3-4-5-6-7-8-11-9-10-12(13)14-11/h11H,2-10H2,1H3	3.915	37.393	238	0.917	60	26.3	0.133	0
gamma-ergostenol				91746604		FDB005851		C28H48O	400.681	AFC001503	PUGBZUWUTZUUCP-UHFFFAOYSA-N	CC(C)C(C)CCC(C)C1CCC2C3=CCC4CC(CCC4(C)C3CCC12C)O	InChI=1S/C28H48O/c1-18(2)19(3)7-8-20(4)24-11-12-25-23-10-9-21-17-22(29)13-15-27(21,5)26(23)14-16-28(24,25)6/h10,18-22,24-26,29H,7-9,11-17H2,1-6H3	7.628	82.088	696	0.929	164	20.23	0.051	1
gamma-nonalactone	104-61-0		HMDB0031531	7710		FDB008138	LMFA07040021	C9H16O2	156.222	AFC000285	OALYTRUKMRCXNH-UHFFFAOYSA-N	CCCCCC1CCC(=O)O1	InChI=1S/C9H16O2/c1-2-3-4-5-8-6-7-9(10)11-8/h8H,2-7H2,1H3	2.546	28.113	134	0.889	48	26.3	0.168	0
gamma-tocopherol	54-28-4	C02483	HMDB0001492	92729	18185	FDB002431	LMPR02020065	C28H48O2	416.681	AFC000482	QUEDXNHFTDJVIY-UHFFFAOYSA-N	CC(C)CCCC(C)CCCC(C)CCCC1(C)CCC2=C(C(=C(C)C(=C2)O)C)O1	InChI=1S/C28H48O2/c1-20(2)11-8-12-21(3)13-9-14-22(4)15-10-17-28(7)18-16-25-19-26(29)23(5)24(6)27(25)30-28/h19-22,29H,8-18H2,1-7H3	8.605	82.89	910	0.786	148	29.46	0.071	2
gastrodin		C16964		115067	80828			C13H18O7	286.278	AFC001798	PUQSUZTXKPLAPR-UHFFFAOYSA-N	C1=C(C=CC(=C1)O[C@H]2[C@@H]([C@H]([C@@H]([C@@H](CO)O2)O)O)O)CO	InChI=1S/C13H18O7/c14-5-7-1-3-8(4-2-7)19-13-12(18)11(17)10(16)9(6-15)20-13/h1-4,9-18H,5-6H2	-1.895	40.496	354	0.538	100	119.61	0.418	0
GDP-4-keto-6-deoxymannose	18186-48-6	C01222	HMDB0001346	135398621	16955	FDB022568		C16H23N5O15P2	587.327	AFC001564	PNHLMHWWFOPQLK-UHFFFAOYSA-N	CC1C(=O)C(C(C(O1)OP(=O)(O)OP(=O)(O)OCC2C(C(C(N3C=NC4=C3N=C(N)NC4=O)O2)O)O)O)O	InChI=1S/C16H23N5O15P2/c1-4-7(22)9(24)11(26)15(33-4)35-38(30,31)36-37(28,29)32-2-5-8(23)10(25)14(34-5)21-3-18-6-12(21)19-16(17)20-13(6)27/h3-5,8-11,14-15,23-26H,2H2,1H3,(H,28,29)(H,30,31)(H3,17,19,20,27)	-5.194	68.286	1155	0.625	210	321.44	0.548	3
GDP-beta-L-fucose	15839-70-0	C00325	HMDB0062554	135398655	13332	FDB021816		C16H25N5O15P2	589.342	AFC001577	LQEBEXMHBLQMDB-UHFFFAOYSA-N	CC1C(C(C(C(O1)OP(=O)(O)OP(=O)(O)OCC2C(C(C(N3C=NC4=C3N=C(N)NC4=O)O2)O)O)O)O)O	InChI=1S/C16H25N5O15P2/c1-4-7(22)9(24)11(26)15(33-4)35-38(30,31)36-37(28,29)32-2-5-8(23)10(25)14(34-5)21-3-18-6-12(21)19-16(17)20-13(6)27/h3-5,7-11,14-15,22-26H,2H2,1H3,(H,28,29)(H,30,31)(H3,17,19,20,27)	-5.441	69.62	1155	0.688	210	324.6	0.551	3
GDP-glucose	5750-57-2	C00394	HMDB0003351	135398625	62254	FDB023150		C16H25N5O16P2	605.342	AFC001565	MVMSCBBUIHUTGJ-UHFFFAOYSA-N	C(C1C(C(C(C(O1)OP(=O)(O)OP(=O)(O)OCC2C(C(C(N3C=NC4=C3N=C(N)NC4=O)O2)O)O)O)O)O)O	InChI=1S/C16H25N5O16P2/c17-16-19-12-6(13(28)20-16)18-3-21(12)14-10(26)8(24)5(34-14)2-33-38(29,30)37-39(31,32)36-15-11(27)9(25)7(23)4(1-22)35-15/h3-5,7-11,14-15,22-27H,1-2H2,(H,29,30)(H,31,32)(H3,17,19,20,28)	-6.329	70.422	1190	0.688	214	344.83	0.57	3
GDP-L-galactose	6815-91-4	C02280		135515358	18038	FDB030877		C16H25N5O16P2	605.342	AFC001565	MVMSCBBUIHUTGJ-UHFFFAOYSA-N	C(C1C(C(C(C(O1)OP(=O)(O)OP(=O)(O)OCC2C(C(C(N3C=NC4=C3N=C(N)NC4=O)O2)O)O)O)O)O)O	InChI=1S/C16H25N5O16P2/c17-16-19-12-6(13(28)20-16)18-3-21(12)14-10(26)8(24)5(34-14)2-33-38(29,30)37-39(31,32)36-15-11(27)9(25)7(23)4(1-22)35-15/h3-5,7-11,14-15,22-27H,1-2H2,(H,29,30)(H,31,32)(H3,17,19,20,28)	-6.329	70.422	1190	0.688	214	344.83	0.57	3
GDP-L-gulose		C15925		135803997	80182			C16H25N5O16P2	605.342	AFC001565	MVMSCBBUIHUTGJ-UHFFFAOYSA-N	C(C1C(C(C(C(O1)OP(=O)(O)OP(=O)(O)OCC2C(C(C(N3C=NC4=C3N=C(N)NC4=O)O2)O)O)O)O)O)O	InChI=1S/C16H25N5O16P2/c17-16-19-12-6(13(28)20-16)18-3-21(12)14-10(26)8(24)5(34-14)2-33-38(29,30)37-39(31,32)36-15-11(27)9(25)7(23)4(1-22)35-15/h3-5,7-11,14-15,22-27H,1-2H2,(H,29,30)(H,31,32)(H3,17,19,20,28)	-6.329	70.422	1190	0.688	214	344.83	0.57	3
geraniol	106-24-1	C01500	HMDB0035155	637566	17447	FDB013792	LMPR0102010016	C10H18O	154.25	AFC000808	GLZPCOQZEFWAFX-UHFFFAOYSA-N	CC(=CCCC(=CCO)C)C	InChI=1S/C10H18O/c1-9(2)5-4-6-10(3)7-8-11/h5,7,11H,4,6,8H2,1-3H3	2.934	30.404	122	0.6	42	20.23	0.131	0
geranyl diphosphate	763-10-0	C00341	HMDB0001285	445995	17211	FDB001463	LMPR0102010001	C10H20O7P2	314.21	AFC000779	GVVPGTZRZFNKDS-UHFFFAOYSA-N	CC(=CCCC(=CCOP(=O)(O)OP(=O)(O)O)C)C	InChI=1S/C10H20O7P2/c1-9(2)5-4-6-10(3)7-8-16-19(14,15)17-18(11,12)13/h5,7H,4,6,8H2,1-3H3,(H,14,15)(H2,11,12,13)	1.314	43.81	338	0.6	86	132.91	0.423	0
geranylacetone	3796-70-1	C13297	HMDB0031846	1549778	67206	FDB008529	LMFA11000696	C13H22O	194.314	AFC000844	HNZUNIKWNYHEJJ-UHFFFAOYSA-N	CC(=CCCC(=CCCC(=O)C)C)C	InChI=1S/C13H22O/c1-11(2)7-5-8-12(3)9-6-10-13(4)14/h7,9H,5-6,8,10H2,1-4H3	3.62	38.351	199	0.615	56	17.07	0.088	0
geranylgeranyl diphosphate	6699-20-3	C00353	HMDB0004486	447277	48861	FDB023377	LMPR0104010001	C20H36O7P2	450.444	AFC000788	OINNEUNVOZHBOX-UHFFFAOYSA-N	CC(=CCCC(=CCCC(=CCCC(=CCOP(=O)(O)OP(=O)(O)O)C)C)C)C	InChI=1S/C20H36O7P2/c1-17(2)9-6-10-18(3)11-7-12-19(4)13-8-14-20(5)15-16-26-29(24,25)27-28(21,22)23/h9,11,13,15H,6-8,10,12,14,16H2,1-5H3,(H,24,25)(H2,21,22,23)	4.967	72.079	868	0.6	130	132.91	0.295	1
germacrene B	15423-57-1	C09672	HMDB0036575	5281519	5337	FDB015483	LMPR0103090007	C15H24	204.352	AFC000944	GXEGJTGWYVZSNR-UHFFFAOYSA-N	CC(=C1CCC(=CCCC(=CC1)C)C)C	InChI=1S/C15H24/c1-12(2)15-10-8-13(3)6-5-7-14(4)9-11-15/h6,9H,5,7-8,10-11H2,1-4H3	5.47	42.403	171	0.6	68	0	0	1
gibberellic acid	77-06-5	C01699	HMDB0003559	6466	28833	FDB005727		C19H22O6	346.375	AFC001835	IXORZMNAPKEEDV-UHFFFAOYSA-N	C=C1C[C@]23C[C@]1(CC[C@H]2[C@]45C=C[C@@H]([C@](C)([C@H]4[C@@H]3C(=O)O)C(=O)O5)O)O	InChI=1S/C19H22O6/c1-9-7-17-8-18(9,24)5-3-10(17)19-6-4-11(20)16(2,15(23)25-19)13(19)12(17)14(21)22/h4,6,10-13,20,24H,1,3,5,7-8H2,2H3,(H,21,22)	0.417	52.921	351	0.684	162	104.06	0.301	0
gibberellin A1	545-97-1	C00859		5280379	27717	FDB015848	LMPR0104170001	C19H24O6	348.391	AFC000874	JLJLRLWOEMWYQK-UHFFFAOYSA-N	C=C1CC23CC1(CCC2C45CCC(C(C)(C4C3C(=O)O)C(=O)O5)O)O	InChI=1S/C19H24O6/c1-9-7-17-8-18(9,24)5-3-10(17)19-6-4-11(20)16(2,15(23)25-19)13(19)12(17)14(21)22/h10-13,20,24H,1,3-8H2,2H3,(H,21,22)	0.592	54.255	351	0.789	162	104.06	0.299	0
gibberellin A110			HMDB0032010	25243953	133478	FDB008708		[C20H26O5]2-	346.418	AFC001326	SFGDEUSMQMGAFH-UHFFFAOYSA-L	C=C1CC23CC1CCC3C4(C)CC(CC(C)(C4C2C(=O)[O-])C(=O)[O-])O	InChI=1S/C20H28O5/c1-10-6-20-7-11(10)4-5-13(20)18(2)8-12(21)9-19(3,17(24)25)15(18)14(20)16(22)23/h11-15,21H,1,4-9H2,2-3H3,(H,22,23)(H,24,25)/p-2	0.861	56.547	346	0.8	152	100.49	0.29	0
gibberellin A12	1164-45-0	C11857		443450	30088	FDB013659	LMPR0104170014	C20H28O4	332.435	AFC000752	UJFQJDAESQJXTG-UHFFFAOYSA-N	C=C1CC23CC1CCC3C4(C)CCCC(C)(C4C2C(=O)O)C(=O)O	InChI=1S/C20H28O4/c1-11-9-20-10-12(11)5-6-13(20)18(2)7-4-8-19(3,17(23)24)15(18)14(20)16(21)22/h12-15H,1,4-10H2,2-3H3,(H,21,22)(H,23,24)	3.454	57.078	323	0.8	146	74.6	0.225	0
gibberellin A12 aldehyde	19436-07-8	C06093	HMDB0039484	5459783	15610	FDB019088	LMPR0104170040	C20H28O3	316.435	AFC001040	ZCTUNYRXJKLWPY-UHFFFAOYSA-N	C=C1CC23CC1CCC3C4(C)CCCC(C)(C4C2C=O)C(=O)O	InChI=1S/C20H28O3/c1-12-9-20-10-13(12)5-6-15(20)18(2)7-4-8-19(3,17(22)23)16(18)14(20)11-21/h11,13-16H,1,4-10H2,2-3H3,(H,22,23)	3.501	56.276	312	0.8	140	54.37	0.172	1
gibberellin A13				10883375	72598	FDB013661		C20H26O7	378.417	AFC001154	UYRCHWLYXIQJKK-UHFFFAOYSA-N	C=C1CC23CC1CCC2C4(CCC(C(C)(C4C3C(=O)O)C(=O)O)O)C(=O)O	InChI=1S/C20H26O7/c1-9-7-19-8-10(9)3-4-11(19)20(17(26)27)6-5-12(21)18(2,16(24)25)14(20)13(19)15(22)23/h10-14,21H,1,3-8H2,2H3,(H,22,23)(H,24,25)(H,26,27)	1.47	58.151	364	0.75	162	132.13	0.349	0
gibberellin A15 (open lactone form)	88373-66-4	C11860		25245948	143956	FDB030868		[C20H26O5]2-	346.418	AFC001354	TZGXVFYTKTWKCU-UHFFFAOYSA-L	C=C1CC23CC1CCC3C4(CCCC(C)(C4C2C(=O)[O-])C(=O)[O-])CO	InChI=1S/C20H28O5/c1-11-8-20-9-12(11)4-5-13(20)19(10-21)7-3-6-18(2,17(24)25)15(19)14(20)16(22)23/h12-15,21H,1,3-10H2,2H3,(H,22,23)(H,24,25)/p-2	1.007	56.547	336	0.8	150	100.49	0.29	0
gibberellin A17	18411-79-5		HMDB0036897	5460657	24236	FDB015858	LMPR0104170034	C20H26O7	378.417	AFC001061	AUKMHZZVLPQAOX-UHFFFAOYSA-N	C=C1CC23CC1(CCC2C4(CCCC(C)(C4C3C(=O)O)C(=O)O)C(=O)O)O	InChI=1S/C20H26O7/c1-10-8-18-9-19(10,27)7-4-11(18)20(16(25)26)6-3-5-17(2,15(23)24)13(20)12(18)14(21)22/h11-13,27H,1,3-9H2,2H3,(H,21,22)(H,23,24)(H,25,26)	1.491	58.151	364	0.75	164	132.13	0.349	0
gibberellin A19	6980-44-5	C02034	HMDB0036896	5460209	28731	FDB015856	LMPR0104170039	C20H26O6	362.418	AFC001049	VNCQCPQAMDQEBY-UHFFFAOYSA-N	C=C1CC23CC1(CCC3C4(CCCC(C)(C4C2C(=O)O)C(=O)O)C=O)O	InChI=1S/C20H26O6/c1-11-8-19-9-20(11,26)7-4-12(19)18(10-21)6-3-5-17(2,16(24)25)14(18)13(19)15(22)23/h10,12-14,26H,1,3-9H2,2H3,(H,22,23)(H,24,25)	1.538	57.349	351	0.75	158	111.9	0.309	0
gibberellin A20	19143-87-4	C02035		5280481	27742	FDB013667	LMPR0104170004	C19H24O5	332.392	AFC000884	OXFPYCSNYOFUCH-UHFFFAOYSA-N	C=C1CC23CC1(CCC2C45CCCC(C)(C4C3C(=O)O)C(=O)O5)O	InChI=1S/C19H24O5/c1-10-8-17-9-18(10,23)7-4-11(17)19-6-3-5-16(2,15(22)24-19)13(19)12(17)14(20)21/h11-13,23H,1,3-9H2,2H3,(H,20,21)	1.694	53.453	329	0.789	156	83.83	0.252	0
gibberellin A24	19427-32-8	C11861		443454	32906	FDB013672	LMPR0104170018	C20H26O5	346.418	AFC000753	QQRSSHFHXYSOMF-UHFFFAOYSA-N	C=C1CC23CC1CCC3C4(CCCC(C)(C4C2C(=O)O)C(=O)O)C=O	InChI=1S/C20H26O5/c1-11-8-20-9-12(11)4-5-13(20)19(10-21)7-3-6-18(2,17(24)25)15(19)14(20)16(22)23/h10,12-15H,1,3-9H2,2H3,(H,22,23)(H,24,25)	2.619	56.547	336	0.75	150	91.67	0.265	0
gibberellin A25				14464358	72601	FDB013673		C20H26O6	362.418	AFC001222	XOUJCIPAKFLTCI-UHFFFAOYSA-N	C=C1CC23CC1CCC2C4(CCCC(C)(C4C3C(=O)O)C(=O)O)C(=O)O	InChI=1S/C20H26O6/c1-10-8-19-9-11(10)4-5-12(19)20(17(25)26)7-3-6-18(2,16(23)24)14(20)13(19)15(21)22/h11-14H,1,3-9H2,2H3,(H,21,22)(H,23,24)(H,25,26)	2.572	57.349	349	0.75	156	111.9	0.309	0
gibberellin A29		C06096		14605548	28040	FDB013668	LMPR0104170036	C19H24O6	348.391	AFC001226	BKBYHSYZKIAJDA-UHFFFAOYSA-N	C=C1CC23CC1(CCC2C45CC(CC(C)(C4C3C(=O)O)C(=O)O5)O)O	InChI=1S/C19H24O6/c1-9-5-17-8-18(9,24)4-3-11(17)19-7-10(20)6-16(2,15(23)25-19)13(19)12(17)14(21)22/h10-13,20,24H,1,3-8H2,2H3,(H,21,22)	0.333	54.255	352	0.789	162	104.06	0.299	0
gibberellin A29-catabolite	76040-29-4	C11855		25200854	29592	FDB030869	LMPR0104170012	[C19H20O6]2-	344.359	AFC001304	CFYSKMXAQIWPNE-UHFFFAOYSA-L	C=C1CC23CC1(CCC3C4=CC(=O)CC(C)(C4C2C(=O)[O-])C(=O)[O-])O	InChI=1S/C19H22O6/c1-9-6-18-8-19(9,25)4-3-12(18)11-5-10(20)7-17(2,16(23)24)13(11)14(18)15(21)22/h5,12-14,25H,1,3-4,6-8H2,2H3,(H,21,22)(H,23,24)/p-2	-0.581	51.588	350	0.632	152	117.56	0.342	0
gibberellin A34	32630-92-5	C11868		5281987	73258	FDB013648	LMPR0104170025	C19H24O6	348.391	AFC000957	IGZIQAJJXGRAJF-UHFFFAOYSA-N	C=C1CC23CC1CCC2C45CC(C(C(C)(C4C3C(=O)O)C(=O)O5)O)O	InChI=1S/C19H24O6/c1-8-5-18-6-9(8)3-4-11(18)19-7-10(20)14(21)17(2,16(24)25-19)13(19)12(18)15(22)23/h9-14,20-21H,1,3-7H2,2H3,(H,22,23)	0.583	54.255	359	0.789	160	104.06	0.299	0
gibberellin A34-catabolite		C11869		25201142	29594	FDB030870	LMPR0104170026	[C19H20O6]2-	344.359	AFC001308	ZHUFJGRQVHLFRM-UHFFFAOYSA-L	C=C1CC23CC1CCC3C4=CC(=O)C(C(C)(C4C2C(=O)[O-])C(=O)[O-])O	InChI=1S/C19H22O6/c1-8-6-19-7-9(8)3-4-11(19)10-5-12(20)15(21)18(2,17(24)25)13(10)14(19)16(22)23/h5,9,11,13-15,21H,1,3-4,6-7H2,2H3,(H,22,23)(H,24,25)/p-2	-0.045	51.588	350	0.632	150	117.56	0.342	0
gibberellin A36	38076-57-2	C11862		443455	29595	FDB030871	LMPR0104170019	C20H26O6	362.418	AFC000754	JZBLVVPDEDCVQA-UHFFFAOYSA-N	C=C1CC23CC1CCC3C4(CCC(C(C)(C4C2C(=O)O)C(=O)O)O)C=O	InChI=1S/C20H26O6/c1-10-7-20-8-11(10)3-4-12(20)19(9-21)6-5-13(22)18(2,17(25)26)15(19)14(20)16(23)24/h9,11-15,22H,1,3-8H2,2H3,(H,23,24)(H,25,26)	1.517	57.349	351	0.75	156	111.9	0.309	0
gibberellin A38	36434-14-7		HMDB0036902	14833724		FDB015865		C20H26O6	362.418	AFC001229	GAQSCLQIDHHPEE-UHFFFAOYSA-N	C=C1CC23CC1(CCC3C45CCC(C(C)(C4C2C(=O)O)C(=O)OC5)O)O	InChI=1S/C20H26O6/c1-10-7-19-8-20(10,25)6-3-11(19)18-5-4-12(21)17(2,16(24)26-9-18)14(18)13(19)15(22)23/h11-14,21,25H,1,3-9H2,2H3,(H,22,23)	0.789	57.349	365	0.8	166	104.06	0.287	0
gibberellin A4	468-44-0	C11864		92109	32902	FDB013647	LMPR0104170021	C19H24O5	332.392	AFC000475	RSQSQJNRHICNNH-UHFFFAOYSA-N	C=C1CC23CC1CCC2C45CCC(C(C)(C4C3C(=O)O)C(=O)O5)O	InChI=1S/C19H24O5/c1-9-7-18-8-10(9)3-4-11(18)19-6-5-12(20)17(2,16(23)24-19)14(19)13(18)15(21)22/h10-14,20H,1,3-8H2,2H3,(H,21,22)	1.673	53.453	336	0.789	154	83.83	0.252	0
gibberellin A44		C12308	HMDB0036901	5460372	28211	FDB015864	LMPR0104170030	C20H26O5	346.418	AFC001056	KSBJAONOPKRVRR-UHFFFAOYSA-N	C=C1CC23CC1(CCC3C45CCCC(C)(C4C2C(=O)O)C(=O)OC5)O	InChI=1S/C20H26O5/c1-11-8-19-9-20(11,24)7-4-12(19)18-6-3-5-17(2,16(23)25-10-18)14(18)13(19)15(21)22/h12-14,24H,1,3-10H2,2H3,(H,21,22)	1.891	56.547	350	0.8	160	83.83	0.242	0
gibberellin A44 open lactone	88373-65-3	C06095		25243940	143955		LMPR0104170008	[C20H26O6]2-	362.418	AFC001325	AXEUUXHMKSPQAI-UHFFFAOYSA-L	C=C1CC23CC1(CCC3C4(CCCC(C)(C4C2C(=O)[O-])C(=O)[O-])CO)O	InChI=1S/C20H28O6/c1-11-8-19-9-20(11,26)7-4-12(19)18(10-21)6-3-5-17(2,16(24)25)14(18)13(19)15(22)23/h12-14,21,26H,1,3-10H2,2H3,(H,22,23)(H,24,25)/p-2	-0.074	57.349	351	0.8	158	120.72	0.333	0
gibberellin A51	56978-14-4	C11865	HMDB0035021	443458	29599	FDB013655	LMPR0104170022	C19H24O5	332.392	AFC000755	HHDWSDSMWJQURA-UHFFFAOYSA-N	C=C1CC23CC1CCC2C45CC(CC(C)(C4C3C(=O)O)C(=O)O5)O	InChI=1S/C19H24O5/c1-9-5-18-6-10(9)3-4-12(18)19-8-11(20)7-17(2,16(23)24-19)14(19)13(18)15(21)22/h10-14,20H,1,3-8H2,2H3,(H,21,22)	1.415	53.453	337	0.789	154	83.83	0.252	0
gibberellin A51-catabolite		C11854		25201559	29600	FDB030873	LMPR0104170011	[C19H20O5]2-	328.36	AFC001311	JBJGOHHQQSPYTO-UHFFFAOYSA-L	C=C1CC23CC1CCC3C4=CC(=O)CC(C)(C4C2C(=O)[O-])C(=O)[O-]	InChI=1S/C19H22O5/c1-9-6-19-7-10(9)3-4-13(19)12-5-11(20)8-18(2,17(23)24)14(12)15(19)16(21)22/h5,10,13-15H,1,3-4,6-8H2,2H3,(H,21,22)(H,23,24)/p-2	0.5	50.786	335	0.632	144	97.33	0.297	0
gibberellin A53	51576-08-0	C06094	HMDB0036895	440914	27433	FDB015855	LMPR0104170007	C20H28O5	348.434	AFC000727	CZEMYYICWZPENF-UHFFFAOYSA-N	C=C1CC23CC1(CCC3C4(C)CCCC(C)(C4C2C(=O)O)C(=O)O)O	InChI=1S/C20H28O5/c1-11-9-19-10-20(11,25)8-5-12(19)17(2)6-4-7-18(3,16(23)24)14(17)13(19)15(21)22/h12-14,25H,1,4-10H2,2-3H3,(H,21,22)(H,23,24)	2.372	57.88	338	0.8	154	94.83	0.272	0
gibberellin A8	7044-72-6	C03579		5280607	28861	FDB013650	LMPR0104170005	C19H24O7	364.39	AFC000901	WZRRJZYYGOOHRC-UHFFFAOYSA-N	C=C1CC23CC1(CCC2C45CC(C(C(C)(C4C3C(=O)O)C(=O)O5)O)O)O	InChI=1S/C19H24O7/c1-8-5-17-7-18(8,25)4-3-10(17)19-6-9(20)13(21)16(2,15(24)26-19)12(19)11(17)14(22)23/h9-13,20-21,25H,1,3-7H2,2H3,(H,22,23)	-0.499	55.057	374	0.789	168	124.29	0.341	0
gibberellin A8-catabolite	78791-79-4	C11870		443463	29604	FDB030874	LMPR0104170027	C19H22O7	362.375	AFC000756	NAOFYNMJUGRAFS-UHFFFAOYSA-N	C=C1CC23CC1(CCC3C4=CC(=O)C(C(C)(C4C2C(=O)O)C(=O)O)O)O	InChI=1S/C19H22O7/c1-8-6-18-7-19(8,26)4-3-10(18)9-5-11(20)14(21)17(2,16(24)25)12(9)13(18)15(22)23/h5,10,12-14,21,26H,1,3-4,6-7H2,2H3,(H,22,23)(H,24,25)	0.229	53.723	365	0.632	158	132.13	0.365	0
gibberellin A9	427-77-0	C11863		5281984	29605	FDB013653	LMPR0104170020	C19H24O4	316.392	AFC000956	MHVYWTXXZIFXDT-UHFFFAOYSA-N	C=C1CC23CC1CCC2C45CCCC(C)(C4C3C(=O)O)C(=O)O5	InChI=1S/C19H24O4/c1-10-8-18-9-11(10)4-5-12(18)19-7-3-6-17(2,16(22)23-19)14(19)13(18)15(20)21/h11-14H,1,3-9H2,2H3,(H,20,21)	2.775	52.651	314	0.789	148	63.6	0.201	0
gibberellin A97			HMDB0041496	25203277		FDB021466		[C20H26O6]2-	362.418	AFC001321	DBFXNHHIIKEXPP-UHFFFAOYSA-L	C=C1CC23CC1(CCC3C4(C)CC(CC(C)(C4C2C(=O)[O-])C(=O)[O-])O)O	InChI=1S/C20H28O6/c1-10-6-19-9-20(10,26)5-4-12(19)17(2)7-11(21)8-18(3,16(24)25)14(17)13(19)15(22)23/h11-14,21,26H,1,4-9H2,2-3H3,(H,22,23)(H,24,25)/p-2	-0.22	57.349	361	0.8	160	120.72	0.333	0
gibberellin A98	95784-14-8			101997919	133480	FDB021483		C20H26O6	362.418	AFC001515	MEKWLWHELUEYHS-UHFFFAOYSA-N	C=C1CC23CC1(CCC2C45CC(CC(C)(C4C3C(=O)O)C(=O)OC5)O)O	InChI=1S/C20H26O6/c1-10-5-18-8-20(10,25)4-3-12(18)19-7-11(21)6-17(2,16(24)26-9-19)14(19)13(18)15(22)23/h11-14,21,25H,1,3-9H2,2H3,(H,22,23)	0.654	57.349	373	0.8	166	104.06	0.287	0
ginkgolic acid	22910-60-7	C10794	HMDB0033897	5281858	5354	FDB012092	LMPK15040003	C22H34O3	346.504	AFC000953	YXHVCZZLWZYHSA-UHFFFAOYSA-N	CCCCCCC=CCCCCCCCC1=CC=CC(=C1C(=O)O)O	InChI=1S/C22H34O3/c1-2-3-4-5-6-7-8-9-10-11-12-13-14-16-19-17-15-18-20(23)21(19)22(24)25/h7-8,15,17-18,23H,2-6,9-14,16H2,1H3,(H,24,25)	6.794	63.797	723	0.591	108	57.53	0.166	2
glehlinoside C				10007781				C26H32O13	552.526	AFC001145	FRTMBNNIFRBDDL-UHFFFAOYSA-N	COC1=CC(=CC=C1OC(CO)C(C2=CC=C(C(=C2)OC)OC3C(C(C(C(CO)O3)O)O)O)O)C=CC(=O)O	InChI=1S/C26H32O13/c1-35-17-9-13(4-8-21(29)30)3-6-15(17)37-19(11-27)22(31)14-5-7-16(18(10-14)36-2)38-26-25(34)24(33)23(32)20(12-28)39-26/h3-10,19-20,22-28,31-34H,11-12H2,1-2H3,(H,29,30)	-2.618	77.523	1239	0.423	196	204.83	0.371	4
gluconic acid	526-95-4	C00257	HMDB0000625	10690	33198	FDB001980		C6H12O7	196.156	AFC000332	RGHNJXZEOKUKBD-UHFFFAOYSA-N	C(C(C(C(C(C(=O)O)O)O)O)O)O	InChI=1S/C6H12O7/c7-1-2(8)3(9)4(10)5(11)6(12)13/h2-5,7-11H,1H2,(H,12,13)	-2.731	24.176	127	0.833	56	138.45	0.706	1
gluconolactone	90-80-2	C00198	HMDB0000150	7027	16217	FDB001245		C6H10O6	178.14	AFC000271	PHOQVHQSTUBQQK-UHFFFAOYSA-N	C(C1C(C(C(C(=O)O1)O)O)O)O	InChI=1S/C6H10O6/c7-1-2-3(8)4(9)5(10)6(11)12-2/h2-5,7-10H,1H2	-2.122	22.04	108	0.833	58	107.22	0.602	0
glucosamine	3416-24-8	C00329	HMDB0001514	439213	47977	FDB022668		C6H13NO5	179.171	AFC000646	MSWZFWKMSRAUBD-UHFFFAOYSA-N	C(C1C(C(C(C(O)O1)N)O)O)O	InChI=1S/C6H13NO5/c7-3-5(10)4(9)2(1-8)12-6(3)11/h2-6,8-11H,1,7H2	-2.803	24.338	108	1	58	116.17	0.649	0
glucose	50-99-7	C00031	HMDB0000122	5793	4167	FDB012530		C6H12O6	180.156	AFC000214	WQZGKKKJIJFFOK-UHFFFAOYSA-N	C(C1C(C(C(C(O)O1)O)O)O)O	InChI=1S/C6H12O6/c7-1-2-3(8)4(9)5(10)6(11)12-2/h2-11H,1H2	-2.513	23.374	108	1	58	110.38	0.613	0
Glucovanillin								C14H18O8	314.288	AFC000861	LPRNQMUKVDHCFX-UHFFFAOYSA-N	COC1=CC(=CC=C1O[C@H]2[C@@H]([C@H]([C@@H]([C@@H](CO)O2)O)O)O)C=O	InChI=1S/C14H18O8/c1-20-9-4-7(5-15)2-3-8(9)21-14-13(19)12(18)11(17)10(6-16)22-14/h2-5,10-14,16-19H,6H2,1H3	-2.137	43.058	386	0.5	110	125.68	0.4	0
glutamate-1-semialdehyde	68462-55-5	C03741		129297	15757	FDB030890		C5H9NO3	131.13	AFC000549	MPUUQNGXJSEWTF-UHFFFAOYSA-N	C(CC(=O)O)C(C=O)N	InChI=1S/C5H9NO3/c6-4(3-7)1-2-5(8)9/h3-4H,1-2,6H2,(H,8,9)	-0.877	18.307	74	0.6	34	80.39	0.613	0
glutamic acid	56-86-0	C00025	HMDB0000148	33032	16015	FDB012535;FDB012536		C5H9NO4	147.129	AFC000413	WHUUTDBJXJRKMK-UHFFFAOYSA-N	C(CC(=O)O)C(C(=O)O)N	InChI=1S/C5H9NO4/c6-3(5(9)10)1-2-4(7)8/h3H,1-2,6H2,(H,7,8)(H,9,10)	-0.924	19.109	85	0.6	40	100.62	0.684	0
glutamine	56-85-9	C00064	HMDB0000641;HMDB0003423	5961	18050	FDB023171;FDB030965		C5H10N2O3	146.145	AFC001774	ZDXPYRJPNDTMRX-UHFFFAOYSA-N	C(CC(=O)N)C(C(=O)O)N	InChI=1S/C5H10N2O3/c6-3(5(9)10)1-2-4(7)8/h3H,1-2,6H2,(H2,7,8)(H,9,10)	-1.526	20.074	85	0.6	40	106.41	0.728	0
glutathione	70-18-8	C00051	HMDB0000125	124886	16856	FDB001498		C10H17N3O6S	307.325	AFC000544	RWSXRVCMGQZWBV-UHFFFAOYSA-N	C(CC(=O)NC(CS)C(=O)NCC(=O)O)C(C(=O)O)N	InChI=1S/C10H17N3O6S/c11-5(10(18)19)1-2-7(14)13-6(4-20)9(17)12-3-8(15)16/h5-6,20H,1-4,11H2,(H,12,17)(H,13,14)(H,15,16)(H,18,19)	-1.917	39.947	347	0.6	86	197.62	0.644	0
glutathione disulfide	27025-41-8	C00127	HMDB0003337	65359	17858	FDB023147		C20H32N6O12S2	612.634	AFC000435	YPZRWBKMTBYPTK-UHFFFAOYSA-N	C(CC(=O)NC(CSSCC(C(=O)NCC(=O)O)NC(=O)CCC(C(=O)O)N)C(=O)NCC(=O)O)C(C(=O)O)N	InChI=1S/C20H32N6O12S2/c21-9(19(35)36)1-3-13(27)25-11(17(33)23-5-15(29)30)7-39-40-8-12(18(34)24-6-16(31)32)26-14(28)4-2-10(22)20(37)38/h9-12H,1-8,21-22H2,(H,23,33)(H,24,34)(H,25,27)(H,26,28)(H,29,30)(H,31,32)(H,35,36)(H,37,38)	-3.675	78.561	1154	0.6	178	368.24	0.602	4
glycerol	56-81-5	C00116	HMDB0000131	753	17754	FDB000756		C3H8O3	92.0939	AFC000098	PEDCQBHIVMGVHV-UHFFFAOYSA-N	C(C(CO)O)O	InChI=1S/C3H8O3/c4-1-3(6)2-5/h3-6H,1-2H2	-1.408	13.02	29	1	20	60.69	0.659	0
glyceryl monostearate	123-94-4	D01947	HMDB0011131	24699	75555	FDB027910	LMGL01010003	C21H42O4	358.557	AFC000394	VBICKXHEKHSIBG-UHFFFAOYSA-N	CCCCCCCCCCCCCCCCCC(=O)OCC(CO)O	InChI=1S/C21H42O4/c1-2-3-4-5-6-7-8-9-10-11-12-13-14-15-16-17-21(24)25-19-20(23)18-22/h20,22-23H,2-19H2,1H3	6.481	68.173	802	0.952	98	66.76	0.186	2
glyceryl palmitate	542-44-9		HMDB0011564	14900	69081	FDB003076		C19H38O4	330.503	AFC001900	QHZLMUACJMDIAE-UHFFFAOYSA-N	CCCCCCCCCCCCCCCC(=O)OCC(CO)O	InChI=1S/C19H38O4/c1-2-3-4-5-6-7-8-9-10-11-12-13-14-15-19(22)23-17-18(21)16-20/h18,20-21H,2-17H2,1H3	5.569	61.986	668	0.947	90	66.76	0.202	2
glycocyamine	352-97-6	C00581	HMDB0000128	763	16344	FDB021898		C3H7N3O2	117.107	AFC001768	BPMFZUMJYQTVII-UHFFFAOYSA-N	C(C(=O)O)N=C(N)N	InChI=1S/C3H7N3O2/c4-3(5)6-1-2(7)8/h1H2,(H,7,8)(H4,4,5,6)	-1.112	14.852	56	0.333	30	101.7	0.869	0
guanine	73-40-5	C00242	HMDB0000132	135398634	16235	FDB004222		C5H5N5O	151.126	AFC001570	UYTPUPDQBNUYGX-UHFFFAOYSA-N	C1=NC2=C(C(=O)NC(=N2)N)N1	InChI=1S/C5H5N5O/c6-5-9-3-2(4(11)10-5)7-1-8-3/h1H,(H4,6,7,8,9,10,11)	-1.523	18.436	95	0	58	91.87	0.608	0
guanosine	118-00-3	C00387	HMDB0000133	135398635	16750	FDB003632		C10H13N5O5	283.241	AFC001571	NYHBQMYGNKIUIF-UHFFFAOYSA-N	C(C1C(C(C(N2C=NC3=C2N=C(N)NC3=O)O1)O)O)O	InChI=1S/C10H13N5O5/c11-10-13-7-4(8(19)14-10)12-2-15(7)9-6(18)5(17)3(1-16)20-9/h2-3,5-6,9,16-18H,1H2,(H3,11,13,14,19)	-2.961	35.778	305	0.5	110	153	0.54	0
guanosine 3'-diphosphate 5'-triphosphate	38918-96-6	C04494	HMDB0060480	135398629	16690			C10H18N5O20P5	683.141	AFC001567	KCPMACXZAITQAX-UHFFFAOYSA-N	C(C1C(C(C(N2C=NC3=C2N=C(N)NC3=O)O1)O)OP(=O)(O)OP(=O)(O)O)OP(=O)(O)OP(=O)(O)OP(=O)(O)O	InChI=1S/C10H18N5O20P5/c11-10-13-7-4(8(17)14-10)12-2-15(7)9-5(16)6(32-39(26,27)33-36(18,19)20)3(31-9)1-30-38(24,25)35-40(28,29)34-37(21,22)23/h2-3,5-6,9,16H,1H2,(H,24,25)(H,26,27)(H,28,29)(H2,18,19,20)(H2,21,22,23)(H3,11,13,14,17)	-7.013	69.292	993	0.5	220	434.7	0.637	4
guanosine diphosphate mannose	3123-67-9	C00096	HMDB0001163	135398627	15820	FDB012326		C16H25N5O16P2	605.342	AFC001565	MVMSCBBUIHUTGJ-UHFFFAOYSA-N	C(C1C(C(C(C(O1)OP(=O)(O)OP(=O)(O)OCC2C(C(C(N3C=NC4=C3N=C(N)NC4=O)O2)O)O)O)O)O)O	InChI=1S/C16H25N5O16P2/c17-16-19-12-6(13(28)20-16)18-3-21(12)14-10(26)8(24)5(34-14)2-33-38(29,30)37-39(31,32)36-15-11(27)9(25)7(23)4(1-22)35-15/h3-5,7-11,14-15,22-27H,1-2H2,(H,29,30)(H,31,32)(H3,17,19,20,28)	-6.329	70.422	1190	0.688	214	344.83	0.57	3
hederagenin	465-99-6			73299	69579	FDB030901		C30H48O4	472.701	AFC000457	PGOYMURMZNDHNS-UHFFFAOYSA-N	CC1(C)CCC2(CCC3(C)C(=CCC4C5(C)CCC(C(C)(CO)C5CCC43C)O)C2C1)C(=O)O	InChI=1S/C30H48O4/c1-25(2)13-15-30(24(33)34)16-14-28(5)19(20(30)17-25)7-8-22-26(3)11-10-23(32)27(4,18-31)21(26)9-12-29(22,28)6/h7,20-23,31-32H,8-18H2,1-6H3,(H,33,34)	5.331	88.014	696	0.9	208	77.76	0.165	1
heneicosane	629-94-7		HMDB0061782	12403	32931	FDB004728	LMFA11000572	C21H44	296.575	AFC000357	FNAZRRHPUDJQCJ-UHFFFAOYSA-N	CCCCCCCCCCCCCCCCCCCCC	InChI=1S/C21H44/c1-3-5-7-9-11-13-15-17-19-21-20-18-16-14-12-10-8-6-4-2/h3-21H2,1-2H3	9.952	66.299	600	1	78	0	0	2
hentriacontane	630-04-6	C08376	HMDB0030092	12410	5659	FDB001480	LMFA11000573	C31H64	436.841	AFC000358	IUJAMGNYPWYUPM-UHFFFAOYSA-N	CCCCCCCCCCCCCCCCCCCCCCCCCCCCCCC	InChI=1S/C31H64/c1-3-5-7-9-11-13-15-17-19-21-23-25-27-29-31-30-28-26-24-22-20-18-16-14-12-10-8-6-4-2/h3-31H2,1-2H3	14.514	97.235	1350	1	118	0	0	2
heptadecane	629-78-7	C01816	HMDB0059830	12398	16148	FDB004729	LMFA11000003	C17H36	240.468	AFC000355	NDJKXXJCMXVBJW-UHFFFAOYSA-N	CCCCCCCCCCCCCCCCC	InChI=1S/C17H36/c1-3-5-7-9-11-13-15-17-16-14-12-10-8-6-4-2/h3-17H2,1-2H3	8.127	53.925	384	1	62	0	0	2
heptadecanoic acid	506-12-7		HMDB0002259	10465	32365	FDB004676	LMFA01010017	C17H34O2	270.451	AFC000330	KEMQGTRYUADPNZ-UHFFFAOYSA-N	CCCCCCCCCCCCCCCCC(=O)O	InChI=1S/C17H34O2/c1-2-3-4-5-6-7-8-9-10-11-12-13-14-15-16-17(18)19/h2-16H2,1H3,(H,18,19)	6.824	54.195	467	0.941	72	37.3	0.138	2
heptanal	111-71-7	C14390	HMDB0031475	8130	34787	FDB008048	LMFA06000001	C7H14O	114.186	AFC000302	FXHGMKSSBGDXIY-UHFFFAOYSA-N	CCCCCCC=O	InChI=1S/C7H14O/c1-2-3-4-5-6-7-8/h7H,2-6H2,1H3	2.309	22.457	74	0.857	26	17.07	0.15	0
hesperetin 5-O-glucoside	69651-80-5		HMDB0037535	18625123	166612	FDB016617	LMPK12140377	C22H24O11	464.42	AFC001917	QSLBWGKNSBMTJL-UHFFFAOYSA-N	COC1=CC=C(C=C1O)C2CC(=O)C3=C(C=C(C=C3O2)O)OC4C(C(C(C(CO)O4)O)O)O	InChI=1S/C22H24O11/c1-30-13-3-2-9(4-11(13)25)14-7-12(26)18-15(31-14)5-10(24)6-16(18)32-22-21(29)20(28)19(27)17(8-23)33-22/h2-6,14,17,19-25,27-29H,7-8H2,1H3	-2.744	63.545	852	0.409	178	175.37	0.378	2
hexadecanal	629-80-1	C00517	HMDB0001551	984	17600	FDB003048	LMFA06000088	C16H32O	240.425	AFC000151	NIOYUNMRJMEDGI-UHFFFAOYSA-N	CCCCCCCCCCCCCCCC=O	InChI=1S/C16H32O/c1-2-3-4-5-6-7-8-9-10-11-12-13-14-15-16-17/h16H,2-15H2,1H3	6.415	50.299	384	0.938	62	17.07	0.071	2
hexadecane	544-76-3		HMDB0033792	11006	45296	FDB011952	LMFA11000577	C16H34	226.442	AFC000335	DCAYPVUWAIABOU-UHFFFAOYSA-N	CCCCCCCCCCCCCCCC	InChI=1S/C16H34/c1-3-5-7-9-11-13-15-16-14-12-10-8-6-4-2/h3-16H2,1-2H3	7.671	50.831	338	1	58	0	0	2
hexanal	66-25-1		HMDB0005994	6184	88528	FDB008068	LMFA06000109	C6H12O	100.159	AFC000249	JARKCYVAAOWBJS-UHFFFAOYSA-N	CCCCCC=O	InChI=1S/C6H12O/c1-2-3-4-5-6-7/h6H,2-5H2,1H3	1.853	19.364	54	0.833	22	17.07	0.171	0
hexyl acetate	142-92-7		HMDB0029980	8908	87510	FDB001267	LMFA07010184	C8H16O2	144.212	AFC000316	AOGQPLXWSUTHQB-UHFFFAOYSA-N	CCCCCCOC(=O)C	InChI=1S/C8H16O2/c1-3-4-5-6-7-10-8(2)9/h3-7H2,1-2H3	2.262	26.353	111	0.875	36	26.3	0.182	0
histamine	51-45-6	C00388	HMDB0000870	774	18295	FDB012596		C5H9N3	111.145	AFC001769	NTYJJOPFIAHURM-UHFFFAOYSA-N	C(CN)C1=CN=CN1	InChI=1S/C5H9N3/c6-2-1-5-3-7-4-8-5/h3-4H,1-2,6H2,(H,7,8)	-1.825	18.101	64	0.4	34	50.41	0.454	0
histidinal	23784-15-8	C01929	HMDB0012234	152657	27676	FDB028877		C6H9N3O	139.155	AFC000563	VYOIELONWKIZJS-UHFFFAOYSA-N	C(C(C=O)N)C1=CN=CN1	InChI=1S/C6H9N3O/c7-5(3-10)1-6-2-8-4-9-6/h2-5H,1,7H2,(H,8,9)	-2.079	20.663	95	0.333	44	67.48	0.485	0
histidine	71-00-1	C00135	HMDB0000177	6274	15971	FDB011856		C6H9N3O2	155.155	AFC000254	HNDVDQJCIGZPNO-UHFFFAOYSA-N	C(C1=CN=CN1)C(C(=O)O)N	InChI=1S/C6H9N3O2/c7-5(6(10)11)1-4-2-8-3-9-4/h2-3,5H,1,7H2,(H,8,9)(H,10,11)	-2.127	21.465	106	0.333	50	87.71	0.566	0
histidinol	501-28-0	C00860	HMDB0003431	776	16255	FDB023173		C6H11N3O	141.171	AFC000104	ZQISRDCJNBUVMM-UHFFFAOYSA-N	C(C(CO)N)C1=CN=CN1	InChI=1S/C6H11N3O/c7-5(3-10)1-6-2-8-4-9-6/h2,4-5,10H,1,3,7H2,(H,8,9)	-2.336	21.997	95	0.5	44	70.64	0.501	0
homoarginine	156-86-5	C01924	HMDB0000670	9085	27747	FDB001490		C7H16N4O2	188.228	AFC001868	QUOGESRFPZDMMT-UHFFFAOYSA-N	C(CCN=C(N)N)C[C@@H](C(=O)O)N	InChI=1S/C7H16N4O2/c8-5(6(12)13)3-1-2-4-11-7(9)10/h5H,1-4,8H2,(H,12,13)(H4,9,10,11)	-0.814	28.993	171	0.714	52	127.72	0.679	0
homocystine	462-10-2	C20788	HMDB0000575	10010	17485	FDB022123		C8H16N2O4S2	268.356	AFC001889	ZTVZLYBCZNMWCF-UHFFFAOYSA-N	C(CSSCCC(C(=O)O)N)C(C(=O)O)N	InChI=1S/C8H16N2O4S2/c9-5(7(11)12)1-3-15-16-4-2-6(10)8(13)14/h5-6H,1-4,9-10H2,(H,11,12)(H,13,14)	-0.751	35.957	262	0.75	66	177.24	0.661	0
homogentisate	451-13-8	C00544	HMDB0000130	780	44747	FDB030907		C8H8O4	168.147	AFC000106	IGMNYECMUMZDDF-UHFFFAOYSA-N	C1=C(C=C(CC(=O)O)C(=C1)O)O	InChI=1S/C8H8O4/c9-6-1-2-7(10)5(3-6)4-8(11)12/h1-3,9-10H,4H2,(H,11,12)	-0.123	22.622	112	0.125	56	77.76	0.463	0
hydroquinone glucuronide	35119-91-6			115166				C12H14O8	286.235	AFC000518	KCWGTTYNHQOGSJ-UHFFFAOYSA-N	C1=C(C=CC(=C1)OC2C(C(C(C(C(=O)O)O2)O)O)O)O	InChI=1S/C12H14O8/c13-5-1-3-6(4-2-5)19-12-9(16)7(14)8(15)10(20-12)11(17)18/h1-4,7-10,12-16H,(H,17,18)	-1.605	36.871	327	0.417	102	136.68	0.478	0
hydroxymethylbilane	73023-76-4	C01024	HMDB0001137	788	16645	FDB022446		C40H46N4O17	854.811	AFC000109	WDFJYRZCZIUBPR-UHFFFAOYSA-N	C(CC(=O)O)C1=CNC(=C1CC(=O)O)CC2=C(CCC(=O)O)C(=C(CC3=C(CCC(=O)O)C(=C(CC4=C(CCC(=O)O)C(=C(CO)N4)CC(=O)O)N3)CC(=O)O)N2)CC(=O)O	InChI=1S/C40H46N4O17/c45-17-32-25(12-40(60)61)21(4-8-36(52)53)29(44-32)15-31-24(11-39(58)59)20(3-7-35(50)51)28(43-31)14-30-23(10-38(56)57)19(2-6-34(48)49)27(42-30)13-26-22(9-37(54)55)18(16-41-26)1-5-33(46)47/h16,41-45H,1-15,17H2,(H,46,47)(H,48,49)(H,50,51)(H,52,53)(H,54,55)(H,56,57)(H,58,59)(H,60,61)	-3.229	119.106	2053	0.4	308	366.75	0.429	4
hydroxymethylpyrimidine	73-67-6	C01279		777	16892	FDB030912		C6H9N3O	139.155	AFC000105	VUTBELPREDJDDH-UHFFFAOYSA-N	CC1=NC(=C(C=N1)CO)N	InChI=1S/C6H9N3O/c1-4-8-2-5(3-10)6(7)9-4/h2,10H,3H2,1H3,(H2,7,8,9)	-0.907	20.663	84	0.333	46	70.97	0.51	0
hydroxyproline	51-35-4	C01157	HMDB0000725	5810	18095	FDB013511		C5H9NO3	131.13	AFC000215	PMMYEEVYMWASQN-UHFFFAOYSA-N	C1C(CNC1C(=O)O)O	InChI=1S/C5H9NO3/c7-3-1-4(5(8)9)6-2-3/h3-4,6-7H,1-2H2,(H,8,9)	-1.147	18.307	68	0.8	42	69.56	0.531	0
hydroxypyruvate	1113-60-6	C00168	HMDB0001352	964	30841	FDB030913		C3H4O4	104.062	AFC000145	HHDDCCUIIUWNGJ-UHFFFAOYSA-N	C(C(=O)C(=O)O)O	InChI=1S/C3H4O4/c4-1-2(5)3(6)7/h4H,1H2,(H,6,7)	-0.952	11.155	36	0.333	26	74.6	0.717	0
hypoxanthine	68-94-0	C00262	HMDB0000157	135398638	17368	FDB003949		C5H4N4O	136.112	AFC001572	FDGQSTZJBFJUBT-UHFFFAOYSA-N	C1=NC2=C(C(=O)N=CN2)N1	InChI=1S/C5H4N4O/c10-5-3-4(7-1-6-3)8-2-9-5/h1-2H,(H2,6,7,8,9,10)	-1.391	16.669	79	0	52	65.85	0.484	0
iminoaspartic acid	79067-61-1	C05840	HMDB0001131	796	50616	FDB022443	LMFA01170110	C4H5NO4	131.087	AFC000112	NMUOATVLLQEYHI-UHFFFAOYSA-N	C(C(=N)C(=O)O)C(=O)O	InChI=1S/C4H5NO4/c5-2(4(8)9)1-3(6)7/h5H,1H2,(H,6,7)(H,8,9)	-0.654	14.682	63	0.25	36	98.45	0.751	0
indole	120-72-9	C00463	HMDB0000738	798	16881	FDB012008		C8H7N	117.148	AFC000113	SIKJAQJRHWYJAI-UHFFFAOYSA-N	C1=CC2=C(C=C1)NC=C2	InChI=1S/C8H7N/c1-2-4-8-7(3-1)5-6-9-8/h1-6,9H	0.287	19.848	70	0	46	12.03	0.103	0
indole acetaldehyde	2591-98-2	C00637		800	18086	FDB013950		C10H9NO	159.185	AFC000114	WHOOUMGHGSPMGR-UHFFFAOYSA-N	C1=CC2=C(C=C1)NC=C2CC=O	InChI=1S/C10H9NO/c12-6-5-8-7-11-10-4-2-1-3-9(8)10/h1-4,6-7,11H,5H2	-0.066	25.503	134	0.1	60	29.1	0.183	0
indole-3-acetamide	879-37-8	C02693	HMDB0029739	397	16031	FDB000937		C10H10N2O	174.2	AFC000063	ZOAMBXDOGPRZLP-UHFFFAOYSA-N	C1=CC2=C(C=C1)NC=C2CC(=O)N	InChI=1S/C10H10N2O/c11-10(13)5-7-6-12-9-4-2-1-3-8(7)9/h1-4,6,12H,5H2,(H2,11,13)	-0.715	27.27	147	0.1	66	55.12	0.317	0
indole-3-acetate	87-51-4	C00954	HMDB0000197	802	16411	FDB030920		C10H9NO2	175.184	AFC000115	SEOVTRFCIGRIMH-UHFFFAOYSA-N	C1=CC2=C(C=C1)NC=C2CC(=O)O	InChI=1S/C10H9NO2/c12-10(13)5-7-6-11-9-4-2-1-3-8(7)9/h1-4,6,11H,5H2,(H,12,13)	-0.113	26.305	147	0.1	66	49.33	0.282	0
indole-3-acetonitrile	771-51-7	C02938	HMDB0006524	351795	17566	FDB001365		C10H8N2	156.184	AFC000633	DMCPFOBLJMLSNX-UHFFFAOYSA-N	C1=CC2=C(C=C1)NC=C2CC#N	InChI=1S/C10H8N2/c11-6-5-8-7-12-10-4-2-1-3-9(8)10/h1-4,7,12H,5H2	0.161	25.134	134	0.1	60	35.82	0.23	0
indole-3-acetyl-L-alanine	57105-39-2			644225	71672			C13H14N2O3	246.262	AFC000831	FBDCJLXTUCMFLF-UHFFFAOYSA-N	CC(C(=O)O)NC(=O)CC1=CNC2=C1C=CC=C2	InChI=1S/C13H14N2O3/c1-8(13(17)18)15-12(16)6-9-7-14-11-5-3-2-4-10(9)11/h2-5,7-8,14H,6H2,1H3,(H,15,16)(H,17,18)	-0.463	36.821	294	0.231	90	78.43	0.319	0
indole-3-acetyl-L-leucine				3945661	133521	FDB030928		C16H20N2O3	288.342	AFC000862	HCZNPUHZYPPINM-UHFFFAOYSA-N	CC(C)CC(C(=O)O)NC(=O)CC1=CNC2=C1C=CC=C2	InChI=1S/C16H20N2O3/c1-10(2)7-14(16(20)21)18-15(19)8-11-9-17-13-6-4-3-5-12(11)13/h3-6,9-10,14,17H,7-8H2,1-2H3,(H,18,19)(H,20,21)	0.769	46.102	378	0.375	104	78.43	0.272	0
Indole-3-carboxyaldehyde	487-89-8	C08493	HMDB0029737	10256	28238	FDB000934		C9H7NO	145.158	AFC001850	OLNJUISKUQQNIM-UHFFFAOYSA-N	C1=CC2=C(C=C1)NC=C2C=O	InChI=1S/C9H7NO/c11-6-7-5-10-9-4-2-1-3-8(7)9/h1-6,10H	-0.101	22.41	105	0	56	29.1	0.201	0
indole-3-carboxylic acid	771-50-6	C19837	HMDB0003320	69867	24809	FDB000935		C9H7NO2	161.158	AFC001856	KMAKOBLIOCQGJP-UHFFFAOYSA-N	C1=CC2=C(C=C1)NC=C2C(=O)O	InChI=1S/C9H7NO2/c11-9(12)7-5-10-8-4-2-1-3-6(7)8/h1-5,10H,(H,11,12)	-0.148	23.212	116	0	62	49.33	0.306	0
indole-3-pyruvic acid	392-12-1	C00331		803	29750	FDB030941		C11H9NO3	203.194	AFC000116	RSTKLPZEZYGQPY-UHFFFAOYSA-N	C1=CC2=C(C=C1)NC=C2CC(=O)C(=O)O	InChI=1S/C11H9NO3/c13-10(11(14)15)5-7-6-12-9-4-2-1-3-8(7)9/h1-4,6,12H,5H2,(H,14,15)	-0.377	28.867	195	0.091	76	66.4	0.327	0
inosine	58-63-9	C00294	HMDB0000195	135398641	17596	FDB011802		C10H12N4O5	268.226	AFC001574	UGQMRVRMYYASKQ-UHFFFAOYSA-N	C(C1C(C(C(N2C=NC3=C2N=CNC3=O)O1)O)O)O	InChI=1S/C10H12N4O5/c15-1-4-6(16)7(17)10(19-4)14-3-13-5-8(14)11-2-12-9(5)18/h2-4,6-7,10,15-17H,1H2,(H,11,12,18)	-2.83	34.012	288	0.5	104	126.98	0.474	0
inosine triphosphate	132-06-9	C00081	HMDB0000189	135398643	16039	FDB021902		C10H15N4O14P3	508.166	AFC001575	HAEJPQIATWHALX-UHFFFAOYSA-N	C(C1C(C(C(N2C=NC3=C2N=CNC3=O)O1)O)O)OP(=O)(O)OP(=O)(O)OP(=O)(O)O	InChI=1S/C10H15N4O14P3/c15-6-4(1-25-30(21,22)28-31(23,24)27-29(18,19)20)26-10(7(6)16)14-3-13-5-8(14)11-2-12-9(5)17/h2-4,6-7,10,15-16H,1H2,(H,21,22)(H,23,24)(H,11,12,17)(H2,18,19,20)	-5.261	54.12	768	0.5	170	296	0.583	3
inosinic acid	131-99-7	C00130	HMDB0000175	135398640	17202	FDB021901		C10H13N4O8P	348.206	AFC001573	GRSZFWQUAKGDAV-UHFFFAOYSA-N	C(C1C(C(C(N2C=NC3=C2N=CNC3=O)O1)O)O)OP(=O)(O)O	InChI=1S/C10H13N4O8P/c15-6-4(1-21-23(18,19)20)22-10(7(6)16)14-3-13-5-8(14)11-2-12-9(5)17/h2-4,6-7,10,15-16H,1H2,(H,11,12,17)(H2,18,19,20)	-3.641	40.714	419	0.5	126	183.32	0.527	1
isoamyl alcohol	123-51-3	C07328	HMDB0006007	31260	15837	FDB008131		C5H12O	88.1484	AFC000409	PHTQWCKDNZKARW-UHFFFAOYSA-N	CC(C)CCO	InChI=1S/C5H12O/c1-5(2)3-4-6/h5-6H,3-4H2,1-2H3	1.223	17.604	31	1	20	20.23	0.23	0
isoamyl butyrate			HMDB0040221	7795	87422	FDB019935	LMFA07010574	C9H18O2	158.238	AFC001829	PQLMXFQTAMDXIZ-UHFFFAOYSA-N	CCCC(=O)OCCC(C)C	InChI=1S/C9H18O2/c1-4-5-9(10)11-7-6-8(2)3/h8H,4-7H2,1-3H3	2.725	29.446	122	0.889	42	26.3	0.166	0
isobazzanene				14830703				C15H24	204.352	AFC001228	WUOZOSFJWTXTKG-UHFFFAOYSA-N	CC1=CCC(C)(CC1)C2=CCCC2(C)C	InChI=1S/C15H24/c1-12-7-10-15(4,11-8-12)13-6-5-9-14(13,2)3/h6-7H,5,8-11H2,1-4H3	4.654	42.403	175	0.733	82	0	0	1
isobutyl 2-methylbutyrate	2445-67-2			102820		FDB004839	LMFA07010568	C9H18O2	158.238	AFC000505	NWZQCEQAPBRMFX-UHFFFAOYSA-N	CCC(C)C(=O)OCC(C)C	InChI=1S/C9H18O2/c1-5-8(4)9(10)11-6-7(2)3/h7-8H,5-6H2,1-4H3	2.799	29.446	107	0.889	44	26.3	0.166	0
isobutyryl-CoA	15621-60-0	C00630	HMDB0001243	3036931	15479	FDB022508	LMFA07050331	C25H42N7O17P3S	837.626	AFC000851	AEWHYWSPVRZHCT-UHFFFAOYSA-N	CC(C)C(=O)SCCNC(=O)CCNC(=O)C(C(C)(C)COP(=O)(O)OP(=O)(O)OCC1C(C(C(N2C=NC3=C2N=CN=C3N)O1)O)OP(=O)(O)O)O	InChI=1S/C25H42N7O17P3S/c1-13(2)24(37)53-8-7-27-15(33)5-6-28-22(36)19(35)25(3,4)10-46-52(43,44)49-51(41,42)45-9-14-18(48-50(38,39)40)17(34)23(47-14)32-12-31-16-20(26)29-11-30-21(16)32/h11-14,17-19,23,34-35H,5-10H2,1-4H3,(H,27,33)(H,28,36)(H,41,42)(H,43,44)(H2,26,29,30)(H2,38,39,40)	-4.286	107.129	2383	0.68	274	415.08	0.496	4
isochorismic acid	22642-82-6	C00885		189062	17582	FDB030944		C10H10O6	226.183	AFC000611	NTGWPRCCOQCMGE-UHFFFAOYSA-N	C=C(C(=O)O)OC1C=CC=C(C1O)C(=O)O	InChI=1S/C10H10O6/c1-5(9(12)13)16-7-4-2-3-6(8(7)11)10(14)15/h2-4,7-8,11H,1H2,(H,12,13)(H,14,15)	-0.194	29.08	196	0.2	76	104.06	0.46	0
isofraxidin	486-21-5	C17480		5318565	81121	FDB000696		C11H10O5	222.195	AFC001001	HOEVRHHMDJKUMZ-UHFFFAOYSA-N	COC1=CC2=C(C(=C1O)OC)OC(=O)C=C2	InChI=1S/C11H10O5/c1-14-7-5-6-3-4-8(12)16-10(6)11(15-2)9(7)13/h3-5,13H,1-2H3	-0.423	30.038	189	0.182	82	64.99	0.293	0
isokarounidiol				10003399				C30H48O2	440.702	AFC001782	XFQPYAUNERUHMH-UHFFFAOYSA-N	CC1(C)C2C=CC3=C(CCC4(C)C5CC(C)(CCC5(C)CCC34C)CO)C2(C)CCC1O	InChI=1S/C30H48O2/c1-25(2)22-9-8-21-20(28(22,5)12-11-24(25)32)10-13-30(7)23-18-26(3,19-31)14-15-27(23,4)16-17-29(21,30)6/h8-9,22-24,31-32H,10-19H2,1-7H3	5.963	86.41	690	0.867	198	40.46	0.092	1
isolariciresinol								C20H24O6	360.402	AFC001700	OGFXBIXJCWAUCH-UHFFFAOYSA-N	COC1=CC(=CC=C1O)[C@H]2C3=C(C[C@@H](CO)[C@@H]2CO)C=C(C(=C3)O)OC	InChI=1S/C20H24O6/c1-25-18-6-11(3-4-16(18)23)20-14-8-17(24)19(26-2)7-12(14)5-13(9-21)15(20)10-22/h3-4,6-8,13,15,20-24H,5,9-10H2,1-2H3	-0.282	56.015	456	0.4	136	99.38	0.276	0
isolariciresinol 9'-beta-D-glucopyranoside	63358-12-3		HMDB0038927	180275		FDB018394		C26H34O11	522.543	AFC000604	VRDFUQQTQIRXIH-UHFFFAOYSA-N	COC1=CC(=CC=C1O)C2C3=C(CC(CO)C2C4(C(C(C(C(CO)O4)O)O)O)OC)C=C(C(=C3)O)OC	InChI=1S/C26H34O11/c1-34-18-7-12(4-5-16(18)29)21-15-9-17(30)19(35-2)8-13(15)6-14(10-27)22(21)26(36-3)25(33)24(32)23(31)20(11-28)37-26/h4-5,7-9,14,20-25,27-33H,6,10-11H2,1-3H3	-2.179	77.253	716	0.538	200	178.53	0.342	3
isoleucine	73-32-5	C16434		791	38264	FDB012397		C6H13NO2	131.173	AFC000110	AGPKZVBTJJNPAG-UHFFFAOYSA-N	CCC(C)C(C(=O)O)N	InChI=1S/C6H13NO2/c1-3-4(2)5(7)6(8)9/h4-5H,3,7H2,1-2H3,(H,8,9)	0.699	21.932	61	0.833	36	63.32	0.483	0
isoliquiritigenin	961-29-5	C08650	HMDB0037316	638278	310312	FDB016335	LMPK12120096	C15H12O4	256.254	AFC000814	DXDRHHKMWQZJHT-UHFFFAOYSA-N	C1=C(C=CC(=C1)O)C=CC(=O)C2=CC=C(C=C2O)O	InChI=1S/C15H12O4/c16-11-4-1-10(2-5-11)3-8-14(18)13-7-6-12(17)9-15(13)19/h1-9,16-17,19H	0.93	37.61	364	0	94	77.76	0.304	0
isomultiflorenol	24462-48-4	C19801	HMDB0036758	11876210	62262	FDB015698		C30H50O	426.719	AFC001171	MCSMMGJCXCBSKD-UHFFFAOYSA-N	CC1(C)CCC2(C)CCC3(C)C4=C(CCC3(C)C2C1)C5(C)CCC(C(C)(C)C5CC4)O	InChI=1S/C30H50O/c1-25(2)15-16-27(5)17-18-29(7)21-9-10-22-26(3,4)24(31)12-13-28(22,6)20(21)11-14-30(29,8)23(27)19-25/h22-24,31H,9-19H2,1-8H3	7.498	86.942	631	0.933	194	20.23	0.047	1
isonicotinamide	1453-82-3	C02421		15074	6031			C6H6N2O	122.125	AFC001844	VFQXVTODMYMSMJ-UHFFFAOYSA-N	C1=C(C=CN=C1)C(=O)N	InChI=1S/C6H6N2O/c7-6(9)5-1-3-8-4-2-5/h1-4H,(H2,7,9)	-0.657	17.563	69	0	40	55.45	0.454	0
isoorientin	4261-42-1	C01821		114776	17965	FDB012395	LMPK12110469	C21H20O11	448.378	AFC000515	ODBRNZZJSYPIDI-UHFFFAOYSA-N	C1=CC(=C(C=C1C2=CC(=O)C3=C(C(=C(C=C3O2)O)C4C(C(C(C(CO)O4)O)O)O)O)O)O	InChI=1S/C21H20O11/c22-6-14-17(27)19(29)20(30)21(32-14)16-11(26)5-13-15(18(16)28)10(25)4-12(31-13)7-1-2-8(23)9(24)3-7/h1-5,14,17,19-24,26-30H,6H2	-3.112	59.118	782	0.286	176	197.37	0.44	2
isopentenyl pyrophosphate	358-71-4	C00129	HMDB0001347	1195	16584	FDB030946	LMPR01010008	C5H12O7P2	246.092	AFC000194	NUHSROFQTUXZQQ-UHFFFAOYSA-N	C=C(C)CCOP(=O)(O)OP(=O)(O)O	InChI=1S/C5H12O7P2/c1-5(2)3-4-11-14(9,10)12-13(6,7)8/h1,3-4H2,2H3,(H,9,10)(H2,6,7,8)	-0.594	29.676	163	0.6	64	132.91	0.54	0
isopropyl disulfide	4253-89-8		HMDB0029578	77932		FDB000734		C6H14S2	150.308	AFC000462	LZAZXBXPKRULLB-UHFFFAOYSA-N	CC(C)SSC(C)C	InChI=1S/C6H14S2/c1-5(2)7-8-6(3)4/h5-6H,1-4H3	2.838	25.695	56	1	30	50.6	0.337	0
isoquercitrin	482-35-9	C05623	HMDB0037362	5280804	68352	FDB016389	LMPK12112086	C21H20O12	464.377	AFC000914	OVSQVDMCBVZWGM-UHFFFAOYSA-N	C1=CC(=C(C=C1C2=C(C(=O)C3=C(C=C(C=C3O)O)O2)OC4C(C(C(C(CO)O4)O)O)O)O)O	InChI=1S/C21H20O12/c22-6-13-15(27)17(29)18(30)21(32-13)33-20-16(28)14-11(26)4-8(23)5-12(14)31-19(20)7-1-2-9(24)10(25)3-7/h1-5,13,15,17-18,21-27,29-30H,6H2	-3.335	59.92	666	0.286	180	206.6	0.445	2
isoquinoline	119-65-3	C06323	HMDB0034244	8405	16092	FDB012557		C9H7N	129.159	AFC001847	AWJUIBRHMBBTKR-UHFFFAOYSA-N	C1=CC2=C(C=C1)C=NC=C2	InChI=1S/C9H7N/c1-2-4-9-7-10-6-5-8(9)3-1/h1-7H	0.925	21.608	90	0	50	12.36	0.096	0
isorhamnetin	480-19-3	C10084	HMDB0002655	5281654	6052	FDB000604	LMPK12110002	C16H12O7	316.263	AFC000950	IZQSVPBOUDKVDZ-UHFFFAOYSA-N	COC1=C(C=CC(=C1)C2=C(C(=O)C3=C(C=C(C=C3O)O)O2)O)O	InChI=1S/C16H12O7/c1-22-11-4-7(2-3-9(11)18)16-15(21)14(20)13-10(19)5-8(17)6-12(13)23-16/h2-6,17-19,21H,1H3	-1.179	41.776	387	0.063	124	116.45	0.368	0
isorhoifolin	552-57-8		HMDB0037349	5377847		FDB004204		C27H30O14	578.52	AFC001929	FKIYLTVJPDLUDL-UHFFFAOYSA-N	C[C@H]1[C@@H]([C@H]([C@H]([C@H](OC[C@@H]2[C@H]([C@@H]([C@H]([C@H](OC3=CC4=C(C(=C3)O)C(=O)C=C(C5=CC=C(C=C5)O)O4)O2)O)O)O)O1)O)O)O	InChI=1S/C27H30O14/c1-10-20(31)22(33)24(35)26(38-10)37-9-18-21(32)23(34)25(36)27(41-18)39-13-6-14(29)19-15(30)8-16(40-17(19)7-13)11-2-4-12(28)5-3-11/h2-8,10,18,20-29,31-36H,9H2,1H3	-3.067	78.752	1353	0.444	224	225.06	0.389	3
isoscoparin		C05990		442611	18200		LMPK12110738	C22H22O11	462.404	AFC001806	KOMUHHCFAXYRPO-UHFFFAOYSA-N	COC1=C(C=CC(=C1)C2=CC(=O)C3=C(C(=C(C=C3O2)O)[C@H]4[C@@H]([C@H]([C@@H]([C@@H](CO)O4)O)O)O)O)O	InChI=1S/C22H22O11/c1-31-13-4-8(2-3-9(13)24)12-5-10(25)16-14(32-12)6-11(26)17(19(16)28)22-21(30)20(29)18(27)15(7-23)33-22/h2-6,15,18,20-24,26-30H,7H2,1H3	-3.047	62.211	811	0.318	180	186.37	0.403	2
isovaleryl-CoA	6244-91-3	C02939	HMDB0001113	165435	15487	FDB022430	LMFA07050336	C26H44N7O17P3S	851.653	AFC000592	UYVZIWWBJMYRCD-UHFFFAOYSA-N	CC(C)CC(=O)SCCNC(=O)CCNC(=O)C(C(C)(C)COP(=O)(O)OP(=O)(O)OCC1C(C(C(N2C=NC3=C2N=CN=C3N)O1)O)OP(=O)(O)O)O	InChI=1S/C26H44N7O17P3S/c1-14(2)9-17(35)54-8-7-28-16(34)5-6-29-24(38)21(37)26(3,4)11-47-53(44,45)50-52(42,43)46-10-15-20(49-51(39,40)41)19(36)25(48-15)33-13-32-18-22(27)30-12-31-23(18)33/h12-15,19-21,25,36-37H,5-11H2,1-4H3,(H,28,34)(H,29,38)(H,42,43)(H,44,45)(H2,27,30,31)(H2,39,40,41)	-4.041	110.223	2511	0.692	278	415.08	0.488	4
isovitexin	38953-85-4	C01714		162350	18330	FDB000614	LMPK12110338	C21H20O10	432.378	AFC000585	MYXNWGACZJSMBT-UHFFFAOYSA-N	C1=CC(=CC=C1C2=CC(=O)C3=C(C(=C(C=C3O2)O)C4C(C(C(C(CO)O4)O)O)O)O)O	InChI=1S/C21H20O10/c22-7-14-17(26)19(28)20(29)21(31-14)16-11(25)6-13-15(18(16)27)10(24)5-12(30-13)8-1-3-9(23)4-2-8/h1-6,14,17,19-23,25-29H,7H2	-2.549	58.316	755	0.286	170	177.14	0.41	1
isovitexin 2''-O-glucoside	60767-80-8	C04199		185995	75432	FDB000615	LMPK12110217	C27H30O15	594.519	AFC000607	RQTTXGQDIROLTQ-UHFFFAOYSA-N	C1=CC(=CC=C1C2=CC(=O)C3=C(C(=C(C=C3O2)O)C4C(C(C(C(CO)O4)O)O)OC5C(C(C(C(CO)O5)O)O)O)O)O	InChI=1S/C27H30O15/c28-7-15-20(34)23(37)26(42-27-24(38)22(36)19(33)16(8-29)41-27)25(40-15)18-12(32)6-14-17(21(18)35)11(31)5-13(39-14)9-1-3-10(30)4-2-9/h1-6,15-16,19-20,22-30,32-38H,7-8H2	-4.296	79.554	1232	0.444	230	256.29	0.431	3
jasmonic acid-isoleucine conjugate	120330-93-0		HMDB0029391	5497150	81897	FDB000472		C18H29NO4	323.428	AFC001833	BDUIIOHQSYPXRT-UHFFFAOYSA-N	CC/C=C\C[C@@H]1[C@H](CCC1=O)CC(=O)N[C@@H](CC(C)C)C(=O)O	InChI=1S/C18H29NO4/c1-4-5-6-7-14-13(8-9-16(14)20)11-17(21)19-15(18(22)23)10-12(2)3/h5-6,12-15H,4,7-11H2,1-3H3,(H,19,21)(H,22,23)	2.848	55.325	449	0.722	106	83.47	0.258	0
kaempferol	520-18-3	C05903	HMDB0005801	5280863	28499	FDB000633	LMPK12110003	C15H10O6	286.237	AFC000918	IYRMWMYZSQPJKC-UHFFFAOYSA-N	C1=CC(=CC=C1C2=C(C(=O)C3=C(C=C(C=C3O)O)O2)O)O	InChI=1S/C15H10O6/c16-8-3-1-7(2-4-8)15-14(20)13(19)12-10(18)5-9(17)6-11(12)21-15/h1-6,16-18,20H	-0.681	37.88	351	0	114	107.22	0.375	0
Kaempferol 3-O-beta-D-galactopyranosyl-7-O-alpha-L-rhamnopyranoside	38784-79-1		HMDB0037426	57390614	68881		LMPK12111672	C27H30O15	594.519	AFC001703	JYXSWDCPHRTYGU-UHFFFAOYSA-N	C[C@H]1[C@@H]([C@H]([C@H]([C@@H](O1)OC2=CC3=C(C(=C2)O)C(=O)C(=C(C4=CC=C(C=C4)O)O3)O[C@H]5[C@@H]([C@H]([C@H]([C@@H](CO)O5)O)O)O)O)O)O	InChI=1S/C27H30O15/c1-9-17(31)20(34)22(36)26(38-9)39-12-6-13(30)16-14(7-12)40-24(10-2-4-11(29)5-3-10)25(19(16)33)42-27-23(37)21(35)18(32)15(8-28)41-27/h2-7,9,15,17-18,20-23,26-32,34-37H,8H2,1H3	-3.974	79.554	1179	0.444	230	245.29	0.413	3
Kaempferol 3-O-beta-D-glucopyranosyl-7-O-alpha-L-rhamnopyranoside								C27H30O15	594.519	AFC001703	JYXSWDCPHRTYGU-UHFFFAOYSA-N	C[C@H]1[C@@H]([C@H]([C@H]([C@@H](O1)OC2=CC3=C(C(=C2)O)C(=O)C(=C(C4=CC=C(C=C4)O)O3)O[C@H]5[C@@H]([C@H]([C@@H]([C@@H](CO)O5)O)O)O)O)O)O	InChI=1S/C27H30O15/c1-9-17(31)20(34)22(36)26(38-9)39-12-6-13(30)16-14(7-12)40-24(10-2-4-11(29)5-3-10)25(19(16)33)42-27-23(37)21(35)18(32)15(8-28)41-27/h2-7,9,15,17-18,20-23,26-32,34-37H,8H2,1H3	-3.974	79.554	1179	0.444	230	245.29	0.413	3
kaempferol-3-glucoside	480-10-4	C12249	HMDB0037429	5282102	30200	FDB016478		C21H20O11	448.378	AFC000959	JPUKWEQWGBDDQB-UHFFFAOYSA-N	C1=CC(=CC=C1C2=C(C(=O)C3=C(C=C(C=C3O)O)O2)OC4C(C(C(C(CO)O4)O)O)O)O	InChI=1S/C21H20O11/c22-7-13-15(26)17(28)18(29)21(31-13)32-20-16(27)14-11(25)5-10(24)6-12(14)30-19(20)8-1-3-9(23)4-2-8/h1-6,13,15,17-18,21-26,28-29H,7H2	-2.771	59.118	645	0.286	174	186.37	0.416	2
karounidiol	118117-31-0	C17394		159490	81057			C30H48O2	440.702	AFC001780	UIXJVDGAGQPTFR-UHFFFAOYSA-N	CC1(C)C2CC=C3C(=CCC4(C)C5CC(C)(CCC5(C)CCC34C)CO)C2(C)CCC1O	InChI=1S/C30H48O2/c1-25(2)22-9-8-21-20(28(22,5)12-11-24(25)32)10-13-30(7)23-18-26(3,19-31)14-15-27(23,4)16-17-29(21,30)6/h8,10,22-24,31-32H,9,11-19H2,1-7H3	5.963	86.41	690	0.867	198	40.46	0.092	1
karounidiol 3-benzoate				21596186				C37H52O3	544.808	AFC001784	QTSNHJFHQLIOGA-UHFFFAOYSA-N	CC1(C)C2CC=C3C(=CCC4(C)C5CC(C)(CCC5(C)CCC34C)CO)C2(C)CCC1OC(=O)C6=CC=CC=C6	InChI=1S/C37H52O3/c1-32(2)28-14-13-27-26(35(28,5)17-16-30(32)40-31(39)25-11-9-8-10-12-25)15-18-37(7)29-23-33(3,24-38)19-20-34(29,4)21-22-36(27,37)6/h8-13,15,28-30,38H,14,16-24H2,1-7H3	7.54	102.199	1193	0.703	240	46.53	0.085	2
kauralexin A1				90657333				[C20H31O2]-	303.46	AFC001483	KNCGYSOHQZGPKT-UHFFFAOYSA-M	CC1(C)CCCC2(C)C1CCC34CC(CCC23)C(C4)C(=O)[O-]	InChI=1S/C20H32O2/c1-18(2)8-4-9-19(3)15(18)7-10-20-11-13(5-6-16(19)20)14(12-20)17(21)22/h13-16H,4-12H2,1-3H3,(H,21,22)/p-1	4.058	57.475	337	0.95	134	40.13	0.132	1
kauralexin A2				75826609				[C20H28O4]2-	332.435	AFC001473	HITLMPHPGUZLGI-UHFFFAOYSA-L	CC12CCCC(C)(C2CCC34CC(CCC13)C(C4)C(=O)[O-])C(=O)[O-]	InChI=1S/C20H30O4/c1-18-7-3-8-19(2,17(23)24)14(18)6-9-20-10-12(4-5-15(18)20)13(11-20)16(21)22/h12-15H,3-11H2,1-2H3,(H,21,22)(H,23,24)/p-2	2.499	57.078	398	0.9	144	80.26	0.242	0
kauralexin A3				90657502				[C20H29O3]-	317.443	AFC001485	KVKFKHMIIMGSRS-UHFFFAOYSA-M	CC1(CCCC2(C)C1CCC34CC(CCC23)C(C4)C(=O)[O-])C=O	InChI=1S/C20H30O3/c1-18(12-21)7-3-8-19(2)15(18)6-9-20-10-13(4-5-16(19)20)14(11-20)17(22)23/h12-16H,3-11H2,1-2H3,(H,22,23)/p-1	3.224	56.943	379	0.9	138	57.2	0.18	1
kauralexin B1				90658967				[C20H29O2]-	301.444	AFC001499	DULGJEIWRQIEDP-UHFFFAOYSA-M	CC1(C)CCCC2(C)C1CCC34CC(CCC23)C(=C4)C(=O)[O-]	InChI=1S/C20H30O2/c1-18(2)8-4-9-19(3)15(18)7-10-20-11-13(5-6-16(19)20)14(12-20)17(21)22/h12-13,15-16H,4-11H2,1-3H3,(H,21,22)/p-1	4.019	56.141	337	0.85	134	40.13	0.133	1
kauralexin B2				90657689				[C20H26O4]2-	330.419	AFC001487	YQNLDLVKFNZFTI-UHFFFAOYSA-L	CC12CCCC(C)(C2CCC34CC(CCC13)C(=C4)C(=O)[O-])C(=O)[O-]	InChI=1S/C20H28O4/c1-18-7-3-8-19(2,17(23)24)14(18)6-9-20-10-12(4-5-15(18)20)13(11-20)16(21)22/h11-12,14-15H,3-10H2,1-2H3,(H,21,22)(H,23,24)/p-2	2.459	55.745	398	0.8	144	80.26	0.243	0
kauralexin B3				90658844				[C20H27O3]-	315.427	AFC001496	MNWRXDQYFZSZMN-UHFFFAOYSA-M	CC1(CCCC2(C)C1CCC34CC(CCC23)C(=C4)C(=O)[O-])C=O	InChI=1S/C20H28O3/c1-18(12-21)7-3-8-19(2)15(18)6-9-20-10-13(4-5-16(19)20)14(11-20)17(22)23/h11-13,15-16H,3-10H2,1-2H3,(H,22,23)/p-1	3.184	55.609	379	0.8	138	57.2	0.181	0
KDO2-(palmitoleoyl)-lipid IVA		C20933		25246183	61520			[C100H176N2O38P2]6-	2076.41	AFC001363	GUGOELZTMNFFOJ-UHFFFAOYSA-H	CCCCCCC=CCCCCCCCC(=O)OC(CCCCCCCCCCC)CC(=O)NC1C(C(C(COC2(CC(C(C(C(CO)O)O2)O)OC3(CC(C(C(C(CO)O)O3)O)O)C(=O)[O-])C(=O)[O-])OC1OCC4C(C(C(C(O4)OP(=O)([O-])[O-])NC(=O)CC(CCCCCCCCCCC)O)OC(=O)CC(CCCCCCCCCCC)O)O)OP(=O)([O-])[O-])OC(=O)CC(CCCCCCCCCCC)O	InChI=1S/C100H182N2O38P2/c1-6-11-16-21-26-31-32-33-34-39-44-49-54-59-82(113)131-73(58-53-48-43-38-30-25-20-15-10-5)63-81(112)102-86-94(135-84(115)62-72(107)57-52-47-42-37-29-24-19-14-9-4)92(139-141(123,124)125)79(69-130-99(97(119)120)65-77(88(117)91(137-99)76(110)67-104)136-100(98(121)122)64-74(108)87(116)90(138-100)75(109)66-103)133-95(86)129-68-78-89(118)93(134-83(114)61-71(106)56-51-46-41-36-2…	12.828	333.292	8953	0.91	668	668.96	0.322	5
Kdo2-lipid A		C06026		5771770	27963		LMSL02000001	C110H202N2O39P2	2238.72	AFC001079	DIXUKJUHGLIZGU-UHFFFAOYSA-N	CCCCCCCCCCCCCC(=O)OC(CCCCCCCCCCC)CC(=O)OC1C(C(OCC2C(C(C(C(O2)OP(=O)(O)O)NC(=O)CC(CCCCCCCCCCC)O)OC(=O)CC(CCCCCCCCCCC)O)O)OC(COC3(CC(C(C(C(CO)O)O3)O)OC4(CC(C(C(C(CO)O)O4)O)O)C(=O)O)C(=O)O)C1OP(=O)(O)O)NC(=O)CC(CCCCCCCCCCC)OC(=O)CCCCCCCCCCC	InChI=1S/C110H202N2O39P2/c1-7-13-19-25-31-37-38-44-50-56-62-68-92(123)142-82(66-60-54-48-42-35-29-23-17-11-5)72-94(125)146-104-96(112-90(121)71-81(65-59-53-47-41-34-28-22-16-10-4)141-91(122)67-61-55-49-43-36-30-24-18-12-6)105(144-88(102(104)150-152(133,134)135)78-140-109(107(129)130)74-86(98(127)101(148-109)85(119)76-114)147-110(108(131)132)73-83(117)97(126)100(149-110)84(118)75-113)139-77-87-99(…	20.203	369.03	9492	0.927	714	658.05	0.294	5
KDO2-lipid A, cold adapted		C21991		25246139	61522			[C114H202N2O39P2]6-	2286.77	AFC001362	YMYMIWUIGJUAIZ-UHFFFAOYSA-H	CCCCCCC=CCCCCCCCC(=O)OC(CCCCCCCCCCC)CC(=O)NC1C(C(C(COC2(CC(C(C(C(CO)O)O2)O)OC3(CC(C(C(C(CO)O)O3)O)O)C(=O)[O-])C(=O)[O-])OC1OCC4C(C(C(C(O4)OP(=O)([O-])[O-])NC(=O)CC(CCCCCCCCCCC)O)OC(=O)CC(CCCCCCCCCCC)O)O)OP(=O)([O-])[O-])OC(=O)CC(CCCCCCCCCCC)OC(=O)CCCCCCCCCCCCC	InChI=1S/C114H208N2O39P2/c1-7-13-19-25-31-37-39-40-42-48-54-59-65-71-95(126)145-85(69-63-57-51-45-35-29-23-17-11-5)75-94(125)116-100-108(150-98(129)76-86(70-64-58-52-46-36-30-24-18-12-6)146-96(127)72-66-60-53-47-41-38-32-26-20-14-8-2)106(154-156(137,138)139)92(82-144-113(111(133)134)78-90(102(131)105(152-113)89(123)80-118)151-114(112(135)136)77-87(121)101(130)104(153-114)88(122)79-117)148-109(100…	18.893	376.07	9992	0.912	730	675.03	0.295	5
[truncated: 498 more rows]
