# Supplementary material for: A Catalog of Natural Products Occurring in Watermelon—Citrullus lanatus
Source: Front Nutr. 2021 Sep 14;8:729822. doi: 10.3389/fnut.2021.729822 (PMC8476801; doi:10.3389/fnut.2021.729822)
Supplement: Supplementary file 2 [file Table_2.XLSX]

## Sheet: Sheet1
Supplemental table 2. Natural products reported in watermelon - Citrullus lanatus
Compound	Alternate names	AFC_ID	AFC link to cheminfo data	PubChem	Plant part	Amount_low	Amount_high	Plus_minus	units	Comment	Reference
(-)-(4S)-limonene		AFC000653	AFC000385	439250	U						33
(-)-alpha-cuprenene		AFC001196	AFC001196	5316205	U						33
(-)-alpha-pinene	pinene	AFC000731	AFC000731	440968	S	NR	NR	NR	NR		35
(-)-alpha-pinene	pinene	AFC000731	AFC000731	440968	U						33
(-)-alpha-terpineol		AFC000742	AFC000742	443162	U						33
(-)-beta-caryophyllene		AFC001010	AFC001010	5281515	U						33
(-)-beta-pinene		AFC000730	AFC000730	440967	U						33
(-)-cuparene		AFC001159	AFC001159	11084908	U						33
(-)-jasmonate		AFC000926	AFC000926	5281166	G	NR	NR	NR	NR	see reference for details on strains Calhoun Grey, Charleston Gray, PI-296341 and Sugar Baby	125
(-)-jasmonate		AFC000926	AFC000926	5281166	U						33
(-)-jasmonic acid methyl ester	methyl jasmonate	AFC001033	AFC001033	5281929	G	NR	NR	NR	NR	see reference for details on strains Calhoun Grey, Charleston Gray, PI-296341 and Sugar Baby	125
(-)-jasmonic acid methyl ester	methyl jasmonate	AFC001033	AFC001033	5281929	U						33
(-)-lactol		AFC001604	AFC001604	no entry found	U						33
(-)-lariciresinol		AFC001291	AFC000631	23815394	U						33
(-)-matairesinol		AFC000519	AFC000519	119205	U						33
(-)-matairesinol		AFC000519	AFC000519	119205	U						3
(-)-pinoresinol		AFC001197	AFC000459	12309636	U						33
(-)-secoisolariciresinol		AFC000436	AFC000436	65373	U						33
(-)-secoisolariciresinol		AFC000436	AFC000436	65373	U						3
(-)-sophorol		AFC001285	AFC001285	23724668	U						33
(-)-ureidoglycolate	S-(-)-ureidoglycolate	AFC001278	AFC001278	23615273	U						33
(+)-7-epi-jasmonoyl-CoA	jasmonoyl-CoA;(+)-7-iso-jasmonoyl-CoA	AFC001527	AFC001527	126961028	U						33
(+)-7-iso-jasmonate		AFC001125	AFC001125	7251182	U						33
(+)-alpha-barbatene		AFC001216	AFC001216	14037349	U						33
(+)-aviprin I	oxypeucedanin hydrate	AFC000374	AFC000374	17536	F	NR	NR	NR	NR		166
(+)-aviprin II		AFC001605	AFC001605	no entry found	F	NR	NR	NR	NR		166
(+)-beta-barbatene		AFC001219	AFC001219	14109421	U						33
(+)-beta-chamigrene		AFC001195	AFC001195	12302844	U						33
(+)-lariciresinol		AFC000631	AFC000631	332427	U						33
(+)-lariciresinol		AFC000631	AFC000631	332427	U						3
(+)-pinoresinol		AFC000459	AFC000459	73399	U						33
(+)-pinoresinol		AFC000459	AFC000459	73399	U						3
(+)-secoisolariciresinol		AFC001084	AFC000436	6336781	U						33
(+)-taxifolin(1-)	trans dihydroquercetin	AFC001342	AFC001342	25244891	U						33
(+)-thujopsene		AFC001163	AFC001163	11401461	U						33
(1R,2R,3aS,3bS,9aR,9bR,11aR)-2-hydroxy-3a,6,6,9b,11a-pentamethyl-8-{[(2S,3R,4S,5S,6R)-3,4,5-trihydroxy-6-(hydroxymethyl)oxan-2-yl]oxy}-1-[(2R,3R,4E)-2,3,6-trihydroxy-6-methylhept-4-en-2-yl]-1H,2H,3H,3bH,4H,9aH,11H-cyclopenta[a]phenanthrene-7,10-dione	MNDSHGJSXPOSMP-UHFFFAOYSA-N	AFC001805	AFC001805	no entry found	U						3
(1R,2R,3aS,3bS,9aR,9bR,11aR)-2-hydroxy-3a,6,6,9b,11a-pentamethyl-8-{[(2S,3R,4S,5S,6R)-3,4,5-trihydroxy-6-(hydroxymethyl)oxan-2-yl]oxy}-1-[(2R,5R)-2,5,6-trihydroxy-6-methyl-3-oxoheptan-2-yl]-1H,2H,3H,3bH,4H,9aH,11H-cyclopenta[a]phenanthrene-7,10-dione	XPEAYHKXEWXAKV-UHFFFAOYSA-N	AFC001803	AFC001803	no entry found	U						3
(1R,2R,3aS,3bS,9aR,9bR,11aR)-2-hydroxy-3a,6,6,9b,11a-pentamethyl-8-{[(2S,3R,4S,5S,6R)-3,4,5-trihydroxy-6-(hydroxymethyl)oxan-2-yl]oxy}-1-[(2R,5S)-2,5,6-trihydroxy-6-methyl-3-oxoheptan-2-yl]-1H,2H,3H,3bH,4H,9aH,11H-cyclopenta[a]phenanthrene-7,10-dione	XPEAYHKXEWXAKV-UHFFFAOYSA-N	AFC001825	AFC001803	no entry found	U						3
(1R,6R)-6-hydroxy-2-succinylcyclohexa-2,4-diene-1-carboxylate	(1R,6R)-2-(3-carboxylatopropanoyl)-6-hydroxycyclohexa-2,4-diene-1-carboxylate	AFC001360	AFC001360	25246102	U						33
(1S,2R)-1-C-(indol-3-yl)glycerol 3-phosphate		AFC001410	AFC001410	46878464	U						33
(1S,2S,4R,6S,8S,9R,10R,13R,14R)-16-{[(2S,3R,4S,5S,6R)-4,5-dihydroxy-6-(hydroxymethyl)-3-{[(2S,3R,4R,5R,6S)-3,4,5-trihydroxy-6-methyloxan-2-yl]oxy}oxan-2-yl]oxy}-8-hydroxy-2,8,10,13,18,18-hexamethyl-6-(2-methylprop-1-en-1-yl)-5-oxapentacyclo[11.8.0.0²,¹⁰.0⁴,⁹.0¹⁴,¹⁹]henicosa-15,19-diene-12,17-dione	UQKQSTXKJGBRSV-UHFFFAOYSA-N	AFC001816	AFC001816	no entry found	U						3
(1S,2S,4R,6S,8S,9R,10R,13R,14R)-16-{[(2S,3R,4S,5S,6R)-4,5-dihydroxy-6-(hydroxymethyl)-3-{[(2S,3R,4R,5R,6S)-3,4,5-trihydroxy-6-methyloxan-2-yl]oxy}oxan-2-yl]oxy}-8-hydroxy-6-[(1E)-3-hydroxy-2-methylprop-1-en-1-yl]-2,8,10,13,18,18-hexamethyl-5-oxapentacyclo[11.8.0.0²,¹⁰.0⁴,⁹.0¹⁴,¹⁹]henicosa-15,19-diene-12,17-dione	BEQDSDZQSKPXIG-UHFFFAOYSA-N	AFC001802	AFC001802	no entry found	U						3
(1S,2S,4R,6S,9R,10R,11R,14R,15R)-9-hydroxy-2,9,11,14,19,19-hexamethyl-6-(prop-1-en-2-yl)-17-{[(2S,3R,4S,5S,6R)-3,4,5-trihydroxy-6-(hydroxymethyl)oxan-2-yl]oxy}-5-oxapentacyclo[12.8.0.0²,¹¹.0⁴,¹⁰.0¹⁵,²⁰]docosa-16,20-diene-8,13,18-trione	WXOQVIJCYNJZTP-UHFFFAOYSA-N	AFC001807	AFC001807	no entry found	U						3
(1S,2S,4R,6S,9R,10R,11R,14R,15R)-9-hydroxy-6-(2-methoxypropan-2-yl)-2,9,11,14,19,19-hexamethyl-17-{[(2S,3R,4S,5S,6R)-3,4,5-trihydroxy-6-(hydroxymethyl)oxan-2-yl]oxy}-5-oxapentacyclo[12.8.0.0²,¹¹.0⁴,¹⁰.0¹⁵,²⁰]docosa-16,20-diene-8,13,18-trione	IEGSGKOVOHXXNB-UHFFFAOYSA-N	AFC001823	AFC001823	no entry found	U						3
(1S,2S,4R,6S,9R,10R,11R,14R,15R)-9,17-dihydroxy-6-(2-methoxypropan-2-yl)-2,9,11,14,19,19-hexamethyl-5-oxapentacyclo[12.8.0.0²,¹¹.0⁴,¹⁰.0¹⁵,²⁰]docosa-16,20-diene-8,13,18-trione	KGYOQUPPUIDIOS-UHFFFAOYSA-N	AFC001826	AFC001826	no entry found	U						3
(1S,2S,4R,6S,9S,10R,11R,14R,15R)-6-(2-methoxypropan-2-yl)-2,9,11,14,19,19-hexamethyl-17-{[(2S,3R,4S,5S,6R)-3,4,5-trihydroxy-6-(hydroxymethyl)oxan-2-yl]oxy}-5-oxapentacyclo[12.8.0.0²,¹¹.0⁴,¹⁰.0¹⁵,²⁰]docosa-16,20-diene-8,13,18-trione	CJXFVEKXQMCNNX-UHFFFAOYSA-N	AFC001815	AFC001815	no entry found	U						3
(2E,6E)-farnesal		AFC000900	AFC000900	5280598	U						33
(2E,6E)-farnesol		AFC000769	AFC000769	445070	U						33
(2E,6E)-farnesyl diphosphate		AFC001239	AFC001239	15983959	U						33
(2E,6Z)-nona-2,6-dien-1-ol	trans, cis-2,6-nonadien-1-ol;2-trans-6-cis-nonadien-1-ol;violet alcohol;(E,Z)-2,6-nonadien-1-ol;nona-trans-2-cis-6-dien-1-ol;(E,Z)-2,6-nonadienol	AFC001020	AFC001020	5320191;5362833	F	9.7	9.7	NR	ng/g	C. vulgaris Schrad	163
(2E,6Z)-nona-2,6-dien-1-ol	trans, cis-2,6-nonadien-1-ol;2-trans-6-cis-nonadien-1-ol;violet alcohol;(E,Z)-2,6-nonadien-1-ol;nona-trans-2-cis-6-dien-1-ol;(E,Z)-2,6-nonadienol	AFC001020	AFC001020	5320191;5362833	F	NR	NR	NR	NR		180
(2E,6Z)-nona-2,6-dien-1-ol	trans, cis-2,6-nonadien-1-ol;2-trans-6-cis-nonadien-1-ol;violet alcohol;(E,Z)-2,6-nonadien-1-ol;nona-trans-2-cis-6-dien-1-ol;(E,Z)-2,6-nonadienol	AFC001020	AFC001020	5320191;5362833	F	NR	NR	NR	NR		111
(2E,6Z)-nona-2,6-dien-1-ol	trans, cis-2,6-nonadien-1-ol;2-trans-6-cis-nonadien-1-ol;violet alcohol;(E,Z)-2,6-nonadien-1-ol;nona-trans-2-cis-6-dien-1-ol;(E,Z)-2,6-nonadienol	AFC001020	AFC001020	5320191;5362833	F	NR	NR	NR	NR		35
(2E,6Z)-nona-2,6-dien-1-ol	trans, cis-2,6-nonadien-1-ol;2-trans-6-cis-nonadien-1-ol;violet alcohol;(E,Z)-2,6-nonadien-1-ol;nona-trans-2-cis-6-dien-1-ol;(E,Z)-2,6-nonadienol	AFC001020	AFC001020	5320191;5362833	J	36.07	36.07	NR	ug/L		146
(2E,6Z)-nona-2,6-dien-1-ol	trans, cis-2,6-nonadien-1-ol;2-trans-6-cis-nonadien-1-ol;violet alcohol;(E,Z)-2,6-nonadien-1-ol;nona-trans-2-cis-6-dien-1-ol;(E,Z)-2,6-nonadienol	AFC001020	AFC001020	5320191;5362833	F	24.4	24.4	NR	mg/100 g	cv F1 Oneida; grafts onto citron rootstocks were performed, see ref for details	187
(2E,6Z)-nona-2,6-dien-1-ol	trans, cis-2,6-nonadien-1-ol;2-trans-6-cis-nonadien-1-ol;violet alcohol;(E,Z)-2,6-nonadien-1-ol;nona-trans-2-cis-6-dien-1-ol;(E,Z)-2,6-nonadienol	AFC001020	AFC001020	5320191;5362833	F	65	65	NR	ng/g	cv Royal Armada fresh fruit; other samples include stored fruit, see ref for details	117
(2E,6Z)-nona-2,6-dien-1-ol	trans, cis-2,6-nonadien-1-ol;2-trans-6-cis-nonadien-1-ol;violet alcohol;(E,Z)-2,6-nonadien-1-ol;nona-trans-2-cis-6-dien-1-ol;(E,Z)-2,6-nonadienol	AFC001020	AFC001020	5320191;5362833	J	12.32	12.32	4.22	ug/L	cv Texiaofeng; data for 11 other cultivars are presented, see ref for details	126
(2E)-4-hydroxy-3-methylbut-2-enyl diphosphate	1-hydroxy-2-methyl-2-(E)-butenyl 4-diphosphate	AFC001261	AFC001261	5281976;21597501	U						33
(2R,3aS,3bS,8S,9aR,9bR,11aR)-1-[(2R)-2,6-dihydroxy-6-methyl-3-oxoheptan-2-yl]-2-hydroxy-3a,6,6,9b,11a-pentamethyl-8-{[(2S,3R,4S,5S,6R)-3,4,5-trihydroxy-6-(hydroxymethyl)oxan-2-yl]oxy}-1H,2H,3H,3bH,4H,8H,9H,9aH,11H-cyclopenta[a]phenanthrene-7,10-dione	NWOBCRRKTPFKMK-UHFFFAOYSA-N	AFC001789	AFC001789	no entry found	U						3
(2R,3R,4S,5R,6R)-2-(benzyloxy)-6-(hydroxymethyl)oxane-3,4,5-triol	GKHCBYYBLTXYEV-UHFFFAOYSA-N	AFC001800	AFC001810	4984739	U						3
(2R,3R,4S,5R,6R)-2-(hydroxymethyl)-6-[(4-hydroxyphenyl)methoxy]oxane-3,4,5-triol	WGBHVCJJFIVFAL-UHFFFAOYSA-N	AFC001799	AFC001799	49871128	U						3
(2R,3R,4S,5R,6S)-2-(hydroxymethyl)-6-[4-(hydroxymethyl)phenoxy]oxane-3,4,5-triol	PUQSUZTXKPLAPR-UHFFFAOYSA-N	AFC001798	AFC001817	3645183	U						3
(2R,3R)-pinobanksin		AFC000456	AFC000456	73202	U						33
(2R,3S,4S,5R,6R)-2-(hydroxymethyl)-6-[(4-hydroxyphenyl)methoxy]oxane-3,4,5-triol	WGBHVCJJFIVFAL-UHFFFAOYSA-N	AFC001821	AFC001799	49871127	U						3
(2R,3S)-3-isopropylmalate		AFC001113	AFC001113	6857402	U						33
(2R,4S)-2-methyl-2,3,3,4-tetrahydroxytetrahydrofuran		AFC000794	AFC000794	448719	U						33
(2R,4S)-2-methyl-2,4-dihydroxydihydrofuran-3-one	(R)-DHMF	AFC001373	AFC001149	44123557	U						33
(2R)-2-hydroxy-2-methylbutanenitrile		AFC001201	AFC001201	12650900	U						33
(2R)-phospho-3-sulfolactate	(2R)-2-O-phosphonato-3-sulfonatolactate	AFC001059	AFC001059	5460422	U						33
(2S,3R)-2,3-bis[(4-hydroxy-3-methoxyphenyl)methyl]1-butane-1,4-diol	PUETUDUXMCLALY-QFWKDIPCSA-N	AFC001794	AFC001794	no entry found	U						3
(2S,4aS,6aS,8aR,12aS,14aS,14bR)-10-hydroxy-2,4a,6a,9,9,12a,14a-heptamethyl-1,3,4,5,6,7,8,8a,10,11,12,13,14,14b-tetradecahydropicene-2-carboxylic acid		AFC001778	AFC000568	no entry found	U						3
(2S,4S)-2-methyl-2,3,3,4-tetrahydroxytetrahydrofuran	(S)-THMF	AFC001374	AFC000794	44123585	U						33
(2S,4S)-2-methyl-2,4-dihydroxydihydrofuran-3-one	(S)-DHMF	AFC001149	AFC001149	10240835	U						33
(2S,6S)-2,6-diaminoheptanedioic acid	L,L-diaminopimelate	AFC000660	AFC000842	439283	U						33
(2S)-2-amino-3-(6-benzyl-2-imino-1H-purin-9-yl)propanoic acid	AAAXGCLPRZBHJL-UHFFFAOYSA-N	AFC001788	AFC001788	no entry found	U						3
(2S)-2-amino-5-oxopentanoic acid	L-glutamate gamma-semialdehyde	AFC000615	AFC000615	193305	U						33
(2S)-2-hydroxybutanedioic acid	(S)-malic acid;L-malic acid	AFC000624	AFC000074	222656	H	NR	NR	NR	NR		178
(2S)-2-hydroxybutanedioic acid	(S)-malic acid;L-malic acid	AFC000624	AFC000074	222656	U						33
(2S)-2-isopropyl-3-oxosuccinate		AFC001069	AFC001069	5462259	U						33
(2S)-2-isopropylmalate	2-isopropylmalate	AFC000888	AFC000888	5280523	H	NR	NR	NR	NR		178
(2S)-2-isopropylmalate	2-isopropylmalate	AFC000888	AFC000888	5280523	U						33
(2S)-6-amino-2-formamidohexanamide	APO-[3-methylcrotonoyl-CoA:carbon-dioxide ligase (ADP-forming)];N2-formyl-L-lysinamide	AFC001334	AFC001334	25244460	U						33
(2S)-pinocembrin		AFC000443	AFC000443	68071	U						33
(2Z)-2-(5-oxofuran-2-ylidene)acetate	cis-dienelactone	AFC001130	AFC001130	9543216	U						33
(3E,6R)-6-[(1R,2R,3aS,3bS,4S,9aR,9bS,11aR)-2,4-dihydroxy-3a,6,6,9b,11a-pentamethyl-7,10-dioxo-8-{[(2S,3R,4S,5S,6R)-3,4,5-trihydroxy-6-(hydroxymethyl)oxan-2-yl]oxy}-1H,2H,3H,3bH,4H,9aH,11H-cyclopenta[a]phenanthren-1-yl]-6-hydroxy-2-methyl-5-oxohept-3-en-2-yl acetate	VJTYFWONTVLZJR-UHFFFAOYSA-N	AFC001808	AFC001801	no entry found	U						3
(3E,6S)-6-[(1R,2R,3aS,3bS,4R,9aR,9bS,11aR)-2,4-dihydroxy-3a,6,6,9b,11a-pentamethyl-7,10-dioxo-8-{[(2S,3R,4S,5S,6R)-3,4,5-trihydroxy-6-(hydroxymethyl)oxan-2-yl]oxy}-1H,2H,3H,3bH,4H,9aH,11H-cyclopenta[a]phenanthren-1-yl]-6-hydroxy-2-methyl-5-oxohept-3-en-2-yl acetate	VJTYFWONTVLZJR-UHFFFAOYSA-N	AFC001801	AFC001801	no entry found	U						3
(3R,4S)-3-amino-4-methylhexanoic acid	L-beta-homoisoleucine	AFC001851	AFC001851	16211048	F	NR	NR	NR	NR	see reference for details	26
(3R)-3-hydroxy-2-oxo-4-phosphonooxybutanoate	2-oxo-3-hydroxy-4-phosphobutanoate	AFC001258	AFC001258	21145142	U						33
(3R)-3-hydroxy-3-methyl-5-(phosphonooxy)pentanoic acid	mevalonate-5-phosphate	AFC000672	AFC000672	439400	U						33
(3R)-linalool		AFC000741	AFC000263	443158	U						33
(3S,5R,6R)-3,5-dihydroxy-6,7-didehydro-5,6-dihydro-12'-apo-beta-caroten-12'-al		AFC000965	AFC000965	5282319	U						33
(3S,5R,6S)-5,6-epoxy-3-hydroxy-5,6-dihydro-12'-apo-beta-caroten-12'-al		AFC000966	AFC000966	5282320	U						33
(3S)-2,3-epoxy-2,3-dihydrosqualene	(S)-2,3-epoxysqualene	AFC001042	AFC001031	5459811	U						33
(3S)-linalool		AFC000441	AFC000263	67179	U						33
(3Z,6Z)-3,6-nonadien-1-ol	(Z,Z)-3,6-nonadien-1-ol;nona-cis-3-cis-6-dien-1-ol	AFC001094	AFC001094	6434541	F	1	3.7	NR	percent VOC		171
(3Z,6Z)-3,6-nonadien-1-ol	(Z,Z)-3,6-nonadien-1-ol;nona-cis-3-cis-6-dien-1-ol	AFC001094	AFC001094	6434541	F	0.149	0.633	NR	ug/kg	several mini-melons sampled	148
(3Z,6Z)-3,6-nonadien-1-ol	(Z,Z)-3,6-nonadien-1-ol;nona-cis-3-cis-6-dien-1-ol	AFC001094	AFC001094	6434541	F	NR	NR	NR	NR		152
(3Z,6Z)-3,6-nonadien-1-ol	(Z,Z)-3,6-nonadien-1-ol;nona-cis-3-cis-6-dien-1-ol	AFC001094	AFC001094	6434541	F,J	NR	NR	NR	NR		35
(3Z,6Z)-3,6-nonadien-1-ol	(Z,Z)-3,6-nonadien-1-ol;nona-cis-3-cis-6-dien-1-ol	AFC001094	AFC001094	6434541	H	NR	NR	NR	NR		190
(3Z,6Z)-3,6-nonadien-1-ol	(Z,Z)-3,6-nonadien-1-ol;nona-cis-3-cis-6-dien-1-ol	AFC001094	AFC001094	6434541	J	NR	NR	NR	NR		159
(3Z,6Z)-3,6-nonadien-1-ol	(Z,Z)-3,6-nonadien-1-ol;nona-cis-3-cis-6-dien-1-ol	AFC001094	AFC001094	6434541	F	2908	2908	NR	ng/g	cv Royal Armada fresh fruit; other samples include stored fruit, see ref for details	117
(3Z)-phytochromobilin		AFC000919	AFC000919	5280865	U						33
(4-hydroxyphenyl)acetaldehyde	4-hydroxyphenylacetaldehyde	AFC000705	AFC000705	440113	U						33
(4-hydroxyphenyl)methanol 4-β-d-apiofuranosyl-O-β-d-glucopyranoside	(4-hydroxyphenyl)methanol 4-[β-d-apiofuranosyl(1→2)-O-β-d-glucopyranoside]	AFC001606	AFC001606	no entry found	S	NR	NR	NR	NR		184
(4E)-5,9-dimethyldeca-4,8-dien-2-one	geranylacetol	AFC001085	AFC001085	6381418	F	NR	NR	NR	ug/kg	several mini-melons sampled	148
(6-4) photoproduct (in DNA)		AFC001607	AFC001607	no entry found	U						33
(6E)-8-hydroxygeranial		AFC001211	AFC001211	13895495	U						33
(6E)-8-oxogeranial		AFC001158	AFC001158	11073781	U						33
(6E)-8-oxogeraniol		AFC001164	AFC001164	11412603	U						33
(9Z,11E,14Z)-(13S)-hydroperoxyoctadeca-(9,11,14)-trienoate	13S-hydroperoxy-9Z,11E,14Z-octadecatrienoic acid;13S-HpOTrE	AFC001134	AFC001134	5280730	U						33
(9Z)-(13S)-12,13-epoxyoctadeca-9,11-dienoate		AFC001406	AFC001406	46878374	U						33
(cis)-crotonaldehyde		AFC000822	AFC000822	643950	U						33
(E,E)-2,4-decadienal	deca-trans-2-trans-4-dien-1-al	AFC000977	AFC000977	5283349	F	2.6	2.6	NR	ng/g	C. vulgaris Schrad	163
(E,E)-2,4-decadienal	deca-trans-2-trans-4-dien-1-al	AFC000977	AFC000977	5283349	F	NR	NR	NR	NR		180
(E,E)-2,4-decadienal	deca-trans-2-trans-4-dien-1-al	AFC000977	AFC000977	5283349	J	NR	NR	NR	NR		35
(E,E)-2,4-decadienal	deca-trans-2-trans-4-dien-1-al	AFC000977	AFC000977	5283349	F	4.1	4.1	NR	mg/100 g	cv F1 Oneida; grafts onto citron rootstocks were performed, see ref for details	187
(E,E)-2,4-nonadienal		AFC001539	AFC001092	5283339	F	1.1	1.1	NR	ng/g	C. vulgaris Schrad	163
(E,E)-2,4-nonadienal		AFC001539	AFC001092	5283339	F	0.004	0.008	NR	ug/kg	several mini-melons sampled	148
(E,E)-2,4-nonadienal		AFC001539	AFC001092	5283339	J	NR	NR	NR	NR		159
(E,E)-2,4-nonadienal		AFC001539	AFC001092	5283339	J	2.18	2.18	NR	ug/L		146
(E,E)-2,4-nonadienal		AFC001539	AFC001092	5283339	F	2.6	2.6	NR	mg/100 g	cv F1 Oneida; grafts onto citron rootstocks were performed, see ref for details	187
(E,E)-2,6-nonadienal		AFC001481	AFC000818	88369124	F	NR	0.001	NR	ug/kg	several mini-melons sampled	148
(E,E)-3,6-nonadien-1-ol	trans,trans-3,6-nonadien-1-ol	AFC001608	AFC001094	no entry found	F	0.007	0.009	NR	ug/kg	several mini-melons sampled	148
(E,E)-alpha-farnesene		AFC000942	AFC000942	5281516	U						33
(E,Z)-2,4-decadienal	deca-trans-2-cis-4-dien-1-al	AFC001089	AFC000977	6427087	J	NR	NR	NR	NR		35
(E,Z)-2,4-heptadienal	hepta-trans-2-cis-4-dien-1-al	AFC001168	AFC000971	11788274	J	NR	NR	NR	NR		35
(E,Z)-2,4-nonadienal		AFC001092	AFC001092	6429282	F	0.009	0.022	NR	ug/kg	several mini-melons sampled	148
(E,Z)-3,6-nonadien-1-ol		AFC001389	AFC001094	44630408	F	NR	NR	NR	NR		111
(E,Z)-3,6-nonadien-1-ol		AFC001389	AFC001094	44630408	J	NR	NR	NR	NR		146
(E,Z)-3,6-nonadien-1-ol		AFC001389	AFC001094	44630408	J	95.46	95.46	26.19	ug/L	cv Lizhiguan; data for 11 other cultivars are presented, see ref for details	126
(E)-2-benzylidenesuccinyl-CoA		AFC001126	AFC001126	9543003	U						33
(E)-2-butenal	crotonaldehyde	AFC000790	AFC000790	447466	F	0.001	14.88	NR	ug/kg	cv Proteo ungrafted watermelon	173
(E)-2-butenal	crotonaldehyde	AFC000790	AFC000790	447466	F	NR	0.001	NR	ug/kg	several mini-melons sampled	148
(E)-2-butenal	crotonaldehyde	AFC000790	AFC000790	447466	J	NR	NR	NR	NR		159
(E)-2-decen-1-ol		AFC001027	AFC001027	5364942	J	NR	NR	NR	NR		146
(E)-2-nonen-1-ol	trans-2-nonen-1-ol;non-trans-2-en-1-ol	AFC001026	AFC001026	5364941	F	NR	NR	NR	NR		35
(E)-2-nonen-1-ol	trans-2-nonen-1-ol;non-trans-2-en-1-ol	AFC001026	AFC001026	5364941	J	NR	NR	NR	NR		111
(E)-2-nonen-1-ol	trans-2-nonen-1-ol;non-trans-2-en-1-ol	AFC001026	AFC001026	5364941	J	NR	NR	NR	NR		146
(E)-2-nonen-1-ol	trans-2-nonen-1-ol;non-trans-2-en-1-ol	AFC001026	AFC001026	5364941	F	219	219	NR	ng/g	cv Royal Armada fresh fruit; other samples include stored fruit, see ref for details	117
(E)-2-nonen-1-ol	trans-2-nonen-1-ol;non-trans-2-en-1-ol	AFC001026	AFC001026	5364941	J	4.82	4.82	8.35	ug/L	cv Lizhiguan; data for 11 other cultivars are presented, see ref for details	126
(E)-6-nonenal		AFC000975	AFC000975	5283338	F	NR	NR	NR	NR		180
(E)-6-nonenal		AFC000975	AFC000975	5283338	F	0.011	0.031	NR	ug/kg	several mini-melons sampled	148
(E)-beta-farnesene		AFC000943	AFC000943	5281517	U						33
(E)-beta-ocimene		AFC000948	AFC000948	5281553	U						33
(E)-cinnamoyl-CoA		AFC001419	AFC001419	6444037	U						33
(E)-indol-3-ylacetaldoxime		AFC001035	AFC001035	5371769	U						33
(E)-nerolidol		AFC000946	AFC000946	5281525	F	NR	0.001	NR	ug/kg	several mini-melons sampled	148
(E)-non-6-en-1-ol	(E)-6-nonenol;6-nonen-1-ol	AFC001018	AFC001017	5362811	F	NR	NR	NR	NR		180
(KDO)-lipid IVA(5-)	alpha-Kdo-(2->6)-lipid IVA	AFC001365	AFC001365	25246208	U						33
(KDO)2-(lauroyl)-lipid IVA		AFC001335	AFC001335	25244565	U						33
(N(omega)-L-arginino)succinate(1-)	L-arginino-succinate	AFC001407	AFC001407	46878376	F	NR	NR	NR	NR	see reference for details	26
(N(omega)-L-arginino)succinate(1-)	L-arginino-succinate	AFC001407	AFC001407	46878376	U						33
(R,R)-2,3-butanediol		AFC000625	AFC000625	225936	F	NR	NR	NR	NR		111
(R)-3-hydroxybutanoyl-CoA		AFC001184	AFC001127	11966146	U						33
(R)-3-methylene-6-((S)-1,2,2-trimethylcyclopentyl)cyclohex-1-ene	delta-cuprenene	AFC001319	AFC001319	25202927	U						33
(R)-lactate		AFC000421	AFC000421	61503	U						33
(R)-lipoate		AFC000843	AFC000843	1549144	U						33
(R)-mandelonitrile		AFC001137	AFC001137	9548674	U						33
(R)-mevalonate		AFC000991	AFC000991	5288798	U						33
(R)-NADHX		AFC001459	AFC001459	56927861	U						33
(R)-pantoate		AFC000992	AFC000992	5289105	U						33
(S)-(-)-2-hydroxyisocaproic acid	L-leucic acid;(S)-2-hydroxy-4-methylpentanoic acid	AFC000466	AFC000466	83697	H	NR	NR	NR	NR		178
(S)-(+)-allantoin	S-allantoin	AFC000698	AFC000027	439714	U						33
(S)-1-piperideine-6-carboxylate	(S)-2,3,4,5-tetrahydropiperidine-2-carboxylate	AFC001395	AFC001395	45266761	U						33
(S)-1-pyrroline-5-carboxylate		AFC000707	AFC000707	440162	U						33
(S)-2-acetolactate	(2S)-2-hydroxy-2-methyl-3-oxobutanoic acid	AFC000726	AFC000726	440878	U						33
(S)-2-amino-6-oxopimelate	L-alpha-amino-epsilon-keto-pimelate	AFC001317	AFC001317	25202391	U						33
(S)-2,3-dihydrodipicolinate		AFC001051	AFC001051	5460228	U						33
(S)-2,3,4,5-tetrahydrodipicolinate		AFC001058	AFC001058	5460405	U						33
(S)-3-amino-2-methylpropanoate		AFC000677	AFC000677	439434	U						33
(S)-3-hydroxy-3-methylglutaryl-CoA	HMG-CoA	AFC000770	AFC000770	445127	U						33
(S)-3-hydroxy-isobutyrate		AFC001249	AFC001249	18637352	U						33
(S)-3-hydroxy-isobutyryl-CoA		AFC001403	AFC001403	46173510	U						33
(S)-3-hydroxybutanoyl-CoA		AFC001127	AFC001127	9543037	U						33
(S)-beta-bisabolene		AFC001146	AFC001146	10104370	U						33
(S)-beta-macrocarpene		AFC001424	AFC001424	49859620	U						33
(S)-dihydroorotate		AFC000648	AFC000648	439216	U						33
(S)-lactate		AFC000511	AFC000421	107689	U						33
(S)-methylmalonate-semialdehyde		AFC001401	AFC001401	46173457	U						33
(S)-NADHX		AFC000715	AFC000715	440516	U						33
(S)-norcoclaurine		AFC000728	AFC000728	440927	U						33
(S)-ureidoglycine		AFC001402	AFC001402	46173475	U						33
(Z,E)-alpha-farnesene		AFC001021	AFC000942	5362889	U						33
(Z,Z)-2,6-nonadienol		AFC001509	AFC001020	92450317	F	NR	NR	NR	NR		180
(Z,Z)-3,6-nonadienal	3,6-nonadienal;nona-cis-3,6-cis-dien-1-al	AFC001008	AFC001008	5352808	F	NR	NR	NR	NR		180
(Z,Z)-3,6-nonadienal	3,6-nonadienal;nona-cis-3,6-cis-dien-1-al	AFC001008	AFC001008	5352808	J	NR	NR	NR	NR		146
(Z,Z)-3,6-nonadienal	3,6-nonadienal;nona-cis-3,6-cis-dien-1-al	AFC001008	AFC001008	5352808	J	NR	NR	NR	NR		35
(Z)-2-decenal		AFC001012	AFC000976	5354834	F	NR	0.004	NR	ug/kg	several mini-melons sampled	148
(Z)-2-heptenal		AFC001015	AFC000970	5362616	F	NR	0.009	NR	ug/kg	several mini-melons sampled	148
(Z)-2-hexenal		AFC001090	AFC000928	6428782	F	NR	0.02	NR	ug/kg	several mini-melons sampled	148
(Z)-2-nonenal		AFC001011	AFC000973	5354833	F	0.334	0.578	NR	ug/kg	several mini-melons sampled	148
(Z)-2-octenal		AFC001088	AFC000972	6427080	F	0.006	0.027	NR	ug/kg	several mini-melons sampled	148
(Z)-3-nonenal	non-cis-3-en-1-l	AFC001093	AFC001093	6431042	F	NR	NR	NR	NR		180
(Z)-3-nonenal	non-cis-3-en-1-l	AFC001093	AFC001093	6431042	J	NR	NR	NR	NR		35
(Z)-3-octen-2-one		AFC001091	AFC001091	6429262	F	0.005	0.011	NR	ug/kg	several mini-melons sampled	148
(Z)-4-heptenal		AFC001019	AFC001019	5362814	F,J	NR	NR	NR	NR		159
(Z)-6-nonenal		AFC001016	AFC000975	5362720	F	6244	6244	2123	ug/kg	variety Rugby, see reference for values in unripe and overripe fruit	142
(Z)-6-nonenal		AFC001016	AFC000975	5362720	F	0.058	60.73	NR	ug/kg	cv Proteo ungrafted watermelon	173
(Z)-6-nonenal		AFC001016	AFC000975	5362720	F	6	6	NR	ng/g	C. vulgaris Schrad	163
(Z)-6-nonenal		AFC001016	AFC000975	5362720	F	0.04	0.076	NR	ug/kg	several mini-melons sampled	148
(Z)-6-nonenal		AFC001016	AFC000975	5362720	F,H	4.1	9.8	NR	percent VOC		171
(Z)-6-nonenal		AFC001016	AFC000975	5362720	H	NR	NR	NR	NR		190
(Z)-6-nonenal		AFC001016	AFC000975	5362720	J	NR	NR	NR	NR		159
(Z)-6-nonenal		AFC001016	AFC000975	5362720	J	17.87	17.87	NR	ug/L		146
(Z)-6-nonenal		AFC001016	AFC000975	5362720	F	94.6	94.6	NR	mg/100 g	cv F1 Oneida; grafts onto citron rootstocks were performed, see ref for details	187
(Z)-6-nonenal		AFC001016	AFC000975	5362720	F	260	260	NR	ng/g	cv Royal Armada fresh fruit; other samples include stored fruit, see ref for details	117
(Z)-beta-ocimene		AFC001004	AFC000948	5320250	U						33
(Z)-butanethiol-S-oxide	butanethiol-S-oxide	AFC001609	AFC001609	no entry found	U						33
(Z)-indol-3-ylacetaldoxime		AFC001045	AFC001045	5459978	U						33
(Z)-non-6-en-1-ol	cis-6-nonen-1-ol;(Z)-non-6-en-1-ol;(Z)-6-nonen-1-ol;cis-6-nonenol;(6Z)-6-nonen-1-ol;(6Z)-non-6-en-1-ol;(6Z)-nonen-1-ol;non-cis-6-en-1-ol	AFC001017	AFC001017	5362792	F	280	280	62	ug/kg	variety Rugby, see reference for values in unripe and overripe fruit	142
(Z)-non-6-en-1-ol	cis-6-nonen-1-ol;(Z)-non-6-en-1-ol;(Z)-6-nonen-1-ol;cis-6-nonenol;(6Z)-6-nonen-1-ol;(6Z)-non-6-en-1-ol;(6Z)-nonen-1-ol;non-cis-6-en-1-ol	AFC001017	AFC001017	5362792	F	0.088	24.04	NR	ug/kg	cv Proteo ungrafted watermelon	173
(Z)-non-6-en-1-ol	cis-6-nonen-1-ol;(Z)-non-6-en-1-ol;(Z)-6-nonen-1-ol;cis-6-nonenol;(6Z)-6-nonen-1-ol;(6Z)-non-6-en-1-ol;(6Z)-nonen-1-ol;non-cis-6-en-1-ol	AFC001017	AFC001017	5362792	F	34.7	34.7	NR	ng/g	C. vulgaris Schrad	163
(Z)-non-6-en-1-ol	cis-6-nonen-1-ol;(Z)-non-6-en-1-ol;(Z)-6-nonen-1-ol;cis-6-nonenol;(6Z)-6-nonen-1-ol;(6Z)-non-6-en-1-ol;(6Z)-nonen-1-ol;non-cis-6-en-1-ol	AFC001017	AFC001017	5362792	F	NR	NR	NR	NR		180
(Z)-non-6-en-1-ol	cis-6-nonen-1-ol;(Z)-non-6-en-1-ol;(Z)-6-nonen-1-ol;cis-6-nonenol;(6Z)-6-nonen-1-ol;(6Z)-non-6-en-1-ol;(6Z)-nonen-1-ol;non-cis-6-en-1-ol	AFC001017	AFC001017	5362792	F	0.019	0.088	NR	ug/kg	several mini-melons sampled	148
(Z)-non-6-en-1-ol	cis-6-nonen-1-ol;(Z)-non-6-en-1-ol;(Z)-6-nonen-1-ol;cis-6-nonenol;(6Z)-6-nonen-1-ol;(6Z)-non-6-en-1-ol;(6Z)-nonen-1-ol;non-cis-6-en-1-ol	AFC001017	AFC001017	5362792	F	NR	NR	NR	NR		152
(Z)-non-6-en-1-ol	cis-6-nonen-1-ol;(Z)-non-6-en-1-ol;(Z)-6-nonen-1-ol;cis-6-nonenol;(6Z)-6-nonen-1-ol;(6Z)-non-6-en-1-ol;(6Z)-nonen-1-ol;non-cis-6-en-1-ol	AFC001017	AFC001017	5362792	F,H	0.8	3.6	NR	percent VOC	enantiomer not distinguished	171
(Z)-non-6-en-1-ol	cis-6-nonen-1-ol;(Z)-non-6-en-1-ol;(Z)-6-nonen-1-ol;cis-6-nonenol;(6Z)-6-nonen-1-ol;(6Z)-non-6-en-1-ol;(6Z)-nonen-1-ol;non-cis-6-en-1-ol	AFC001017	AFC001017	5362792	F,J	NR	NR	NR	NR		35
(Z)-non-6-en-1-ol	cis-6-nonen-1-ol;(Z)-non-6-en-1-ol;(Z)-6-nonen-1-ol;cis-6-nonenol;(6Z)-6-nonen-1-ol;(6Z)-non-6-en-1-ol;(6Z)-nonen-1-ol;non-cis-6-en-1-ol	AFC001017	AFC001017	5362792	H	NR	NR	NR	NR		190
(Z)-non-6-en-1-ol	cis-6-nonen-1-ol;(Z)-non-6-en-1-ol;(Z)-6-nonen-1-ol;cis-6-nonenol;(6Z)-6-nonen-1-ol;(6Z)-non-6-en-1-ol;(6Z)-nonen-1-ol;non-cis-6-en-1-ol	AFC001017	AFC001017	5362792	J	NR	NR	NR	NR		159
(Z)-non-6-en-1-ol	cis-6-nonen-1-ol;(Z)-non-6-en-1-ol;(Z)-6-nonen-1-ol;cis-6-nonenol;(6Z)-6-nonen-1-ol;(6Z)-non-6-en-1-ol;(6Z)-nonen-1-ol;non-cis-6-en-1-ol	AFC001017	AFC001017	5362792	J	12.85	12.85	NR	ug/L		146
(Z)-non-6-en-1-ol	cis-6-nonen-1-ol;(Z)-non-6-en-1-ol;(Z)-6-nonen-1-ol;cis-6-nonenol;(6Z)-6-nonen-1-ol;(6Z)-non-6-en-1-ol;(6Z)-nonen-1-ol;non-cis-6-en-1-ol	AFC001017	AFC001017	5362792	F	53.1	53.1	NR	mg/100 g	cv F1 Oneida; grafts onto citron rootstocks were performed, see ref for details	187
(Z)-non-6-en-1-ol	cis-6-nonen-1-ol;(Z)-non-6-en-1-ol;(Z)-6-nonen-1-ol;cis-6-nonenol;(6Z)-6-nonen-1-ol;(6Z)-non-6-en-1-ol;(6Z)-nonen-1-ol;non-cis-6-en-1-ol	AFC001017	AFC001017	5362792	F	507	507	NR	ng/g	cv Royal Armada fresh fruit; other samples include stored fruit, see ref for details	117
[4-(5,5-dimethylcyclohex-1-en-1-yl)-cyclohex-1-en-1-yl] methanol		AFC001543	AFC001543	134716635	U						33
1-({[5-(α-d-galactopyranosyloxy)methyl]-1H-pyrrole-2-carbaldehyde-1-yl}-ethyl)-1H-pyrazole		AFC001610	AFC001610	no entry found	S	NR	NR	NR	NR		184
1-(2-carboxyphenylamino)-1-deoxy-D-ribulose 5-phosphate	1-(o-carboxyphenylamino)-1'-deoxyribulose-5'-phosphate	AFC000784	AFC000784	446894	U						33
1-(5-phospho-D-ribosyl)-AMP	phosphoribosyl-AMP	AFC001191	AFC001191	11988267	U						33
1-(5-phosphoribosyl)-5-[(5-phosphoribosylamino)methylideneamino]imidazole-4-carboxamide	5’ProFAR	AFC001050	AFC001050	5460212	U						33
1-(9Z-hexadecenoyl)-sn-glycero-3-phosphocholine	LysoPC(16:1(9Z)/0:0)	AFC001920	AFC001920	24779461	F	NR	NR	NR	NR	see reference for details	26
1-(9Z-octadecenoyl)-sn-glycero-3-phosphocholine	LPC(1-acyl 18:1)	AFC001926	AFC001926	16081932	F	NR	NR	NR	NR	see reference for details	26
1-[2-(5-hydroxymethyl-1H-pyrrole-2-carbaldehyde-1-yl)ethyl]-1H-pyrazole		AFC001611	AFC001611	no entry found	S	NR	NR	NR	NR		184
1-aminocyclopropane-1-carboxylate	1-aminocyclopropanecarboxylic acid	AFC000077	AFC000077	535	U						33
1-butanol	butan-1-ol;n-butanol	AFC000045	AFC000045	263	F	45.1	45.1	NR	ug/kg	cv Proteo ungrafted watermelon	173
1-butanol	butan-1-ol;n-butanol	AFC000045	AFC000045	263	F	NR	NR	NR	NR		152
1-butanol	butan-1-ol;n-butanol	AFC000045	AFC000045	263	J	NR	NR	NR	NR		159
1-butanol	butan-1-ol;n-butanol	AFC000045	AFC000045	263	J	NR	NR	NR	NR		146
1-butanol	butan-1-ol;n-butanol	AFC000045	AFC000045	263	J	NR	NR	NR	NR		35
1-butanol	butan-1-ol;n-butanol	AFC000045	AFC000045	263	U						33
1-butanol	butan-1-ol;n-butanol	AFC000045	AFC000045	263	U						3
1-butenesulfenate		AFC001480	AFC001480	87828817	U						33
1-chloro-2,4-dinitrobenzene		AFC000001	AFC000001	6	U						33
1-decanol	decan-1-ol;decyl alcohol	AFC001831	AFC001831	8174	F	2.1	2.1	NR	ng/g	C. vulgaris Schrad	163
1-decanoyl-sn-glycero-3-phosphocholine	1-decanoyl-2-hydroxy-sn-glycero-3-phosphocholine;1-decanoyllysolecithin;1-capryl-2-lysophosphatidylcholine	AFC001909	AFC001909	22851442	F	NR	NR	NR	NR	see reference for details	26
1-deoxy-D-xylulose 5-phosphate		AFC000745	AFC000745	443201	F	NR	NR	NR	NR		180
1-deoxy-D-xylulose 5-phosphate		AFC000745	AFC000745	443201	U						33
1-deoxy-L-glycero-tetrulose 4-phosphate	(2S)-2-hydroxy-3-oxobutyl phosphate	AFC001217	AFC001217	14056322	U						33
1-dodecanol	dodecan-1-ol	AFC000305	AFC000305	8193	F	0.005	0.011	NR	ug/kg	several mini-melons sampled	148
1-dodecanol	dodecan-1-ol	AFC000305	AFC000305	8193	J	NR	NR	NR	NR		35
1-dodecanol	dodecan-1-ol	AFC000305	AFC000305	8193	U						33
1-dodecanol	dodecan-1-ol	AFC000305	AFC000305	8193	U						3
1-dodecanoyl-sn-glycero-3-phosphocholine	LPC(1-acyl 12:1)	AFC001913	AFC001913	460605	F	NR	NR	NR	NR	see reference for details	26
1-heptanol		AFC000301	AFC000301	8129	F	32.54	32.54	NR	ug/kg	cv Proteo ungrafted watermelon	173
1-heptanol		AFC000301	AFC000301	8129	J	NR	NR	NR	NR		159
1-heptanol		AFC000301	AFC000301	8129	F	12	12	NR	ng/g	cv Royal Armada fresh fruit; other samples include stored fruit, see ref for details	117
1-hexanol	hexan-1-ol	AFC000300	AFC000300	8103	F	79	79	16	ug/kg	variety Rugby, see reference for values in unripe and overripe fruit	142
1-hexanol	hexan-1-ol	AFC000300	AFC000300	8103	F	0.088	618.42	NR	ug/kg	cv Proteo ungrafted watermelon	173
1-hexanol	hexan-1-ol	AFC000300	AFC000300	8103	F	151.5	151.5	NR	ng/g	C. vulgaris Schrad	163
1-hexanol	hexan-1-ol	AFC000300	AFC000300	8103	F	NR	NR	NR	NR		180
1-hexanol	hexan-1-ol	AFC000300	AFC000300	8103	F	NR	NR	NR	NR		111
1-hexanol	hexan-1-ol	AFC000300	AFC000300	8103	F	0.031	0.088	NR	ug/kg	several mini-melons sampled	148
1-hexanol	hexan-1-ol	AFC000300	AFC000300	8103	F	NR	NR	NR	NR		152
1-hexanol	hexan-1-ol	AFC000300	AFC000300	8103	J	NR	NR	NR	NR		159
1-hexanol	hexan-1-ol	AFC000300	AFC000300	8103	J	NR	NR	NR	NR		146
1-hexanol	hexan-1-ol	AFC000300	AFC000300	8103	J	NR	NR	NR	NR		35
1-hexanol	hexan-1-ol	AFC000300	AFC000300	8103	U						3
1-hexanol	hexan-1-ol	AFC000300	AFC000300	8103	F	60	60	NR	mg/100 g	cv F1 Oneida; grafts onto citron rootstocks were performed, see ref for details	187
1-hexanol	hexan-1-ol	AFC000300	AFC000300	8103	F	139	139	NR	ng/g	cv Royal Armada fresh fruit; other samples include stored fruit, see ref for details	117
1-linoleoyl-sn-glycero-3-phosphocholine	LPC(1-acyl 18:2)	AFC001925	AFC001925	11005824	F	NR	NR	NR	NR	see reference for details	26
1-methyladenosine		AFC001893	AFC001893	27476	F	NR	NR	NR	NR	see reference for details	26
1-nonanol	nonan-1-ol	AFC000317	AFC000317	8914	F	44	44	2	ug/kg	variety Rugby, see reference for values in unripe and overripe fruit	142
1-nonanol	nonan-1-ol	AFC000317	AFC000317	8914	F	0.342	42.66	NR	ug/kg	cv Proteo ungrafted watermelon	173
1-nonanol	nonan-1-ol	AFC000317	AFC000317	8914	F	292.4	292.4	NR	ng/g	C. vulgaris Schrad	163
1-nonanol	nonan-1-ol	AFC000317	AFC000317	8914	F	0	1.2	NR	percent VOC		171
1-nonanol	nonan-1-ol	AFC000317	AFC000317	8914	F	NR	NR	NR	NR		180
1-nonanol	nonan-1-ol	AFC000317	AFC000317	8914	F	NR	NR	NR	NR		111
1-nonanol	nonan-1-ol	AFC000317	AFC000317	8914	F	0.078	0.342	NR	ug/kg	several mini-melons sampled	148
1-nonanol	nonan-1-ol	AFC000317	AFC000317	8914	F	NR	NR	NR	NR		152
1-nonanol	nonan-1-ol	AFC000317	AFC000317	8914	F,J	NR	NR	NR	NR		35
1-nonanol	nonan-1-ol	AFC000317	AFC000317	8914	H	NR	NR	NR	NR		190
1-nonanol	nonan-1-ol	AFC000317	AFC000317	8914	J	NR	NR	NR	NR		159
1-nonanol	nonan-1-ol	AFC000317	AFC000317	8914	J	NR	NR	NR	NR		146
1-nonanol	nonan-1-ol	AFC000317	AFC000317	8914	U						3
1-nonanol	nonan-1-ol	AFC000317	AFC000317	8914	F	170.3	170.3	NR	mg/100 g	cv F1 Oneida; grafts onto citron rootstocks were performed, see ref for details	187
1-nonanol	nonan-1-ol	AFC000317	AFC000317	8914	F	1249	1249	NR	ng/g	cv Royal Armada fresh fruit; other samples include stored fruit, see ref for details	117
1-nonanol	nonan-1-ol	AFC000317	AFC000317	8914	J	86.77	86.77	9.06	ug/L	cv Lizhiguan; data for 11 other cultivars are presented, see ref for details	126
1-O-sinapoyl-beta-D-glucose	sinapic acid glucoside 2	AFC000876	AFC000876	5280406	F,R,S	3.7	3.7	0.8	ug/100g	detected in rind 33.1±4.3; detected in seed 47.1±5.0	144
1-O-sinapoyl-beta-D-glucose	sinapic acid glucoside 2	AFC000876	AFC000876	5280406	U						33
1-octacosanol	n-octacosanol	AFC000444	AFC000444	68406	F	NR	NR	NR	NR		35
1-octanol	octan-1-ol	AFC000142	AFC000142	957	F	0.036	201.76	NR	ug/kg	cv Proteo ungrafted watermelon	173
1-octanol	octan-1-ol	AFC000142	AFC000142	957	F	30.8	30.8	NR	ng/g	C. vulgaris Schrad	163
1-octanol	octan-1-ol	AFC000142	AFC000142	957	F	NR	NR	NR	NR		111
1-octanol	octan-1-ol	AFC000142	AFC000142	957	F	0.03	0.037	NR	ug/kg	several mini-melons sampled	148
1-octanol	octan-1-ol	AFC000142	AFC000142	957	F	NR	NR	NR	NR		152
1-octanol	octan-1-ol	AFC000142	AFC000142	957	H	NR	NR	NR	NR		190
1-octanol	octan-1-ol	AFC000142	AFC000142	957	J	NR	NR	NR	NR		159
1-octanol	octan-1-ol	AFC000142	AFC000142	957	J	NR	NR	NR	NR		146
1-octanol	octan-1-ol	AFC000142	AFC000142	957	J	NR	NR	NR	NR		35
1-octanol	octan-1-ol	AFC000142	AFC000142	957	U						3
1-octanol	octan-1-ol	AFC000142	AFC000142	957	F	14.3	14.3	NR	mg/100 g	cv F1 Oneida; grafts onto citron rootstocks were performed, see ref for details	187
1-octen-3-ol	oct-1-en-3-ol	AFC000378	AFC000378	18827	F,J	NR	NR	NR	NR		159
1-octen-3-ol	oct-1-en-3-ol	AFC000378	AFC000378	18827	J	NR	NR	NR	NR		35
1-octen-3-ol	oct-1-en-3-ol	AFC000378	AFC000378	18827	U						3
1-octen-3-ol	oct-1-en-3-ol	AFC000378	AFC000378	18827	F	136	136	NR	ng/g	cv Royal Armada fresh fruit; other samples include stored fruit, see ref for details	117
1-octen-3-one	oct-1-en-3-one;octen-3-one	AFC000420	AFC000420	61346	F	NR	0.001	NR	ug/kg	several mini-melons sampled	148
1-octen-3-one	oct-1-en-3-one;octen-3-one	AFC000420	AFC000420	61346	F,J	NR	NR	NR	NR		159
1-octen-3-one	oct-1-en-3-one;octen-3-one	AFC000420	AFC000420	61346	J	NR	NR	NR	NR		146
1-octen-3-one	oct-1-en-3-one;octen-3-one	AFC000420	AFC000420	61346	J	NR	NR	NR	NR		35
1-octen-3-one	oct-1-en-3-one;octen-3-one	AFC000420	AFC000420	61346	U						3
1-octen-3-one	oct-1-en-3-one;octen-3-one	AFC000420	AFC000420	61346	F	10	10	NR	ng/g	cv Royal Armada fresh fruit; other samples include stored fruit, see ref for details	117
1-palmitoyl-lysophosphatidylcholine	LPC(1-acyl 16:0)	AFC001921	AFC001921	10097314	F	NR	NR	NR	NR	see reference for details	26
1-pentadecanol	pentadecanol	AFC000354	AFC000354	12397	F	NR	0.001	NR	ug/kg	several mini-melons sampled	148
1-pentadecene	pentadec-1-ene	AFC000398	AFC000398	25913	J	NR	NR	NR	NR		35
1-pentadecene	pentadec-1-ene	AFC000398	AFC000398	25913	U						3
1-pentan-3-ol		AFC000339	AFC000339	11428	F,H	0	2.5	NR	percent VOC		171
1-pentan-3-one	3-pentanone	AFC000273	AFC000273	7288	U						33
1-pentanol	pentan-1-ol;amyl alcohol	AFC000255	AFC000255	6276	F	0.019	11.73	NR	ug/kg	cv Proteo ungrafted watermelon	173
1-pentanol	pentan-1-ol;amyl alcohol	AFC000255	AFC000255	6276	F	26.9	26.9	NR	ng/g	C. vulgaris Schrad	163
1-pentanol	pentan-1-ol;amyl alcohol	AFC000255	AFC000255	6276	F	0	1.1	NR	percent VOC		171
1-pentanol	pentan-1-ol;amyl alcohol	AFC000255	AFC000255	6276	F	NR	NR	NR	NR		111
1-pentanol	pentan-1-ol;amyl alcohol	AFC000255	AFC000255	6276	F	0.01	0.019	NR	ug/kg	several mini-melons sampled	148
1-pentanol	pentan-1-ol;amyl alcohol	AFC000255	AFC000255	6276	F	NR	NR	NR	NR		152
1-pentanol	pentan-1-ol;amyl alcohol	AFC000255	AFC000255	6276	H	NR	NR	NR	NR		190
1-pentanol	pentan-1-ol;amyl alcohol	AFC000255	AFC000255	6276	J	NR	NR	NR	NR		159
1-pentanol	pentan-1-ol;amyl alcohol	AFC000255	AFC000255	6276	J	NR	NR	NR	NR		35
1-pentanol	pentan-1-ol;amyl alcohol	AFC000255	AFC000255	6276	U						3
1-pentanol	pentan-1-ol;amyl alcohol	AFC000255	AFC000255	6276	F	25	25	NR	mg/100 g	cv F1 Oneida; grafts onto citron rootstocks were performed, see ref for details	187
1-penten-3-ol	pentene-3-ol;pent-1-en-3-ol	AFC000347	AFC000347	12020	F	0.002	0.002	NR	ug/kg		159
1-penten-3-ol	pentene-3-ol;pent-1-en-3-ol	AFC000347	AFC000347	12020	F	0.001	0.003	NR	ug/kg	several mini-melons sampled	148
1-penten-3-ol	pentene-3-ol;pent-1-en-3-ol	AFC000347	AFC000347	12020	F	NR	NR	NR	NR		152
1-penten-3-ol	pentene-3-ol;pent-1-en-3-ol	AFC000347	AFC000347	12020	J	NR	NR	NR	NR		146
1-penten-3-ol	pentene-3-ol;pent-1-en-3-ol	AFC000347	AFC000347	12020	J	NR	NR	NR	NR		35
1-penten-3-ol	pentene-3-ol;pent-1-en-3-ol	AFC000347	AFC000347	12020	U						3
1-propanethiol S-oxide	propanethiol S-oxide	AFC001612	AFC001612	no entry found	U						33
1-propenylsulfenate		AFC001252	AFC001252	20371837	U						33
1-undecanol	undecanol	AFC000304	AFC000304	8184	F	0.001	0.003	NR	ug/kg	several mini-melons sampled	148
1,10-undecadiene		AFC001944	AFC001944	139543	J	3.6	3.6	0.32	ug/L	cv Jingza 18; data for 11 other cultivars are presented, see ref for details	126
1,2-benzoquinone	o-quinone	AFC000338	AFC000338	11421	U						33
1,2-dihydroxy-5-(methylthio)pent-1-en-3-one		AFC001066	AFC001066	5462190	U						33
1,3-bisphospho-D-glycerate	3-phospho-D-glyceroyl dihydrogen phosphate	AFC000644	AFC000644	439191	U						33
1,3-diaminopropane	propane-1,3-diamine;trimethylenediamine	AFC000066	AFC000066	428	U						33
1,3-dimethyluric acid	1,3-dimethylurate;oxytheophylline	AFC001945	AFC001945	70346	F	0.064	0.064	NR	mmol/L	cv Zaojia 8424 at a normal potassium level; grafts on other rootstocks and at low potassium are presented, see ref for details	116
1,4-dihydroxy-2-naphthoate		AFC000091	AFC000091	671	U						33
1,4-dihydroxy-2-naphthoyl-CoA		AFC001375	AFC001375	44140569	U						33
1,5-dihydrocoenzyme F420(4-)	reduced coenzyme gamma-F420-2	AFC001749	AFC001749	46878391	U						33
1,5-dihydroriboflavin	reduced riboflavin	AFC001218	AFC001218	14080393	U						33
1,5-dihydroriboflavin 5'-(dihydrogen phosphate)	FMNH2	AFC000772	AFC000772	445395	U						33
10-formyl-tetrahydrofolate	10-formyltetrahydropteroylglutamic acid	AFC001588	AFC001588	135450591	U						33
10-octadecanoic acid methyl ester	methyl octadec-10-enoate	AFC000397	AFC000397	25642	P,R	2085	2085	NR	Kovats (iu)		149
11,14-eicosadienoic acid		AFC000969	AFC000969	5282805	S	NR	NR	NR	NR		131
12-oxo-(E)-10-dodecenoic acid		AFC000995	AFC000995	5312889	V	NR	NR	NR	NR		141
12-oxo-(Z)-9-dodecenoic acid		AFC001138	AFC001138	9548789	V	NR	NR	NR	NR		141
12-oxo-cis-10,15-phytodienoate		AFC001391	AFC001391	45266620	U						33
12-oxo-phytodienoic acid		AFC000877	AFC000877	5280411	G	NR	NR	NR	NR	see reference for details on strains Calhoun Grey, Charleston Gray, PI-296341 and Sugar Baby	125
12-oxo-phytodienoic acid		AFC000877	AFC000877	5280411	V	NR	NR	NR	NR		141
12,13-dihydroxyoctadeca-9-enoate	12,13-DiHOME	AFC001440	AFC001440	52940209	U						33
12,13-dihydroxyoctadeca-9,15-dienoate	12,13-DiHODE	AFC001433	AFC001433	52940081	U						33
12,13-epoxyoctadeca-9,15-dienoate		AFC001613	AFC001613	no entry found	U						33
12,13,17-trihydroxyoctadeca-9-enoate		AFC001437	AFC001437	52940143	U						33
12,13(S)-epoxylinolenate		AFC001253	AFC001253	5280712;20843327	U						33
13-[O(2')-beta-D-glucopyranosyl-beta-D-glucopyranosyloxy]docosanoate O(6'')-acetate		AFC001361	AFC001361	25246114	U						33
13-cis-lycopene		AFC001947	AFC001947	6440310	F	33.49	33.49	8.14	ug/g dw	cv Lizhiguan; data for 11 other cultivars are presented, see ref for details	126
13-sophorosyloxydocosanoate 6',6''-diacetate	hydroxydocosanoic acid sophoroside	AFC000856	AFC000856	3082161	U						33
13(S)-hydroperoxy-9(Z),11(E),15(Z)-octadecatrienoate	alpha-linolenic acid 13-hydroperoxide	AFC001337	AFC001337	25244639	U						33
131-hydroxy-magnesium-protoporphyrin IX 13-monomethyl ester		AFC001379	AFC001379	44229246	U						33
131-oxo-magnesium-protoporphyrin IX 13-monomethyl ester		AFC001377	AFC001377	44229101	U						33
15-cis-phytoene		AFC001144	AFC000908	9963391	U						33
15,16-dihydroxyoctadeca-9,12-dienoate	15,16-DiHODE	AFC001439	AFC001439	52940176	U						33
15,16-epoxyoctadeca-9,12-dienoate	15(16)-EpODE	AFC001436	AFC001436	52940137	U						33
15,9'-di-cis-phytofluene		AFC001431	AFC001095	51351778	U						33
16,25,2’,3’,4’,6’-hexa-O-acetyl-2-O-beta-D-glucopyranosyl-cucurbitacin I		AFC001777	AFC001777	no entry found	F	NR	NR	NR	NR		194
18-hydroxyoleate		AFC001476	AFC001476	86289578	U						33
18-oxo-oleate		AFC001488	AFC001488	90657874	U						33
1D-myo-inositol (1)-monophosphate		AFC000989	AFC000989	5288642	U						33
1D-myo-inositol (3)-monophosphate		AFC000990	AFC000990	5288700	U						33
1D-myo-inositol (4)-monophosphate		AFC001301	AFC000989	25200523	U						33
1D-myo-inositol 1,2,3,4,5,6-hexakisphosphate		AFC001259	AFC001259	21584050	U						33
1D-myo-inositol 5-phosphate	1D-myo-inositol (2) monophosphate	AFC000576	AFC000576	160886	U						33
2-(2-butynyl)cyclohexanone		AFC000802	AFC000802	584585	P,R	1267	1267	NR	Kovats (iu)		149
2-(2-carboxy-4-methylthiazol-5-yl)ethyl phosphate		AFC001418	AFC001418	46942369	U						33
2-(2-pentenyl)furan	trans-2-(2-pentenyl)furan	AFC001034	AFC001034	5369957	F	NR	NR	NR	NR		111
2-(2-pentenyl)furan	trans-2-(2-pentenyl)furan	AFC001034	AFC001034	5369957	J	4.39	4.39	3.07	ug/L	cv Texiaofeng; data for 11 other cultivars are presented, see ref for details	126
2-(4-hydroxyphenyl)ethanol	tyrosol	AFC000329	AFC000329	10393	U						33
2-(alpha-D-galactosyl)-sn-glycerol 3-phosphate		AFC001241	AFC001241	16048616	U						33
2-(alpha-hydroxyethyl)thiamine diphosphate	2-(1-hydroxyethyl)thiamine diphosphate	AFC000718	AFC000718	440568	U						33
2-(cis-2-nonenyl-oxy)-5-pentyl-tetrahydrofuran		AFC001614	AFC001614	no entry found	J	NR	NR	NR	NR		35
2-(cis-cis-3,6-nonadienyl-oxy)-5-pentyl-tetrahydrofuran		AFC001615	AFC001615	no entry found	J	NR	NR	NR	NR		35
2-(Dimethylazaniumyl)ethyl phosphate	N-dimethylethanolamine phosphate;dimethylethanolamine phosphate;P-DME	AFC001314	AFC001314	25201906	U						33
2-(formylamino)benzoic acid	formylanthranilic acid	AFC000502	AFC000502	101399	H	NR	NR	NR	NR		178
2-(on-cis-3-enyl-oxy)-5-pentyl-tetrahydrofuran		AFC001616	AFC001616	no entry found	J	NR	NR	NR	NR		35
2-[(1R,6S)-1,6-dihydroxycyclohexa-2,4-dien-1-yl]acetyl-CoA		AFC001491	AFC001491	90658457	U						33
2-aceto-2-hydroxybutanoate		AFC000004	AFC000004	21	U						33
2-amino-3-(3-methylimidazol-4-yl)propanoic acid	3-methylhistidine	AFC001860	AFC001860	7017993	F	NR	NR	NR	NR	see reference for details	26
2-amino-5-formylamino-6-(5-phospho-D-ribosylamino)pyrimidin-4(3H)-one		AFC001594	AFC001594	135911923	U						33
2-aminoadipic acid	2-aminohexanedioic acid;L-homoglutamic acid	AFC000069	AFC000069	469	F	NR	NR	NR	NR	see reference for details	26
2-aminoadipic acid	2-aminohexanedioic acid;L-homoglutamic acid	AFC000069	AFC000069	469	H	NR	NR	NR	NR		178
2-aminoethyl dihydrogen phosphate	phosphoryl-ethanolamine;phosphoethanolamine	AFC000157	AFC000157	1015	U						33
2-aminoisobutyric acid	2-methylalanine	AFC001840	AFC001840	6119	F	NR	NR	NR	NR	see reference for details	26
2-aminooctadec-4-ene-1,3-diol	sphingosine;erythro-dl-sphingosine;(-)-D-erythro-sphingosine	AFC000869	AFC000869	5280335	U						33
2-benzyl-oxy-5-pentyl-tetrahydrofuran		AFC001617	AFC001617	no entry found	J	NR	NR	NR	NR		35
2-C-methyl-D-erythritol-2,4-cyclodiphosphate		AFC001263	AFC001263	21605869	U						33
2-C-methyl-D-erythritol-4-phosphate	(2R,3S)-2,3,4-trihydroxy-3-methylbutyl phosphate	AFC001264	AFC001264	21608483	U						33
2-carboxy-L-threo-pentonate		AFC001484	AFC001484	146170827	U						33
2-carboxy-L-xylonolactone		AFC001490	AFC001490	90658445	U						33
2-carboxymethyl-3-hydroxyphenylpropionyl-CoA		AFC001443	AFC001443	53481380	U						33
2-cis-abscisate		AFC001294	AFC001294	24798705	U						33
2-decenal	dec-trans-2-enal	AFC000976	AFC000976	5283345	F	NR	NR	NR	NR		35
2-dehydropantoate		AFC000005	AFC000005	38	U						33
2-ethoxy5-pentyl-tetrahydrofuran		AFC001618	AFC001618	no entry found	J	NR	NR	NR	NR		35
2-ethyl hexenal		AFC000360	AFC000360	12582	F	6.81	6.81	NR	ug/kg	cv Proteo ungrafted watermelon	173
2-ethyl-3-methylbutanoate	ethyl 3-methyl butanoate	AFC001265	AFC001265	21653378	F	5.49	5.49	NR	ug/kg	cv Proteo ungrafted watermelon	173
2-ethylfuran		AFC000377	AFC000377	18554	F	NR	NR	NR	NR		111
2-ethylfuran		AFC000377	AFC000377	18554	F,J	NR	NR	NR	NR		159
2-ethylhexanol	2-ethyl-1-hexanol	AFC000286	AFC000286	7720	F	0.004	44.96	NR	ug/kg	cv Proteo ungrafted watermelon	173
2-ethylhexanol	2-ethyl-1-hexanol	AFC000286	AFC000286	7720	F	0.004	0.011	NR	ug/kg	several mini-melons sampled	148
2-ethylhexanol	2-ethyl-1-hexanol	AFC000286	AFC000286	7720	J	NR	NR	NR	NR		159
2-ethylhexanol	2-ethyl-1-hexanol	AFC000286	AFC000286	7720	J	201.82	201.82	57.18	ug/L	cv Lizhiguan; data for 11 other cultivars are presented, see ref for details	126
2-heptanone	heptan-2-one;butylacetone	AFC000296	AFC000296	8051	J	NR	NR	NR	NR		35
2-heptanone	heptan-2-one;butylacetone	AFC000296	AFC000296	8051	U						3
2-heptenal	(E)-2-heptenal;hept-trans-2-en-1-al;hept-trans-2-enal	AFC000970	AFC000970	5283316	F	4.4	4.4	NR	ng/g	C. vulgaris Schrad	163
2-heptenal	(E)-2-heptenal;hept-trans-2-en-1-al;hept-trans-2-enal	AFC000970	AFC000970	5283316	F	0.001	0.003	NR	ug/kg	several mini-melons sampled	148
2-heptenal	(E)-2-heptenal;hept-trans-2-en-1-al;hept-trans-2-enal	AFC000970	AFC000970	5283316	F	NR	NR	NR	NR		152
2-heptenal	(E)-2-heptenal;hept-trans-2-en-1-al;hept-trans-2-enal	AFC000970	AFC000970	5283316	F,J	NR	NR	NR	NR		35
2-heptenal	(E)-2-heptenal;hept-trans-2-en-1-al;hept-trans-2-enal	AFC000970	AFC000970	5283316	H	NR	NR	NR	NR		190
2-heptenal	(E)-2-heptenal;hept-trans-2-en-1-al;hept-trans-2-enal	AFC000970	AFC000970	5283316	J	NR	NR	NR	NR		159
2-heptenal	(E)-2-heptenal;hept-trans-2-en-1-al;hept-trans-2-enal	AFC000970	AFC000970	5283316	J	NR	NR	NR	NR		146
2-heptenal	(E)-2-heptenal;hept-trans-2-en-1-al;hept-trans-2-enal	AFC000970	AFC000970	5283316	F	4.7	4.7	NR	mg/100 g	cv F1 Oneida; grafts onto citron rootstocks were performed, see ref for details	187
2-heptenal	(E)-2-heptenal;hept-trans-2-en-1-al;hept-trans-2-enal	AFC000970	AFC000970	5283316	F	22	22	NR	ng/g	cv Royal Armada fresh fruit; other samples include stored fruit, see ref for details	117
2-hexen-1-ol	trans-2-hexenol	AFC001000	AFC001000	5318042	U						33
2-hexen-4-one	trans-4-hexen-3-one	AFC001028	AFC001028	5365811	U						33
2-hexenal	trans-2-hexenal;2-hexenal;(E)-hex-2-enal;(E)-2-hexenal;trans-hex-2-enal;2-trans-hexenal;beta-propyl acrolein;hexylenic aldehyde;hex-trans-2-en-1-al	AFC000928	AFC000928	5281168	F	2578	2578	93	ug/kg	variety Rugby, see reference for values in unripe and overripe fruit	142
2-hexenal	trans-2-hexenal;2-hexenal;(E)-hex-2-enal;(E)-2-hexenal;trans-hex-2-enal;2-trans-hexenal;beta-propyl acrolein;hexylenic aldehyde;hex-trans-2-en-1-al	AFC000928	AFC000928	5281168	F	0.002	14.13	NR	ug/kg	cv Proteo ungrafted watermelon	173
2-hexenal	trans-2-hexenal;2-hexenal;(E)-hex-2-enal;(E)-2-hexenal;trans-hex-2-enal;2-trans-hexenal;beta-propyl acrolein;hexylenic aldehyde;hex-trans-2-en-1-al	AFC000928	AFC000928	5281168	F	0.4	2.4	NR	percent VOC		171
2-hexenal	trans-2-hexenal;2-hexenal;(E)-hex-2-enal;(E)-2-hexenal;trans-hex-2-enal;2-trans-hexenal;beta-propyl acrolein;hexylenic aldehyde;hex-trans-2-en-1-al	AFC000928	AFC000928	5281168	F	NR	NR	NR	NR		180
2-hexenal	trans-2-hexenal;2-hexenal;(E)-hex-2-enal;(E)-2-hexenal;trans-hex-2-enal;2-trans-hexenal;beta-propyl acrolein;hexylenic aldehyde;hex-trans-2-en-1-al	AFC000928	AFC000928	5281168	F	NR	0.016	NR	ug/kg	several mini-melons sampled	148
2-hexenal	trans-2-hexenal;2-hexenal;(E)-hex-2-enal;(E)-2-hexenal;trans-hex-2-enal;2-trans-hexenal;beta-propyl acrolein;hexylenic aldehyde;hex-trans-2-en-1-al	AFC000928	AFC000928	5281168	F,J	NR	NR	NR	NR		35
2-hexenal	trans-2-hexenal;2-hexenal;(E)-hex-2-enal;(E)-2-hexenal;trans-hex-2-enal;2-trans-hexenal;beta-propyl acrolein;hexylenic aldehyde;hex-trans-2-en-1-al	AFC000928	AFC000928	5281168	J	NR	NR	NR	NR		159
2-hexenal	trans-2-hexenal;2-hexenal;(E)-hex-2-enal;(E)-2-hexenal;trans-hex-2-enal;2-trans-hexenal;beta-propyl acrolein;hexylenic aldehyde;hex-trans-2-en-1-al	AFC000928	AFC000928	5281168	J	60.27	60.27	NR	ug/L		146
2-hexenal	trans-2-hexenal;2-hexenal;(E)-hex-2-enal;(E)-2-hexenal;trans-hex-2-enal;2-trans-hexenal;beta-propyl acrolein;hexylenic aldehyde;hex-trans-2-en-1-al	AFC000928	AFC000928	5281168	U						33
2-hexenal	trans-2-hexenal;2-hexenal;(E)-hex-2-enal;(E)-2-hexenal;trans-hex-2-enal;2-trans-hexenal;beta-propyl acrolein;hexylenic aldehyde;hex-trans-2-en-1-al	AFC000928	AFC000928	5281168	V	NR	NR	NR	NR		141
2-hexenal	trans-2-hexenal;2-hexenal;(E)-hex-2-enal;(E)-2-hexenal;trans-hex-2-enal;2-trans-hexenal;beta-propyl acrolein;hexylenic aldehyde;hex-trans-2-en-1-al	AFC000928	AFC000928	5281168	F	13	13	NR	ng/g	cv Royal Armada fresh fruit; other samples include stored fruit, see ref for details	117
2-hexyl-oxy-5-pentyl-tetrahydrofuran		AFC001619	AFC001619	no entry found	J	NR	NR	NR	NR		35
2-hydroxy-5-(methylthio)-3-oxopent-1-enyl phosphate		AFC001065	AFC001065	5462148	U						33
2-hydroxy-5-pentyl-tetrahydrofuran		AFC001620	AFC001620	no entry found	J	NR	NR	NR	NR		35
2-hydroxyformononetin		AFC000896	AFC000896	5280551	U						33
2-hydroxyisocaproic acid	2-hydroxy-4-methylvaleric acid;leucic acid	AFC000486	AFC000466	92779	H	NR	NR	NR	NR		178
2-hydroxyphytanoyl-CoA		AFC001183	AFC001183	441263	U						33
2-isobutylthiazole		AFC000423	AFC000423	62725	F	NR	NR	NR	NR		180
2-isopropylmaleate		AFC000889	AFC000889	5280533	U						33
2-keto-3-methyl-valerate	(S)-3-methyl-2-oxovalerate;(S)-3-methyl-2-oxopentanoate;2-keto-isoleucine;alpha-keto-methylvalerate	AFC001112	AFC001112	6857401	U						33
2-maleylacetate	4-oxohex-2-enedioate	AFC000886	AFC000886	5280500	U						33
2-methoxy-6-(all-trans-nonaprenyl)phenol		AFC001036	AFC001036	5372355	U						33
2-methoxy-6-all trans-nonaprenyl-2-methoxy-1,4-benzoquinol		AFC001430	AFC001430	no entry found	U						33
2-methoxy-6-all trans-octaprenyl-2-methoxy-1,4-benzoquinol		AFC001621	AFC001621	no entry found	U						33
2-methoxycinnamic acid		AFC001863	AFC001863	734154	F	NR	NR	NR	NR	see reference for details	26
2-methyl-1-butanol	2-methylbutan-1-ol	AFC000313	AFC000313	8723	F	0.022	148.74	NR	ug/kg	cv Proteo ungrafted watermelon	173
2-methyl-1-butanol	2-methylbutan-1-ol	AFC000313	AFC000313	8723	F	NR	NR	NR	NR		111
2-methyl-1-butanol	2-methylbutan-1-ol	AFC000313	AFC000313	8723	F	0.022	0.092	NR	ug/kg	several mini-melons sampled	148
2-methyl-6-phytylquinol	2-methyl-6-phytyl-1,4-benzoquinol	AFC001470	AFC001470	71768135	U						33
2-methylbutyl-2-methylbutanoate		AFC000372	AFC000372	17129	F	1.37	1.37	NR	ug/kg	cv Proteo ungrafted watermelon	173
2-methylbutyraldehyde	2-methylbutanal	AFC000272	AFC000272	7284	F	NR	NR	NR	NR		111
2-methylbutyraldehyde	2-methylbutanal	AFC000272	AFC000272	7284	F	0.001	0.002	NR	ug/kg	several mini-melons sampled	148
2-methylbutyraldehyde	2-methylbutanal	AFC000272	AFC000272	7284	U						33
2-methylglutaric acid	methylglutaric acid;2-methyl-pentanedioic acid	AFC000349	AFC000349	12046	H	NR	NR	NR	NR		178
2-methylsuccinic acid		AFC000328	AFC000328	10349	H	NR	NR	NR	NR		178
2-methylthio-N-6-isopentyl adenosine-37 tRNA		AFC001622	AFC001622	no entry found	U						33
2-nonanone	nonan-2-one;methyl heptyl ketone	AFC000362	AFC000362	13187	J	NR	NR	NR	NR		35
2-nonanone	nonan-2-one;methyl heptyl ketone	AFC000362	AFC000362	13187	U						3
2-nonenal	(E)-2-nonenal;trans-2-nonenal;3-hexyl-2-propenal;non-trans-2-en-al	AFC000973	AFC000973	5283335	F	0.001	7.92	NR	ug/kg		159
2-nonenal	(E)-2-nonenal;trans-2-nonenal;3-hexyl-2-propenal;non-trans-2-en-al	AFC000973	AFC000973	5283335	F	0.001	7.92	NR	ug/kg	cv Proteo ungrafted watermelon	173
2-nonenal	(E)-2-nonenal;trans-2-nonenal;3-hexyl-2-propenal;non-trans-2-en-al	AFC000973	AFC000973	5283335	F	36.1	36.1	NR	ng/g	C. vulgaris Schrad	163
2-nonenal	(E)-2-nonenal;trans-2-nonenal;3-hexyl-2-propenal;non-trans-2-en-al	AFC000973	AFC000973	5283335	F	NR	NR	NR	NR		180
2-nonenal	(E)-2-nonenal;trans-2-nonenal;3-hexyl-2-propenal;non-trans-2-en-al	AFC000973	AFC000973	5283335	F	0.001	0.004	NR	ug/kg	several mini-melons sampled	148
2-nonenal	(E)-2-nonenal;trans-2-nonenal;3-hexyl-2-propenal;non-trans-2-en-al	AFC000973	AFC000973	5283335	F	NR	NR	NR	NR		35
2-nonenal	(E)-2-nonenal;trans-2-nonenal;3-hexyl-2-propenal;non-trans-2-en-al	AFC000973	AFC000973	5283335	F,H	0.6	2.1	NR	percent VOC		171
2-nonenal	(E)-2-nonenal;trans-2-nonenal;3-hexyl-2-propenal;non-trans-2-en-al	AFC000973	AFC000973	5283335	H	NR	NR	NR	NR		190
2-nonenal	(E)-2-nonenal;trans-2-nonenal;3-hexyl-2-propenal;non-trans-2-en-al	AFC000973	AFC000973	5283335	J	1293.08	1293.08	NR	ug/L		146
2-nonenal	(E)-2-nonenal;trans-2-nonenal;3-hexyl-2-propenal;non-trans-2-en-al	AFC000973	AFC000973	5283335	F	501.6	501.6	NR	mg/100 g	cv F1 Oneida; grafts onto citron rootstocks were performed, see ref for details	187
2-nonenal	(E)-2-nonenal;trans-2-nonenal;3-hexyl-2-propenal;non-trans-2-en-al	AFC000973	AFC000973	5283335	J	76.74	76.74	10.21	ug/L	cv Lizhiguan; data for 11 other cultivars are presented, see ref for details	126
2-nonenal	(E)-2-nonenal;trans-2-nonenal;3-hexyl-2-propenal;non-trans-2-en-al	AFC000973	AFC000973	5283335	F	1466	1466	NR	ng/g	cv Royal Armada fresh fruit; other samples include stored fruit, see ref for details	117
2-nonyl-oxy-5-pentyl-tetrahydrofuran		AFC001623	AFC001623	no entry found	J	NR	NR	NR	NR		35
2-O-(6-phospho-alpha-D-mannosyl)-D-glycerate		AFC001412	AFC001412	46906104	U						33
2-octanone	octanone	AFC000299	AFC000299	8093	F	NR	0.002	NR	ug/kg	several mini-melons sampled	148
2-octenal	(E)-2-octenal;oct-trans-2-en-1-al	AFC000972	AFC000972	5283324	F	892	892	220	ug/kg	variety Rugby, see reference for values in unripe and overripe fruit	142
2-octenal	(E)-2-octenal;oct-trans-2-en-1-al	AFC000972	AFC000972	5283324	F	1.8	1.8	NR	ng/g	C. vulgaris Schrad	163
2-octenal	(E)-2-octenal;oct-trans-2-en-1-al	AFC000972	AFC000972	5283324	F	0.009	0.033	NR	ug/kg	several mini-melons sampled	148
2-octenal	(E)-2-octenal;oct-trans-2-en-1-al	AFC000972	AFC000972	5283324	F	NR	NR	NR	NR		152
2-octenal	(E)-2-octenal;oct-trans-2-en-1-al	AFC000972	AFC000972	5283324	F,J	NR	NR	NR	NR		35
2-octenal	(E)-2-octenal;oct-trans-2-en-1-al	AFC000972	AFC000972	5283324	J	NR	NR	NR	NR		159
2-octenal	(E)-2-octenal;oct-trans-2-en-1-al	AFC000972	AFC000972	5283324	J	17.57	17.57	NR	ug/L		146
2-octenal	(E)-2-octenal;oct-trans-2-en-1-al	AFC000972	AFC000972	5283324	F	7.2	7.2	NR	mg/100 g	cv F1 Oneida; grafts onto citron rootstocks were performed, see ref for details	187
2-octenal	(E)-2-octenal;oct-trans-2-en-1-al	AFC000972	AFC000972	5283324	F	54	54	NR	ng/g	cv Royal Armada fresh fruit; other samples include stored fruit, see ref for details	117
2-octyl-oxy-5-pentyl-tetrahydrofuran		AFC001624	AFC001624	no entry found	J	NR	NR	NR	NR		35
2-oxo-3-phenylpropanoate	keto-phenylpyruvate;3-phenylpyruvate	AFC000865	AFC000865	4592697	U						33
2-oxo-4-methylthiobutanoate	4-(methylsulfanyl)-2-oxobutanoic acid;4-methylthio-2-oxobutanoic acid;2-keto-4-methylthiobutyric acid	AFC000070	AFC000070	473	U						33
2-oxobutanoate	2-ketobutyrate	AFC000859	AFC000859	3593277	U						33
2-oxoglutaric acid	2-oxoglutarate;alpha-ketoglutaric acid	AFC000007	AFC000007	51	H	NR	NR	NR	NR		178
2-oxoglutaric acid	2-oxoglutarate;alpha-ketoglutaric acid	AFC000007	AFC000007	51	T	NR	NR	NR	NR	several cultivars sampled	170
2-oxoglutaric acid	2-oxoglutarate;alpha-ketoglutaric acid	AFC000007	AFC000007	51	U						33
2-oxoisovalerate	3-methyl-2-oxobutanoic acid	AFC000006	AFC000006	49	U						33
2-penten-1-ol	trans-2-pentenol	AFC001025	AFC001025	5364920	U						33
2-pentenal	trans-2-pentenal;pent-trans-2-en-1-al;(E)-2-pentenal	AFC001023	AFC001023	5364752	F	0.006	0.011	NR	ug/kg	several mini-melons sampled	148
2-pentenal	trans-2-pentenal;pent-trans-2-en-1-al;(E)-2-pentenal	AFC001023	AFC001023	5364752	F	NR	NR	NR	NR		152
2-pentenal	trans-2-pentenal;pent-trans-2-en-1-al;(E)-2-pentenal	AFC001023	AFC001023	5364752	H	NR	NR	NR	NR		190
2-pentenal	trans-2-pentenal;pent-trans-2-en-1-al;(E)-2-pentenal	AFC001023	AFC001023	5364752	J	NR	NR	NR	NR		159
2-pentenal	trans-2-pentenal;pent-trans-2-en-1-al;(E)-2-pentenal	AFC001023	AFC001023	5364752	J	NR	NR	NR	NR		146
2-pentenal	trans-2-pentenal;pent-trans-2-en-1-al;(E)-2-pentenal	AFC001023	AFC001023	5364752	J	NR	NR	NR	NR		35
2-pentenal	trans-2-pentenal;pent-trans-2-en-1-al;(E)-2-pentenal	AFC001023	AFC001023	5364752	U						33
2-pentyl-oxy-5-pentyl-tetrahydrofuran		AFC001625	AFC001625	no entry found	J	NR	NR	NR	NR		35
2-pentylfuran	2-pentyl-furan;amylfuran	AFC000381	AFC000381	19602	F	0	1.2	NR	percent VOC		171
2-pentylfuran	2-pentyl-furan;amylfuran	AFC000381	AFC000381	19602	F	NR	NR	NR	NR		111
2-pentylfuran	2-pentyl-furan;amylfuran	AFC000381	AFC000381	19602	F	0.006	0.013	NR	ug/kg	several mini-melons sampled	148
2-pentylfuran	2-pentyl-furan;amylfuran	AFC000381	AFC000381	19602	J	NR	NR	NR	NR		159
2-pentylfuran	2-pentyl-furan;amylfuran	AFC000381	AFC000381	19602	J	NR	NR	NR	NR		146
2-pentylfuran	2-pentyl-furan;amylfuran	AFC000381	AFC000381	19602	J	NR	NR	NR	NR		35
2-pentylfuran	2-pentyl-furan;amylfuran	AFC000381	AFC000381	19602	U						3
2-pentylfuran	2-pentyl-furan;amylfuran	AFC000381	AFC000381	19602	J	37.25	37.25	2.45	ug/L	cv Lizhiguan; data for 11 other cultivars are presented, see ref for details	126
2-pentylfuran	2-pentyl-furan;amylfuran	AFC000381	AFC000381	19602	F	159	159	NR	ng/g	cv Royal Armada fresh fruit; other samples include stored fruit, see ref for details	117
2-phenethyl-oxy-5-pentyl-tetrahydrofuran		AFC001626	AFC001626	no entry found	J	NR	NR	NR	NR		35
2-phenylethanol	phenethyl alcohol	AFC000235	AFC000235	6054	F	11.98	11.98	NR	ug/kg	cv Proteo ungrafted watermelon	173
2-phenylethanol	phenethyl alcohol	AFC000235	AFC000235	6054	F	NR	NR	NR	NR		152
2-phenylethanol	phenethyl alcohol	AFC000235	AFC000235	6054	J	NR	NR	NR	NR		35
2-phenylethanol	phenethyl alcohol	AFC000235	AFC000235	6054	U						3
2-phenylethanol	phenethyl alcohol	AFC000235	AFC000235	6054	F	1.1	1.1	NR	mg/100 g	cv F1 Oneida; grafts onto citron rootstocks were performed, see ref for details	187
2-phospho-4-(cytidine 5'-diphospho)-2-C-methyl-D-erythritol	4-CDP-2-C-methyl-D-erythritol 2-phosphate	AFC000744	AFC000744	443200	U						33
2-phospho-D-glycerate		AFC000658	AFC000658	439278	U						33
2-phosphoglycolate		AFC000076	AFC000076	529	U						33
2-succinyl-5-enolpyruvyl-6-hydroxy-3-cyclohexene-1-carboxylate		AFC001295	AFC001295	24883454	U						33
2-succinylbenzoate	O-succinylbenzoate	AFC000141	AFC000141	955	U						33
2-trans-dodecenoyl-CoA		AFC001178	AFC001178	11966110	U						33
2-trans-hexadecenal		AFC000893	AFC000893	5280541	U						33
2-trans,-6-trans-farnesyl monophosphate		AFC001417	AFC001417	46926298	U						33
2-trans,5-cis-tetradecadienoyl-CoA		AFC001329	AFC001329	25244134	U						33
2,3-butanedione	diacetyl	AFC000087	AFC000087	650	F	NR	NR	NR	NR		111
2,3-butanedione	diacetyl	AFC000087	AFC000087	650	U						33
2,3-dihydroflavone	flavanone;4-flavanone	AFC001936	AFC001936	10251	F	NR	NR	NR	NR	see reference for details	26
2,3-dihydroxy-2,3-dihydrobenzoate		AFC001277	AFC001277	23615184	U						33
2,3-dihydroxy-3-methylvalerate		AFC000002	AFC000002	8	U						33
2,3-dihydroxybenzoylserine		AFC000561	AFC000561	151483	U						33
2,3-dimethyl-6-phytylhydroquinone	(R,R)-2,3-Dimethyl-6-phytylhydroquinone;2,3-dimethyl-6-phytyl-1,4-benzoquinol	AFC001469	AFC001469	71768102	U						33
2,3-dioxo-L-gulonate	2,3-diketogulonate	AFC001257	AFC001257	440390;21145097	U						33
2,3-diphosphoglycerate		AFC000008	AFC000008	61	U						33
2,3-epoxygerianial	3-methyl-3-(4-methyl-3-pentenyl)-2-oxiranecarbaldehyde	AFC000800	AFC000800	534994	F	NR	NR	NR	NR		180
2,3-epoxygerianial	3-methyl-3-(4-methyl-3-pentenyl)-2-oxiranecarbaldehyde	AFC000800	AFC000800	534994	F	0	32	2	ng/g		120
2,3-oxidosqualene		AFC001031	AFC001031	5366020	L	NR	NR	NR	NR		136
2,3-oxidosqualene		AFC001031	AFC001031	5366020	U					cell culture	123
2,3-pentanedione		AFC000344	AFC000344	11747	F,J	NR	NR	NR	NR		159
2,3,6-trichlorohydroquinone		AFC000446	AFC000446	69103	U						33
2,4-dinitrophenyl-S-glutathione		AFC001366	AFC001366	25322932	U						33
2,4-heptadienal	(E,E)-2,4-heptadienal;hepta-trans-2-trans-4-dien-1-al	AFC000971	AFC000971	5283321	F	1	1	NR	ng/g	C. vulgaris Schrad	163
2,4-heptadienal	(E,E)-2,4-heptadienal;hepta-trans-2-trans-4-dien-1-al	AFC000971	AFC000971	5283321	F	NR	0.001	NR	ug/kg	several mini-melons sampled	148
2,4-heptadienal	(E,E)-2,4-heptadienal;hepta-trans-2-trans-4-dien-1-al	AFC000971	AFC000971	5283321	J	NR	NR	NR	NR		159
2,4-heptadienal	(E,E)-2,4-heptadienal;hepta-trans-2-trans-4-dien-1-al	AFC000971	AFC000971	5283321	J	NR	NR	NR	NR		146
2,4-heptadienal	(E,E)-2,4-heptadienal;hepta-trans-2-trans-4-dien-1-al	AFC000971	AFC000971	5283321	J	NR	NR	NR	NR		35
2,4-heptadienal	(E,E)-2,4-heptadienal;hepta-trans-2-trans-4-dien-1-al	AFC000971	AFC000971	5283321	F	2.5	2.5	NR	mg/100 g	cv F1 Oneida; grafts onto citron rootstocks were performed, see ref for details	187
2,4-hexadienal		AFC000807	AFC000807	637564	F,J	NR	NR	NR	NR		159
2,5-diamino-6-(5-phospho-D-ribosylamino)pyrimidin-4(3H)-one	2,5-diamino-6-hydroxy-4-(5-phosphoribosylamino)pyrimidine	AFC001558	AFC001558	135398601	U						33
2,6-diaminopimelic acid	2,6-diaminoheptanedioic acid;DL-alpha,epsilon-diaminopimelic acid	AFC001870	AFC000842	865	F	NR	NR	NR	NR	see reference for details	26
2,6-dimethylhept-5-enal	2,6-dimethyl-5-heptenal	AFC000418	AFC000418	61016	F	0	18	0	ng/g		120
2,7-dimethyl-1-octanol		AFC000400	AFC000400	27154	F	NR	NR	NR	NR		111
2'-deoxyadenosine-5'-diphosphate	dADP	AFC000610	AFC000610	188966	U						33
2'-deoxyadenosine-5'-monophosphate	dAMP	AFC001901	AFC001901	12599	F	NR	NR	NR	NR	see reference for details	26
2'-deoxyadenosine-5'-triphosphate	dATP	AFC000370	AFC000370	15993	U						33
2'-deoxycytidine-5'-monophosphate	dCMP	AFC000366	AFC000366	13945	U						33
2'-deoxycytidine-5'-triphosphate	dCTP	AFC000429	AFC000429	65091	U						33
2'-deoxyguanosine-5'-diphosphate	dGDP	AFC001557	AFC001557	135398595	U						33
2'-deoxyguanosine-5'-triphosphate	dGTP	AFC001583	AFC001583	135402022	U						33
2'-deoxyinosine		AFC001556	AFC001556	135398593	U						33
2'-deoxyuridine 5'-monophosphate	dUMP	AFC000427	AFC000427	65063	U						33
2'-hydroxypseudobaptigenin		AFC000902	AFC000902	5280616	U						33
2''-O-pentosyl-6-C-hexosyl luteolin	O-pentosyl-hexosyl luteolin 1	AFC001627	AFC001627	no entry found	F	NR	NR	NR	NR		144
2''-O-pentosyl-6-C-hexosylluteolin		AFC001775	AFC001775	no entry found	F	NR	NR	NR	NR		166
2''-O-pentosyl-8-C-hexosyl luteolin	O-pentosyl-hexosyl luteolin 2	AFC001628	AFC001628	no entry found	F	NR	NR	NR	NR		144
2'deoxy-thymidine-5'-diphospho-alpha-D-glucose	dTDP-alpha-D-glucose;dTDP-D-glucose	AFC000746	AFC000746	443210	U						33
22-hydroxydocosanoate	phellonic acid	AFC001248	AFC001248	5282922;17802799	U						33
22-oxo-docosanoate		AFC001438	AFC001438	52940144	U						33
22,23-dihydrobrassicasterol	22-dihydrobrassicasterol;24-epi-campesterol	AFC000980	AFC000601	5283637	S	NR	NR	NR	NR		35
22,23-dihydrobrassicasterol	22-dihydrobrassicasterol;24-epi-campesterol	AFC000980	AFC000601	5283637	U						33
22,23-dihydrobrassicasterol	22-dihydrobrassicasterol;24-epi-campesterol	AFC000980	AFC000601	5283637	U						3
24-alkyl sterol 1		AFC001629	AFC001629	no entry found	U						33
24-alkyl sterol 2		AFC001630	AFC001630	no entry found	U						33
24-alkyl sterol 3		AFC001631	AFC001631	no entry found	U						33
24-beta-ethyl-25-(27)-dehydrolophenol		AFC001632	AFC001632	no entry found	S	NR	NR	NR	NR		35
24-beta-ethyl-lophenol		AFC001633	AFC001633	no entry found	S	NR	NR	NR	NR		35
24-ethyl-5alpha-cholest-7-en-3beta-ol	22-dihydrochondrillasterol;16,17,25,26-tetrahydroelasterol;22-dihydrospinasterol;7-stigmasten-3beta-ol;24alpha-ethyllathosterol	AFC001541	AFC001541	131751392	S	NR	NR	NR	NR		35
24-ethyl-5alpha-cholest-7-en-3beta-ol	22-dihydrochondrillasterol;16,17,25,26-tetrahydroelasterol;22-dihydrospinasterol;7-stigmasten-3beta-ol;24alpha-ethyllathosterol	AFC001541	AFC001541	131751392	U						3
24-ethylcholesta-5,24-dien-3beta-ol	delta24-25-sitosterol;delta5,24-stigmastadienol	AFC000983	AFC000983	5283643	S	31.51	31.51	0.92	mg/100g	values for C. lanatus var. lanatus, see reference for values for var. citroides, detected with alternate methods	132
24-ethylcholesta-5,24-dien-3beta-ol	delta24-25-sitosterol;delta5,24-stigmastadienol	AFC000983	AFC000983	5283643	U						33
24-ethylidenelophenol	alpha1-sitosterol;citrostadienol	AFC001135	AFC001135	9548595	U						33
24-hydroxy-3-oxocholest-4-en-26-oyl-CoA		AFC001493	AFC001493	90658714	U						33
24-hydroxy-beta-amyrin		AFC001220	AFC001220	14167253	U						33
24-methyl-lathosterol		AFC001634	AFC001634	no entry found	S	NR	NR	NR	NR		35
24-methyldesmosterol		AFC000619	AFC000619	193567	U						33
24-methylenecholesterol	2,4-methylene-cholesterol;chalinasterol	AFC000477	AFC000477	92113	S	10	10	NR	mg/100g		130
24-methylenecholesterol	2,4-methylene-cholesterol;chalinasterol	AFC000477	AFC000477	92113	S	NR	NR	NR	NR		35
24-methylenecholesterol	2,4-methylene-cholesterol;chalinasterol	AFC000477	AFC000477	92113	U						33
24-methylenecholesterol	2,4-methylene-cholesterol;chalinasterol	AFC000477	AFC000477	92113	U						3
24-methylenecycloartane-3,28-diol	4alpha-hydroxymethyl,4beta,14alpha-dimethyl-9beta,19-cyclo-5alpha-ergost-24(241)-en-3beta-ol	AFC001441	AFC001441	52953106	U						33
24-methylenecycloartanol		AFC000495	AFC000495	94204	U						33
24-methylenelophenol	gramisterol	AFC000982	AFC000982	5283640	S	NR	NR	NR	NR		35
24-methylenelophenol	gramisterol	AFC000982	AFC000982	5283640	U						33
24,25-dihydrolanosterol		AFC000717	AFC000717	440560	U						33
25-dehydrochondrillasterol	25(27)-dehydro-chondrillasterol;(24S)-5alpha-stigmasta-7,22,25(27)-trien-3beta-ol	AFC001244	AFC001005	16058081	S	NR	NR	NR	NR		35
25-dehydrofungisterol	25(27)-dehydro-fungisterol	AFC001471	AFC001471	74051264	S	NR	NR	NR	NR		35
25-dehydroporiferasterol	22-dehydroclerosterol;25(27)-dehydroporiferasterol	AFC001603	AFC001603	146158414	S	NR	NR	NR	NR		35
26,27-dehydrozymosterol		AFC001505	AFC001505	91820155	U						33
3-(imidazol-4-yl)-2-oxopropyl dihydrogen phosphate	imidazole acetol-phosphate	AFC000111	AFC000111	792	U						33
3-acetamidopropanal		AFC001060	AFC001060	5460495	U						33
3-aminopropanal		AFC000011	AFC000011	75	U						33
3-carene	δ‐3‐carene	AFC000399	AFC000399	26049	F	NR	NR	NR	ug/kg	several mini-melons sampled	148
3-cis-dodecenoyl-CoA		AFC001188	AFC001188	11966217	U						33
3-cyano-L-alanine	beta-cyano-L-alanine	AFC000699	AFC000699	439742	U						33
3-cyanopyridine		AFC000012	AFC000012	79	U						33
3-dehydroquinate		AFC000666	AFC000666	439351	U						33
3-dehydroshikimate		AFC000700	AFC000700	439774	U						33
3-dehydrosphinganine		AFC000701	AFC000701	439853	U						33
3-demethylubiquinol-9		AFC001478	AFC001478	86583403	U						33
3-deoxy-D-arabino-heptulosonate-7-phosphate		AFC000574	AFC000574	160647	U						33
3-deoxy-D-manno-octulosonate		AFC000520	AFC000520	119228	U						33
3-epi-bryonolol	(3R,4aR,6bS,8aS,11R,12aR,12bS,14bS)-11-(hydroxymethyl)-4,4,6b,8a,11,12b,14b-heptamethyl-1,2,3,4a,5,6,7,8,9,10,12,12a,13,14-tetradecahydropicen-3-ol	AFC001783	AFC001235	10343330	U						3
3-hexanone		AFC000341	AFC000341	11509	U						33
3-hexaprenyl-4-hydroxybenzoate		AFC001175	AFC001175	11954011	U						33
3-hexenal	(Z)-3-hexenal	AFC000386	AFC000386	23234;643941	F,J	NR	NR	NR	NR		159
3-hexenal	(Z)-3-hexenal	AFC000386	AFC000386	23234;643941	V	NR	NR	NR	NR		141
3-hydroxy-1-(4-hydroxy-3-methoxyphenyl)propan-1-one	NXCPMSUBVRGTSE-UHFFFAOYSA-N	AFC001796	AFC001796	75142	U						3
3-hydroxy-1-(4-hydroxyphenyl)propan-1-one	LTEPZFZSPZASKJ-UHFFFAOYSA-N	AFC001797	AFC001797	638759	U						3
3-hydroxy-3-phenylpropionyl-CoA		AFC001464	AFC001464	70680321	U						33
3-hydroxy-5-cis-tetradecenoyl-CoA		AFC001508	AFC001508	91828294	U						33
3-hydroxyadipyl-CoA		AFC001133	AFC001133	9543337	U						33
3-hydroxycinnamic acid	m-coumaric acid	AFC000805	AFC000805	637541	R	1.81	14.96	NR	ug/g		140
3-hydroxypropyl-glucosinolate		AFC001221	AFC001221	14206092	U						33
3-keto-4-methylzymosterol	4alpha-methyl-5alpha-cholesta-8,24-dien-3-one	AFC001272	AFC001272	22298939	U						33
3-mercaptopyruvate		AFC000013	AFC000013	98	U						33
3-methoxy-4-hydroxy-5-all-trans-hexaprenylbenzoate	3-hexaprenyl-4-hydroxy-5-methoxybenzoate	AFC001450	AFC001450	54692918	U						33
3-methoxy-4-hydroxy-5-all-trans-nonaprenylbenzoate	3-nonaprenyl-4-hydroxy-5-methoxybenzoate	AFC001454	AFC001454	54738025	U						33
3-methoxy-4-hydroxy-5-all-trans-octaprenylbenzoate		AFC001456	AFC001456	54740344	U						33
3-methyl-2-butenal		AFC000419	AFC000419	61020	U						33
3-methyl-4-cis-hydroxy-2-butenal	(2Z)-4-hydroxy-3-methylbut-2-enal	AFC001200	AFC001200	12487266	U						33
3-methyl-4-trans-hydroxy-2-butenal		AFC001276	AFC001200	22841439	U						33
3-methylbutanal		AFC000342	AFC000342	11552	F	NR	NR	NR	NR		111
3-methylbutanal		AFC000342	AFC000342	11552	F	0.012	0.019	NR	ug/kg	several mini-melons sampled	148
3-methylbutanal		AFC000342	AFC000342	11552	F	NR	NR	NR	NR		152
3-methylbutanal		AFC000342	AFC000342	11552	F	24	24	NR	ng/g	cv Royal Armada fresh fruit; other samples include stored fruit, see ref for details	117
3-methylcrotonyl-CoA		AFC000014	AFC000014	99	U						33
3-methylglutaconyl-CoA		AFC001067	AFC001067	5462214	U						33
3-methylglutaric acid	methylglutaric acid	AFC000351	AFC000351	12284	H	NR	NR	NR	NR		178
3-methylsulfinylpropyl glucosinolate	glucoiberin	AFC000833	AFC000833	656543	U						33
3-O-feruloylsucrose	O-feruloylsucrose 3	AFC001729	AFC001729	no entry found	F	NR	NR	NR	NR		144
3-O-methylquercetin		AFC000905	AFC000905	5280681	U						33
3-octanone	3-oxooctane;ethyl pentyl ketone;methylheptanone	AFC000626	AFC000626	246728	J	NR	NR	NR	NR		159
3-octanone	3-oxooctane;ethyl pentyl ketone;methylheptanone	AFC000626	AFC000626	246728	F	18	18	NR	ng/g	cv Royal Armada fresh fruit; other samples include stored fruit, see ref for details	117
3-octaprenyl-4-hydroxybenzoate		AFC000916	AFC000916	5280831	U						33
3-oxo-2-(cis-2'-pentenyl)-cyclopentane-1-octanoate	(9R,13R)-10,11-dihydro-12-oxo-15-phytoenoic acid	AFC001327	AFC001327	5716902	U						33
3-oxo-23,24-bisnorchol-4-en-22-oyl-CoA		AFC001474	AFC001474	86208118	U						33
3-oxo-3-phenylpropionyl-CoA	benzoylacetyl-CoA	AFC001129	AFC001129	9543204	U						33
3-oxopropanoic acid	malonate semialdehyde	AFC000121	AFC000121	868	U						33
3-phospho-D-glycerate		AFC000641	AFC000641	439183	U						33
3-phospho-hydroxypyruvate	phosphohydroxypyruvate	AFC001057	AFC001057	5460375	U						33
3-phospho-L-serine		AFC000445	AFC000445	68841	U						33
3-S-methylmercaptopropionate	3-(methylthio)propionate	AFC001122	AFC001122	563;6992044	U						33
3-sulfinoalanine	L-cysteinesulfinic acid	AFC000841	AFC000841	1549098	U						33
3-ureidopropionate		AFC000015	AFC000015	111	U						33
3,22-dioxochol-4-en-24-oyl-CoA		AFC001494	AFC001494	90658757	U						33
3,24-dioxocholest-4-en-26-oyl-CoA		AFC001525	AFC001525	102515485	U						33
3,4-dihydroxy-5-all-trans-hexaprenylbenzoate	3-hexaprenyl-4,5-dihydroxybenzoate	AFC001451	AFC001451	54692919	U						33
3,4-dihydroxy-5-all-trans-nonaprenylbenzoate	3-nonaprenyl-4,5-dihydroxybenzoate	AFC001453	AFC001453	54738024	U						33
3,4-dihydroxy-5-all-trans-octaprenylbenzoate		AFC001455	AFC001455	54740337	U						33
3,4-dihydroxybenzaldehyde	protocatechualdehyde	AFC001849	AFC001849	8768	F	NR	NR	NR	NR	see reference for details	26
3,5-tetradecadienoate	megatomic acid;megatomoic acid	AFC001213	AFC001213	11172137	U						33
3,5-tetradecadienoyl-CoA		AFC001348	AFC001348	25245148	U						33
3,6,7,3'-tetra-methylquercetagetin	chrysosplenetin	AFC000949	AFC000949	5281608	U						33
3,7-di-O-methylquercetin		AFC000879	AFC000879	5280417	U						33
3,7,11,15-tetramethyl-2-hexadecen-1-ol		AFC001032	AFC000880	5366244	P,R	2045	2045	NR	Kovats (iu)		149
3,7,3'-tri-methylquercetagetin	chrysosplenol C	AFC000612	AFC000612	189065	U						33
3,7,4'-tri-O-methylquercetin	ayanin	AFC000906	AFC000906	5280682	U						33
3'-O-feruloylsucrose		AFC001635	AFC001635	no entry found	F	NR	NR	NR	NR		166
3',4',5,6-tetrahydroxy-3,7-dimethoxyflavone	3,7-di-methylquercetagetin	AFC000557	AFC000557	148856	U						33
3alpha,7alpha-dihydroxy-24-oxo-5beta-cholestanoyl CoA		AFC000867	AFC000867	44263314	U						33
3alpha,7alpha,12alpha-trihydroxy-24-oxo-5-beta-cholestanoyl CoA		AFC001394	AFC001394	45266665	U						33
4-(2'-carboxyphenyl)-4-oxobutyryl-CoA	2-succinylbenzoyl-CoA	AFC001537	AFC001537	129626606	U						33
4-(5,5-dimethylcyclohex-1-en-1-yl)cyclohex-1-ene-1-carbaldehyde		AFC001544	AFC001544	134716636	U						33
4-(beta-D-ribofuranosyl)aminobenzene-5'-phosphate		AFC001466	AFC001466	71296183	U						33
4-(cytidine 5'-diphospho)-2-C-methyl-D-erythritol	4-CDP-2-C-methyl-D-erythritol	AFC000743	AFC000743	443199	U						33
4-{[(2S,3R,4R,5S,6R)-3,4,5-trihydroxy-6-(hydroxymethyl)oxan-2-yl]oxy}benzaldehyde	OLZAGZCCJJBKNZ-UHFFFAOYSA-N	AFC001804	AFC001804	3303383	U						3
4-{[(2S,3R,4S,5S,6R)-3,4,5-trihydroxy-6-(hydroxymethyl)oxan-2-yl]oxy}benzaldehyde	OLZAGZCCJJBKNZ-UHFFFAOYSA-N	AFC001819	AFC001804	3303383	U						3
4-acetamidobutanal		AFC000725	AFC000725	440850	U						33
4-acetamidobutyric acid	4-acetamidobutanoate	AFC000376	AFC000376	18189	H	NR	NR	NR	NR		178
4-acetamidobutyric acid	4-acetamidobutanoate	AFC000376	AFC000376	18189	U						33
4-amino-2-methyl-5-diphosphomethylpyrimidine		AFC000031	AFC000031	217	U						33
4-amino-2-methyl-5-phosphomethylpyrimidine		AFC000030	AFC000030	216	U						33
4-amino-4-deoxychorismate		AFC001392	AFC001392	45266632	U						33
4-aminobenzoate		AFC000206	AFC000206	4876	U						33
4-aminobutyrate	GABA;gamma-aminobutyric acid	AFC000016	AFC000016	119	J	NR	NR	NR	NR		145
4-aminobutyrate	GABA;gamma-aminobutyric acid	AFC000016	AFC000016	119	J	NR	NR	NR	NR	several cultivars sampled	164
4-aminobutyrate	GABA;gamma-aminobutyric acid	AFC000016	AFC000016	119	T	NR	NR	NR	NR	several cultivars sampled	170
4-aminobutyrate	GABA;gamma-aminobutyric acid	AFC000016	AFC000016	119	U						33
4-aminobutyrate	GABA;gamma-aminobutyric acid	AFC000016	AFC000016	119	F	0.238	0.238	NR	mmol/L	cv Zaojia 8424 at a normal potassium level; grafts on other rootstocks and at low potassium are presented, see ref for details	116
4-butyrolactone	gamma-butyrolactone	AFC001787	AFC001787	7302	U						3
4-caffeoyl-glucose	caffeoylhexose II	AFC001644	AFC001644	129715972	F	NR	NR	NR	NR		166
4-carboxylato-2-hydroxyhexa-2,4-dienedioate(3-)	(1Z,3Z)-4-hydroxybuta-1,3-diene-1,2,4-tricarboxylate	AFC001458	AFC001458	54749447	U						33
4-carboxylatomethylenebut-2-en-4-olide	trans-dienelactone	AFC001132	AFC001132	9543248	U						33
4-coumarate	4-hydroxycinnamic acid	AFC000806	AFC000806	637542	F	NR	NR	NR	NR		180
4-coumarate	4-hydroxycinnamic acid;p-coumarate;trans-4-hydroxycinnamic acid	AFC000806	AFC000806	637542	F	NR	NR	NR	NR	see reference for details	26
4-coumarate	4-hydroxycinnamic acid;p-coumarate;trans-4-hydroxycinnamic acid	AFC000806	AFC000806	637542	G	NR	NR	NR	NR	see reference for details on strains Calhoun Grey, Charleston Gray, PI-296341 and Sugar Baby	125
4-coumarate	4-hydroxycinnamic acid;p-coumarate;trans-4-hydroxycinnamic acid	AFC000806	AFC000806	637542	R	0.5	2.51	NR	ug/g		140
4-coumarate	4-hydroxycinnamic acid;p-coumarate;trans-4-hydroxycinnamic acid	AFC000806	AFC000806	637542	S	19.621	19.621	NR	ug/ml		147
4-coumarate	4-hydroxycinnamic acid	AFC000806	AFC000806	637542	U						33
4-coumaroyl-CoA	p-coumaroyl CoA	AFC001096	AFC001096	6440013	F	NR	NR	NR	NR		180
4-coumaroyl-CoA	p-coumaroyl CoA	AFC001096	AFC001096	6440013	U						33
4-coumaroylshikimate		AFC001347	AFC001347	25245116	U						33
4-coumaryl alcohol		AFC000890	AFC000890	5280535	U						33
4-ethyl-2-hexynal		AFC000552	AFC000552	144524	F	8.36	8.36	NR	ug/kg	cv Proteo ungrafted watermelon	173
4-feruloylquinide	O-feruloylquinide	AFC001636	AFC001636	no entry found	F	NR	NR	NR	NR		166
4-feruloylquinide	O-feruloylquinide	AFC001636	AFC001636	no entry found	F	NR	NR	NR	NR		144
4-fumaryl-acetoacetate	4-maleylacetoacetic acid	AFC000875	AFC000875	5280393	U						33
4-guanidinobutyramide	tiformin	AFC000017	AFC000017	123	U						33
4-guanidinobutyrate	4-guanidinobutyric acid	AFC000072	AFC000072	500	F	NR	NR	NR	NR	see reference for details	26
4-guanidinobutyrate	4-guanidinobutyric acid	AFC000072	AFC000072	500	H	NR	NR	NR	NR		178
4-guanidinobutyrate	4-guanidinobutyric acid	AFC000072	AFC000072	500	U						33
4-hydroxy-3-methoxymandelate	vanillylmandelic acid	AFC000195	AFC000195	1245	H	NR	NR	NR	NR		178
4-hydroxy-6-methylquinoline-3-carboxylic acid		AFC001876	AFC001876	253823	F	NR	NR	NR	NR	see reference for details	26
4-hydroxybenzoate		AFC001447	AFC001447	54675830	U						33
4-hydroxybenzoic acid		AFC000019	AFC000019	135	G	NR	NR	NR	NR	see reference for details on strains Calhoun Grey, Charleston Gray, PI-296341 and Sugar Baby	125
4-hydroxybenzoic acid		AFC000019	AFC000019	135	H	NR	NR	NR	NR		178
4-hydroxybenzoic acid		AFC000019	AFC000019	135	S	59.707	59.707	NR	ug/ml		147
4-hydroxybutyrate		AFC000852	AFC000852	3037032	U						33
4-hydroxyphenylpyruvate		AFC000150	AFC000150	979	U						33
4-hydroxysphing-8-enine(1+)	delta8-phytosphingenine;phytosphing-8-enine(1+);4-hydroxy-trans-8-sphingenine	AFC001477	AFC001477	86290044	U						33
4-hydroxysphinganine	phytosphingosine	AFC001467	AFC001467	122121	F	NR	NR	NR	NR	see reference for details	26
4-hydroxysphinganine	phytosphingosine	AFC001467	AFC001467	122121	U						33
4-maleyl-acetoacetate		AFC001047	AFC001047	5460066	U						33
4-methyl-2-oxopentanoate		AFC000009	AFC000009	70	U						33
4-methyl-5-(2-phosphonooxyethyl)thiazole	4-methyl-5-hydroxyethylthiazole phosphate	AFC000183	AFC000183	1137	U						33
4-methyl-5-(beta-hydroxyethyl)thiazole	4-methyl-5-thiazoleethanol	AFC000182	AFC000182	1136	F	NR	NR	NR	NR	see reference for details	26
4-methyl-5-(beta-hydroxyethyl)thiazole	4-methyl-5-thiazoleethanol	AFC000182	AFC000182	1136	U						33
4-nonenal		AFC000974	AFC000974	5283337	F,J	NR	NR	NR	NR		159
4-O-beta-D-glucosyl-4-coumaric acid	p-coumaric acid glucoside 1	AFC001140	AFC001140	9840292	F,R	NR	NR	NR	NR		144
4-O-caffeoylshikimic acid	caffeoylshikimic acid II	AFC001421	AFC001421	49821869	F	NR	NR	NR	NR		166
4-O-feruloyl-D-quinic acid	O-feruloylquinate	AFC001148	AFC001148	10177048	U						33
4-oxobutanoate	succinate semialdehyde	AFC001131	AFC001131	9543238	U						33
4-oxononanal	4-oxo-nonan-1-al	AFC000564	AFC000564	156288	J	NR	NR	NR	NR		146
4-oxononanal	4-oxo-nonan-1-al	AFC000564	AFC000564	156288	J	NR	NR	NR	NR		35
4-oxononanal	4-oxo-nonan-1-al	AFC000564	AFC000564	156288	U						3
4-phospho-hydroxy-L-threonine		AFC001479	AFC001479	440901	U						33
4-prenylphlorisovalerophenone		AFC001203	AFC001203	13411740	U						33
4-pyridoxic acid	4-pyridoxate	AFC001867	AFC001867	6723	F	NR	NR	NR	NR	see reference for details	26
4-pyridoxolactone		AFC000560	AFC000560	151228	U						33
4,4-dimethyl-14alpha-formyl-5alpha-cholesta-8-en-3beta-ol	lanosten-3-ol-32-al;lanosterol-32-aldehyde;3beta-hydroxylanost-8-en-32-al;3-beta-hydroxylanost-8-en-32-aldehyde	AFC001234	AFC001234	15698824	U						33
4,4-dimethyl-14alpha-formyl-5alpha-cholesta-8,24-dien-3beta-ol		AFC001255	AFC001255	21121725	U						33
4,4-dimethyl-14alpha-hydroxymethyl-5alpha-cholesta-8-en-3beta-ol		AFC001233	AFC001233	15698821	U						33
4,4-dimethyl-14alpha-hydroxymethyl-5alpha-cholesta-8,24-dien-3beta-ol		AFC001268	AFC001268	22298935	U						33
4,4-dimethyl-5-alpha-cholesta-8,14-dien-3-beta-ol		AFC000595	AFC000595	167817	U						33
4,4-dimethyl-5-alpha-cholesta-8,14,24-trien-3-beta-ol		AFC000748	AFC000748	443212	U						33
4,4-dimethyl-5alpha-cholesta-8-en-3-beta-ol		AFC001192	AFC001192	12070223	U						33
4,4-dimethylzymosterol	14-demethyllanosterol	AFC000594	AFC000594	165609	U						33
4,5-dihydroxy-2,3-pentanedione		AFC001162	AFC001162	11170991	U						33
4,5-epoxy-2-nonenal	3-(3-butyloxiranyl)propanal	AFC000799	AFC000799	85412273	F	0.006	0.008	NR	ug/kg	several mini-melons sampled	148
4'-phosphopantetheine	pantetheine 4'-phosphate	AFC000153	AFC000153	987	F	NR	NR	NR	NR		180
4'-phosphopantetheine	pantetheine 4'-phosphate	AFC000153	AFC000153	987	J	NR	NR	NR	NR		158
4'-phosphopantetheine	pantetheine 4'-phosphate	AFC000153	AFC000153	987	J	NR	NR	NR	NR		145
4'-phosphopantetheine	pantetheine 4'-phosphate	AFC000153	AFC000153	987	U						33
4alpha-carboxy-4beta-methyl-5alpha-cholesta-8-en-3beta-ol		AFC001381	AFC001271	44263317	U						33
4alpha-carboxy-4beta-methyl-5alpha-cholesta-8,24-dien-3beta-ol		AFC001271	AFC001271	22298938	U						33
4alpha-carboxy-4beta,14alpha-dimethyl-9beta,19-cyclo-5alpha-ergost-24(241)-en-3beta-ol		AFC001600	AFC001600	137333860	U						33
4alpha-carboxy-5alpha-cholesta-8-en-3beta-ol		AFC001382	AFC001382	44263318	U						33
4alpha-carboxy-5alpha-cholesta-8,24-dien-3beta-ol		AFC001370	AFC001370	42608397	U						33
4alpha-carboxy-ergosta-7,24(241)-dien-3beta-ol		AFC001524	AFC001524	102515460	U						33
4alpha-carboxy-stigmasta-7,24(241)-dien-3beta-ol		AFC001523	AFC001523	102515427	U						33
4alpha-formyl-4beta-methyl-5alpha-cholesta-8-en-3beta-ol		AFC001383	AFC001383	44263319	U						33
4alpha-formyl-4beta-methyl-5alpha-cholesta-8,24-dien-3beta-ol		AFC001270	AFC001270	22298937	U						33
4alpha-formyl-5alpha-cholesta-8-en-3beta-ol		AFC001384	AFC001384	44263320	U						33
4alpha-formyl-5alpha-cholesta-8,24-dien-3beta-ol		AFC001274	AFC001274	22298941	U						33
4alpha-formyl-ergosta-7,24(241)-dien-3beta-ol		AFC001519	AFC001519	102515184	U						33
4alpha-formyl-stigmasta-7,24(241)-dien-3beta-ol		AFC001520	AFC001520	102515345	U						33
4alpha-formyl,4beta,14alpha-dimethyl-9beta,19-cyclo-5alpha-ergost-24(241)-en-3beta-ol		AFC001601	AFC001601	137333861	U						33
4alpha-hydroxymethyl-4beta-methyl-5alpha-cholesta-8-en-3beta-ol		AFC001385	AFC001385	44263321	U						33
4alpha-hydroxymethyl-4beta-methyl-5alpha-cholesta-8,24-dien-3beta-ol		AFC001269	AFC001269	22298936	U						33
4alpha-hydroxymethyl-5alpha-cholesta-8-en-3beta-ol		AFC001386	AFC001386	44263322	U						33
4alpha-hydroxymethyl-5alpha-cholesta-8,24-dien-3beta-ol		AFC001273	AFC001273	22298940	U						33
4alpha-hydroxymethyl-ergosta-7,24(241)-dien-3beta-ol		AFC001522	AFC001522	102515391	U						33
4alpha-hydroxymethyl-stigmasta-7,24(241)-dien-3beta-ol		AFC001517	AFC001517	102515003	U						33
4alpha-methyl-5alpha-cholesta-8-en-3-one		AFC001387	AFC001387	44263323	U						33
4alpha-methyl-5alpha-ergosta-8,14,24(28)-trien-3beta-ol		AFC000749	AFC000749	443237	U						33
4alpha-methyl-5alpha-ergosta-8,24-dien-3beta-ol	4alpha-methylfecosterol	AFC000618	AFC000618	193524	U						33
4alpha-methyl-cholesta-8-enol		AFC001105	AFC001105	6452640	U						33
4alpha-methylzymosterol		AFC001267	AFC001267	22212495	U						33
4H-pyran-4-one		AFC000294	AFC000294	7968	P,R	1269	1269	NR	Kovats (iu)		149
5-(methylthio)-2,3-dioxopentyl phosphate		AFC000078	AFC000078	561	U						33
5-alpha-pregnane-3,20-dione		AFC000487	AFC000483	92810	U						33
5-amino-1-(5-phospho-D-ribosyl)imidazole		AFC001243	AFC001243	16048619	U						33
5-amino-6-(5-phospho-D-ribitylamino)uracil		AFC001250	AFC001250	18666812	U						33
5-amino-6-(5-phospho-D-ribosylamino)uracil		AFC001349	AFC001349	25245199	U						33
5-amino-6-(D-ribitylamino)uracil		AFC000617	AFC000617	193516	U						33
5-amino-levulinate		AFC000020	AFC000020	137	U						33
5-androstene-3,17-dione		AFC000570	AFC000570	160531	U						33
5-beta-pregnan-3,20 dione		AFC000483	AFC000483	92745	U						33
5-dehydroavenasterol		AFC001283	AFC001283	23724575	U						33
5-dehydroepisterol		AFC001155	AFC001155	10894570	U						33
5-dehydrokarounidiol	(3R,6bS,8aS,11R,12aR,12bS,14bR)-11-(hydroxymethyl)-4,4,6b,8a,11,12b,14b-heptamethyl-1,2,3,7,8,9,10,12,12a,13-decahydropicen-3-ol	AFC001781	AFC001781	10094697	U						3
5-deoxy-D-glucuronate		AFC001409	AFC001409	46878459	U						33
5-enolpyruvyl-shikimate-3-phosphate	5-O-(1-carboxylatovinyl)-3-phosphonatoshikimate	AFC001223	AFC001223	14506801	U						33
5-formamido-1-(5-phospho-D-ribosyl)imidazole-4-carboxamide(2-)	phosphoribosyl-formamido-carboxamide;FAICAR	AFC001393	AFC001393	45266654	U						33
5-formyl-tetrahydrofolate	leucovorin	AFC001585	AFC001585	135403648	U						33
5-hydroxy-2-oxo-4-ureido-2,5-dihydro-1H imidazole-5-carboxylate		AFC000761	AFC000761	443736	U						33
5-hydroxy-coniferaldehyde		AFC000958	AFC000958	5282094	U						33
5-hydroxyferulate		AFC001457	AFC001457	54740354	U						33
5-hydroxyhexanoic acid		AFC000597	AFC000597	170748	H	NR	NR	NR	NR		178
5-hydroxyindole acetaldehyde		AFC000460	AFC000460	74688	U						33
5-hydroxyindole thiazolidine carboxylate		AFC001548	AFC001548	134820455	U						33
5-hydroxyindole-3-acetic acid	2-(5-hydroxy-1H-indol-3-yl)acetic acid;5-HIAA;5-hydroxyindoleacetate	AFC001871	AFC001871	1826	F	NR	NR	NR	NR	see reference for details	26
5-hydroxyisourate		AFC000628	AFC000628	250388	U						33
5-hydroxytryptophan		AFC001882	AFC001882	144	F	NR	NR	NR	NR	see reference for details	26
5-hydroxytryptophol		AFC000318	AFC000318	9061	U						33
5-methoxyflavanone		AFC001886	AFC001886	147795	F	NR	NR	NR	NR	see reference for details	26
5-methoxyindole-3-acetic acid	5-methoxyindoleacetate;methoxy indoleacetic acid	AFC001877	AFC001877	18986	F	NR	NR	NR	NR	see reference for details	26
5-methyl-tetrahydrofolate		AFC001590	AFC001590	135483998	U						33
5-methylcytidine		AFC001887	AFC001887	92918	F	NR	NR	NR	NR	see reference for details	26
5-methylcytosine		AFC001845	AFC001845	65040	F	NR	NR	NR	NR	see reference for details	26
5-methyltetrahydropteroyltri-L-glutamate		AFC001554	AFC001554	135398574	U						33
5-methylthioribulose-1-phosphate	S-methyl-5-thio-D-ribulose 1-phosphate	AFC000602	AFC000602	174549	U						33
5-O-caffeoylshikimic acid	caffeoylshikimate;dattelic acid	AFC000952	AFC000952	5281762	F	NR	NR	NR	NR		166
5-O-caffeoylshikimic acid	caffeoylshikimate;dattelic acid	AFC000952	AFC000952	5281762	U						33
5-pentyl-2(5H)-furanone	5-pentylfuran-2(5H)-one;2-nonen-4-olide;2-nonenoic acid gamma-lactone	AFC000469	AFC000469	89559	F,J	NR	NR	NR	NR		159
5-phospho-alpha-D-ribose 1-diphosphate	phosphoribosyl pyrophosphate;alpha-phosphoribosylpyrophosphoric acid	AFC000274	AFC000274	7339	U						33
5-phospho-beta-D-ribosyl-amine	5-phosphoribosylamine	AFC000702	AFC000702	439905	U						33
5-phospho-ribosyl-glycineamide	glycinamide ribonucleotide;glycineamideribotide	AFC000577	AFC000577	160913	U						33
5-phosphoribosyl-N-formylglycineamidine		AFC001139	AFC001139	9552078	U						33
5,10-methenyltetrahydrofolate		AFC001578	AFC001578	135398657	U						33
5,10-methylenetetrahydrofolate		AFC001576	AFC001576	135398644	U						33
5,24-stigmastadienol	delta-5,24-stigmastadienol	AFC001637	AFC001637	no entry found	S	8	8	NR	mg/100g		130
5,3'-dihydroxyflavone		AFC001884	AFC001884	676030	F	NR	NR	NR	NR	see reference for details	26
5,6-dihydrouracil		AFC000086	AFC000086	649	U						33
5,6-dihydroxyindole		AFC000514	AFC000514	114683	U						33
5,7-dihydroxy-2-(4-hydroxyphenyl)-6-[(4-hydroxyphenyl)methyl]-8-[(2S,3R,4R,5S,6R)-3,4,5-trihydroxy-6-(hydroxymethyl)oxan-2-yl]chromen-4-one	IFNYXORISMJQJH-UHFFFAOYSA-N	AFC001812	AFC001812	102446088	U						3
5,7-dihydroxy-2-(4-hydroxyphenyl)-8-[(4-hydroxyphenyl)methyl]-6-[(2S,3R,4R,5S,6R)-3,4,5-trihydroxy-6-(hydroxymethyl)oxan-2-yl]chromen-4-one	QSEKYEYPJACWFH-UHFFFAOYSA-N	AFC001811	AFC001811	102446088	U						3
5,7-dihydroxy-2-(4-methoxyphenyl)-6-[(2S,3R,4R,5S,6R)-3,4,5-trihydroxy-6-(hydroxymethyl)oxan-2-yl]chromen-4-one	AQHMJUSCGYYXRM-UHFFFAOYSA-N	AFC001818	AFC001818	74977540	U						3
5,7-dihydroxy-6-[(2S,3R,4R,5S,6R)-3,4,5-trihydroxy-6-(hydroxymethyl)oxan-2-yl]-2-(4-{[(2S,3R,4S,5S,6R)-3,4,5-trihydroxy-6-(hydroxymethyl)oxan-2-yl]oxy}phenyl)chromen-4-one	SFNFQCXADNWOCI-UHFFFAOYSA-N	AFC001809	AFC001809	73981632	U						3
5,7-dihydroxy-8-[(4-hydroxyphenyl)methyl]-6-[(2S,3R,4R,5S,6R)-3,4,5-trihydroxy-6-(hydroxymethyl)oxan-2-yl]-2-(4-{[(2S,3R,4S,5S,6R)-3,4,5-trihydroxy-6-(hydroxymethyl)oxan-2-yl]oxy}phenyl)chromen-4-one	SQHLGKXVTSPZLS-UHFFFAOYSA-N	AFC001824	AFC001824	no entry found	U						3
5,7,22,24(28)-ergostatetraenol		AFC001160	AFC001160	11090531	U						33
5,7,24(28)-ergostatrienol		AFC001404	AFC001155	46173808	U						33
5,9-undecadien-1-ol, 2,6,10-trimethyl-	dihydro-apo-(E)-farnesal;2,6,10-trimethyl-5,9-undecadien-1-ol_x000D_ 2,6,10-trimethylundeca-5,9-dienol	AFC000470	AFC000470	91116	F	NR	NR	NR	NR		180
5'-deoxy-5'-methylthioadenosine	S-methyl-5'-thioadenosine;5'-methylthioadenosine;vitamin L2	AFC000639	AFC000639	439176	F	NR	NR	NR	NR	see reference for details	26
5'-deoxy-5'-methylthioadenosine	S-methyl-5'-thioadenosine;5'-methylthioadenosine;vitamin L2	AFC000639	AFC000639	439176	U						33
5'-deoxyadenosine		AFC000640	AFC000640	439182	U						33
5'-O-beta-D-glucosylpyridoxine	beta-D-glucopyranoside pyridoxol;5'-pyridoxine glucoside;pyridoxine beta-glucoside;pyridoxine-5’-beta-D-glucoside;pyridoxine O-glucoside	AFC001902	AFC001902	440188	F	NR	NR	NR	NR	see reference for details	26
5'-phosphoribosyl-4-(N-succinocarboxamide)-5-aminoimidazole	saicar	AFC000575	AFC000575	160666	U						33
5'-phosphoribosyl-N-formylglycineamide		AFC001497	AFC001497	90658924	U						33
5',5'''-diadenosine triphosphate	P(1),P(3)-bis(5'-adenosyl) triphosphate	AFC001309	AFC001309	25201180	U						33
5alpha-cholesta-7,24-dien-3beta-ol		AFC001043	AFC001043	5459827	U						33
5alpha-cholesta-8-en-3-one		AFC001388	AFC001388	44263324	U						33
5alpha-cholesta-8,24-dien-3-one		AFC001275	AFC001275	22298942	U						33
5alpha-cholestan-3-one		AFC000478	AFC000478	92128	U						33
6-benzylaminopurine	N6-benzyladenine;N-benzyladenine	AFC001883	AFC001883	62389	F	NR	NR	NR	NR	see reference for details	26
6-hydroxymethyl-7,8-dihydropterin		AFC001551	AFC001551	135398568	U						33
6-hydroxymethyl-dihydropterin diphosphate	(7,8-dihydropterin-6-yl)methyl diphosphate	AFC001562	AFC001562	135398611	U						33
6-methoxy-3-methyl-2-all-trans-nonaprenyl-1,4-benzoquinol		AFC001429	AFC001429	50986193	U						33
6-methoxy-3-methyl-2-all-trans-octaprenyl-1,4-benzoquinol		AFC001423	AFC001423	49852330	U						33
6-methyl-5-hepten-2-one		AFC000323	AFC000323	9862	F	517	517	11	ug/kg	variety Rugby, see reference for values in unripe and overripe fruit	142
6-methyl-5-hepten-2-one		AFC000323	AFC000323	9862	F	25	25	NR	ng/g	C. vulgaris Schrad	163
6-methyl-5-hepten-2-one		AFC000323	AFC000323	9862	F	10	19.1	NR	percent VOC		171
6-methyl-5-hepten-2-one		AFC000323	AFC000323	9862	F	NR	NR	NR	NR		180
6-methyl-5-hepten-2-one		AFC000323	AFC000323	9862	F	NR	NR	NR	NR		111
6-methyl-5-hepten-2-one		AFC000323	AFC000323	9862	F	0	157	15	ng/g		120
6-methyl-5-hepten-2-one		AFC000323	AFC000323	9862	F	0.046	0.099	NR	ug/kg	several mini-melons sampled	148
6-methyl-5-hepten-2-one		AFC000323	AFC000323	9862	H	NR	NR	NR	NR		190
6-methyl-5-hepten-2-one		AFC000323	AFC000323	9862	J	NR	NR	NR	NR		159
6-methyl-5-hepten-2-one		AFC000323	AFC000323	9862	J	NR	NR	NR	NR		146
6-methyl-5-hepten-2-one		AFC000323	AFC000323	9862	J	NR	NR	NR	NR		35
6-methyl-5-hepten-2-one		AFC000323	AFC000323	9862	U						3
6-methyl-5-hepten-2-one		AFC000323	AFC000323	9862	F	53.1	53.1	NR	mg/100 g	cv F1 Oneida; grafts onto citron rootstocks were performed, see ref for details	187
6-methyl-5-hepten-2-one		AFC000323	AFC000323	9862	F	147	147	NR	ng/g	cv Royal Armada fresh fruit; other samples include stored fruit, see ref for details	117
6-methylcoumarin	6-methylbenzopyrone	AFC001855	AFC001855	7092	F	NR	NR	NR	NR	see reference for details	26
6-methylhept-5-en-2-ol	sulcatol	AFC000383	AFC000383	20745	F	NR	NR	NR	NR		180
6-methylhept-5-en-2-ol	sulcatol	AFC000383	AFC000383	20745	F	0.004	0.025	NR	ug/kg	several mini-melons sampled	148
6-methylhept-5-en-2-ol	sulcatol	AFC000383	AFC000383	20745	F,J	NR	NR	NR	NR		159
6-methylhept-5-en-2-ol	sulcatol	AFC000383	AFC000383	20745	H	NR	NR	NR	NR		190
6-methylhept-5-en-2-ol	sulcatol	AFC000383	AFC000383	20745	J	NR	NR	NR	NR		146
6-methylhept-5-en-2-ol	sulcatol	AFC000383	AFC000383	20745	F	2	2	NR	ng/g	cv Royal Armada fresh fruit; other samples include stored fruit, see ref for details	117
6-methylmercaptopurine		AFC001859	AFC001859	5778	F	NR	NR	NR	NR	see reference for details	26
6-O-phosphonohexopyranose	D-hexose 6-phosphate	AFC000029	AFC000029	208	U						33
6-phospho-2-dehydro-D-gluconate		AFC001108	AFC001108	6602434	U						33
6-phospho-D-gluconate	6-phosphogluconic acid	AFC000472	AFC000472	91493	U						33
6-phospho-D-glucono-1,5-lactone	D-glucono-1,5-lactone 6-phosphate	AFC000680	AFC000680	439452	U						33
6-prenylnaringenin	5,7,4'-trihydroxy-6-prenylflavanone	AFC001904	AFC001904	155094	F	NR	NR	NR	NR	see reference for details	26
6,7-dimethyl-8-(1-D-ribityl)lumazine		AFC000596	AFC000596	168989	U						33
6'-O-feruloylsucrose	O-feruloylsucrose 1	AFC001102	AFC001102	6443651	F,S	18.3	18.3	6.6	ug/100g	detected in seed 521.6±22.0	144
7-cis-lycopene	(6E,8Z,10E,12E,14E,16E,18E,20E,22E,24E,26E)-2,6,10,14,19,23,27,31-octamethyldotriaconta-2,6,8,10,12,14,16,18,20,22,24,26,30-tridecaene	AFC001785	AFC001156	101118616	F	4.16	6.36	NR	ug/g	3 cultivars sampled	169
7-cis-lycopene	(6E,8Z,10E,12E,14E,16E,18E,20E,22E,24E,26E)-2,6,10,14,19,23,27,31-octamethyldotriaconta-2,6,8,10,12,14,16,18,20,22,24,26,30-tridecaene	AFC001785	AFC001156	101118616	U						3
7-deaza-7-aminomethyl-guanine	preQ1	AFC001549	AFC001549	135398563	U						33
7-dehydrocholesterol		AFC000675	AFC000675	439423	U						33
7-dehydrodesmosterol		AFC000716	AFC000716	440558	U						33
7-keto-8-aminopelargonate	8-amino-7-oxononanoate	AFC001368	AFC001368	36688192	U						33
7,2'-dihydroxy-4'-methoxy-isoflavanol		AFC001316	AFC001316	25202196	U						33
7,8-diaminopelargonate	7,8-diaminononanoate	AFC001367	AFC001367	28145934	U						33
7,8-dihydro-D-neopterin		AFC001584	AFC001584	135402024	U						33
7,8-dihydro-D-neopterin 2',3'-cyclic phosphate(1-)	7,8-dihydroneopterin 2',3'-cyclic phosphate	AFC001595	AFC001595	135911931	U						33
7,8-dihydrofolate monoglutamate		AFC001559	AFC001559	135398603	U						33
7,8-dihydroneopterin 3'-phosphate		AFC001560	AFC001560	135398608	U						33
7,8-dihydroneopterin triphosphate		AFC001561	AFC001561	135398610	U						33
7,8-dihydropteroate	dihydropteroate	AFC001580	AFC001580	135398662	U						33
7,9,9'-tri-cis-neurosporene	proneurosporene	AFC001339	AFC000910	25244751	F	NR	NR	NR	NR		35
7,9,9'-tri-cis-neurosporene	proneurosporene	AFC001339	AFC000910	25244751	U						33
71-hydroxychlorophyll a		AFC001415	AFC001415	90657665	U						33
71-hydroxychlorophyllide a		AFC001413	AFC001413	122706035	U						33
8-methylnonenoate		AFC001030	AFC001030	5365959	U						33
8-oxo-7,8-dihydro-2'-GTP	8-hydroxy-2'-deoxyguanosine	AFC001586	AFC001586	135440064	U						33
8-oxo-dGTP		AFC001550	AFC001550	135398565	U						33
8-phospho-3-deoxy-D-manno-oct-2-ulosonic acid	3-deoxy-D-manno-octulosonate 8-phosphate	AFC001237	AFC001237	15942880	U						33
8'-(3,4-dihydroxy-5-alkenyl)phenyl-3-[9'E,11'E-pentadecatrienyl]catechol	urushiol dimer	AFC001506	AFC001506	91820417	U						33
8'-hydroxyabscisate		AFC001350	AFC001350	25245404	U						33
9-cis-violaxanthin		AFC000962	AFC000792	5282218	U						33
9-HOTrE	9-hydroxy-(10E,12Z,15Z)-octadecatrienoic acid	AFC001896	AFC001896	6439873	F	NR	NR	NR	NR	see reference for details	26
9-ribosyl-trans-zeatin 5'-monophosphate	trans-zeatin riboside monophosphate	AFC001165	AFC001165	11561034	U						33
9,10-12,13-diepoxyoctadecanoate	diepoxylinoleic acid;linoleic acid dioxide	AFC000375	AFC000375	18172	U						33
9,10-dihydroxyoctadeca-12,15-dienoate	9,10-DiHODE	AFC001434	AFC001434	52940106	U						33
9,10-epoxyoctadeca-12,15-dienoate	9(10)-EpODE	AFC001435	AFC001435	52940134	U						33
9,10-epoxystearate		AFC001251	AFC001251	19746553	U						33
9,12-octadecadienoyl chloride, (Z,Z)-	linoleoyl chloride	AFC000498	AFC000498	98987	P,R	2139	2139	NR	Kovats (iu)		149
9,15,9'-tri-cis-zeta-carotene		AFC001293	AFC000909	24755586	U						33
9,17-octadecadiene-12,14-diyne-1,11,16-triol	methyl2-(2,4-dimethylthiazol-5-yl)acetate	AFC001895	AFC001895	71307306	F	NR	NR	NR	NR	see reference for details	26
9,9'-di-cis-zeta-carotene	9,9′-di-(Z)-zeta-carotene	AFC001097	AFC000909	6440490	F	NR	NR	NR	NR		180
9,9'-di-cis-zeta-carotene	9,9′-di-(Z)-zeta-carotene	AFC001097	AFC000909	6440490	U						33
9'-cis-neoxanthin		AFC000961	AFC000935	5282217	U						33
abscisic acid		AFC001038	AFC001038	5375200	F	NR	NR	NR	NR		180
abscisic acid		AFC001038	AFC001038	5375200	G	NR	NR	NR	NR	see reference for details on strains Calhoun Grey, Charleston Gray, PI-296341 and Sugar Baby	125
abscisic aldehyde		AFC000964	AFC000964	5282224	U						33
acetaldehyde		AFC000023	AFC000023	177	F	NR	NR	NR	NR		180
acetaldehyde		AFC000023	AFC000023	177	F	NR	NR	NR	NR		111
acetaldehyde		AFC000023	AFC000023	177	F,H	26	40	NR	percent VOC		171
acetaldehyde		AFC000023	AFC000023	177	H	NR	NR	NR	NR		190
acetaldehyde		AFC000023	AFC000023	177	J	NR	NR	NR	NR		159
acetaldehyde		AFC000023	AFC000023	177	U						33
acetaldehyde		AFC000023	AFC000023	177	F	529	529	NR	ng/g	cv Royal Armada fresh fruit; other samples include stored fruit, see ref for details	117
acetanilide	N-phenylacetamide;acetylaniline;N-acetylarylamine	AFC001842	AFC001842	904	F	NR	NR	NR	NR	see reference for details	26
acetate		AFC000021	AFC000021	175	J	NR	NR	NR	NR		158
acetate		AFC000021	AFC000021	175	J	NR	NR	NR	NR		145
acetate		AFC000021	AFC000021	175	T	NR	NR	NR	NR	several cultivars sampled	170
acetate		AFC000021	AFC000021	175	U						33
acetate		AFC000021	AFC000021	175	F	0.127	0.127	NR	mmol/L	cv Zaojia 8424 at a normal potassium level; grafts on other rootstocks and at low potassium are presented, see ref for details	116
acetic acid		AFC000022	AFC000022	176	F	NR	NR	NR	NR		111
acetic acid		AFC000022	AFC000022	176	F,H	0	6.7	NR	percent VOC		171
acetic acid		AFC000022	AFC000022	176	J	NR	NR	NR	NR		145
acetic acid		AFC000022	AFC000022	176	F	65	65	NR	ng/g	cv Royal Armada fresh fruit; other samples include stored fruit, see ref for details	117
acetic acid, 6-morpholin-4-yl-9-oxobicyclo[3.3.1]non-3-yl ester		AFC000801	AFC000801	580937	P,R	2143	2143	NR	Kovats (iu)		149
acetoacetate		AFC001120	AFC001120	6971017	U						33
acetoacetyl-CoA		AFC000480	AFC000480	92153	U						33
acetoin	3-hydroxy-2-butanone	AFC000024	AFC000024	179	F	NR	NR	NR	NR		111
acetone	2-propanone	AFC000025	AFC000025	180	F,H	2.5	4.8	NR	percent VOC		171
acetophenone	1-phenylethanone;benzoyl methide	AFC000278	AFC000278	7410	J	NR	NR	NR	NR		35
acetophenone	1-phenylethanone;benzoyl methide	AFC000278	AFC000278	7410	U						3
acetyl coenzyme A		AFC000764	AFC000764	444493	F	NR	NR	NR	NR		180
acetyl coenzyme A		AFC000764	AFC000764	444493	U						33
acetylornithine	N-acetyl-L-ornithine	AFC001123	AFC001123	6992102	U						33
acrolein	2-propenal	AFC000291	AFC000291	7847	U						33
acrylamide	2-propenamide	AFC000267	AFC000267	6579	U						33
acrylate		AFC000395	AFC000395	25188	U						33
acrylonitrile	propenenitrile;vinyl cyanide	AFC000292	AFC000292	7855	U						33
adenine		AFC000026	AFC000026	190	F	NR	NR	NR	NR	see reference for details	26
adenine		AFC000026	AFC000026	190	U						33
adenosine		AFC000417	AFC000417	60961	F	NR	NR	NR	NR	see reference for details	26
adenosine		AFC000417	AFC000417	60961	U						33
adenosine		AFC000417	AFC000417	60961	F	0.008	0.008	NR	mmol/L	cv Zaojia 8424 at a normal potassium level; grafts on other rootstocks and at low potassium are presented, see ref for details	116
adenosine 3',5'-bisphosphate		AFC000567	AFC000567	159296	U						33
adenosine 5'-phosphosulfate		AFC000326	AFC000326	10238	U						33
adenosine diphosphate glucose	ADP-alpha-D-glucose	AFC001371	AFC001371	42609821	U						33
adenosine monophosphate	AMP	AFC000238	AFC000238	6083	F	NR	NR	NR	NR	see reference for details	26
adenosine monophosphate	AMP	AFC000238	AFC000238	6083	U						33
adenylyl-molybdopterin		AFC001598	AFC001598	135926598	U						33
ADP		AFC000228	AFC000228	6022	U						33
ADP ribose 1''-phosphate		AFC001372	AFC001372	42626433	U						33
ADP ribose 1'',2''-cyclic phosphate		AFC001357	AFC001357	25245989	U						33
ADP-ribose		AFC000775	AFC000775	445794	U						33
agmatine		AFC000868	AFC000868	199	U						33
AICA ribonucleotide	aminoimidazole carboxamide ribonucleotide	AFC000430	AFC000430	65110	U						33
ajugol		AFC001081	AFC001081	6325127	F	NR	NR	NR	NR		166
ajugol		AFC001081	AFC001081	6325127	F	NR	NR	NR	NR		144
ajugose		AFC000733	AFC000733	441421	U						33
alanine		AFC000081	AFC000081	602	F	0.017	0.017	NR	g/100g		34
alanine		AFC000081	AFC000081	602	F	NR	NR	NR	NR		180
alanine		AFC000081	AFC000081	602	F,S	2000	2000	NR	ppm	15000 ppm in seed	35
alanine		AFC000081	AFC000081	602	G	NR	NR	NR	NR		167
alanine		AFC000081	AFC000081	602	J	NR	NR	NR	NR		145
alanine		AFC000081	AFC000081	602	L	NR	NR	NR	NR	assayed under various conditions	154
alanine		AFC000081	AFC000081	602	T	NR	NR	NR	NR	several cultivars sampled	170
alanine		AFC000081	AFC000081	602	F	0.399	0.399	NR	mmol/L	cv Zaojia 8424 at a normal potassium level; grafts on other rootstocks and at low potassium are presented, see ref for details	116
alanine glutamate	L-Ala-L-Glu	AFC000546	AFC000546	128841	U						33
aldehydo-D-galacturonate		AFC000845	AFC000845	1593918	U						33
aldehydo-D-glucuronate		AFC001048	AFC000845	5460126	U						33
aldehydo-D-mannose		AFC000584	AFC000509	161658	U						33
all-trans-geranyl-geranyl diphosphate		AFC001075	AFC001075	5497105	U						33
all-trans-hexaprenyl diphosphate		AFC000878	AFC000878	5280413	U						33
all-trans-lycopene		AFC000785	AFC001156	446925	F	4532	4532	NR	ug/100g		34
all-trans-lycopene		AFC000785	AFC001156	446925	F	30	70	NR	mg/kg		180
all-trans-lycopene		AFC000785	AFC001156	446925	F	2383.3	2383.3	286.2	ug/100g		161
all-trans-lycopene		AFC000785	AFC001156	446925	F	0	45.8	5.3	ng/g		120
all-trans-lycopene		AFC000785	AFC001156	446925	F	43.56	43.56	0.31	ug/g	cv LSW177	174
all-trans-lycopene		AFC000785	AFC001156	446925	F	27.8	55.1	NR	ug/g	3 cultivars sampled	169
all-trans-lycopene		AFC000785	AFC001156	446925	F	11.6	14.3	NR	mg/kg	several cultivars sampled	177
all-trans-lycopene		AFC000785	AFC001156	446925	F	42.7	102.4	NR	mg/kg	several cultivars sampled	110
all-trans-lycopene		AFC000785	AFC001156	446925	F	45	900	NR	ppm		35
all-trans-lycopene		AFC000785	AFC001156	446925	F	0.1	0.1	NR	percent wwt		30
all-trans-lycopene		AFC000785	AFC001156	446925	F	46	46	NR	ug/g	cv LSW177	129
all-trans-lycopene		AFC000785	AFC001156	446925	J	NR	NR	NR	NR		145
all-trans-lycopene		AFC000785	AFC001156	446925	U						33
all-trans-lycopene		AFC000785	AFC001156	446925	U						36
all-trans-lycopene		AFC000785	AFC001156	446925	U						3
all-trans-lycopene		AFC000785	AFC001156	446925	U						122
all-trans-lycopene		AFC000785	AFC001156	446925	W	3.5	3.5	NR	g/100g	variety 7197, see ref for details on spray dried powder formulation and values for powder derived from rind	191
all-trans-lycopene		AFC000785	AFC001156	446925	F	2004.51	2004.51	178.8	ug/g dw	cv Lizhiguan; data for 11 other cultivars are presented, see ref for details	126
all-trans-lycopene	15-cis-lycopene	AFC000785	AFC001156	446925	F	4.91	4.91	0.76	ug/g dw	cv Lizhiguan; data for 11 other cultivars are presented, see ref for details	126
all-trans-lycopene	15-cis-lycopene	AFC000785	AFC001156	446925	F	NR	NR	NR	NR	red flesh color	150
all-trans-lycopene	15-cis-lycopene	AFC000785	AFC001156	446925	F	trace	NR	NR	NR	pale yellow flesh color	150
all-trans-lycopene	15-cis-lycopene	AFC000785	AFC001156	446925	F	66	66	NR	ug/g	cv MSW-28	106
all-trans-lycopene	15-cis-lycopene	AFC000785	AFC001156	446925	F	24.4	24.4	9.1	ug/g	cv LSW-177	113
all-trans-lycopene	15-cis-lycopene	AFC000785	AFC001156	446925	F	29.3	29.3	6.1	ug/g	cv LSW-194	113
all-trans-lycopene	15-cis-lycopene	AFC000785	AFC001156	446925	F	33.6	33.6	9.2	ug/g	data are for Sugar Baby, data for Black Diamond, Dixie Lee, Triple Crown, Allsweet, Tri-X 313 and Sweet Favorite were collected, see ref for details	113
all-trans-lycopene	15-cis-lycopene	AFC000785	AFC001156	446925	F	33.8	33.8	0.33	ug/g	cv Zaojia at 34 days after pollination; grafts on other rootstocks and at other times of fruit maturity are presented, see ref for details	188
all-trans-lycopene	15-cis-lycopene	AFC000785	AFC001156	446925	F	47.16	47.16	5.6	ug/g	cv CN66 at 36 days after pollination; other earlier samples are presented, see ref for details	128
all-trans-lycopene	15-cis-lycopene	AFC000785	AFC001156	446925	F	26.56	26.56	2.6	ug/g	cv CN62 at 36 days after pollination; other earlier samples are presented, see ref for details	128
all-trans-lycopene	15-cis-lycopene	AFC000785	AFC001156	446925	F	48.8	48.8	4	ug/g	cv Calsweet	135
all-trans-lycopene	15-cis-lycopene	AFC000785	AFC001156	446925	F	42.6	42.6	5.3	ug/g	cv Crimson Sweet	135
all-trans-lycopene	15-cis-lycopene	AFC000785	AFC001156	446925	F	38.7	38.7	2.3	ug/g	cv Malali	135
all-trans-lycopene	15-cis-lycopene	AFC000785	AFC001156	446925	F	0.23	0.23	0.06	ug/g	cv cream of Saskatchewan	189
all-trans-lycopene	15-cis-lycopene	AFC000785	AFC001156	446925	F	37.38	37.38	13.24	ug/g	cv LSW-177	189
all-trans-lycopene	15-cis-lycopene	AFC000785	AFC001156	446925	F	2.62	2.62	8.1	ug/g	heterozygous from cream of Saskatchewan and LSW-177	189
all-trans-lycopene	15-cis-lycopene	AFC000785	AFC001156	446925	F	39.84	39.84	NR	g/kg	cv Charleston Gray; data for 7 other cultivars are presented, see ref for details	121
all-trans-lycopene	15-cis-lycopene	AFC000785	AFC001156	446925	F	12.99	12.99	NR	g/kg	cv NC-517; data for 7 other cultivars are presented, see ref for details	121
all-trans-lycopene	15-cis-lycopene	AFC000785	AFC001156	446925	F	59.26	59.26	NR	g/kg	cv Dixielee; data for 7 other cultivars are presented, see ref for details	121
all-trans-lycopene	15-cis-lycopene	AFC000785	AFC001156	446925	F	27.75	27.75	NR	ug/g	cv Zaojia 8424 at a normal potassium level; grafts on other rootstocks and at low potassium are presented, see ref for details	172
all-trans-lycopene	15-cis-lycopene	AFC000785	AFC001156	446925	F	50.54	50.54	8.8	ug/g	data for three other stages of ripening are presented, see ref for details	182
all-trans-nonaprenyl diphosphate		AFC000903	AFC000903	5280650	U						33
all-trans-octaprenyl diphosphate		AFC000904	AFC000904	5280651	U						33
allantoate		AFC000987	AFC000987	5287444	U						33
allantoin		AFC000027	AFC000027	204	S	450	450	NR	ppm		35
allolactose	6-O-beta-D-galactopyranosyl-D-glucopyranose	AFC001106	AFC000719	6454902	U						33
allyl alcohol	2-propenol	AFC000293	AFC000293	7858	U						33
alpha-amino-beta-(1-imidazoyl)-propionic acid		AFC001638	AFC001638	no entry found	V	NR	NR	NR	NR		35
alpha-amyrin		AFC000455	AFC000454	73170	U						33
alpha-carotene		AFC000864	AFC000864	4369188	F	NR	NR	NR	NR		180
alpha-carotene		AFC000864	AFC000864	4369188	J	NR	NR	NR	NR		145
alpha-chamigrene		AFC000738	AFC000738	442351	U						33
alpha-copaene		AFC000382	AFC000382	19725	U						33
alpha-D-altropyranose	alpha-D-altrose	AFC001124	AFC000214	7098663	U						33
alpha-D-galactose		AFC000668	AFC000214	439357	U						33
alpha-D-galactose 1-phosphate		AFC000541	AFC000437	123912	U						33
alpha-D-galacturonate	pectate;pectic acid	AFC001173	AFC001172	11883891	U						33
alpha-D-glucose	alpha-glucose	AFC000464	AFC000214	79025	J	NR	NR	NR	NR		145
alpha-D-glucose	alpha-glucose	AFC000464	AFC000214	79025	U						33
alpha-D-glucose 1-phosphate		AFC000437	AFC000437	123912	U						33
alpha-D-glucose 6-phosphate		AFC000661	AFC000029	439284	U						33
alpha-D-glucuronate		AFC001172	AFC001172	11882235	U						33
alpha-D-glucuronate 1-phosphate		AFC001331	AFC001331	25244365	U						33
alpha-D-mannose		AFC000606	AFC000214	185698	U						33
alpha-D-mannose 1-phosphate		AFC000659	AFC000437	439279	U						33
alpha-D-mannosyl-1,3-(R1)-beta-D-mannosyl-R2		AFC000280	AFC000280	no entry found	U						33
alpha-D-ribose-1-phosphate		AFC000651	AFC000651	439236	U						33
alpha-D-xylopyranose		AFC000229	AFC000229	6027	U						33
alpha-humulene		AFC000945	AFC000945	5281520	U						33
alpha-ionone		AFC000960	AFC000960	5282108	F	NR	NR	NR	NR		180
alpha-ionone		AFC000960	AFC000960	5282108	F	0.001	0.002	NR	ug/kg	several mini-melons sampled	148
alpha-L-arabinofuranose		AFC000778	AFC000778	445935	U						33
alpha-L-fucose		AFC000688	AFC000688	439554	U						33
alpha-L-fucose		AFC000688	AFC000688	439554	F	0.036	0.036	NR	mmol/L	cv Zaojia 8424 at a normal potassium level; grafts on other rootstocks and at low potassium are presented, see ref for details	116
alpha-L-galactose-1-phosphate		AFC001399	AFC000437	46173228	U						33
alpha-maltose		AFC000665	AFC000244	439341	U						33
alpha-N-acetylneuraminyl-(2->3)-beta-D-galactose-(1->3)-(alpha-N-acetylneuraminyl-(2->6))-N-acetyl-D-galactosaminyl-R		AFC000282	AFC000282	no entry found	U						33
alpha-N-acetylneuraminyl-2,3-beta-D-galactosyl-1,4-N-acetyl-D-glucosaminyl-glycoprotein		AFC000281	AFC000281	no entry found	U						33
alpha-tocopherol	Vitamin E (alpha-tocopherol)	AFC000368	AFC000368	14985	F	0.05	0.05	NR	mg/100g		34
alpha-tocopherol	Vitamin E (alpha-tocopherol)	AFC000368	AFC000368	14985	S	34.05	34.05	1.25	mg/kg	values for C. lanatus var. lanatus, see reference for values for var. citroides	132
alpha-tocopherol	Vitamin E (alpha-tocopherol)	AFC000368	AFC000368	14985	S	120.6	195.6	NR	mg/kg		175
alpha-tocopherol	Vitamin E (alpha-tocopherol)	AFC000368	AFC000368	14985	S	NR	NR	NR	NR		108
alpha-tocopherol	Vitamin E (alpha-tocopherol)	AFC000368	AFC000368	14985	U						33
alpha-tocotrienol	zeta1-tocopherol	AFC000967	AFC000967	5282347	F	0.01	0.01	NR	mg/100g		34
alpha-zingiberene		AFC001161	AFC001161	92776	U						33
ammonia		AFC000032	AFC000032	222	U						33
ammonium		AFC000033	AFC000033	223	U						33
anandamide		AFC000955	AFC000955	5281969	U						33
anchusin	shikalkin;shikonine	AFC000209	AFC000209	5208	F	NR	NR	NR	NR		166
androst-4-en-3,17-dione	androstenedione	AFC000240	AFC000240	6128	U						33
antheraxanthin		AFC000929	AFC000929	5281223	F	NR	NR	NR	NR		180
antheraxanthin		AFC000929	AFC000929	5281223	U						33
anthranilate		AFC000034	AFC000034	227	U						33
apigenin		AFC000881	AFC000881	5280443	F	NR	NR	NR	NR	see reference for details	26
apigenin		AFC000881	AFC000881	5280443	U						33
apigenin		AFC000881	AFC000881	5280443	U						3
apigenin 5-O-glucoside		AFC001911	AFC001911	14730806	F	NR	NR	NR	NR	see reference for details	26
apigenin-O-hexoside I	apigenin 7-glucoside;apigetrin;cosmosiin	AFC000907	AFC000907	5280704	F	NR	NR	NR	NR		166
apigenin-O-hexoside I	apigenin 7-glucoside;apigetrin;cosmosiin	AFC000907	AFC000907	5280704	F	NR	NR	NR	NR		144
apigenin-O-hexoside I	apigenin 7-glucoside;apigetrin;cosmosiin	AFC000907	AFC000907	5280704	F	NR	NR	NR	NR	see reference for details	26
apigenin-O-hexoside II		AFC001640	AFC001640	no entry found	F	NR	NR	NR	NR		166
apo-4'-lycopenal		AFC001428	AFC001428	50986183	U						33
apo-4'-lycopenoate		AFC001426	AFC001426	50986065	U						33
arachidic acid	eicosanoic acid	AFC000331	AFC000331	10467	S	0.04	1.19	NR	percent		130
arachidic acid	eicosanoic acid	AFC000331	AFC000331	10467	S	0.3	0.3	NR	percent		133
arachidic acid	eicosanoic acid	AFC000331	AFC000331	10467	S	NR	NR	NR	NR		131
arachidic acid	eicosanoic acid	AFC000331	AFC000331	10467	S	0.2	0.2	NR	percent		114
arachidic acid	eicosanoic acid	AFC000331	AFC000331	10467	S	0.72	0.72	NR	percent	variety Cuban Queen	107
arachidic acid	eicosanoic acid	AFC000331	AFC000331	10467	S	0.29	0.29	0.09	percent	values for C. lanatus var. lanatus, see reference for values for var. citroides, detected with alternate methods	132
arachidic acid	eicosanoic acid	AFC000331	AFC000331	10467	S	NR	NR	NR	NR		108
arachidonate		AFC000766	AFC000766	444899	U						33
arginine		AFC000036	AFC000036	232	F	0.059	0.059	NR	g/100g		34
arginine		AFC000036	AFC000036	232	F	6949	6949	NR	ppm	46600 ppm in seed	35
arginine		AFC000036	AFC000036	232	G	NR	NR	NR	NR		167
arginine		AFC000036	AFC000036	232	J	NR	NR	NR	NR		158
arginine		AFC000036	AFC000036	232	J	NR	NR	NR	NR		145
arginine		AFC000036	AFC000036	232	L	NR	NR	NR	NR	assayed under various conditions	154
arginine		AFC000036	AFC000036	232	S	9	9	NR	g/100g protein		98
arginine		AFC000036	AFC000036	232	S	11.3	11.3	0.7	mg/100 kcal	In flesh, 6.5 ± 0.6 and in rind 3.7 ± 0.5	144
arginine		AFC000036	AFC000036	232	T	NR	NR	NR	NR	several cultivars sampled	170
arginine		AFC000036	AFC000036	232	F	0.61	1.12	NR	ug/g	cv Charleston Gray; data for 7 other cultivars are presented, see ref for details	121
arginine		AFC000036	AFC000036	232	F	2	2	NR	mmol/L	cv Zaojia 8424 at a normal potassium level; grafts on other rootstocks and at low potassium are presented, see ref for details	116
arsenate		AFC000392	AFC000392	24500	U						33
arsenite		AFC000759	AFC000759	443495	U						33
ascorbic acid	L-ascorbate;ascorbate;total vitamin C	AFC001445	AFC001445	54670067	F	8.1	8.1	NR	mg/100g		34
ascorbic acid	L-ascorbate;ascorbate;total vitamin C	AFC001445	AFC001445	54670067	F	8.1	8.1	NR	mg/100g		180
ascorbic acid	L-ascorbate;ascorbate;total vitamin C	AFC001445	AFC001445	54670067	F	63.8	95.6	NR	mg/kg		110
ascorbic acid	L-ascorbate;ascorbate;total vitamin C	AFC001445	AFC001445	54670067	F	94	94	NR	ppm		35
ascorbic acid	L-ascorbate;ascorbate;total vitamin C	AFC001445	AFC001445	54670067	J	NR	NR	NR	NR		158
ascorbic acid	L-ascorbate;ascorbate;total vitamin C	AFC001445	AFC001445	54670067	J	NR	NR	NR	NR		145
ascorbic acid	L-ascorbate;ascorbate;total vitamin C	AFC001445	AFC001445	54670067	U						33
ascorbic acid	L-ascorbate;ascorbate;total vitamin C	AFC001445	AFC001445	54670067	F	45.27	45.27	NR	ug/g	cv Zaojia 8424 at a normal potassium level; grafts on other rootstocks and at low potassium are presented, see ref for details	172
asparagine		AFC000037	AFC000037	236	L	NR	NR	NR	NR	assayed under various conditions	154
asparagine		AFC000037	AFC000037	236	T	NR	NR	NR	NR	several cultivars sampled	170
asparagine		AFC000037	AFC000037	236	F	0.183	0.183	NR	mmol/L	cv Zaojia 8424 at a normal potassium level; grafts on other rootstocks and at low potassium are presented, see ref for details	116
aspartic acid	aspartate;L-aspartic acid;L-aspartate	AFC000223	AFC000223	5960	F	0.039	0.039	NR	g/100g		34
aspartic acid	aspartate;L-aspartic acid;L-aspartate	AFC000223	AFC000223	5960	F	NR	NR	NR	NR		180
aspartic acid	aspartate;L-aspartic acid;L-aspartate	AFC000223	AFC000223	5960	F	4594	4594	NR	ppm	25500 ppm in seed	35
aspartic acid	aspartate;L-aspartic acid;L-aspartate	AFC000223	AFC000223	5960	F	NR	NR	NR	NR	see reference for details	26
aspartic acid	aspartate;L-aspartic acid;L-aspartate	AFC000223	AFC000223	5960	G	NR	NR	NR	NR		167
aspartic acid	aspartate;L-aspartic acid;L-aspartate	AFC000223	AFC000223	5960	J	NR	NR	NR	NR		145
aspartic acid	aspartate;L-aspartic acid;L-aspartate	AFC000223	AFC000223	5960	L	NR	NR	NR	NR	assayed under various conditions	154
aspartic acid	aspartate;L-aspartic acid;L-aspartate	AFC000223	AFC000223	5960	S	16.3	16.3	NR	g/100g protein		98
aspartic acid	aspartate;L-aspartic acid;L-aspartate	AFC000223	AFC000223	5960	U						33
aspartic acid	aspartate;L-aspartic acid;L-aspartate	AFC000223	AFC000223	5960	V	NR	NR	NR	NR	detected in phloem exudate	155
aspartic acid	aspartate;L-aspartic acid;L-aspartate	AFC000223	AFC000223	5960	F	0.614	0.614	NR	mmol/L	cv Zaojia 8424 at a normal potassium level; grafts on other rootstocks and at low potassium are presented, see ref for details	116
aspartyl adenylate	adenylosuccinic acid;adenylosuccinate;succinyl AMP	AFC000787	AFC000787	447145	U						33
ATP		AFC000222	AFC000222	5957	U						33
avenastenone		AFC001518	AFC001518	102515167	U						33
azelaic acid		AFC000197	AFC000197	2266	H	NR	NR	NR	NR		178
baohuoside I	icariside II	AFC001074	AFC001074	5488822	F	NR	NR	NR	NR		166
behenate	docosanoate	AFC001062	AFC001062	5460660	U						33
benzaldehyde		AFC000039	AFC000039	240	F	1.1	1.1	NR	ng/g	C. vulgaris Schrad	163
benzaldehyde		AFC000039	AFC000039	240	F	0.001	0.003	NR	ug/kg	several mini-melons sampled	148
benzaldehyde		AFC000039	AFC000039	240	J	NR	NR	NR	NR		159
benzaldehyde		AFC000039	AFC000039	240	J	NR	NR	NR	NR		146
benzaldehyde		AFC000039	AFC000039	240	J	NR	NR	NR	NR		35
benzaldehyde		AFC000039	AFC000039	240	U						33
benzaldehyde		AFC000039	AFC000039	240	U						3
benzaldehyde		AFC000039	AFC000039	240	F	3.4	3.4	NR	mg/100 g	cv F1 Oneida; grafts onto citron rootstocks were performed, see ref for details	187
benzamidine		AFC001843	AFC001843	2332	F	NR	NR	NR	NR	see reference for details	26
benzoate		AFC000040	AFC000040	242	U						33
benzoic acid		AFC001837	AFC001837	243	G	NR	NR	NR	NR	see reference for details on strains Calhoun Grey, Charleston Gray, PI-296341 and Sugar Baby	125
benzoyl-CoA		AFC001128	AFC001128	9543169	U						33
benzoylsuccinyl-CoA		AFC000739	AFC000739	442449	U						33
benzyl alcohol	phenylmethanol	AFC000041	AFC000041	244	F	25.52	25.52	NR	ug/kg	cv Proteo ungrafted watermelon	173
benzyl alcohol	phenylmethanol	AFC000041	AFC000041	244	F	1.6	1.6	NR	ng/g	C. vulgaris Schrad	163
benzyl alcohol	phenylmethanol	AFC000041	AFC000041	244	F	NR	NR	NR	NR		152
benzyl alcohol	phenylmethanol	AFC000041	AFC000041	244	J	NR	NR	NR	NR		159
benzyl alcohol	phenylmethanol	AFC000041	AFC000041	244	J	NR	NR	NR	NR		35
benzyl alcohol	phenylmethanol	AFC000041	AFC000041	244	U						33
benzyl alcohol	phenylmethanol	AFC000041	AFC000041	244	U						3
benzyl alcohol	phenylmethanol	AFC000041	AFC000041	244	F	16.6	16.6	NR	mg/100 g	cv F1 Oneida; grafts onto citron rootstocks were performed, see ref for details	187
benzyl β-D-glucoside	GKHCBYYBLTXYEV-UHFFFAOYSA-N	AFC001810	AFC001810	4984739	U						3
benzylbenzoate		AFC000198	AFC000198	2345	U						33
beta-(pyrazole-1-yl)-L-alanine	L-beta-(pyrazol-1-yl)-alanine	AFC000562	AFC000562	151491	F,S	NR	NR	NR	NR		35
beta-(pyrazole-1-yl)-L-alanine	L-beta-(pyrazol-1-yl)-alanine	AFC000562	AFC000562	151491	G	NR	NR	NR	NR		139
beta-(pyrazole-1-yl)-L-alanine	L-beta-(pyrazol-1-yl)-alanine	AFC000562	AFC000562	151491	S	NR	NR	NR	NR	variety Tom Watson	186
beta-acoradiene	(1R)-1,8-dimethyl-4-prop-1-en-2-ylspiro[4.5]dec-8-ene	AFC000998	AFC000998	5316209	U						33
beta-alanine		AFC000038	AFC000038	239	U						33
beta-alanine		AFC000038	AFC000038	239	F	0.063	0.063	NR	mmol/L	cv Zaojia 8424 at a normal potassium level; grafts on other rootstocks and at low potassium are presented, see ref for details	116
beta-amyrin		AFC000454	AFC000454	73145	U						33
beta-bisabolol		AFC001194	AFC001194	27208	F	NR	0.001	NR	ug/kg	several mini-melons sampled	148
beta-carotene		AFC000885	AFC000864	5280489	F	57.63	57.63	4.77	ug/100g		185
beta-carotene		AFC000885	AFC000864	5280489	F	303	303	NR	ug/100g		34
beta-carotene		AFC000885	AFC000864	5280489	F	1.2	10.2	NR	mg/kg		180
beta-carotene		AFC000885	AFC000864	5280489	F	108.6	108.6	4.2	ug/100g		161
beta-carotene		AFC000885	AFC000864	5280489	F	0.2	10.8	1.6	ng/g		120
beta-carotene		AFC000885	AFC000864	5280489	F	0.35	1.06	NR	ug/g	3 cultivars sampled	169
beta-carotene		AFC000885	AFC000864	5280489	F	2	48	NR	ppm		35
beta-carotene		AFC000885	AFC000864	5280489	U						33
beta-carotene		AFC000885	AFC000864	5280489	U						36
beta-carotene		AFC000885	AFC000864	5280489	U						122
beta-carotene		AFC000885	AFC000864	5280489	F	trace	NR	NR	NR	canary yellow flesh color	150
beta-carotene		AFC000885	AFC000864	5280489	F	trace	NR	NR	NR	pale yellow flesh color	150
beta-carotene		AFC000885	AFC000864	5280489	F	1.42	1.42	0.6	ug/g	data for three other stages of ripening are presented, see ref for details	182
beta-carotene		AFC000885	AFC000864	5280489	F	154.75	154.75	15.28	ug/g dw	cv Lizhiguan; data for 11 other cultivars are presented, see ref for details	126
beta-carotene		AFC000885	AFC000864	5280489	F	1.6	1.6	0.1	ug/g	cv CN66 at 36 days after pollination; other earlier samples are presented, see ref for details	128
beta-carotene		AFC000885	AFC000864	5280489	F	0.77	0.77	0.08	ug/g	cv CN62 at 36 days after pollination; other earlier samples are presented, see ref for details	128
beta-carotene		AFC000885	AFC000864	5280489	F	1.7	1.7	0.5	ug/g	cv Calsweet	135
beta-carotene		AFC000885	AFC000864	5280489	F	trace	NR	NR	ug/g	cv Early Moonbeam	135
beta-carotene		AFC000885	AFC000864	5280489	F	0.2	0.2	0.1	ug/g	cv Orangelo	135
beta-carotene		AFC000885	AFC000864	5280489	F	trace	NR	NR	ug/g	cv Crimson Sweet	135
beta-carotene		AFC000885	AFC000864	5280489	F	5.2	5.2	1.5	ug/g	cv Malali	135
beta-carotene		AFC000885	AFC000864	5280489	F	0.71	0.71	NR	ug/g	cv Zaojia 8424 at a normal potassium level; grafts on other rootstocks and at low potassium are presented, see ref for details	172
beta-cryptoxanthin		AFC000932	AFC000932	5281235	F	1.22	1.22	0.53	ug/100g		185
beta-cryptoxanthin		AFC000932	AFC000932	5281235	F	78	78	NR	ug/100g		34
beta-cryptoxanthin		AFC000932	AFC000932	5281235	U						36
beta-cryptoxanthin		AFC000932	AFC000932	5281235	U						122
beta-cryptoxanthin		AFC000932	AFC000932	5281235	F	trace	NR	NR	NR	pale yellow flesh color	150
beta-cyclocitral		AFC000324	AFC000324	9895	F	4.7	4.7	1.5	ug/kg	variety Rugby, see reference for values in unripe and overripe fruit	142
beta-cyclocitral		AFC000324	AFC000324	9895	F	11.16	11.16	NR	ug/kg	cv Proteo ungrafted watermelon	173
beta-cyclocitral		AFC000324	AFC000324	9895	F	1.1	1.1	NR	ng/g	C. vulgaris Schrad	163
beta-cyclocitral		AFC000324	AFC000324	9895	F	NR	NR	NR	NR		180
beta-cyclocitral		AFC000324	AFC000324	9895	F	NR	NR	NR	NR		120
beta-cyclocitral		AFC000324	AFC000324	9895	F	NR	0.001	NR	ug/kg	several mini-melons sampled	148
beta-cyclocitral		AFC000324	AFC000324	9895	H	NR	NR	NR	NR		190
beta-cyclocitral		AFC000324	AFC000324	9895	J	NR	NR	NR	NR		146
beta-cyclocitral		AFC000324	AFC000324	9895	F	1.2	1.2	NR	mg/100 g	cv F1 Oneida; grafts onto citron rootstocks were performed, see ref for details	187
beta-cyclocitral		AFC000324	AFC000324	9895	F	2	2	NR	ng/g	cv Royal Armada fresh fruit; other samples include stored fruit, see ref for details	117
beta-D-altropyranose	beta-D-altrose	AFC000793	AFC000214	448702	U						33
beta-D-fructofuranose		AFC000697	AFC000697	439709	U						33
beta-D-fructose 2,6-bisphosphate		AFC000507	AFC000507	105021	U						33
beta-D-galactopyranuronic acid	pectin, soluble fiber	AFC000736	AFC000497	441476	F	NR	NR	NR	NR		35
beta-D-galactopyranuronic acid	pectin, soluble fiber	AFC000736	AFC000497	441476	S	NR	NR	NR	NR		181
beta-D-galactose		AFC000667	AFC000214	439353	U						33
beta-D-glucopyranoside, 2-(hydroxymethyl)phenyl	saligenin glucopyranoside;salicin	AFC000208	AFC000208	5145	F	NR	NR	NR	NR		166
beta-D-glucopyranosyl abscisate		AFC001405	AFC001405	46173811	U						33
beta-D-glucose	beta-glucose	AFC000424	AFC000214	64689	J	NR	NR	NR	NR		145
beta-D-glucose	beta-glucose	AFC000424	AFC000214	64689	U						33
beta-D-glucose 1-phosphate		AFC000530	AFC000437	122250	U						33
beta-D-glucose-6-phosphate		AFC000676	AFC000029	439427	U						33
beta-D-mannose		AFC000695	AFC000214	439680	U						33
beta-D-ribofuranose		AFC000789	AFC000778	447347	U						33
beta-D-xylopyranose		AFC000545	AFC000229	125409	U						33
beta-elemene		AFC001116	AFC001116	6918391	U						33
beta-fructose-1,6-diphosphate	beta-D-fructose 1,6-bisphosphate;	AFC000327	AFC000327	10267	F	NR	NR	NR	NR	see reference for details	26
beta-fructose-1,6-diphosphate	beta-D-fructose 1,6-bisphosphate;	AFC000327	AFC000327	10267	U						33
beta-ionone		AFC000811	AFC000811	638014	F	29	29	18	ug/kg	variety Rugby, see reference for values in unripe and overripe fruit	142
beta-ionone		AFC000811	AFC000811	638014	F	5.47	5.47	NR	ug/kg	cv Proteo ungrafted watermelon	173
beta-ionone		AFC000811	AFC000811	638014	F	2.6	2.6	NR	ng/g	C. vulgaris Schrad	163
beta-ionone		AFC000811	AFC000811	638014	F	NR	NR	NR	NR		180
beta-ionone		AFC000811	AFC000811	638014	F	0	38	2	ng/g		120
beta-ionone		AFC000811	AFC000811	638014	F	NR	0.001	NR	ug/kg	several mini-melons sampled	148
beta-ionone		AFC000811	AFC000811	638014	F,J	NR	NR	NR	NR		35
beta-ionone		AFC000811	AFC000811	638014	H	NR	NR	NR	NR		190
beta-ionone		AFC000811	AFC000811	638014	J	NR	NR	NR	NR		146
beta-ionone		AFC000811	AFC000811	638014	U						3
beta-ionone		AFC000811	AFC000811	638014	F	4	4	NR	mg/100 g	cv F1 Oneida; grafts onto citron rootstocks were performed, see ref for details	187
beta-ionone		AFC000811	AFC000811	638014	J	9.52	9.52	16.49	ug/L	cv Exigua 13; data for 11 other cultivars are presented, see ref for details	126
beta-ionone epoxide		AFC001007	AFC001007	5352481	J	NR	NR	NR	NR		35
beta-L-arabinose 1-phosphate		AFC000706	AFC000706	440160	U						33
beta-L-galactopyranose	beta-L-galactose;L-galactose	AFC001119	AFC000214	6971007	F	NR	NR	NR	NR		180
beta-L-galactopyranose	beta-L-galactose;L-galactose	AFC001119	AFC000214	6971007	U						33
beta-myrcene	7-methyl-3-methylene-1,6-octadiene	AFC000408	AFC000408	31253	U						33
beta-sesquiphellandrene		AFC001199	AFC001199	12315492	U						33
beta-sitosterol	sitosterol	AFC000623	AFC000623	222284	F	10	10	NR	ppm		35
beta-sitosterol	sitosterol	AFC000623	AFC000623	222284	S	77	77	NR	mg/100g		130
beta-sitosterol	sitosterol	AFC000623	AFC000623	222284	S	55.45	55.45	0.98	mg/100g	values for C. lanatus var. lanatus, see reference for values for var. citroides, detected with alternate methods	132
beta-sitosterol	sitosterol	AFC000623	AFC000623	222284	U						33
beta-tocopherol		AFC001115	AFC001115	6857447	U						33
betaine	glycine betaine	AFC000042	AFC000042	247	F	0.3	0.3	NR	mg/100g		34
betaine	glycine betaine	AFC000042	AFC000042	247	F	NR	NR	NR	NR	see reference for details	26
betaine	glycine betaine	AFC000042	AFC000042	247	T	NR	NR	NR	NR	several cultivars sampled	170
betaine	glycine betaine	AFC000042	AFC000042	247	U						33
betaine aldehyde		AFC000043	AFC000043	249	U						33
betaine aldehyde hydrate		AFC001086	AFC001086	6395359	U						33
bicarbonate		AFC000103	AFC000103	769	U						33
bilirubin		AFC000871	AFC000871	5280352	U						33
biliverdin-IX-alpha		AFC001101	AFC001101	6443316	U						33
biotin		AFC000598	AFC000598	171548	F	NR	NR	NR	NR	see reference for details	26
biotin		AFC000598	AFC000598	171548	U						33
bisulfite		AFC000506	AFC000506	104748	U						33
Bo-Xan	xanthophyll;all-trans-lutein	AFC001946	AFC001946	5368396	F	0.17	0.17	0.3	ug/g dw	cv Lizhiguan; data for 11 other cultivars are presented, see ref for details	126
boron		AFC001071	AFC001071	5462311	F	1	4	NR	ppm		35
brassicasterol		AFC000940	AFC000940	5281327	U						33
bryoamaride		AFC001786	AFC001786	44406496	U						3
bryonolal		AFC001641	AFC001235	no entry found	L	NR	NR	NR	NR		136
bryonolal		AFC001641	AFC001235	no entry found	U					cell culture	123
bryonolic acid	bryononic acid	AFC000568	AFC000568	159970	L	15.2	15.2	NR	mg/g dwt		136
bryonolic acid	bryononic acid	AFC000568	AFC000568	159970	R	0.2	0.2	NR	mg/g dwt	Matsum. et Nakai cv Zuisho	168
bryonolic acid	bryononic acid	AFC000568	AFC000568	159970	U						3
bryonolic acid	bryononic acid	AFC000568	AFC000568	159970	U					cell culture	123
bryonolic acid	bryononic acid	AFC000568	AFC000568	159970	V	NR	NR	NR	NR		35
bryonolol		AFC001235	AFC001235	15756408	L	NR	NR	NR	NR		136
bryonolol		AFC001235	AFC001235	15756408	U						3
bryonolol		AFC001235	AFC001235	15756408	U					cell culture	123
but-1-en-3-one	methyl vinyl ketone	AFC000266	AFC000266	6570	U						33
butan-2-one	methyl ethyl ketone	AFC000265	AFC000265	6569	U						33
butan-2-one	methyl ethyl ketone	AFC000265	AFC000265	6569	F	9	9	NR	ng/g	cv Royal Armada fresh fruit; other samples include stored fruit, see ref for details	117
butanal	butyraldehyde	AFC000044	AFC000044	261	U						33
butane-2,3-diyl diacetate	butanedioldiacetate	AFC000439	AFC000439	66193	H	NR	NR	NR	NR		178
butanoyl-CoA	butyryl-CoA	AFC000531	AFC000531	122283	U						33
Ca2+	calcium	AFC000046	AFC000046	271	F	7	7	NR	mg/100g		34
Ca2+	calcium	AFC000046	AFC000046	271	F,S	100	3400	NR	ppm	1294-1300 ppm in seed	35
Ca2+	calcium	AFC000046	AFC000046	271	P	468	468	0.12	mg/100g		137
Ca2+	calcium	AFC000046	AFC000046	271	S	28.2	28.2	0.2	g/100g protein		98
Ca2+	calcium	AFC000046	AFC000046	271	U						33
Ca2+	calcium	AFC000046	AFC000046	271	L	61.904	61.904	NR	mg/g dw	data are for Zaojia 8424 at fruit maturation; grafts onto rootstocks Jingxinzhen 1 and Qingyanzhen 1 were performed, see ref for details	151
Ca2+	calcium	AFC000046	AFC000046	271	R	6.938	6.938	NR	mg/g dw	data are for Zaojia 8424 at fruit maturation; grafts onto rootstocks Jingxinzhen 1 and Qingyanzhen 1 were performed, see ref for details	151
Ca2+	calcium	AFC000046	AFC000046	271	V	15.658	15.658	NR	mg/g dw	data are for Zaojia 8424 at fruit maturation; grafts onto rootstocks Jingxinzhen 1 and Qingyanzhen 1 were performed, see ref for details	151
Ca2+	calcium	AFC000046	AFC000046	271	S	0.16	0.16	0.02	percent	cv Charleston Gray	109
Ca2+	calcium	AFC000046	AFC000046	271	S	0.11	0.11	0.01	percent	cv Crimson Sweet	109
Ca2+	calcium	AFC000046	AFC000046	271	S	0.14	0.14	0.03	percent	cv Black Diamond	109
cadaverine		AFC000047	AFC000047	273	U						33
cadmium ion	Cd2+	AFC000407	AFC000407	31193	U						33
caffeic acid		AFC000836	AFC000836	689043	F	NR	NR	NR	NR		180
caffeic acid		AFC000836	AFC000836	689043	F	NR	NR	NR	NR	see reference for details	26
caffeic acid		AFC000836	AFC000836	689043	G	NR	NR	NR	NR	see reference for details on strains Calhoun Grey, Charleston Gray, PI-296341 and Sugar Baby	125
caffeic acid		AFC000836	AFC000836	689043	R	18.01	135.42	NR	ug/g		140
caffeic acid		AFC000836	AFC000836	689043	S	24.223	24.223	NR	ug/ml		147
caffeic acid		AFC000836	AFC000836	689043	S	NR	NR	NR	NR		35
caffeine	1,3,7-trimethylxanthine;guaranine	AFC001873	AFC001873	12599	F	NR	NR	NR	NR	see reference for details	26
caffeoyl-CoA		AFC001181	AFC001181	11966126	U						33
caffeoyl-glucose		AFC001540	AFC001540	129888613	L	2438	2438	NR	ug/g	cv Charleston Gray	157
caffeoylhexose		AFC001642	AFC001642	no entry found	F,R,S	3.9	3.9	3.6	ug/100g	detected in rind 4.8±1.6; detected in seed 423.3±62.9	144
caffeoylhexose I	1-caffeoyl-beta-D-glucose	AFC001643	AFC001643	5281761	F	NR	NR	NR	NR		166
calodendroside A	taxifolin dihexoside	AFC001510	AFC001510	101030299	F	NR	NR	NR	NR		166
campestanol		AFC000522	AFC000522	119394	S	4	4	NR	mg/100g		130
campesterol		AFC000601	AFC000601	173183	F,S	NR	NR	NR	NR	detected in seed oil	35
campesterol		AFC000601	AFC000601	173183	S	15	208	NR	mg/100g		130
campesterol		AFC000601	AFC000601	173183	S	0.57	0.57	0.11	mg/100g	values for C. lanatus var. lanatus, see reference for values for var. citroides, detected with alternate methods	132
campesterol		AFC000601	AFC000601	173183	U						33
campesterol		AFC000601	AFC000601	173183	U						3
camptothecin		AFC000390	AFC000390	24360	U						33
canaline	L-canaline	AFC000735	AFC000735	441443	U						33
canavaninosuccinate		AFC001307	AFC001307	25201068	U						33
carbamate		AFC000048	AFC000048	276	U						33
carbamoyl-phosphate		AFC000049	AFC000049	278	U						33
carbon dioxide	CO2	AFC000050	AFC000050	280	U						33
carbon monoxide		AFC000051	AFC000051	281	U						33
carbonic acid		AFC000101	AFC000101	767	U						33
carboxyaminoimidazole ribotide	5-amino-1-(5-phospho-D-ribosyl)imidazole-4-carboxylate	AFC000590	AFC000590	165388	U						33
carnitine		AFC001857	AFC001857	288	F	NR	NR	NR	NR	see reference for details	26
catalposide		AFC000491	AFC000491	93039	F	NR	NR	NR	NR		166
catechin	cianidanol	AFC001894	AFC001894	9064	F	NR	NR	NR	NR	see reference for details	26
catechol		AFC000054	AFC000054	289	U						33
CDP		AFC000242	AFC000242	6132	F	NR	NR	NR	NR	see reference for details	26
CDP		AFC000242	AFC000242	6132	U						33
CDP-choline	citicholine	AFC000365	AFC000365	13804	U						33
CDP-ethanolamine		AFC000539	AFC000539	123727	U						33
cellulase		AFC000729	AFC000690	440950	R	NR	NR	NR	NR		111
cellulose		AFC001442	AFC000244	16211032	S	NR	NR	NR	NR		181
chenodeoxycholoyl-CoA		AFC001187	AFC001187	11966205	U						33
chitotriose		AFC001482	AFC001482	90472500	U						33
chloride		AFC000057	AFC000057	312	U						33
chloroacetate		AFC000798	AFC000798	518964	U						33
chlorogenic acid		AFC000848	AFC000848	1794427	F	0.58	0.58	0.01	mg/100g		160
chlorogenic acid		AFC000848	AFC000848	1794427	F	NR	NR	NR	NR		180
chlorogenic acid		AFC000848	AFC000848	1794427	G	NR	NR	NR	NR	see reference for details on strains Calhoun Grey, Charleston Gray, PI-296341 and Sugar Baby	125
chlorogenic acid		AFC000848	AFC000848	1794427	R	115.6	1611.04	NR	ug/g		140
chlorogenic acid		AFC000848	AFC000848	1794427	Y	0.91	0.91	0.01	mg/100g		160
chlorophyll a	chlorophyll	AFC001193	AFC001193	12085802	U						33
chlorophyll b		AFC001166	AFC001166	11593175	U						33
chlorophyllide a		AFC000693	AFC000693	439664	U						33
chlorophyllide b		AFC001236	AFC001236	15775275	U						33
cholest-4-en-3-one		AFC000471	AFC000471	91477	U						33
cholest-5-en-3-one		AFC001143	AFC001143	9908107	U						33
cholesterol		AFC000227	AFC000227	5997	S	0.13	0.13	0.01	mg/100g	values for C. lanatus var. lanatus, see reference for values for var. citroides, detected with alternate methods	132
cholesterol		AFC000227	AFC000227	5997	U						33
choline	total choline	AFC000055	AFC000055	305	F	4.1	4.1	NR	mg/100g		34
choline	total choline	AFC000055	AFC000055	305	F	NR	NR	NR	NR	see reference for details	26
choline	total choline	AFC000055	AFC000055	305	T	NR	NR	NR	NR	several cultivars sampled	170
choline	total choline	AFC000055	AFC000055	305	U						33
choline	total choline	AFC000055	AFC000055	305	F	0.17	0.17	NR	mmol/L	cv Zaojia 8424 at a normal potassium level; grafts on other rootstocks and at low potassium are presented, see ref for details	116
choloyl-CoA		AFC000826	AFC000826	644071	U						33
chorismate		AFC000348	AFC000348	12039	U						33
chrysin		AFC001885	AFC001885	5281607	F	NR	NR	NR	NR	see reference for details	26
chrysoeriol C-hexoside		AFC001916	AFC001916	137333728	F	NR	NR	NR	NR	see reference for details	26
chrysoeriol-O-hexoside I	chrysoeriol 7-glucuronide	AFC001645	AFC001645	14630703	F	NR	NR	NR	NR		166
chrysoeriol-O-hexoside I	chrysoeriol 7-glucuronide	AFC001645	AFC001645	14630703	F,R	439.9	439.9	37.1	ug/100g	values are for rind	144
chrysoeriol-O-hexoside II	chrysoeriol 4'-O-beta-D-glucopyranoside	AFC001646	AFC001646	14406834	F	NR	NR	NR	NR		166
chrysoeriol-O-hexoside II	chrysoeriol 4'-O-beta-D-glucopyranoside	AFC001646	AFC001646	14406834	F,R,S	70.2	70.2	10.6	ug/100g	values are for seed	144
cimifugin		AFC000737	AFC000737	441960	F	NR	NR	NR	NR		166
cinnamaldehyde		AFC000804	AFC000804	637511	F	NR	0.001	NR	ug/kg	several mini-melons sampled	148
cinnamaldehyde		AFC000804	AFC000804	637511	U						33
cinnamic acid	trans-cinnamate;trans-cinnamic acid	AFC000765	AFC000765	444539	F	NR	NR	NR	NR		180
cinnamic acid	trans-cinnamate;trans-cinnamic acid	AFC000765	AFC000765	444539	G	NR	NR	NR	NR	see reference for details on strains Calhoun Grey, Charleston Gray, PI-296341 and Sugar Baby	125
cinnamic acid	trans-cinnamate;trans-cinnamic acid	AFC000765	AFC000765	444539	U						33
cinnamoyltyramine		AFC000997	AFC000997	5315911	U						33
cinnamyl alcohol	(2E)-3-phenylprop-2-en-1-ol;3-phenyl-2-propen-1-ol	AFC000996	AFC000996	5315892	F	NR	NR	NR	NR		152
cinnamyl alcohol	(2E)-3-phenylprop-2-en-1-ol;3-phenyl-2-propen-1-ol	AFC000996	AFC000996	5315892	J	NR	NR	NR	NR		35
cinnamyl alcohol	(2E)-3-phenylprop-2-en-1-ol;3-phenyl-2-propen-1-ol	AFC000996	AFC000996	5315892	U						33
cinnamyl alcohol	(2E)-3-phenylprop-2-en-1-ol;3-phenyl-2-propen-1-ol	AFC000996	AFC000996	5315892	U						3
cis-2-penten-1-ol	pent-cis-2-en-1-ol;(Z)-2-penten-1-ol	AFC001024	AFC001024	5364919	F	NR	NR	NR	NR		152
cis-2-penten-1-ol	pent-cis-2-en-1-ol;(Z)-2-penten-1-ol	AFC001024	AFC001024	5364919	F,J	NR	NR	NR	NR		159
cis-2-penten-1-ol	pent-cis-2-en-1-ol;(Z)-2-penten-1-ol	AFC001024	AFC001024	5364919	H	NR	NR	NR	NR		190
cis-2-penten-1-ol	pent-cis-2-en-1-ol;(Z)-2-penten-1-ol	AFC001024	AFC001024	5364919	J	NR	NR	NR	NR		35
cis-2-penten-1-ol	pent-cis-2-en-1-ol;(Z)-2-penten-1-ol	AFC001024	AFC001024	5364919	F	23	23	NR	ng/g	cv Royal Armada fresh fruit; other samples include stored fruit, see ref for details	117
cis-3-hexen-1-ol	(3Z)-hex-3-en-ol;(Z)-hex-3-en-1-ol;(Z)-3-hexenol;(Z)-3-hexen-1-ol;3-hexen-1-ol	AFC000927	AFC000927	5281167	F	4	4	2	ug/kg	variety Rugby, see reference for values in unripe and overripe fruit	142
cis-3-hexen-1-ol	(3Z)-hex-3-en-ol;(Z)-hex-3-en-1-ol;(Z)-3-hexenol;(Z)-3-hexen-1-ol;3-hexen-1-ol	AFC000927	AFC000927	5281167	F	NR	NR	NR	NR		180
cis-3-hexen-1-ol	(3Z)-hex-3-en-ol;(Z)-hex-3-en-1-ol;(Z)-3-hexenol;(Z)-3-hexen-1-ol;3-hexen-1-ol	AFC000927	AFC000927	5281167	F	NR	NR	NR	NR		111
cis-3-hexen-1-ol	(3Z)-hex-3-en-ol;(Z)-hex-3-en-1-ol;(Z)-3-hexenol;(Z)-3-hexen-1-ol;3-hexen-1-ol	AFC000927	AFC000927	5281167	F	0.004	0.02	NR	ug/kg	several mini-melons sampled	148
cis-3-hexen-1-ol	(3Z)-hex-3-en-ol;(Z)-hex-3-en-1-ol;(Z)-3-hexenol;(Z)-3-hexen-1-ol;3-hexen-1-ol	AFC000927	AFC000927	5281167	F	NR	NR	NR	NR		152
cis-3-hexen-1-ol	(3Z)-hex-3-en-ol;(Z)-hex-3-en-1-ol;(Z)-3-hexenol;(Z)-3-hexen-1-ol;3-hexen-1-ol	AFC000927	AFC000927	5281167	J	NR	NR	NR	NR		159
cis-3-hexen-1-ol	(3Z)-hex-3-en-ol;(Z)-hex-3-en-1-ol;(Z)-3-hexenol;(Z)-3-hexen-1-ol;3-hexen-1-ol	AFC000927	AFC000927	5281167	J	NR	NR	NR	NR		146
cis-3-hexen-1-ol	(3Z)-hex-3-en-ol;(Z)-hex-3-en-1-ol;(Z)-3-hexenol;(Z)-3-hexen-1-ol;3-hexen-1-ol	AFC000927	AFC000927	5281167	J	NR	NR	NR	NR		35
cis-3-hexen-1-ol	(3Z)-hex-3-en-ol;(Z)-hex-3-en-1-ol;(Z)-3-hexenol;(Z)-3-hexen-1-ol;3-hexen-1-ol	AFC000927	AFC000927	5281167	U						33
cis-3-hexen-1-ol	(3Z)-hex-3-en-ol;(Z)-hex-3-en-1-ol;(Z)-3-hexenol;(Z)-3-hexen-1-ol;3-hexen-1-ol	AFC000927	AFC000927	5281167	F	23.5	23.5	NR	mg/100 g	cv F1 Oneida; grafts onto citron rootstocks were performed, see ref for details	187
cis-3-hexen-1-ol	(3Z)-hex-3-en-ol;(Z)-hex-3-en-1-ol;(Z)-3-hexenol;(Z)-3-hexen-1-ol;3-hexen-1-ol	AFC000927	AFC000927	5281167	F	43	43	NR	ng/g	cv Royal Armada fresh fruit; other samples include stored fruit, see ref for details	117
cis-3-hexenal	(Z)-3-hexenal	AFC000821	AFC000386	643941	F	NR	NR	NR	NR		180
cis-3-hexenal	(Z)-3-hexenal	AFC000821	AFC000386	643941	U						33
cis-3-hexenyl acetate	(Z)-3-hexenyl acetate;(Z)-hex-3-enyl acetate;(3Z)-3-hexenyl acetate	AFC001830	AFC001830	5363388	F	0.6	0.6	NR	ng/g	C. vulgaris Schrad	163
cis-3-nonen-1-ol	(Z)-3-nonen-1-ol;non-cis-3-en-1-ol;(Z)-3-nonenol	AFC001022	AFC001022	5364631	F	0.099	9.61	NR	ug/kg		159
cis-3-nonen-1-ol	(Z)-3-nonen-1-ol;non-cis-3-en-1-ol;(Z)-3-nonenol	AFC001022	AFC001022	5364631	F	0.099	9.61	NR	ug/kg	cv Proteo ungrafted watermelon	173
cis-3-nonen-1-ol	(Z)-3-nonen-1-ol;non-cis-3-en-1-ol;(Z)-3-nonenol	AFC001022	AFC001022	5364631	F	2043.9	2043.9	NR	ng/g	C. vulgaris Schrad	163
cis-3-nonen-1-ol	(Z)-3-nonen-1-ol;non-cis-3-en-1-ol;(Z)-3-nonenol	AFC001022	AFC001022	5364631	F	0	1.2		percent VOC		171
cis-3-nonen-1-ol	(Z)-3-nonen-1-ol;non-cis-3-en-1-ol;(Z)-3-nonenol	AFC001022	AFC001022	5364631	F	NR	NR	NR	NR		180
cis-3-nonen-1-ol	(Z)-3-nonen-1-ol;non-cis-3-en-1-ol;(Z)-3-nonenol	AFC001022	AFC001022	5364631	F	NR	NR	NR	NR		111
cis-3-nonen-1-ol	(Z)-3-nonen-1-ol;non-cis-3-en-1-ol;(Z)-3-nonenol	AFC001022	AFC001022	5364631	F	0.368	0.596	NR	ug/kg	several mini-melons sampled	148
cis-3-nonen-1-ol	(Z)-3-nonen-1-ol;non-cis-3-en-1-ol;(Z)-3-nonenol	AFC001022	AFC001022	5364631	F	NR	NR	NR	NR		152
cis-3-nonen-1-ol	(Z)-3-nonen-1-ol;non-cis-3-en-1-ol;(Z)-3-nonenol	AFC001022	AFC001022	5364631	F,J	NR	NR	NR	NR		35
cis-3-nonen-1-ol	(Z)-3-nonen-1-ol;non-cis-3-en-1-ol;(Z)-3-nonenol	AFC001022	AFC001022	5364631	H	NR	NR	NR	NR		190
cis-3-nonen-1-ol	(Z)-3-nonen-1-ol;non-cis-3-en-1-ol;(Z)-3-nonenol	AFC001022	AFC001022	5364631	J	99.23	99.23	NR	ug/L		146
cis-3-nonen-1-ol	(Z)-3-nonen-1-ol;non-cis-3-en-1-ol;(Z)-3-nonenol	AFC001022	AFC001022	5364631	F	1251.9	1251.9	NR	mg/100 g	cv F1 Oneida; grafts onto citron rootstocks were performed, see ref for details	187
cis-3-nonen-1-ol	(Z)-3-nonen-1-ol;non-cis-3-en-1-ol;(Z)-3-nonenol	AFC001022	AFC001022	5364631	J	161.11	161.11	10.36	ug/L	cv Lizhiguan; data for 11 other cultivars are presented, see ref for details	126
cis-3-nonen-1-ol	(Z)-3-nonen-1-ol;non-cis-3-en-1-ol;(Z)-3-nonenol	AFC001022	AFC001022	5364631	F	3700	3700	NR	ng/g	cv Royal Armada fresh fruit; other samples include stored fruit, see ref for details	117
cis-9-heptadecenoic acid	margaroleic acid	AFC001939	AFC001939	5282748	S	0.02	0.02	0.01	percent	values for C. lanatus var. lanatus, see reference for values for var. citroides, detected with alternate methods	132
cis-9-lycopene		AFC001948	AFC001948	6440364	F	2.78	2.78	0.46	ug/g dw	cv Lizhiguan; data for 11 other cultivars are presented, see ref for details	126
cis-aconitic acid	cis-aconitate	AFC000819	AFC000819	643757	U						33
cis-caffeate	(2Z)-3-(3,4-dihydroxyphenyl)prop-2-enoate;cis-caffeate anion;cis-3,4-dihydroxy-cinnamate	AFC001448	AFC001448	54681167	U						33
cis-di-lycopene		AFC001949	AFC001949	no entry found	F	4.05	4.05	1.57	ug/g dw	cv Lizhiguan; data for 11 other cultivars are presented, see ref for details	126
cis-eicosadienoic acid		AFC001538	AFC001538	no entry found	S	NR	NR	NR	NR		108
cis-lycopene		AFC001950	AFC001950	101467043	F	0.13	0.13	0.03	ug/g	data for three other stages of ripening are presented, see ref for details	182
cis-zeatin		AFC000835	AFC000795	688597	U						33
cis-zeatin riboside		AFC001214	AFC001099	13935024	U						33
cis-zeatin riboside monophosphate		AFC001289	AFC001165	23724752	U						33
cis-zeatin-O-glucoside		AFC000898	AFC000898	5280589	U						33
citral	geranial;lemonal;(E)-citral;(E)-neral	AFC000810	AFC000810	638011	F	17	17	7	ug/kg	variety Rugby, see reference for values in unripe and overripe fruit	142
citral	geranial;lemonal;(E)-citral;(E)-neral	AFC000810	AFC000810	638011	F	1.3	1.3		percent VOC		171
citral	geranial;lemonal;(E)-citral;(E)-neral	AFC000810	AFC000810	638011	F	NR	NR	NR	NR		180
citral	geranial;lemonal;(E)-citral;(E)-neral	AFC000810	AFC000810	638011	F	0	39	2	ng/g		120
citral	geranial;lemonal;(E)-citral;(E)-neral	AFC000810	AFC000810	638011	F	NR	0.001	NR	ug/kg	several mini-melons sampled	148
citral	geranial;lemonal;(E)-citral;(E)-neral	AFC000810	AFC000810	638011	F	NR	NR	NR	NR		152
citral	geranial;lemonal;(E)-citral;(E)-neral	AFC000810	AFC000810	638011	F,J	NR	NR	NR	NR		35
citral	geranial;lemonal;(E)-citral;(E)-neral	AFC000810	AFC000810	638011	J	NR	NR	NR	NR		159
citral	geranial;lemonal;(E)-citral;(E)-neral	AFC000810	AFC000810	638011	U						33
citral	geranial;lemonal;(E)-citral;(E)-neral	AFC000810	AFC000810	638011	U						3
citramalate		AFC000172	AFC000172	1081	H	NR	NR	NR	NR		178
citrate	citric acid	AFC000056	AFC000056	311	F	0.8	0.8	0.5	mg/g	cv 203Z	193
citrate	citric acid	AFC000056	AFC000056	311	H	NR	NR	NR	NR		178
citrate	citric acid	AFC000056	AFC000056	311	J	NR	NR	NR	NR		158
citrate	citric acid	AFC000056	AFC000056	311	J	NR	NR	NR	NR		145
citrate	citric acid	AFC000056	AFC000056	311	J	NR	NR	NR	NR	several cultivars sampled	164
citrate	citric acid	AFC000056	AFC000056	311	U						33
citrate	citric acid	AFC000056	AFC000056	311	F	41.9	41.9	NR	mg/100 g	cv F1 Oneida; grafts onto citron rootstocks were performed, see ref for details	187
citrate	citric acid	AFC000056	AFC000056	311	F	0.76	0.76	0.2	mg/g	data are for SW frown in summer; data for 203Z and Sugar Baby were collected, see ref for details	156
citrate	citric acid	AFC000056	AFC000056	311	F	1.74	1.74	0.23	mg/g	cv SW at 34 days after pollination	138
citrate	citric acid	AFC000056	AFC000056	311	F	0.91	0.91	0.22	mg/g	cv 203Z at 34 days after pollination	138
citrate	citric acid	AFC000056	AFC000056	311	F	51.19	51.19	10.88	mg/g dw	cv Lizhiguan; data for 11 other cultivars are presented, see ref for details	126
citrullic acid		AFC001647	AFC001647	no entry found	V	NR	NR	NR	NR		35
citrulline	L-citrulline	AFC000322	AFC000322	9750	F	NR	NR	NR	NR		119
citrulline	L-citrulline	AFC000322	AFC000322	9750	F	1627	3705	NR	ppm		35
citrulline	L-citrulline	AFC000322	AFC000322	9750	F,R	24.7	24.7	NR	mg/g dwt	values are for rind; yellow and orange flesh melons had higher values	27
citrulline	L-citrulline	AFC000322	AFC000322	9750	F,R	1.1	4.7	NR	g/kg	several cultivars sampled with 2.0 to 7.2 g/kg in rind	177
citrulline	L-citrulline	AFC000322	AFC000322	9750	G	NR	NR	NR	NR	see reference for details on strains Calhoun Grey, Charleston Gray, PI-296341 and Sugar Baby	125
citrulline	L-citrulline	AFC000322	AFC000322	9750	G	NR	NR	NR	NR		167
citrulline	L-citrulline	AFC000322	AFC000322	9750	H	NR	NR	NR	NR		178
citrulline	L-citrulline	AFC000322	AFC000322	9750	J	24.22	24.22	1.07	mg/g	other samples had values 14.39±1.89, 16.98±0.21, 22.37±1.94, 24.37±1.09 mg/g, and 22.59±71.65 mg/mL in another variety	158
citrulline	L-citrulline	AFC000322	AFC000322	9750	J	NR	NR	NR	NR		145
citrulline	L-citrulline	AFC000322	AFC000322	9750	J	NR	NR	NR	NR	several cultivars sampled	164
citrulline	L-citrulline	AFC000322	AFC000322	9750	L,V	NR	NR	NR	NR	assayed under various conditions	154
citrulline	L-citrulline	AFC000322	AFC000322	9750	R	19.3	19.3	1.1	mg/100 kcal	In flesh, 10.0 ± 1.0 and in seed 1.4 ± 0.2	144
citrulline	L-citrulline	AFC000322	AFC000322	9750	U						33
citrulline	L-citrulline	AFC000322	AFC000322	9750	U						36
citrulline	L-citrulline	AFC000322	AFC000322	9750	U						122
citrulline	L-citrulline	AFC000322	AFC000322	9750	W	3175	3175	NR	mg/kg	variety 7197, see ref for details on spray dried powder formulation and values for powder derived from pomace	191
citrulline	L-citrulline	AFC000322	AFC000322	9750	F	1.46	2.95	NR	ug/g	cv Charleston Gray; data for 7 other cultivars are presented, see ref for details	121
citrulline	L-citrulline	AFC000322	AFC000322	9750	F	4.301	4.301	NR	mmol/L	cv Zaojia 8424 at a normal potassium level; grafts on other rootstocks and at low potassium are presented, see ref for details	116
citrulline	L-citrulline	AFC000322	AFC000322	9750	F	3.29	3.29	1.13	ug/g	data are for Sugar Baby, data for several other varieties are presented, see ref for details	176
citrulline	L-citrulline	AFC000322	AFC000322	9750	F	4.52	4.52	0.72	ug/g	data are for Tom Watson, data for several other varieties are presented, see ref for details	176
citrulline	L-citrulline	AFC000322	AFC000322	9750	F	1.09	1.09	0.52	ug/g	data are for LSW-177, data for several other varieties are presented, see ref for details	176
citrullol		AFC001648	AFC001648	no entry found	F	NR	NR	NR	NR		35
clerosterol	poriferasta-5,25-dien-3beta-ol;5,25-stigmastadienol	AFC000981	AFC000981	5283638	S	NR	NR	NR	NR		35
clerosterol	poriferasta-5,25-dien-3beta-ol;5,25-stigmastadienol	AFC000981	AFC000981	5283638	U						3
clesterol		AFC001649	AFC001649	no entry found	S	5	5	NR	mg/100g		130
CMP		AFC000241	AFC000241	6131	U						33
CMP-3-deoxy-D-manno-octulosonate		AFC000777	AFC000777	445888	U						33
CMP-N-acetylneuraminate		AFC000791	AFC000791	448209	U						33
codisterol	ergosta-5,25-dien-3beta-ol	AFC001209	AFC001209	13833114	S	NR	NR	NR	NR		35
codisterol	ergosta-5,25-dien-3beta-ol	AFC001209	AFC001209	13833114	U						3
coenzyme A		AFC000468	AFC000468	87642	U						33
coenzyme F420	factor gamma-F420-2	AFC000543	AFC000543	123996	U						33
coenzyme Q8	ubiquinone-8	AFC000979	AFC000979	5283546	U						33
coniferaldehyde	4-hydroxy-3-methoxycinnamaldehyde	AFC000891	AFC000891	5280536	U						33
coniferin		AFC000873	AFC000873	5280372	U						33
coniferyl alcohol	coniferol	AFC000840	AFC000840	1549095	U						33
copper		AFC000387	AFC000387	23978	F	0.042	0.042	NR	mg/100g		34
copper		AFC000387	AFC000387	23978	F	4	4	NR	ppm		35
copper		AFC000387	AFC000387	23978	P	0.59	0.59	0.008	mg/100g		137
copper		AFC000387	AFC000387	23978	S	0.4	0.4	0.1	g/100g protein		98
copper		AFC000387	AFC000387	23978	L	0.003	0.003	NR	mg/g dw	data are for Zaojia 8424 at fruit maturation; grafts onto rootstocks Jingxinzhen 1 and Qingyanzhen 1 were performed, see ref for details	151
copper		AFC000387	AFC000387	23978	R	0.011	0.011	NR	mg/g dw	data are for Zaojia 8424 at fruit maturation; grafts onto rootstocks Jingxinzhen 1 and Qingyanzhen 1 were performed, see ref for details	151
copper		AFC000387	AFC000387	23978	V	0.02	0.02	NR	mg/g dw	data are for Zaojia 8424 at fruit maturation; grafts onto rootstocks Jingxinzhen 1 and Qingyanzhen 1 were performed, see ref for details	151
copper		AFC000387	AFC000387	23978	S	0.38	0.38	0.06	mg/100 g	cv Charleston Gray	109
copper		AFC000387	AFC000387	23978	S	0.45	0.45	0.24	mg/100 g	cv Crimson Sweet	109
copper		AFC000387	AFC000387	23978	S	0.58	0.58	0.03	mg/100 g	cv Black Diamond	109
coproporphyrinogen III		AFC000058	AFC000058	321	U						33
cotinine		AFC000837	AFC000837	854019	U						33
coumaraldehyde		AFC000816	AFC000816	641301	U						33
coumarin	2H-chromen-2-one;2H-1-benzopyran-2-one;1,2-benzopyrone	AFC000059	AFC000059	323	F	NR	NR	NR	NR		166
coumarin	2H-chromen-2-one;2H-1-benzopyran-2-one;1,2-benzopyrone	AFC000059	AFC000059	323	F	NR	NR	NR	NR		144
crepenynate		AFC001063	AFC001063	5461139	U						33
crinosterol		AFC000984	AFC000940	5283660	U						33
crotonoyl-CoA	crotonyl-CoA	AFC001077	AFC001077	5497143	U						33
cucurbitacin A		AFC000936	AFC000936	5281315	F	2.75	2.75	NR	ug/ml		143
cucurbitacin B		AFC000937	AFC000937	5281316	F	NR	NR	NR	NR		24
cucurbitacin B		AFC000937	AFC000937	5281316	F	6.75	6.75	NR	ug/ml		143
cucurbitacin B		AFC000937	AFC000937	5281316	F	NR	NR	NR	NR		35
cucurbitacin B		AFC000937	AFC000937	5281316	G	0	7.1	NR	ug/g		112
cucurbitacin B-Glu		AFC001650	AFC001650	no entry found	F	NR	NR	NR	NR		24
cucurbitacin D-Glu	cucurbitacin D	AFC001651	AFC001651	no entry found	F	NR	NR	NR	NR		24
cucurbitacin E	alpha-elaterin	AFC000938	AFC000938	5281319	F	NR	NR	NR	NR		24
cucurbitacin E	alpha-elaterin	AFC000938	AFC000938	5281319	F	NR	NR	NR	NR		194
cucurbitacin E	alpha-elaterin	AFC000938	AFC000938	5281319	F,L	NR	NR	NR	NR		35
cucurbitacin E	alpha-elaterin	AFC000938	AFC000938	5281319	G	6	160	NR	ug/g		112
cucurbitacin E	alpha-elaterin	AFC000938	AFC000938	5281319	J	NR	NR	NR	NR		145
cucurbitacin E	alpha-elaterin	AFC000938	AFC000938	5281319	U						3
cucurbitacin E glycoside		AFC001652	AFC001652	no entry found	F	NR	NR	NR	NR	cv Bitter Hawkesbury	23
cucurbitacin E glycoside		AFC001652	AFC001652	no entry found	F	NR	NR	NR	NR		35
cucurbitacin E glycoside		AFC001652	AFC001652	no entry found	G	9	71	NR	ug/g		112
cucurbitacin E-Glu		AFC001653	AFC001653	no entry found	F	NR	NR	NR	NR		24
cucurbitacin I	elatericin B	AFC001776	AFC001776	5281321	F	NR	NR	NR	NR		194
cucurbitacin I 2-O-beta-D-glucopyranoside	cucurbitacin I-Glu	AFC001654	AFC001654	6441519	F	NR	NR	NR	NR		24
cucurbitacin I 2-O-beta-D-glucopyranoside	cucurbitacin I-Glu	AFC001654	AFC001654	6441519	F	NR	NR	NR	NR		194
cucurbitacin II		AFC001655	AFC001655	no entry found	F	NR	NR	NR	NR		35
cucurbitacin J	FBGLZDYMEULGSX-UHFFFAOYSA-N	AFC001790	AFC001790	441819	U						3
cucurbitocitrin		AFC001656	AFC001656	no entry found	S	NR	NR	NR	NR		35
curcumin		AFC000838	AFC000838	969516	F	NR	NR	NR	NR		143
cyanate		AFC000508	AFC000508	105034	U						33
cyanidin		AFC000548	AFC000548	128861	F	NR	NR	NR	NR		180
cyanidin 3-O-glucoside		AFC001914	AFC001914	441667	F	NR	NR	NR	NR	see reference for details	26
cyanidin O-rutinoside	keracyanin;sambucine;cyanidin 3-(2-rhamnosylglucoside)	AFC001931	AFC001931	441674	F	NR	NR	NR	NR	see reference for details	26
cyclic AMP		AFC000237	AFC000237	6076	F	NR	NR	NR	NR	see reference for details	26
cyclic AMP		AFC000237	AFC000237	6076	U						33
cyclic GMP		AFC001552	AFC001552	135398570	U						33
cyclic pyranopterin monophosphate		AFC001589	AFC001589	135463437	U						33
cyclic-2,3-O-oxalyl-L-threonate		AFC001501	AFC001501	90659383	U						33
cyclic-3,4-O-oxalyl-L-threonate		AFC001489	AFC001489	90658084	U						33
cycloartenol		AFC000476	AFC000476	92110	U						33
cycloeucalenol	4,14-dimethyl-9,19-cycloergost-24(28)-en-3-ol	AFC000503	AFC000503	101690	S	NR	NR	NR	NR		35
cycloeucalenol	4,14-dimethyl-9,19-cycloergost-24(28)-en-3-ol	AFC000503	AFC000503	101690	U						33
cycloeucalenone		AFC001260	AFC001260	21594790	U						33
cysteine		AFC000079	AFC000079	594	F	NR	NR	NR	NR	see reference for details	26
cysteine		AFC000079	AFC000079	594	F,S	236	236	NR	ppm	5742 ppm in seed	35
cysteine		AFC000079	AFC000079	594	G	NR	NR	NR	NR		139
cysteine		AFC000079	AFC000079	594	H	NR	NR	NR	NR		178
cysteinylglycine		AFC000685	AFC000685	439498	U						33
cytidine		AFC000247	AFC000247	6175	F	NR	NR	NR	NR	see reference for details	26
cytidine		AFC000247	AFC000247	6175	U						33
cytidine-5'-triphosphate	CTP	AFC000248	AFC000248	6176	U						33
cytosine		AFC000080	AFC000080	597	U						33
D-(-)-threose		AFC000694	AFC000494	439665	H	NR	NR	NR	NR		178
D-(+)-cellotriose		AFC000988	AFC000690	5287993	H	NR	NR	NR	NR		178
D-4'-phosphopantothenate		AFC000416	AFC000416	41635	U						33
D-alanine		AFC000450	AFC000081	71080	U						33
D-alanyl-D-alanine		AFC001055	AFC001055	5460362	U						33
D-arabinose 5-phosphate		AFC000608	AFC000608	188324	U						33
D-carnitinyl-CoA		AFC001432	AFC001432	52921607	U						33
D-cysteine		AFC000490	AFC000079	92851	U						33
D-erythro-imidazole-glycerol-phosphate	D-erythro-1-(Imidazol-4-yl)glycerol 3-phosphate	AFC000713	AFC000713	440431	U						33
D-erythrose-4-phosphate		AFC000534	AFC000534	122357	U						33
D-galactose		AFC000233	AFC000214	6036	F	14.7	14.7	2	mg/100g		118
D-galactose		AFC000233	AFC000214	6036	F	0.486	0.486	NR	mmol/L	cv Zaojia 8424 at a normal potassium level; grafts on other rootstocks and at low potassium are presented, see ref for details	116
D-galactosylononitol	4-O-methylgalactinol	AFC001153	AFC001153	10713243	U						33
D-galacturonic acid	D-galacturonate	AFC000647	AFC000497	439215	F	NR	NR	NR	NR		180
D-galacturonic acid	D-galacturonate	AFC000647	AFC000497	439215	H	NR	NR	NR	NR		178
D-glucosamine 1-phosphate		AFC000609	AFC000609	188960	U						33
D-glucose 6-phosphate	D-glucose-6-P	AFC001262	AFC001262	21604865	F	NR	NR	NR	NR		180
D-glucose 6-phosphate	D-glucose-6-P	AFC001262	AFC001262	21604865	H	NR	NR	NR	NR		178
D-glucuronic acid	glucuronate;D-glucopyranuronate	AFC000497	AFC000497	94715	H	NR	NR	NR	NR		178
D-glyceraldehyde		AFC000463	AFC000463	79014	U						33
D-glyceraldehyde 3-phosphate		AFC000638	AFC000638	439168	F	NR	NR	NR	NR		180
D-glyceraldehyde 3-phosphate		AFC000638	AFC000638	439168	U						33
D-glycerate		AFC001054	AFC001054	5460358	U						33
D-mannitol		AFC000250	AFC000212	6251	U						33
D-mannitol 1-phosphate		AFC000550	AFC000550	130418	F	NR	NR	NR	NR	see reference for details	26
D-mannitol 1-phosphate		AFC000550	AFC000550	130418	U						33
D-melibiose	melibiose	AFC000719	AFC000719	440658	U						33
D-myo-inositol (1,2,3,4,5)-pentakisphosphate		AFC001358	AFC001358	25246002	U						33
D-myo-inositol (1,2,3,4) tetrakisphosphate		AFC001330	AFC001310	25244337	U						33
D-myo-inositol (1,2,3,5,6) pentakisphosphate		AFC001364	AFC001358	25246187	U						33
D-myo-inositol (1,2,3,6) tetrakisphosphate		AFC001312	AFC001312	25201651	U						33
D-myo-inositol (1,2,3) trisphosphate		AFC001341	AFC001342	25244812	U						33
D-myo-inositol (1,2,4,5,6)-pentakisphosphate		AFC000712	AFC000684	440388	U						33
D-myo-inositol (1,2,5,6) tetrakisphosphate		AFC001215	AFC000750	14033625	U						33
D-myo-inositol (1,2,6) trisphosphate		AFC001332	AFC001332	25244400	U						33
D-myo-inositol (1,2) bisphosphate		AFC001353	AFC001254	25245835	U						33
D-myo-inositol (1,3,4,5,6)-pentakisphosphate		AFC000684	AFC000684	439468	U						33
D-myo-inositol (1,3,4,5)-tetrakisphosphate		AFC001292	AFC001292	24742076	U						33
D-myo-inositol (1,3,4,6)-tetrakisphosphate		AFC000527	AFC000527	121969	U						33
D-myo-inositol (1,3,4)-trisphosphate		AFC000682	AFC000682	439455	U						33
D-myo-inositol (1,4,5,6)-tetrakisphosphate		AFC000750	AFC000750	443266	U						33
D-myo-inositol (1,4,5)-trisphosphate		AFC000683	AFC000682	439456	U						33
D-myo-inositol (1,4)-bisphosphate		AFC000679	AFC000679	439444	U						33
D-myo-inositol (2,3,4) trisphosphate		AFC001328	AFC001332	25244128	U						33
D-myo-inositol (2,4) bisphosphate		AFC001352	AFC001352	25245743	U						33
D-myo-inositol (3,4,5,6)-tetrakisphosphate		AFC001310	AFC001310	25201333	U						33
D-myo-inositol (3,4,6)-trisphosphate		AFC001306	AFC001306	25200986	U						33
D-myo-inositol (3,4)-bisphosphate		AFC001254	AFC001254	21120281	U						33
D-myo-inositol 1,2-cyclic phosphate		AFC000532	AFC000532	122331	U						33
D-pinitol	D-ononitol;3-O-methyl-D-chiro-inositol;methylinositol	AFC000587	AFC000587	164619	U						33
D-ribosylnicotinate		AFC000578	AFC000578	161233	F	NR	NR	NR	NR	see reference for details	26
D-ribosylnicotinate		AFC000578	AFC000578	161233	U						33
D-ribulose-1-phosphate		AFC001230	AFC001230	14844436	U						33
D-ribulose-1,5-bisphosphate		AFC001279	AFC001279	23615473	U						33
D-ribulose-5-phosphate		AFC000642	AFC000642	439184	U						33
D-sedoheptulose-1,7-bisphosphate		AFC000589	AFC000589	164735	U						33
D-sedoheptulose-7-phosphate		AFC001408	AFC001408	46878379	U						33
D-serine		AFC000449	AFC000083	71077	U						33
D-threo-isocitrate		AFC001039	AFC001039	5459771	U						33
D-threose	D-erythrose	AFC000494	AFC000494	94176	F	NR	NR	NR	NR	see reference for details	26
D-threose	D-erythrose	AFC000494	AFC000494	94176	H	NR	NR	NR	NR		178
D-xylulose		AFC000993	AFC000993	5289590	U						33
D-xylulose-5-phosphate		AFC000643	AFC000642	439190	U						33
D:C-friedoolean-7,9(11)-dien-3beta-ol-29-oic acid		AFC001465	AFC001465	70680340	L	0.5	0.5	NR	mg/g dwt		136
D:C-friedoolean-7,9(11)-dien-3beta-ol-29-oic acid		AFC001465	AFC001465	70680340	U					cell culture	123
D(+)-glucose	aldehydo-D-glucose	AFC000509	AFC000509	107526	H	NR	NR	NR	NR		178
D(+)-glucose	aldehydo-D-glucose	AFC000509	AFC000509	107526	U						33
D(+)-melezitose O-rhamnoside		AFC001657	AFC001657	no entry found	H	NR	NR	NR	NR		178
daphnetin	7,8-dihydroxycoumarin;daphnetol;7,8-dihydroxy-2H-chromen-2-one	AFC000897	AFC000897	5280569	S	NR	NR	NR	NR		35
decaffeoylacetoside or descaffeoylverbascoside		AFC001658	AFC001658	no entry found	F	NR	NR	NR	NR		166
decaffeoylacetoside or descaffeoylverbascoside 2		AFC001659	AFC001659	no entry found	F,R,S	NR	NR	NR	NR		144
decaffeoylacetoside or descaffeoylverbascoside 3		AFC001660	AFC001660	no entry found	F,R,S	NR	NR	NR	NR		144
decaffeoylacetoside or descaffeoylverbascoside 4		AFC001661	AFC001661	no entry found	F	NR	NR	NR	NR		144
decanal		AFC000303	AFC000303	8175	F	100	100	34	ug/kg	variety Rugby, see reference for values in unripe and overripe fruit	142
decanal		AFC000303	AFC000303	8175	F	1.7	1.7	NR	ng/g	C. vulgaris Schrad	163
decanal		AFC000303	AFC000303	8175	F	0.019	0.024	NR	ug/kg	several mini-melons sampled	148
decanal		AFC000303	AFC000303	8175	J	NR	NR	NR	NR		146
decanal		AFC000303	AFC000303	8175	F	5.2	5.2	NR	mg/100 g	cv F1 Oneida; grafts onto citron rootstocks were performed, see ref for details	187
decanal		AFC000303	AFC000303	8175	F	10	10	NR	ng/g	cv Royal Armada fresh fruit; other samples include stored fruit, see ref for details	117
decanoic acid	capric acid;fatty acid 10:0	AFC000200	AFC000200	2969	F	0.001	0.001	NR	g/100g		34
decanoic acid	capric acid;fatty acid 10:0	AFC000200	AFC000200	2969	F	0.001	0.001	NR	mg		124
decanoic acid	capric acid;fatty acid 10:0	AFC000200	AFC000200	2969	S	0.5	0.5	NR	percent		114
decanoic acid	capric acid;fatty acid 10:0	AFC000200	AFC000200	2969	S	2200	4840	NR	ppm		35
dehydroabietylamine		AFC001899	AFC001899	62034	F	NR	NR	NR	NR	see reference for details	26
dehydroascorbate (bicyclic form)		AFC001500	AFC001500	90659000	U						33
dehydroascorbic acid	L-dehydro-ascorbate	AFC000720	AFC000720	440667	F	NR	NR	NR	NR		180
dehydroascorbic acid	L-dehydro-ascorbate	AFC000720	AFC000720	440667	F	89.7	105	NR	mg/kg	several cultivars sampled	110
dehydroascorbic acid	L-dehydro-ascorbate	AFC000720	AFC000720	440667	U						33
dehydrocarvone		AFC001662	AFC001662	no entry found	F	NR	0.001	NR	ug/kg	several mini-melons sampled	148
dehydrocrepenynic acid	14,15-dehydrocrepenynic acid	AFC001891	AFC001891	14427323	F	NR	NR	NR	NR	see reference for details	26
delphinidin	3,3',4',5,5',7-hexahydroxyflavylium	AFC000547	AFC000547	128853	F	NR	NR	NR	NR		180
delphinidin	3,3',4',5,5',7-hexahydroxyflavylium	AFC000547	AFC000547	128853	U						33
delphinidin-3-O-beta-D-glucoside	myrtillin	AFC001521	AFC001521	165558	U						33
delta-7-avenasterol	avenasterol;7-dehydroavenasterol	AFC001202	AFC001202	12795736	S	NR	NR	NR	NR	detected in seed oil	35
delta-7-avenasterol	avenasterol;7-dehydroavenasterol	AFC001202	AFC001202	12795736	U						33
delta-7-avenasterol	avenasterol;7-dehydroavenasterol	AFC001202	AFC001202	12795736	U						3
delta-7-stigmasterol	corbisterol	AFC001938	AFC001938	131751494	S	5.32	5.32	0.06	mg/100g	values for C. lanatus var. lanatus, see reference for values for var. citroides, detected with alternate methods	132
delta-aminolevulinic acid hydrochloride	5-aminolevulinic acid hydrochloride	AFC000538	AFC000020	123608	H	NR	NR	NR	NR		178
delta-carotene		AFC000930	AFC000930	5281230	F	NR	NR	NR	NR		180
delta-carotene		AFC000930	AFC000930	5281230	U						33
delta-tocopherol		AFC000474	AFC000474	92094	S	NR	NR	NR	NR	values for C. lanatus var. lanatus, see reference for values for var. citroides, detected with alternate methods	132
delta-tocopherol		AFC000474	AFC000474	92094	S	9.1	58.3	NR	mg/kg		175
delta-tocopherol		AFC000474	AFC000474	92094	S	NR	NR	NR	NR		108
delta-tocopherol		AFC000474	AFC000474	92094	U						33
delta-tridecalactone	6-octyloxan-2-one	AFC001880	AFC001880	110977	F	NR	NR	NR	NR	see reference for details	26
demethylmenaquinol-8		AFC001397	AFC001397	45479277	U						33
denin		AFC001935	AFC001935	101268475	F	NR	NR	NR	NR	see reference for details	26
deoxyadenosine		AFC000364	AFC000364	13730	F	NR	NR	NR	NR	see reference for details	26
deoxyadenosine		AFC000364	AFC000364	13730	U						33
deoxycohumulone	diprenylphlorisobutyrophenone	AFC001323	AFC001323	25203729	U						33
deoxycytidine diphosphate	dCDP	AFC000558	AFC000558	150855	F	NR	NR	NR	NR	see reference for details	26
deoxycytidine diphosphate	dCDP	AFC000558	AFC000558	150855	U						33
deoxyhumulone	diprenylphlorisovalerophenone	AFC001104	AFC001104	6450808	U						33
deoxyuridine triphosphate	dUTP	AFC000428	AFC000428	65070	U						33
deoxyuridine-5'-diphosphate	dUDP	AFC000555	AFC000555	145729	U						33
dephospho-CoA		AFC000763	AFC000763	444485	U						33
desmosterol		AFC000689	AFC000689	439577	U						33
desthiobiotin	dethiobiotin	AFC000084	AFC000084	643	U						33
di-trans, poly-cis-polyprenyl diphosphate (C80)		AFC001414	AFC001414	46926091	U						33
di-trans,octa-cis-undecaprenyl diphosphate		AFC001351	AFC001351	25245563	U						33
diadenosine tetraphosphate	5',5'''-diadenosine tetraphosphate;Ap4A;P(1),P(4)-bis(5'-adenosyl) tetraphosphate	AFC001324	AFC001324	21706	U						33
DIBOA-beta-D-glucoside		AFC000999	AFC000999	5316752	U						33
dicaffeoylshikimic acid I		AFC001666	AFC001666	no entry found	F	NR	NR	NR	NR		166
dicaffeoylshikimic acid II		AFC001667	AFC001667	no entry found	F	NR	NR	NR	NR		166
dicaffeoylshikimic acid III		AFC001663	AFC001663	no entry found	F	NR	NR	NR	NR		166
dicaffeoylshikimic acid IV		AFC001668	AFC001668	no entry found	F	NR	NR	NR	NR		166
diethyl disulfide		AFC000298	AFC000298	8077	J	NR	NR	NR	NR		146
diethyl hydrogen phosphate	diethylphosphate	AFC000088	AFC000088	654	H	NR	NR	NR	NR		178
digalacturonate		AFC000696	AFC000696	439694	U						33
dihydroactinidolide		AFC000401	AFC000401	27209	F	NR	NR	NR	NR		180
dihydroactinidolide		AFC000401	AFC000401	27209	F	0	15	2	ng/g		120
dihydrokaempferol	aromadendrin	AFC000535	AFC000535	122850	U						33
dihydrokaempferol 7-glucoside	eriodictyol 7-glucoside or dihydrokaempferol 7-glucoside I	AFC001512	AFC001512	101683279	F	NR	NR	NR	NR		166
dihydrolipoamide		AFC000089	AFC000089	663	U						33
dihydrolipoate		AFC000065	AFC000065	421	U						33
dihydromyricetin	ampelopsin	AFC000583	AFC000583	161557	U						33
dihydrophilonotisﬂavone	2,3-dihydrophilonotisflavone	AFC001669	AFC001669	no entry found	F	NR	NR	NR	NR		166
dihydropyrimidine	pyrimidine-ring	AFC000168	AFC000168	1056	U						33
dihydroxyacetone phosphate		AFC000090	AFC000090	668	U						33
dihydroxyphaseic acid		AFC001602	AFC001602	138319162	U						33
dihydrozeatin		AFC000412	AFC000412	32021	U						33
dihydrozeatin-9-N-glucoside		AFC001315	AFC001315	25201996	U						33
dihydrozeatin-9-N-glucoside-O-glucoside		AFC001313	AFC001313	25201670	U						33
dihydrozeatin-O-glucoside		AFC001290	AFC001290	23724755	U						33
DIMBOA	2,4-dihydroxy-7-methoxy-1,4-benzoxazin-3-one	AFC001303	AFC001303	2358	U						33
DIMBOA-glc	DIMBOA glucoside;DIMBOA-beta-D-glucoside	AFC001355	AFC001355	4480305	U						33
dimeric urushiol	14'-(3,4-dihydroxy-5'-alkenyl) phenyl-3-[9'E,11' E,13' Z-pentacatrienl]catechol	AFC001427	AFC001427	50986152	U						33
dimeric urushiol peroxide	bis[1-[(1E,3E,5Z)-1,3,5-heptatrienyl]-8-(2,3-dihydroxyphenyl)octyl] ether	AFC001504	AFC001504	91819806	U						33
dimethyl disulfide		AFC000350	AFC000350	12232	J	NR	NR	NR	NR		146
dimethyl sulfide		AFC000171	AFC000171	1068	U						33
dimethyl trisulfide		AFC000380	AFC000380	19310	J	NR	NR	NR	NR		146
dimethylallyl diphosphate		AFC000085	AFC000085	647	F	NR	NR	NR	NR		180
dimethylallyl diphosphate		AFC000085	AFC000085	647	U						33
dimethylallyl-phlorisobutyrophenone	4-prenylphlorisobutyrophenone	AFC001320	AFC001320	25203134	U						33
dipropyl disulfide		AFC000352	AFC000352	12377	J	NR	NR	NR	NR		146
divinyl protochlorophyllide a	2,4-divinylprotochlorophyllide	AFC000751	AFC000751	443429	U						33
docosanedioate	docosanedioic acid;phellogesnic acid	AFC001266	AFC001266	244872;22173968	U						33
docosanoic acid	behenic acid	AFC000308	AFC000308	8215	S	0.06	0.06	0.02	percent wwt		130
docosanoic acid	behenic acid	AFC000308	AFC000308	8215	S	NR	NR	NR	NR		131
dodecanal		AFC000306	AFC000306	8194	F	0.006	0.013	NR	ug/kg	several mini-melons sampled	148
dodecanal		AFC000306	AFC000306	8194	F	NR	NR	NR	NR		152
dodecanoate	laurate	AFC000863	AFC000863	4149208	U						33
dopamine		AFC000092	AFC000092	681	F	NR	NR	NR	NR	see reference for details	26
dopamine		AFC000092	AFC000092	681	U						33
dopaquinone		AFC000663	AFC000663	439316	U						33
dTDP-4-dehydro-6-deoxy-alpha-D-glucose		AFC000662	AFC000662	439292	U						33
dTDP-4-dehydro-beta-L-rhamnose	dTDP-4-dehydro-6-deoxy-beta-L-mannose	AFC000747	AFC000662	443211	U						33
dTDP-alpha-L-rhamnose	TDP-rhamnose;thymidine 5'-[3-(6-deoxy-alpha-L-mannopyranosyl) dihydrogen diphosphate]	AFC001514	AFC001514	101989498	U						33
eicosanoyl-CoA	arachidoyl-CoA	AFC000854	AFC000854	3081439	U						33
eicosapentaenoic acid		AFC000781	AFC000781	446284	S	NR	NR	NR	NR		108
elaterinide	cucurbitacin E 2-O-beta-D-glucopyranoside;cucurbitacin E-2-O-glucoside;colocynthin;cueg;coloside A	AFC001080	AFC001080	5901827	F	NR	NR	NR	NR		194
elaterinide	cucurbitacin E 2-O-beta-D-glucopyranoside;cucurbitacin E-2-O-glucoside;colocynthin;cueg;coloside A	AFC001080	AFC001080	5901827	F	NR	NR	NR	NR		35
elaterinide	cucurbitacin E 2-O-beta-D-glucopyranoside;cucurbitacin E-2-O-glucoside;colocynthin;cueg;coloside A	AFC001080	AFC001080	5901827	J	NR	NR	NR	NR		23
ent-7alpha-hydroxykaur-16-en-19-oate	ent-7-alpha-hydroxykaurenoate	AFC001299	AFC001299	25200352	U						33
ent-copalyl diphosphate		AFC000920	AFC000920	5280897	U						33
ent-isokaurene	ent-kaur-15-ene;isokaurene;kryptomeren	AFC001198	AFC001198	12311059	U						33
ent-kaur-16-en-19-oate	ent-kaurenoate	AFC001302	AFC001302	25200785	U						33
ent-kaurenal	kaur-16-en-18-al;kaurenal;ent-kaur-16-en-19-al	AFC000758	AFC000758	443466	U						33
ent-kaurene		AFC001177	AFC001177	11966109	U						33
ent-kaurenol	kaur-16-en-18-ol;kaurenol;ent-kaurenol	AFC000757	AFC000757	443465	U						33
episterol		AFC000985	AFC000985	5283662	U						33
episterone		AFC001227	AFC001227	14826704	U						33
epsilon-carotene		AFC000782	AFC000782	446439	U						33
epsilon,epsilon-carotene-3-diol		AFC001670	AFC001670	5471691	U						33
eriodictyol	3',4',5,7-tetrahydroxyflavanone	AFC000721	AFC000721	440735	U						33
eriodictyol 7-glucoside	eriodictyol 7-glucoside or dihydrokaempferol 7-glucoside I;miscanthoside	AFC001542	AFC001542	134693055	F	NR	NR	NR	NR		166
erucic acid		AFC000924	AFC000924	5281116	S	0.07	0.07	0.04	percent wwt		130
erythrodiol		AFC001779	AFC001779	101761	U						3
ethanol	ethyl alcohol	AFC000094	AFC000094	702	F	172.44	172.44	NR	ug/kg	cv Proteo ungrafted watermelon	173
ethanol	ethyl alcohol	AFC000094	AFC000094	702	F	0	1.5	NR	percent VOC		171
ethanol	ethyl alcohol	AFC000094	AFC000094	702	F	NR	NR	NR	NR		180
ethanol	ethyl alcohol	AFC000094	AFC000094	702	F	NR	NR	NR	NR		111
ethanol	ethyl alcohol	AFC000094	AFC000094	702	F	NR	NR	NR	NR		152
ethanol	ethyl alcohol	AFC000094	AFC000094	702	H	NR	NR	NR	NR		190
ethanol	ethyl alcohol	AFC000094	AFC000094	702	J	NR	NR	NR	NR		35
ethanol	ethyl alcohol	AFC000094	AFC000094	702	U						33
ethanol	ethyl alcohol	AFC000094	AFC000094	702	U						3
ethanol	ethyl alcohol	AFC000094	AFC000094	702	F	34	34	NR	ng/g	cv Royal Armada fresh fruit; other samples include stored fruit, see ref for details	117
ethanolamine		AFC000093	AFC000093	700	T	NR	NR	NR	NR	several cultivars sampled	170
ethanolamine		AFC000093	AFC000093	700	U						33
ethenylbenzene	styrene	AFC000284	AFC000284	7501	J	NR	NR	NR	NR		146
ethyl 2-methylbutyrate	ethyl 2-methylbutanoate	AFC000389	AFC000389	24020	F	114.27	114.27	NR	ug/kg	cv Proteo ungrafted watermelon	173
ethyl 2-methylbutyrate	ethyl 2-methylbutanoate	AFC000389	AFC000389	24020	F	8.3	8.3	NR	ng/g	C. vulgaris Schrad	163
ethyl 2-methylbutyrate	ethyl 2-methylbutanoate	AFC000389	AFC000389	24020	F	7.1	7.1	NR	mg/100 g	cv F1 Oneida; grafts onto citron rootstocks were performed, see ref for details	187
ethyl 3,4-dihydroxybenzoate		AFC001866	AFC001866	77547	F	NR	NR	NR	NR	see reference for details	26
ethyl acetate		AFC000315	AFC000315	8857	F	3.91	3.91	NR	ug/kg	cv Proteo ungrafted watermelon	173
ethyl acetate		AFC000315	AFC000315	8857	J	NR	NR	NR	NR		146
ethyl butyrate	ethyl butanoate	AFC000288	AFC000288	7762	F	22.18	22.18	NR	ug/kg	cv Proteo ungrafted watermelon	173
ethyl butyrate	ethyl butanoate	AFC000288	AFC000288	7762	F	50.3	50.3	NR	mg/100 g	cv F1 Oneida; grafts onto citron rootstocks were performed, see ref for details	187
ethyl decanoate		AFC000295	AFC000295	8048	F	2.77	2.77	NR	ug/kg	cv Proteo ungrafted watermelon	173
ethyl hexanoate		AFC000410	AFC000410	31265	F	25.65	25.65	NR	ug/kg	cv Proteo ungrafted watermelon	173
ethyl isobutyrate	ethyl 2-methylpropanoate	AFC000275	AFC000275	7342	F	7.23	7.23	NR	ug/kg	cv Proteo ungrafted watermelon	173
ethyl laurate	ethyl dodecanoate	AFC000290	AFC000290	7800	F	0.41	0.41	NR	ug/kg	cv Proteo ungrafted watermelon	173
ethyl octanoate	ethyl caprylate	AFC000289	AFC000289	7799	F	4.85	4.85	NR	ug/kg	cv Proteo ungrafted watermelon	173
ethyl propionate	ethyl propanoate	AFC000287	AFC000287	7749	F	2.27	2.27	NR	ug/kg	cv Proteo ungrafted watermelon	173
ethyl propyl disulfide		AFC000415	AFC000415	35349	J	NR	NR	NR	NR		146
ethyl vinyl ketone	1-penten-3-one;1-pentene-3-one;methylbutenone;propionylethylene	AFC000369	AFC000369	15394	F	0	2.1		percent VOC		171
ethyl vinyl ketone	1-penten-3-one;1-pentene-3-one;methylbutenone;propionylethylene	AFC000369	AFC000369	15394	F	NR	NR	NR	NR		180
ethyl vinyl ketone	1-penten-3-one;1-pentene-3-one;methylbutenone;propionylethylene	AFC000369	AFC000369	15394	J	NR	NR	NR	NR		159
ethyl vinyl ketone	1-penten-3-one;1-pentene-3-one;methylbutenone;propionylethylene	AFC000369	AFC000369	15394	J	3.09	3.09	NR	ug/L		146
ethyl vinyl ketone	1-penten-3-one;1-pentene-3-one;methylbutenone;propionylethylene	AFC000369	AFC000369	15394	U						33
ethyl vinyl ketone	1-penten-3-one;1-pentene-3-one;methylbutenone;propionylethylene	AFC000369	AFC000369	15394	F	55	55	NR	ng/g	cv Royal Armada fresh fruit; other samples include stored fruit, see ref for details	117
ethylene		AFC000261	AFC000261	6325	U						33
ethylnitronate		AFC001078	AFC001078	5748355	U						33
eucalyptol	cineole;1,8-cineole	AFC000199	AFC000199	2758	F	38.53	38.53	NR	ug/kg	cv Proteo ungrafted watermelon	173
eucalyptol	cineole;1,8-cineole	AFC000199	AFC000199	2758	S	NR	NR	NR	NR		35
eucalyptol	cineole;1,8-cineole	AFC000199	AFC000199	2758	U						33
eugenol	4-allyl-2-methoxyphenol;4-allylguaiacol	AFC001858	AFC001858	3314	F	NR	NR	NR	NR	see reference for details	26
FAD		AFC000823	AFC000823	643975	U						33
FADH2		AFC000780	AFC000780	446013	U						33
farnesyl acetone	(5E,9E)-farnesyl acetone;(5E,9E)-6,10,14-trimethylpentadeca-5,9,13-trien-2-one	AFC000846	AFC000846	1711945	F	NR	NR	NR	NR		180
farnesyl acetone	(5E,9E)-farnesyl acetone;(5E,9E)-6,10,14-trimethylpentadeca-5,9,13-trien-2-one	AFC000846	AFC000846	1711945	F	0	64	3	ng/g		120
farnesyl acetone	(5E,9E)-farnesyl acetone;(5E,9E)-6,10,14-trimethylpentadeca-5,9,13-trien-2-one	AFC000846	AFC000846	1711945	J	NR	NR	NR	NR		35
farnesyl acetone	(5E,9E)-farnesyl acetone;(5E,9E)-6,10,14-trimethylpentadeca-5,9,13-trien-2-one	AFC000846	AFC000846	1711945	U						3
Fe(II)-nicotianamine		AFC001425	AFC001142	49859726	U						33
Fe(III)-[N-(2,3-dihydroxybenzoyl)-L-serine]3	ferric (2,3-dihydroxybenzoylserine)3	AFC001547	AFC001547	134820260	U						33
fecosterol		AFC000710	AFC000710	440371	U						33
ferric iron	Fe3+	AFC000406	AFC000406	29936	S	1.3	1.3	0.2	g/100g protein	ferric and ferrous ions not distinguished	98
ferric iron	Fe3+	AFC000406	AFC000406	29936	U						33
ferrous iron	Fe2+;iron;Fe	AFC000402	AFC000402	27284	F	0.24	0.24	NR	mg/100g		34
ferrous iron	Fe2+;iron;Fe	AFC000402	AFC000402	27284	F,S	2	143	NR	ppm	ferric and ferrous ions not distinguished;75 ppm in seed	35
ferrous iron	Fe2+;iron;Fe	AFC000402	AFC000402	27284	P	12.08	12.08	0.09	mg/100g	ferric and ferrous ions not distinguished	137
ferrous iron	Fe2+;iron;Fe	AFC000402	AFC000402	27284	S	1.3	1.3	0.2	g/100g protein	ferric and ferrous ions not distinguished	98
ferrous iron	Fe2+;iron;Fe	AFC000402	AFC000402	27284	U						33
ferrous iron	Fe2+;iron;Fe	AFC000402	AFC000402	27284	L	0.131	0.131	NR	mg/g dw	data are for Zaojia 8424 at fruit maturation; grafts onto rootstocks Jingxinzhen 1 and Qingyanzhen 1 were performed, see ref for details	151
ferrous iron	Fe2+;iron;Fe	AFC000402	AFC000402	27284	R	0.176	0.176	NR	mg/g dw	data are for Zaojia 8424 at fruit maturation; grafts onto rootstocks Jingxinzhen 1 and Qingyanzhen 1 were performed, see ref for details	151
ferrous iron	Fe2+;iron;Fe	AFC000402	AFC000402	27284	V	0.393	0.393	NR	mg/g dw	data are for Zaojia 8424 at fruit maturation; grafts onto rootstocks Jingxinzhen 1 and Qingyanzhen 1 were performed, see ref for details	151
ferrous iron	Fe2+;iron;Fe	AFC000402	AFC000402	27284	S	3.71	3.71	0.06	mg/100 g	cv Charleston Gray	109
ferrous iron	Fe2+;iron;Fe	AFC000402	AFC000402	27284	S	2.72	2.72	0.11	mg/100 g	cv Crimson Sweet	109
ferrous iron	Fe2+;iron;Fe	AFC000402	AFC000402	27284	S	4.6	4.6	0.07	mg/100 g	cv Black Diamond	109
ferulic acid	ferulate;4-hydroxy-3-methoxycinnamic acid;coniferic acid	AFC000776	AFC000776	445858	F	NR	NR	NR	NR		180
ferulic acid	ferulate;4-hydroxy-3-methoxycinnamic acid;coniferic acid	AFC000776	AFC000776	445858	G	NR	NR	NR	NR	see reference for details on strains Calhoun Grey, Charleston Gray, PI-296341 and Sugar Baby	125
ferulic acid	ferulate;4-hydroxy-3-methoxycinnamic acid;coniferic acid	AFC000776	AFC000776	445858	S	68.285	68.285	NR	ug/ml		147
ferulic acid	ferulate;4-hydroxy-3-methoxycinnamic acid;coniferic acid	AFC000776	AFC000776	445858	U						33
ferulic acid hexoside 1		AFC001671	AFC001671	no entry found	F,R,S	NR	NR	NR	NR		144
ferulic acid hexoside 2		AFC001672	AFC001672	no entry found	F,R,S	NR	NR	NR	NR		144
ferulic acid hexoside 3		AFC001673	AFC001673	no entry found	F,R,S	NR	NR	NR	NR		144
ferulic acid hexoside 4		AFC001674	AFC001674	no entry found	F,R,S	733.7	733.7	57.4	ug/100g	detected in rind 636.5±55.3; detected in seed 2196.8±330.4	144
ferulic acid hexoside 5		AFC001675	AFC001675	no entry found	F,R,S	NR	NR	NR	NR		144
ferulic acid hexoside 6		AFC001676	AFC001676	no entry found	F,R,S	72.5	72.5	8.3	ug/100g	detected in rind 57.3±7.6	144
ferulic acid hexoside 7		AFC001677	AFC001677	no entry found	F,R	50.7	50.7	7.2	ug/100g	detected in rind 41.9±4.5	144
ferulic acid hexoside 8		AFC001678	AFC001678	no entry found	F	NR	NR	NR	NR		144
ferulic acid hexoside I		AFC001679	AFC001679	no entry found	F	NR	NR	NR	NR		166
ferulic acid hexoside II		AFC001680	AFC001680	no entry found	F	NR	NR	NR	NR		166
ferulic acid hexoside III		AFC001681	AFC001681	no entry found	F	NR	NR	NR	NR		166
ferulic acid hexoside IV		AFC001682	AFC001682	no entry found	F	NR	NR	NR	NR		166
feruloyl-arabinofuranosylxylopyranose I		AFC001683	AFC001683	no entry found	F	NR	NR	NR	NR		166
feruloyl-CoA	trans-feruloyl-CoA	AFC001182	AFC001182	11966129	U						33
flavin mononucleotide	FMN;riboflavin monophosphate_x000D_ riboflavin 5'-monophosphate	AFC000824	AFC000824	643976	U						33
fluoride ion	F-	AFC000404	AFC000404	28179	F	1.5	1.5	NR	ug/100g		34
folic acid	total folate/folic acid;folacin	AFC001579	AFC001579	135398658	F	3	3	NR	ug/100g		34
folic acid	total folate/folic acid;folacin	AFC001579	AFC001579	135398658	F	0.259	0.259	NR	ppm		35
folic acid	total folate/folic acid;folacin	AFC001579	AFC001579	135398658	F	NR	NR	NR	NR	see reference for details	26
formaldehyde		AFC000095	AFC000095	712	U						33
formamide		AFC000096	AFC000096	713	U						33
formate		AFC000052	AFC000052	283	T	NR	NR	NR	NR	several cultivars sampled	170
formate		AFC000052	AFC000052	283	U						33
formate		AFC000052	AFC000052	283	F	0.017	0.017	NR	mmol/L	cv Zaojia 8424 at a normal potassium level; grafts on other rootstocks and at low potassium are presented, see ref for details	116
formic acid		AFC000053	AFC000053	284	J	NR	NR	NR	NR		145
fraxidin	8-hydroxy-6,7-dimethoxychromen-2-one	AFC000857	AFC000857	3083616	S	NR	NR	NR	NR		35
fructose	D-fructopyranose;D-fructopyranoside;D-fructose;fructopyranose;fructopyranoside	AFC000849	AFC000849	2723872	F	3.36	3.36	NR	g/100g		34
fructose	D-fructopyranose;D-fructopyranoside;D-fructose;fructopyranose;fructopyranoside	AFC000849	AFC000849	2723872	F	26	26	2	mg/g	cv 203Z	193
fructose	D-fructopyranose;D-fructopyranoside;D-fructose;fructopyranose;fructopyranoside	AFC000849	AFC000849	2723872	F	38	38	NR	mg/g	cv LSW177	129
fructose	D-fructopyranose;D-fructopyranoside;D-fructose;fructopyranose;fructopyranoside	AFC000849	AFC000849	2723872	J	90	335	NR	mg/g	several varieties sampled	158
fructose	D-fructopyranose;D-fructopyranoside;D-fructose;fructopyranose;fructopyranoside	AFC000849	AFC000849	2723872	J	NR	NR	NR	NR		145
fructose	D-fructopyranose;D-fructopyranoside;D-fructose;fructopyranose;fructopyranoside	AFC000849	AFC000849	2723872	J	NR	NR	NR	NR	several cultivars sampled	164
fructose	D-fructopyranose;D-fructopyranoside;D-fructose;fructopyranose;fructopyranoside	AFC000849	AFC000849	2723872	T	NR	NR	NR	NR	several cultivars sampled	170
fructose	D-fructopyranose;D-fructopyranoside;D-fructose;fructopyranose;fructopyranoside	AFC000849	AFC000849	2723872	F	2411.6	2411.6	NR	mg/100 g	cv F1 Oneida; grafts onto citron rootstocks were performed, see ref for details	187
fructose	D-fructopyranose;D-fructopyranoside;D-fructose;fructopyranose;fructopyranoside	AFC000849	AFC000849	2723872	F	35	35	3	mg/g	data are for SW frown in summer; data for 203Z and Sugar Baby were collected, see ref for details	156
fructose	D-fructopyranose;D-fructopyranoside;D-fructose;fructopyranose;fructopyranoside	AFC000849	AFC000849	2723872	F	51.34	51.34	NR	mg/g	cv SW at 34 days after pollination	138
fructose	D-fructopyranose;D-fructopyranoside;D-fructose;fructopyranose;fructopyranoside	AFC000849	AFC000849	2723872	F	53.5	53.5	NR	mg/g	cv 203Z at 34 days after pollination	138
fructose	D-fructopyranose;D-fructopyranoside;D-fructose;fructopyranose;fructopyranoside	AFC000849	AFC000849	2723872	F	153.12	153.12	14.3	mg/g dw	cv Lizhiguan; data for 11 other cultivars are presented, see ref for details	126
fructose	D-fructopyranose;D-fructopyranoside;D-fructose;fructopyranose;fructopyranoside	AFC000849	AFC000849	2723872	F	38.72	38.72	NR	mg/g	cv Zaojia 8424 at a normal potassium level; grafts on other rootstocks and at low potassium are presented, see ref for details	172
fructose	D-fructopyranose;D-fructopyranoside;D-fructose;fructopyranose;fructopyranoside	AFC000849	AFC000849	2723872	F	145	145	NR	mmol/L	cv Zaojia 8424 at a normal potassium level; grafts on other rootstocks and at low potassium are presented, see ref for details	116
fructose-1-phosphate		AFC000432	AFC000432	65246	U						33
fructose-6-phosphate	D-fructose-6-phosphate	AFC000447	AFC000447	69507	F	NR	NR	NR	NR		180
fructose-6-phosphate	D-fructose-6-phosphate	AFC000447	AFC000447	69507	U						33
fucosterol	delta-5-avenasterol;(24Z)-ethylidenecholesterol;isofucosterol	AFC000939	AFC000939	5281326	S	17	17	NR	mg/100g		130
fucosterol	delta-5-avenasterol;(24Z)-ethylidenecholesterol;isofucosterol	AFC000939	AFC000939	5281326	S	NR	NR	NR	NR		35
fucosterol	delta-5-avenasterol;(24Z)-ethylidenecholesterol;isofucosterol	AFC000939	AFC000939	5281326	U						33
fumarate	(E)-2-butenedioate	AFC001053	AFC001053	5460307	J	NR	NR	NR	NR		158
fumarate	(E)-2-butenedioate	AFC001053	AFC001053	5460307	J	NR	NR	NR	NR		145
fumarate	(E)-2-butenedioate	AFC001053	AFC001053	5460307	J	NR	NR	NR	NR	several cultivars sampled	164
fumarate	(E)-2-butenedioate	AFC001053	AFC001053	5460307	U						33
fumarate	(E)-2-butenedioate	AFC001053	AFC001053	5460307	F	0.025	0.025	NR	mmol/L	cv Zaojia 8424 at a normal potassium level; grafts on other rootstocks and at low potassium are presented, see ref for details	116
fumaric acid		AFC000767	AFC000767	444972	H	NR	NR	NR	NR		178
furfural	fur-2-aldehyde	AFC000276	AFC000276	7362	F	9.33	9.33	NR	ug/kg	cv Proteo ungrafted watermelon	173
gadoleic acid	cis-9-eicosenoic acid;9Z-eicosenoic acid	AFC000968	AFC000968	5282767	S	0.1	0.1	0.01	percent wwt		130
gadoleic acid	cis-9-eicosenoic acid;9Z-eicosenoic acid	AFC000968	AFC000968	5282767	S	0.1	0.1	0.01	percent	values for C. lanatus var. lanatus, see reference for values for var. citroides, detected with alternate methods	132
galactinol		AFC001167	AFC001167	11727586	U						33
galactinol		AFC001167	AFC001167	11727586	V	NR	NR	NR	NR	detected in phloem exudate	155
galactitol	dulcitol	AFC000345	AFC000212	11850	H	NR	NR	NR	NR		178
galactosylglycerol	3-beta-D-galactosyl-sn-glycerol	AFC001242	AFC001242	656504;16048618	U						33
gallic acid	3,4,5-trihydroxybenzoic acid	AFC000060	AFC000060	370	G	NR	NR	NR	NR	see reference for details on strains Calhoun Grey, Charleston Gray, PI-296341 and Sugar Baby	125
gallic acid	3,4,5-trihydroxybenzoic acid	AFC000060	AFC000060	370	J	NR	NR	NR	NR		145
gallic acid	3,4,5-trihydroxybenzoic acid	AFC000060	AFC000060	370	R	3.21	5.12	NR	ug/g		140
gallic acid	3,4,5-trihydroxybenzoic acid	AFC000060	AFC000060	370	S	2.559	2.559	NR	ug/ml		147
gamma-carotene		AFC000911	AFC000911	5280791	U						33
gamma-carotene		AFC000911	AFC000911	5280791	F	1.16	1.16	0.26	ug/g	data for three other stages of ripening are presented, see ref for details	182
gamma-dodecalactone	4-dodecanolide;5-octyloxolan-2-one	AFC001875	AFC001875	16821	F	NR	NR	NR	NR	see reference for details	26
gamma-ergostenol	delta-7-campesterol	AFC001503	AFC001503	91746604	S	10	10	NR	mg/100g		130
gamma-nonalactone	nonan-4-olide;5-pentyloxolan-2-one	AFC000285	AFC000285	7710	F	NR	0.003	NR	ug/kg	several mini-melons sampled	148
gamma-nonalactone	nonan-4-olide;5-pentyloxolan-2-one	AFC000285	AFC000285	7710	J	NR	NR	NR	NR		35
gamma-nonalactone	nonan-4-olide;5-pentyloxolan-2-one	AFC000285	AFC000285	7710	U						3
gamma-tocopherol		AFC000482	AFC000482	92729	S	1694.16	1694.16	4.04	mg/kg	values for C. lanatus var. lanatus, see reference for values for var. citroides	132
gamma-tocopherol		AFC000482	AFC000482	92729	S	NR	NR	NR	NR		108
gamma-tocopherol		AFC000482	AFC000482	92729	U						33
gastrodin	PUQSUZTXKPLAPR-UHFFFAOYSA-N	AFC001817	AFC001817	115067	U						3
GDP-4-keto-6-deoxymannose	GDP-4-dehydro-6-deoxy-D-mannose	AFC001564	AFC001564	135398621	U						33
GDP-beta-L-fucose		AFC001577	AFC001577	135398655	U						33
GDP-glucose	GDP-alpha-D-glucose	AFC001565	AFC001565	135398625	U						33
GDP-L-galactose		AFC001592	AFC001565	135515358	F	NR	NR	NR	NR		180
GDP-L-galactose		AFC001592	AFC001565	135515358	U						33
GDP-L-gulose		AFC001593	AFC001565	135803997	U						33
general polyphenols		AFC001685	AFC001685	no entry found	S	NR	NR	NR	NR		108
geraniol	lemonol	AFC000808	AFC000808	637566	J	NR	NR	NR	NR		35
geraniol	lemonol	AFC000808	AFC000808	637566	U						33
geraniol	lemonol	AFC000808	AFC000808	637566	U						3
geranyl diphosphate		AFC000779	AFC000779	445995	U						33
geranylacetone	(E)-geranylacetone;dihydropseudoionone	AFC000844	AFC000844	1549778	F	78	78	33	ug/kg	variety Rugby, see reference for values in unripe and overripe fruit	142
geranylacetone	(E)-geranylacetone;dihydropseudoionone	AFC000844	AFC000844	1549778	F	53.4	53.4	NR	ng/g	C. vulgaris Schrad	163
geranylacetone	(E)-geranylacetone;dihydropseudoionone	AFC000844	AFC000844	1549778	F	NR	NR	NR	NR		180
geranylacetone	(E)-geranylacetone;dihydropseudoionone	AFC000844	AFC000844	1549778	F	0	157	15	ng/g		120
geranylacetone	(E)-geranylacetone;dihydropseudoionone	AFC000844	AFC000844	1549778	F	0.004	0.01	NR	ug/kg	several mini-melons sampled	148
geranylacetone	(E)-geranylacetone;dihydropseudoionone	AFC000844	AFC000844	1549778	F,J	NR	NR	NR	NR		159
geranylacetone	(E)-geranylacetone;dihydropseudoionone	AFC000844	AFC000844	1549778	H	NR	NR	NR	NR		190
geranylacetone	(E)-geranylacetone;dihydropseudoionone	AFC000844	AFC000844	1549778	J	NR	NR	NR	NR		146
geranylacetone	(E)-geranylacetone;dihydropseudoionone	AFC000844	AFC000844	1549778	J	NR	NR	NR	NR		35
geranylacetone	(E)-geranylacetone;dihydropseudoionone	AFC000844	AFC000844	1549778	U						3
geranylacetone	(E)-geranylacetone;dihydropseudoionone	AFC000844	AFC000844	1549778	J	13.86	13.86	1.01	ug/L	cv Lizhiguan; data for 11 other cultivars are presented, see ref for details	126
geranylacetone	(E)-geranylacetone;dihydropseudoionone	AFC000844	AFC000844	1549778	F	134.9	134.9	NR	mg/100 g	cv F1 Oneida; grafts onto citron rootstocks were performed, see ref for details	187
geranylgeranyl diphosphate		AFC000788	AFC000788	447277	F	NR	NR	NR	NR		180
germacrene B	(1E,5E)-1,5-dimethyl-8-(propan-2-ylidene)cyclodeca-1,5-diene	AFC000944	AFC000944	5281519	F	NR	0.001	NR	ug/kg	several mini-melons sampled	148
gibberellic acid		AFC001835	AFC001835	6466	G	NR	NR	NR	NR	see reference for details on strains Calhoun Grey, Charleston Gray, PI-296341 and Sugar Baby	125
gibberellin A1	GA1	AFC000874	AFC000874	5280379	U						33
gibberellin A110	GA110	AFC001326	AFC001326	25243953	U						33
gibberellin A12	GA12	AFC000752	AFC000752	443450	U						33
gibberellin A12 aldehyde	GA12-aldehyde	AFC001040	AFC001040	5459783	U						33
gibberellin A13	GA13	AFC001154	AFC001154	10883375	U						33
gibberellin A15 (open lactone form)	GA15 (open lactone form)	AFC001354	AFC001354	25245948	U						33
gibberellin A17	GA17	AFC001061	AFC001061	5460657	U						33
gibberellin A19	GA19	AFC001049	AFC001049	5460209	U						33
gibberellin A20	GA20	AFC000884	AFC000884	5280481	U						33
gibberellin A24	GA24	AFC000753	AFC000753	443454	U						33
gibberellin A25	GA25	AFC001222	AFC001222	14464358	U						33
gibberellin A29	GA29	AFC001226	AFC001226	14605548	U						33
gibberellin A29-catabolite	GA29-catabolite	AFC001304	AFC001304	25200854	U						33
gibberellin A34	GA34	AFC000957	AFC000957	5281987	U						33
gibberellin A34-catabolite	GA34-catabolite	AFC001308	AFC001308	25201142	U						33
gibberellin A36	GA36	AFC000754	AFC000754	443455	U						33
gibberellin A38	GA38;3,13-dihydroxygibberellin A15	AFC001229	AFC001229	14833724	U						33
gibberellin A4	GA4	AFC000475	AFC000475	92109	U						33
gibberellin A44	GA44	AFC001056	AFC001056	5460372	U						33
gibberellin A44 open lactone	GA44 open lactone;gibberellin A44 diacid	AFC001325	AFC001325	25243940	U						33
gibberellin A51	GA51	AFC000755	AFC000755	443458	U						33
gibberellin A51-catabolite	GA51-catabolite	AFC001311	AFC001311	25201559	U						33
gibberellin A53	GA53	AFC000727	AFC000727	440914	U						33
gibberellin A8	GA8	AFC000901	AFC000901	5280607	U						33
gibberellin A8-catabolite	GA8-catabolite	AFC000756	AFC000756	443463	U						33
gibberellin A9	GA9	AFC000956	AFC000956	5281984	U						33
gibberellin A97	GA97	AFC001321	AFC001321	25203277	U						33
gibberellin A98	GA98	AFC001515	AFC001515	101997919	U						33
ginkgolic acid	romanicardic acid	AFC000953	AFC000953	5281858	S	NR	NR	NR	NR		108
glehlinoside C		AFC001145	AFC001145	10007781	F	NR	NR	NR	NR		166
glehlinoside C		AFC001145	AFC001145	10007781	F,R,S	9.9	9.9	1.4	ug/100g	values are for rind	144
gluconic acid	D-gluconate	AFC000332	AFC000332	10690	H	NR	NR	NR	NR		178
gluconic acid	D-gluconate	AFC000332	AFC000332	10690	U						33
gluconolactone	D-(+)-glucono-1,5-lactone;D-glucono-1,5-lactone;fujiglucon	AFC000271	AFC000271	7027	H	NR	NR	NR	NR		178
gluconolactone	D-(+)-glucono-1,5-lactone;D-glucono-1,5-lactone;fujiglucon	AFC000271	AFC000271	7027	U						33
glucosamine		AFC000646	AFC000646	439213	F	NR	NR	NR	NR	see reference for details	26
glucosamine		AFC000646	AFC000646	439213	H	NR	NR	NR	NR		178
glucose		AFC000214	AFC000214	5793	F	1.58	1.58	NR	g/100g		34
glucose		AFC000214	AFC000214	5793	F	13	13	2	mg/g	cv 203Z	193
glucose		AFC000214	AFC000214	5793	F	2	2	NR	mg/g	cv LSW177	129
glucose		AFC000214	AFC000214	5793	J	89	281	NR	mg/g	several varieties sampled	158
glucose		AFC000214	AFC000214	5793	J	NR	NR	NR	NR		145
glucose		AFC000214	AFC000214	5793	J	NR	NR	NR	NR	several cultivars sampled	164
glucose		AFC000214	AFC000214	5793	T	NR	NR	NR	NR	several cultivars sampled	170
glucose		AFC000214	AFC000214	5793	F	1630.9	1630.9	NR	mg/100 g	cv F1 Oneida; grafts onto citron rootstocks were performed, see ref for details	187
glucose		AFC000214	AFC000214	5793	F	14.9	14.9	1.5	mg/g	data are for SW frown in summer; data for 203Z and Sugar Baby were collected, see ref for details	156
glucose		AFC000214	AFC000214	5793	F	17.45	17.45	NR	mg/g	cv SW at 34 days after pollination	138
glucose		AFC000214	AFC000214	5793	F	14.43	14.43	NR	mg/g	cv 203Z at 34 days after pollination	138
glucose		AFC000214	AFC000214	5793	F	51.23	51.23	9.19	mg/g dw	cv Lizhiguan; data for 11 other cultivars are presented, see ref for details	126
glucose		AFC000214	AFC000214	5793	F	24.99	24.99	NR	mg/g	cv Zaojia 8424 at a normal potassium level; grafts on other rootstocks and at low potassium are presented, see ref for details	172
glucose		AFC000214	AFC000214	5793	F	89.9	89.9	NR	mmol/L	cv Zaojia 8424 at a normal potassium level; grafts on other rootstocks and at low potassium are presented, see ref for details	116
glutamate-1-semialdehyde	4-amino-5-oxopentanoate	AFC000549	AFC000549	129297	U						33
glutamic acid	2-aminopentanedioic acid; glutamate;L-glutamic acid;L-glutamate	AFC000413	AFC000413	33032	F	0.063	0.063	NR	g/100g		34
glutamic acid	2-aminopentanedioic acid; glutamate;L-glutamic acid;L-glutamate	AFC000413	AFC000413	33032	F	NR	NR	NR	NR	see reference for details	26
glutamic acid	2-aminopentanedioic acid; glutamate;L-glutamic acid;L-glutamate	AFC000413	AFC000413	33032	F,S	7420	7420	NR	ppm	53000 ppm in seed	35
glutamic acid	2-aminopentanedioic acid; glutamate;L-glutamic acid;L-glutamate	AFC000413	AFC000413	33032	G	NR	NR	NR	NR		167
glutamic acid	2-aminopentanedioic acid; glutamate;L-glutamic acid;L-glutamate	AFC000413	AFC000413	33032	H	NR	NR	NR	NR		178
glutamic acid	2-aminopentanedioic acid; glutamate;L-glutamic acid;L-glutamate	AFC000413	AFC000413	33032	J	NR	NR	NR	NR		158
glutamic acid	2-aminopentanedioic acid; glutamate;L-glutamic acid;L-glutamate	AFC000413	AFC000413	33032	L	NR	NR	NR	NR	assayed under various conditions	154
glutamic acid	2-aminopentanedioic acid; glutamate;L-glutamic acid;L-glutamate	AFC000413	AFC000413	33032	S	16.9	16.9	NR	g/100g protein		98
glutamic acid	2-aminopentanedioic acid; glutamate;L-glutamic acid;L-glutamate	AFC000413	AFC000413	33032	T	NR	NR	NR	NR	several cultivars sampled	170
glutamic acid	2-aminopentanedioic acid; glutamate;L-glutamic acid;L-glutamate	AFC000413	AFC000413	33032	U						33
glutamic acid	2-aminopentanedioic acid; glutamate;L-glutamic acid;L-glutamate	AFC000413	AFC000413	33032	V	NR	NR	NR	NR	detected in phloem exudate	155
glutamic acid	2-aminopentanedioic acid; glutamate;L-glutamic acid;L-glutamate	AFC000413	AFC000413	33032	F	0.642	0.642	NR	mmol/L	cv Zaojia 8424 at a normal potassium level; grafts on other rootstocks and at low potassium are presented, see ref for details	116
glutamic acid	2-aminopentanedioic acid; glutamate;L-glutamic acid;L-glutamate	AFC000413	AFC000413	33032	F	2.2	2.2	NR	mg/100 g	cv F1 Oneida; grafts onto citron rootstocks were performed, see ref for details	187
glutamine	2,5-diamino-5-oxopentanoic acid;L-glutamine	AFC001774	AFC001774	5961	H	NR	NR	NR	NR		178
glutamine	2,5-diamino-5-oxopentanoic acid;L-glutamine	AFC001774	AFC001774	5961	J	NR	NR	NR	NR		145
glutamine	2,5-diamino-5-oxopentanoic acid;L-glutamine	AFC001774	AFC001774	5961	J	NR	NR	NR	NR	several cultivars sampled	164
glutamine	2,5-diamino-5-oxopentanoic acid;L-glutamine	AFC001774	AFC001774	5961	L	NR	NR	NR	NR	assayed under various conditions	154
glutamine	2,5-diamino-5-oxopentanoic acid;L-glutamine	AFC001774	AFC001774	5961	T	NR	NR	NR	NR	several cultivars sampled	170
glutamine	2,5-diamino-5-oxopentanoic acid;L-glutamine	AFC001774	AFC001774	5961	U						33
glutamine	2,5-diamino-5-oxopentanoic acid;L-glutamine	AFC001774	AFC001774	5961	F	2.685	2.685	NR	mmol/L	cv Zaojia 8424 at a normal potassium level; grafts on other rootstocks and at low potassium are presented, see ref for details	116
glutathione		AFC000544	AFC000544	124886	U						33
glutathione disulfide	GSSG;oxiglutatione;oxidized glutathione	AFC000435	AFC000435	65359	F	NR	NR	NR	NR	see reference for details	26
glutathione disulfide	GSSG;oxiglutatione;oxidized glutathione	AFC000435	AFC000435	65359	U						33
glycerol		AFC000098	AFC000098	753	U						33
glyceryl monostearate	glyceryl 1-monostearate;1-octadecanoyl-rac-glycerol	AFC000394	AFC000394	24699	U						33
glyceryl palmitate	1-monopalmitin	AFC001900	AFC001900	14900	F	NR	NR	NR	NR	see reference for details	26
glycine		AFC000097	AFC000097	750	F	0.01	0.01	NR	g/100g		34
glycine		AFC000097	AFC000097	750	F	1178	1178	NR	ppm		35
glycine		AFC000097	AFC000097	750	G	NR	NR	NR	NR		167
glycine		AFC000097	AFC000097	750	L	NR	NR	NR	NR	assayed under various conditions	154
glycine		AFC000097	AFC000097	750	U						33
glycocyamine	guanidoacetate	AFC001768	AFC001768	763	T	NR	NR	NR	NR	several cultivars sampled	170
glycolaldehyde	2-hydroxyethanal	AFC000099	AFC000099	756	U						33
glycolate		AFC000100	AFC000100	757	U						33
glycyl-peptide		AFC001686	AFC001686	no entry found	U						33
glyoxylate		AFC000860	AFC000860	3614358	U						33
guanine		AFC001570	AFC001570	135398634	F	NR	NR	NR	NR	see reference for details	26
guanine		AFC001570	AFC001570	135398634	U						33
guanosine		AFC001571	AFC001571	135398635	U						33
guanosine 3'-diphosphate 5'-triphosphate	pppGpp	AFC001567	AFC001567	135398629	U						33
guanosine diphosphate mannose	GDP-alpha-D-mannose;GDP-D-mannose	AFC001566	AFC001565	135398627	F	NR	NR	NR	NR		180
guanosine diphosphate mannose	GDP-alpha-D-mannose;GDP-D-mannose	AFC001566	AFC001565	135398627	U						33
guanosine-5'-diphosphate	GDP	AFC001563	AFC001563	135398619	U						33
guanosine-5'-monophosphate	GMP	AFC001568	AFC001568	135398631	U						33
guanosine-5'-triphosphate	GTP	AFC001569	AFC001569	135398633	U						33
H+	proton;hydron	AFC000160	AFC000160	1038	U						33
hederagenin		AFC000457	AFC000457	73299	U						33
hemicellulose		AFC001687	AFC001687	no entry found	S	NR	NR	NR	NR		181
heneicosane	n-heneicosane	AFC000357	AFC000357	12403	F	NR	NR	NR	NR		152
heneicosane	n-heneicosane	AFC000357	AFC000357	12403	J	NR	NR	NR	NR		35
heneicosane	n-heneicosane	AFC000357	AFC000357	12403	U						3
hentriacontane	untriacontane	AFC000358	AFC000358	12410	F	NR	NR	NR	NR		35
heptadecane		AFC000355	AFC000355	12398	F	NR	NR	NR	NR		152
[truncated: 1,266 more rows]
