# Supplementary material for: A Catalog of Natural Products Occurring in Watermelon—Citrullus lanatus
Source: Front Nutr. 2021 Sep 14;8:729822. doi: 10.3389/fnut.2021.729822 (PMC8476801; doi:10.3389/fnut.2021.729822)
Supplement: Supplementary file 3 [file Table_3.XLSX]

## Sheet: Sheet 1 - Data dictionary
Data dictionary
Table(s)	Term/abbreviation	Defintion	Term_type
S1,S2	AFC_ID	unique identifier, see main text	text
S1	AlogP	a measure of a compound’s hydrophilic or lipophilic nature	numeric
S2	Alternate names	common alternate names of the compound	text
S2	amount_high	high of the reported range for quantification	numeric
S2	amount_low	low of the reported range for quantification	numeric
S1	apoI	sum of the atomic polarizabilities of all the molecule constituents, including hydrogens	numeric
S1	CAS_ID	CAS® - Chemical Abstracts Service identifier	text
S1	ChEBI_ID	Chemical Entities of Biological Interest identifier	numeric
S2	Comment	additional information	text
S1,S2	Compound	English name of the compound	text
S1	Eccentric Connectivity Index Descriptor	molecular descriptor reflecting a topological index of a compound based on xxx	numeric
S1	FooDB_ID	FooDB identifier	text
S1	FSP3	a measure of drug likeness based on the fraction of carbon atoms with bond saturation	numeric
S1	HMDB_ID	Human Metabolome Database identifier	text
S1	InChI	IUPAC (International Union of Pure and Applied Chemistry) International Chemical identifier, notation to represent a chemical structure as a text string	text
S1	InChI Key	27-character version of the InChI identifier, notation to represent a chemical structure as a text string	text
S1	KEGG_ID	Kyoto Encyclopedia of Genes and Genomes identifier	text
S1	LipidMaps_ID	LipidMaps identifier	numeric
S1	Lipinski Rule Of 5 Failures	a measure of potential oral activity in humans	numeric
S1	Molecular Formula	molecular formula of the compound	numeric
S1	Molecular Weight	molecular weight of the compound	numeric
S2	plant_part	plant tissue in which the compound was detected: F, flesh, red flesh; G, seedling; H, heart tissue; J, juice; L, leaf; P, peel; R, rind; S, seed; T, root; U, detected but undeclared; V, plant; W, powdered juice; Y, yellow flesh	text
S2	plus_minus	variance, as reported in the reference	numeric
S1,S2	PubChem_ID	PubChem identifier	numeric
S1	SMILES	Simplified Molecular Input Line Entry System, notation to represent a chemical structure as a text string	text
S2	Source	literature or database source of the detected compound	text
S1	Topo PSA	topological polar surface area, which correlates with passive molecular transport through membranes	numeric
S2	units	units of concentration, fresh wet weight unless noted otherwise	text
S1	Zagreb Index	molecular descriptor reflecting a topological index of a compound based on angles of vertices	numeric
